# Supplementary material for: “C–H⋯π Interaction” regulates the stereoselectivity in olefin polymerization
Source: Royal Society of Chemistry journal article supplement (doi:10.1039/c9cc02165e), 2019-01-01
Supplement: c9cc02165e1.pdf [file c9cc02165e1.pdf]

## *Electronic Supplementary Information*

### **“C–H $\cdots$ $\pi$ Interaction” Regulates Stereoselectivity in Olefin Polymerization**

Yanan Zhao,<sup>a</sup> Gen Luo,<sup>a,\*</sup> Xiaohui Kang,<sup>a,b</sup> Fang Guo,<sup>a</sup> Xuefeng Zhu,<sup>c</sup> Rencheng Zheng,<sup>c</sup>  
Zhaomin Hou<sup>d</sup> and Yi Luo<sup>a,\*</sup>

<sup>a</sup>*State Key Laboratory of Fine Chemicals, School of Chemical Engineering, Dalian University of Technology, Dalian 116024, China*

<sup>b</sup>*College of Pharmacy, Dalian Medical University, Dalian, Liaoning 116044, China*

<sup>c</sup>*School of Automotive Engineering, Dalian University of Technology, Dalian 116024, China*

<sup>d</sup>*Organometallic Chemistry Laboratory, RIKEN Cluster for Pioneering Research, and Advanced Catalysis Research Group, RIKEN Center for Sustainable Resource Science, 2-1 Hirosawa, Wako, Saitama 351-0198, Japan*

E-mails: luogen@dlut.edu.cn (G.L.); luoyi@dlut.edu.cn (Y.L.)

## COMPUTATIONAL DETAILS

All calculations were performed with the Gaussian 09 program.<sup>S1</sup> The B3PW91 hybrid exchange-correlation functional was utilized for geometry optimization.<sup>S2-S4</sup> Each optimized structure was subsequently analyzed by harmonic vibration frequencies for characterization of a minimum ( $N_{\text{imag}} = 0$ ) or a transition state ( $N_{\text{imag}} = 1$ ) and providing thermodynamic data. The transition state structures are shown to connect the reactant and product on either side via intrinsic reaction coordinate (IRC) following. The 6-31G\* basis set was considered for C, H, O, N, F, and Cl atoms. The Sc and Si atoms were treated by the Stuttgart/Dresden effective core potential (ECP) and the associated basis sets.<sup>S5,S6</sup> The basis sets of Si was augmented with one *d*-polarization function (exponent of 0.284). This basis set is denoted as “BSI”. Such a computational strategy has been widely used for the study of transition-metal containing systems.<sup>S7-S10</sup> To obtain more reliable relative energies, the single-point calculations of optimized structures were carried out at the level of M06<sup>S11</sup>/BSII, taking into account solvation effect of chlorobenzene with the SMD<sup>S12</sup> solvation model. In the BSII, the 6-311+G(d,p) basis set was used for nonmetal atoms, while the basis sets together with associated pseudopotentials for Sc atoms are the same as that in geometry optimization. Therefore, unless otherwise mentioned, the free energy ( $\Delta G$ , 298.15 K, 1 atm) in solution, which was used for description of energy profiles, was obtained from the solvation single-point calculation and the gas-phase Gibbs free energy correction. The 3D molecular structures displayed in this paper were drawn by using CYLview.<sup>S13</sup>

In energy decomposition analysis (EDA), the energies of two fragments, viz., the monomer moiety (A) and the remaining metal complex (B), in the TS geometries were evaluated via single-point calculations. Such single-point energies of the fragments and the energy of TS were used to estimate the interaction energy  $\Delta E_{\text{int}}$ . These energies, together with the energies of the respective fragments in their optimal geometry, allow for the estimation of the deformation energies of the two fragments,  $\Delta E_{\text{def}}(\text{A})$  and  $\Delta E_{\text{def}}(\text{B})$ . As the energy of the TS,  $\Delta E_{\text{TS}}$ , is evaluated with respect to the energy of the two separated fragments, the relation  $\Delta E_{\text{TS}} = \Delta E_{\text{int}} + \Delta E_{\text{def}}(\text{A}) + \Delta E_{\text{def}}(\text{B})$  holds.

## References

- (S1) M. J. Frisch, G. W. Trucks, H. B. Schlegel, G. E. Scuseria, M. A. Robb, J. R. Cheeseman, G. Scalmani, V. Barone, B. Mennucci, G. A. Petersson, H. Nakatsuji, M. Caricato, X. Li, H. P. Hratchian, A. F. Izmaylov, J. Bloino, G. Zheng, J. L. Sonnenberg, M. Hada, M. Ehara, K. Toyota, R. Fukuda, J. Hasegawa, M. Ishida, T. Nakajima, Y. Honda, O. Kitao, H. Nakai, T. Vreven, J. A. Montgomery Jr., J. E. Peralta, F. Ogliaro, M. J. Bearpark, J. Heyd, E. N. Brothers, K. N. Kudin, V. N. Staroverov, R. Kobayashi, J. Normand, K. Raghavachari, A. P. Rendell, J. C. Burant, S. S. Iyengar, J. Tomasi, M. Cossi, N. Rega, N. J. Millam, M. Klene, J. E. Knox, J. B. Cross, V. Bakken, C. Adamo, J. Jaramillo, R. Gomperts, R. E. Stratmann, O. Yazyev, A. J. Austin, R. Cammi, C. Pomelli, J. W. Ochterski, R. L. Martin, K. Morokuma, V. G. Zakrzewski, G. A. Voth, P. Salvador, J. J. Dannenberg, S. Dapprich, A. D. Daniels, Ö. Farkas, J. B. Foresman, J. V. Ortiz, J. Cioslowski and D. J. Fox, *Gaussian 09, Revision A.01*; Gaussian, Inc.: Wallingford, CT, 2009.
- (S2) A. Becke, *J. Chem. Phys.*, 1993, **98**, 5648–5653.
- (S3) C. Lee, W. Yang, R. Parr, *Phys. Rev. B*, 1988, **37**, 785–789.
- (S4) J. Perdew, K. Burke, Y. Wang, *Phys. Rev. B*, 1996, **54**, 16533–16539.
- (S5) D. Andrae, U. Haussermann, M. Dolg, H. Stoll, H. Preuss, *Theor. Chim. Acta*, 1990, **77**, 123–141.
- (S6) J. Martin, A. Sundermann, *J. Chem. Phys.*, 2001, **114**, 3408–3420.
- (S7) X. Kang, A. Yamamoto, M. Nishiura, Y. Luo, Z. Hou, *Organometallics*, 2015, **34**, 5540–5548.
- (S8) X. Kang, Y. Luo, Z. Hou, *Organometallics*, 2016, **35**, 913–920.
- (S9) L. Perrin, F. Bonnet, M. Visseaux, L. Maron, *Chem. Commun.*, 2010, **46**, 2965–2967.
- (S10) L. Perrin, F. Bonnet, T. Chenal, M. Visseaux, L. Maron, *Chem. -Eur. J.*, 2010, **16**, 11376–11385.
- (S11) Y. Zhao, D. Truhlar, *J. Chem. Theory Comput.*, 2009, **5**, 324–333.
- (S12) A. Marenich, C. Cramer, D. Truhlar, *J. Phys. Chem. B*, 2009, **113**, 6378–6396.
- (S13) C. Y. Legault, *CYLview, 1.0b*; Université de Sherbrooke, 2009; <http://www.cylview.org>.

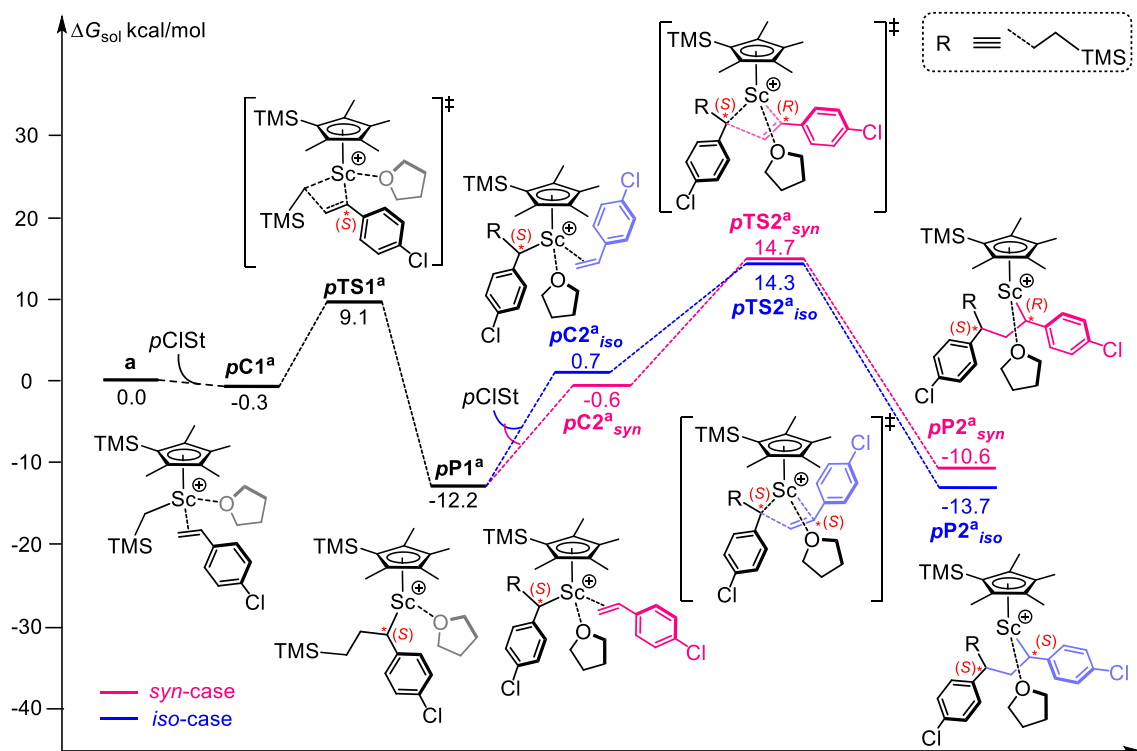

**Fig. S1** Computed energy profiles ( $\text{kcal mol}^{-1}$ ) for **a** mediated C=C insertion of the first and second *pClSt*. The syndiotactic pathway is in pink and the isospecific one is in blue.

As shown in Fig. S1, the chain initiation starts with the formation of a  $\pi$ -complex *pC1<sup>a</sup>*, which surmounts an energy barrier of  $9.4 \text{ kcal mol}^{-1}$  via the transition state (TS) *pTS1<sup>a</sup>* to result in a more stable *pP1<sup>a</sup>* complex.

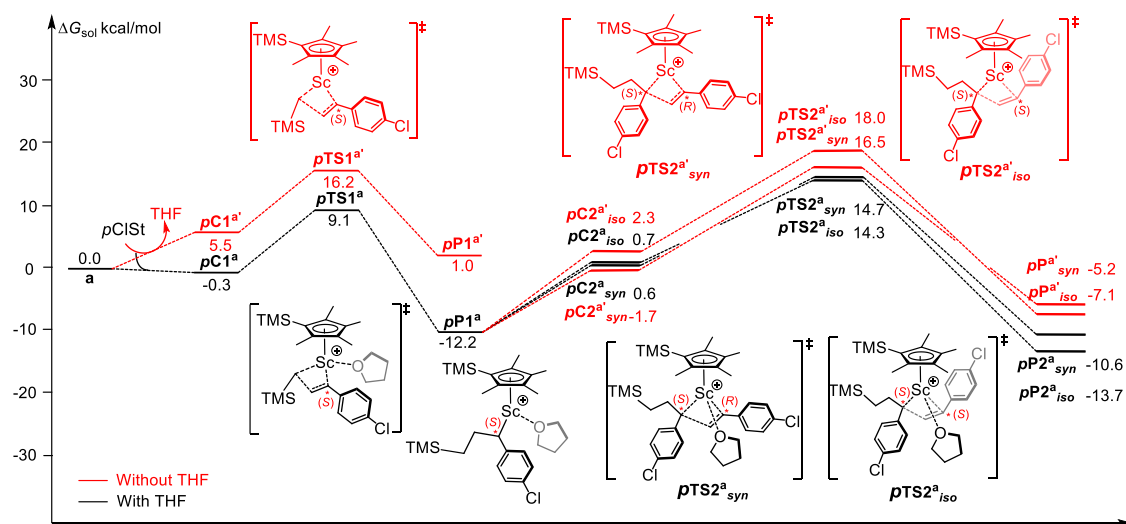

**Fig. S2** Calculated energy profiles for olefin insertion into Sc species with THF (black curve) and without THF (red curve) of the first and second molecule of *pClSt*. The pathway with the superscript of **a'** represents the THF-free case.

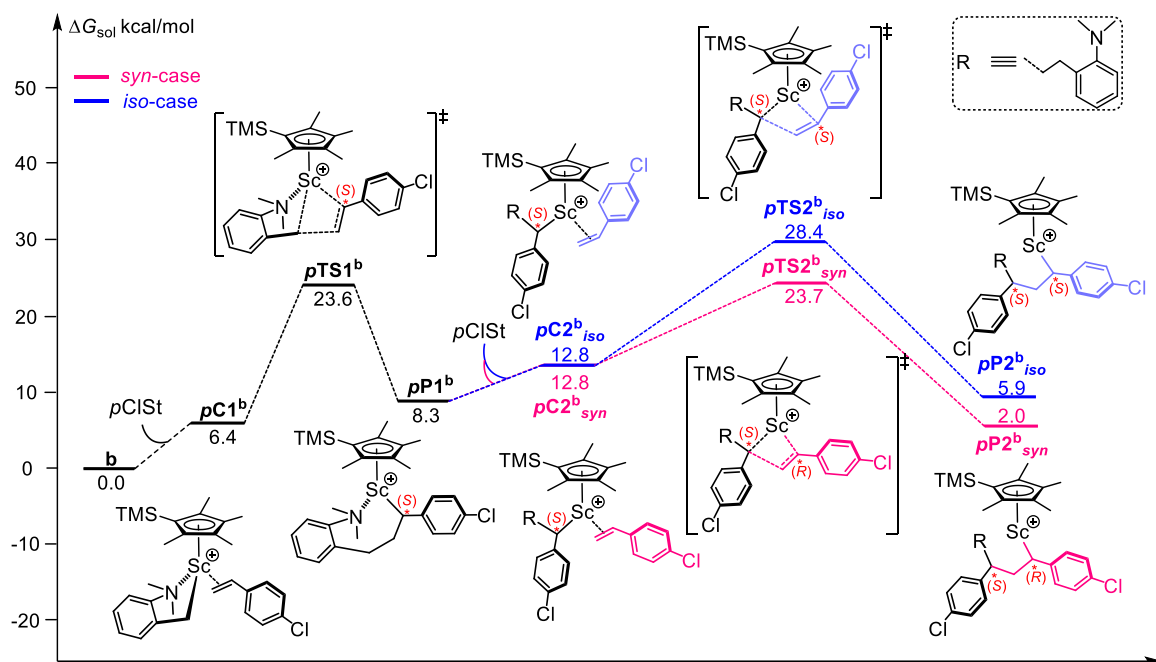

**Fig. S3** Computed energy profiles ( $\text{kcal mol}^{-1}$ ) for **b** mediated C=C insertion of the first and second *pClSt*. The syndiotactic pathway is in pink while the isospecific one is in blue.

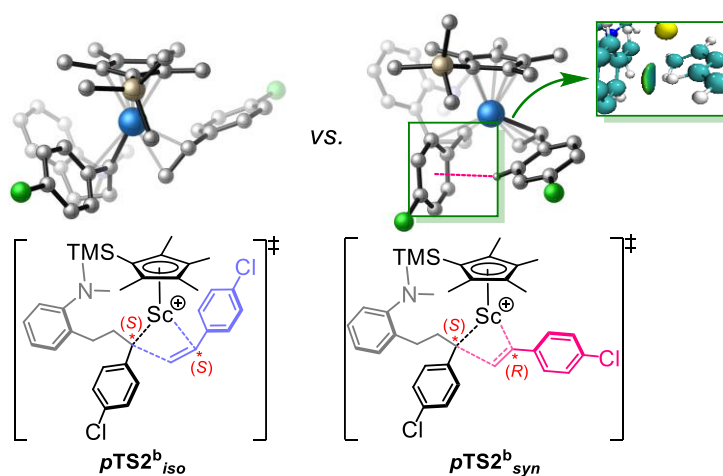

**Fig. S4** Interaction analyses for  $pTS2^b_{iso}$  and  $pTS2^b_{syn}$ . The green cloud represents the existence of weak interaction.

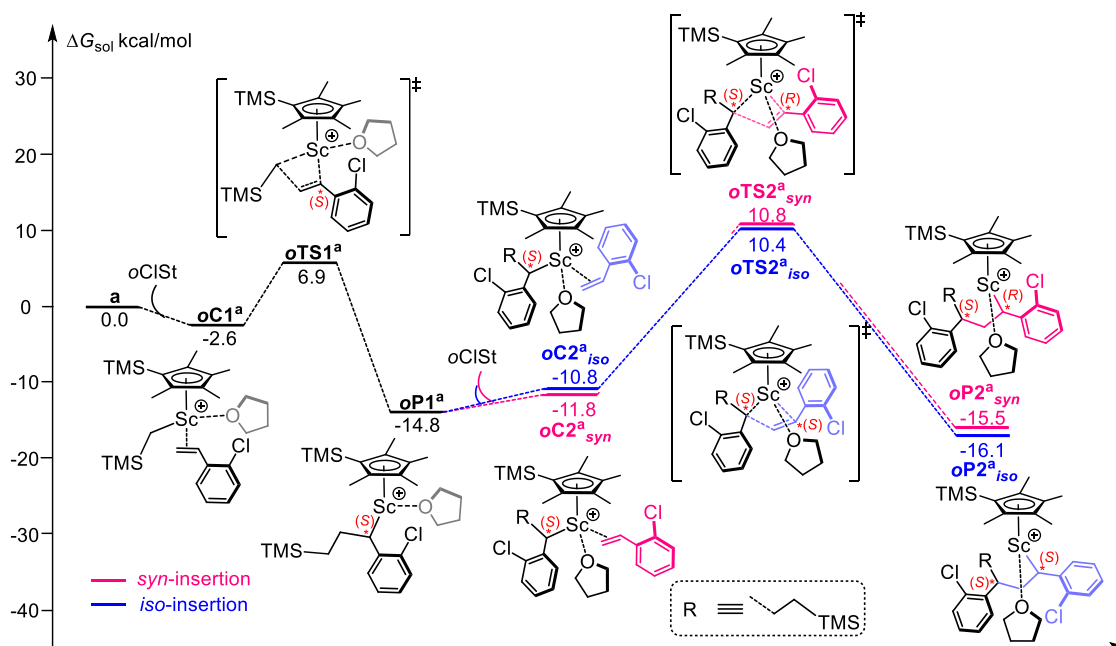

**Fig. S5** Computed energy profiles ( $\text{kcal mol}^{-1}$ ) for **a** mediated C=C insertion of the first and second molecules of *o*ClSt. The syndiotactic polymerization pathway is in pink and the isospecific one is in blue.

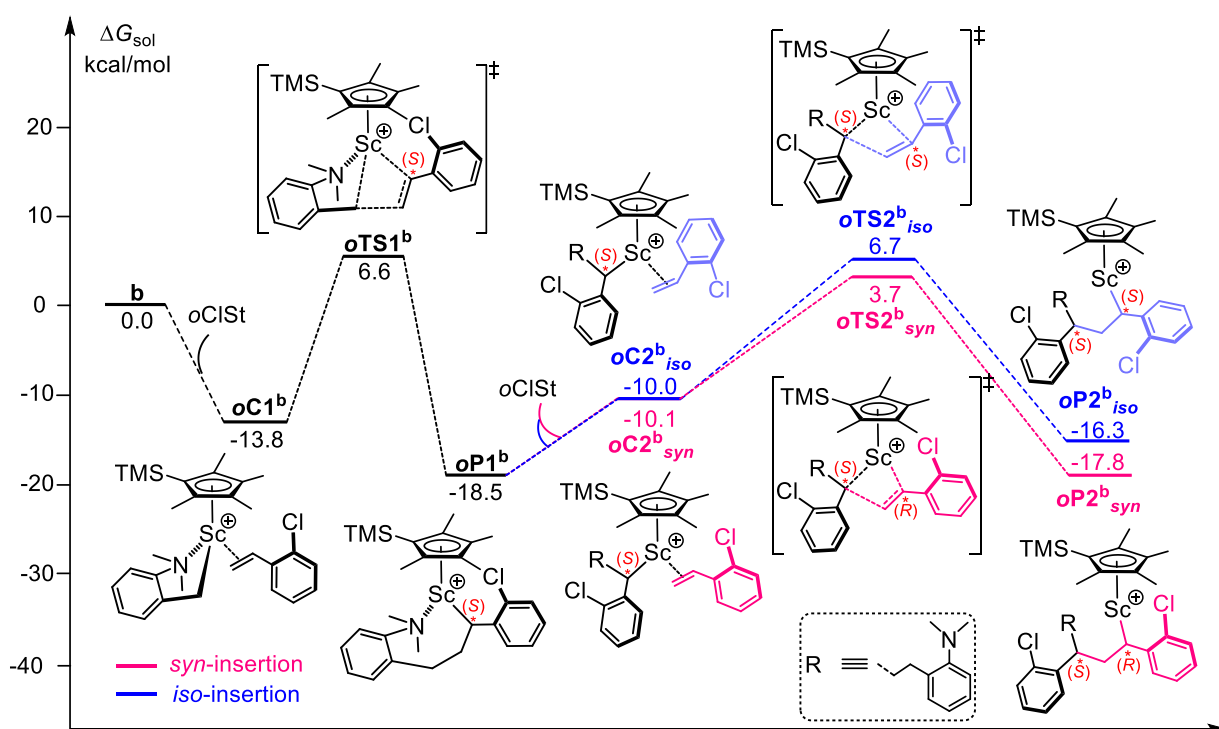

**Fig. S6** Computed energy profiles ( $\text{kcal mol}^{-1}$ ) for **b** mediated C=C insertion of the first and second molecules of *o*ClSt. The syndiotactic polymerization pathway is in pink and the isospecific one is in blue.

The computational results also show that *iso* and *syndio*-enchainment are kinetically competitive

in **a** system ( $\Delta G^\ddagger = 25.2$  vs.  $25.6$  kcal mol<sup>-1</sup>, Fig. S5). However, in the **b** mediated polymerization of *o*ClSt, the *syndio*-fashion is more favorable than the *iso*-fashion by  $3.0$  kcal mol<sup>-1</sup> ( $\Delta G^\ddagger = 22.2$  vs.  $25.2$  kcal mol<sup>-1</sup>, Fig. S6). These results are in good agreement with the experimentally observed various stereoselectivities (ref. 10).

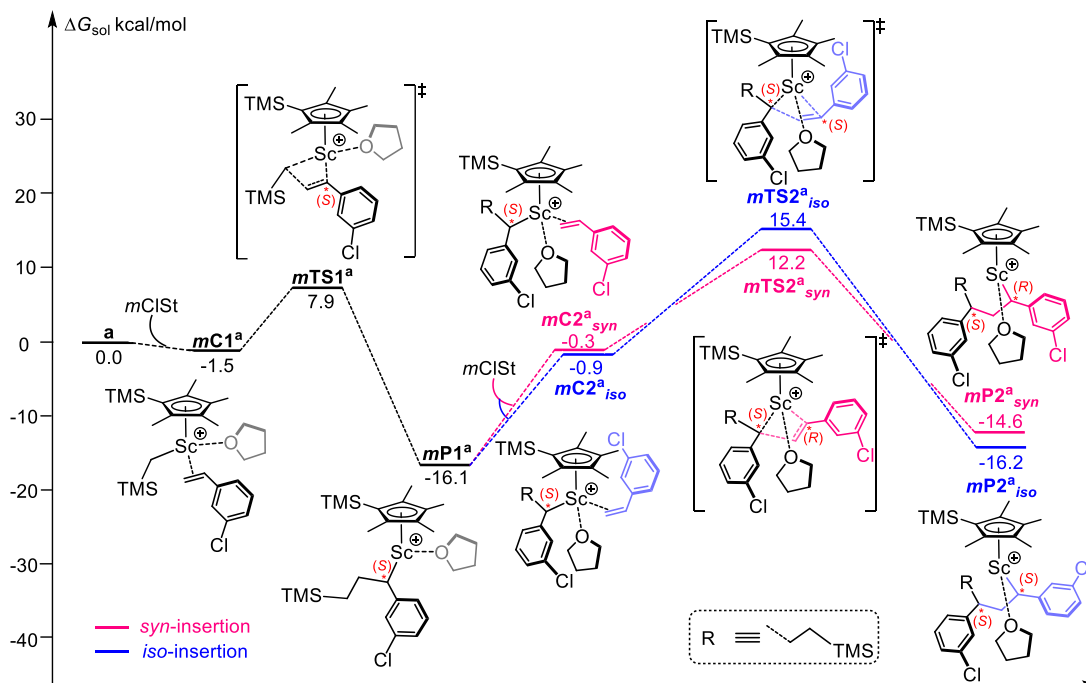

**Fig. S7** Computed energy profiles (kcal mol<sup>-1</sup>) for **a** mediated C=C insertion of the first and second molecules of *m*ClSt. The syndiotactic polymerization pathway is in pink and the isotactic one is in blue.

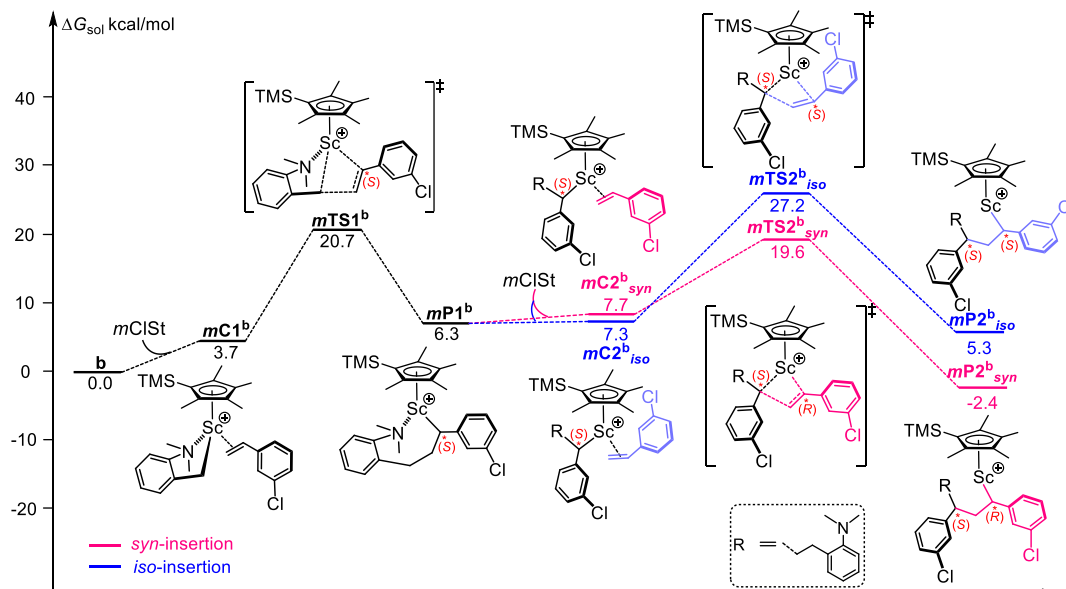

**Fig. S8** Computed energy profiles (kcal mol<sup>-1</sup>) for **b** mediated C=C insertion of the first and second molecules of *m*ClSt. The syndiotactic polymerization pathway is in pink and the isotactic one is in blue.

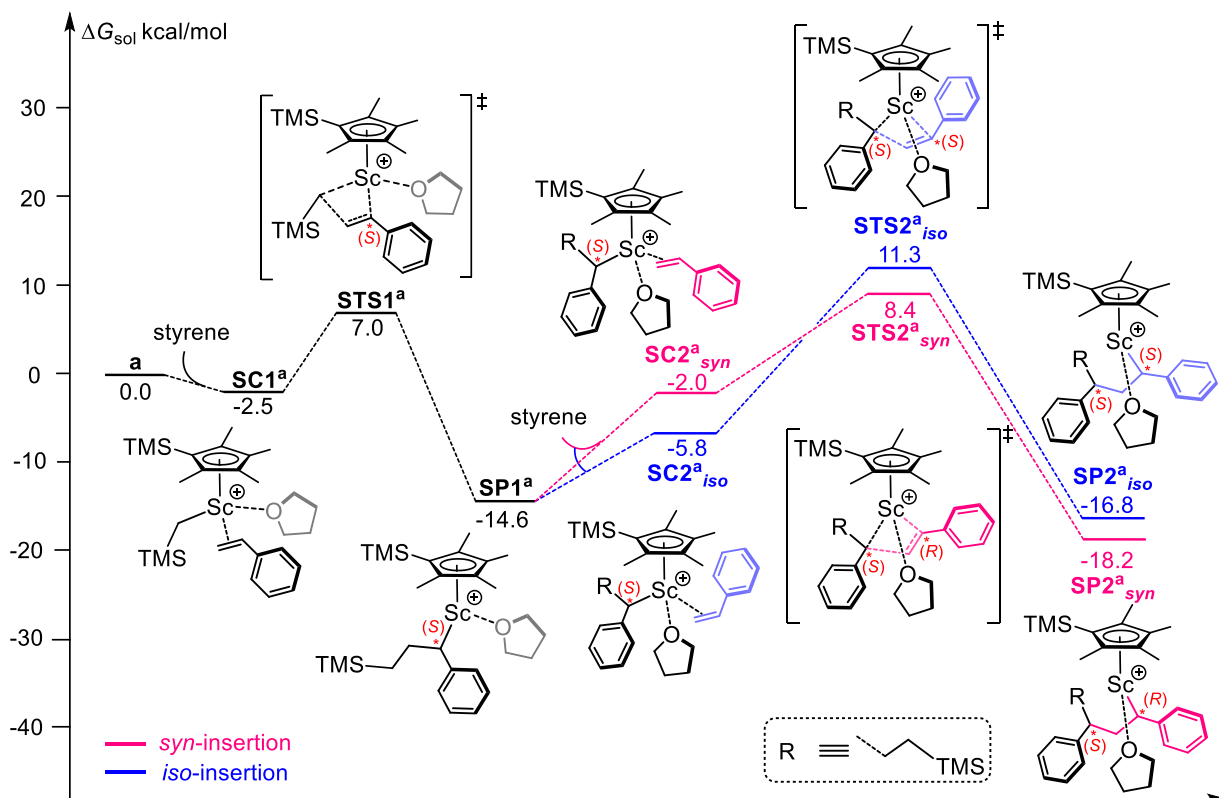

**Fig. S9** Computed energy profiles ( $\text{kcal mol}^{-1}$ ) for **a** mediated C=C insertion of the first and second molecules of styrene by cationic species. The syndiotactic polymerization pathway is in pink and the isospecific one is in blue.

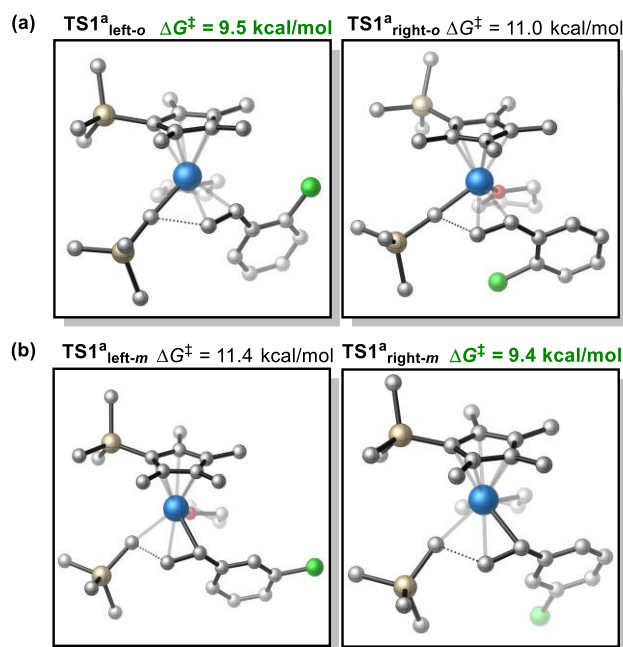

**Fig. S10** (a) Transition states for the first insertion of isomer of *o*-ClSt in **a**-catalyzed systems. (b) Transition states for the first insertion of isomers of *m*-ClSt in **a**-catalyzed systems. Energies are given in  $\text{kcal mol}^{-1}$ .



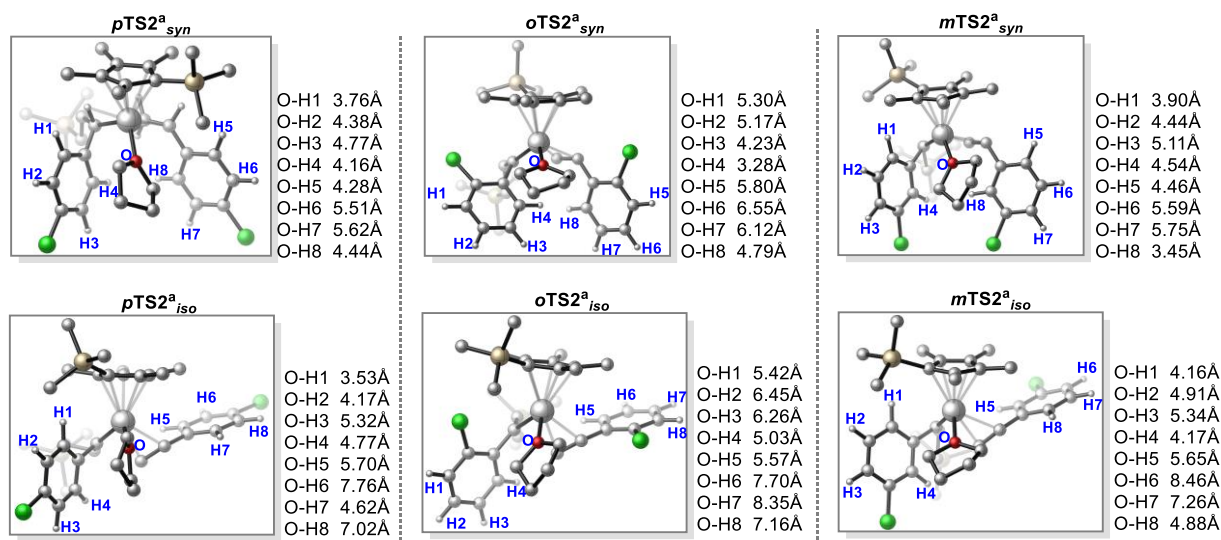

**Fig. S11** Geometric structures of  $pTS2^a_{syn}$ ,  $pTS2^a_{iso}$ ,  $oTS2^a_{syn}$ ,  $oTS2^a_{iso}$ ,  $mTS2^a_{syn}$ , and  $mTS2^a_{iso}$ .

The results suggest that the related distances of  $d_{(H\cdots O)}$  are too long to have noncovalent interactions ( $d_{(H\cdots O)} > 3.2 \text{ \AA}$ , being longer than the sum of the Van der Waals radius of the O and H atoms ( $2.70 \text{ \AA}$ , see <https://www.webelements.com/>)) in all transition states. Besides, the NCI analysis also shows that there is no C–H $\cdots$ O noncovalent interactions between the O atom of the THF and H atoms of the phenyl ring of monomer units. Therefore, it is the C–H $\cdots$  $\pi$  interactions that are the source of the stereoselectivity in these systems.

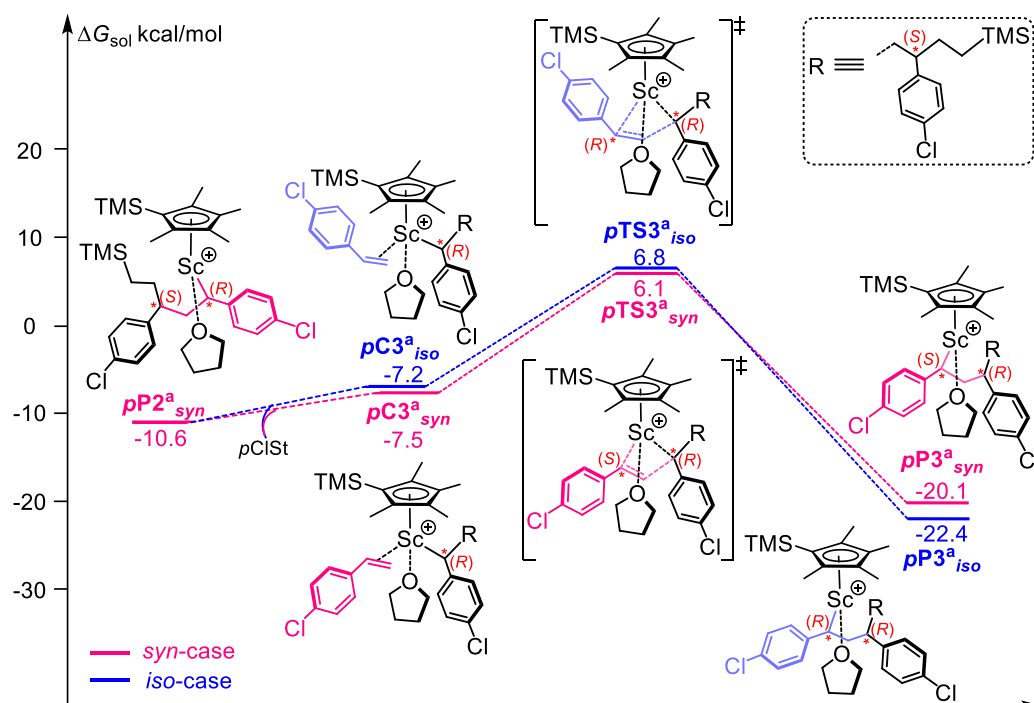

**Fig. S12** Computed energy profiles ( $\text{kcal mol}^{-1}$ ) for a mediated C=C insertion of the third molecules of  $pClSt$  based on  $pP2^a_{syn}$ . The syndiotactic polymerization pathway is in pink and the isospecific one is in blue.

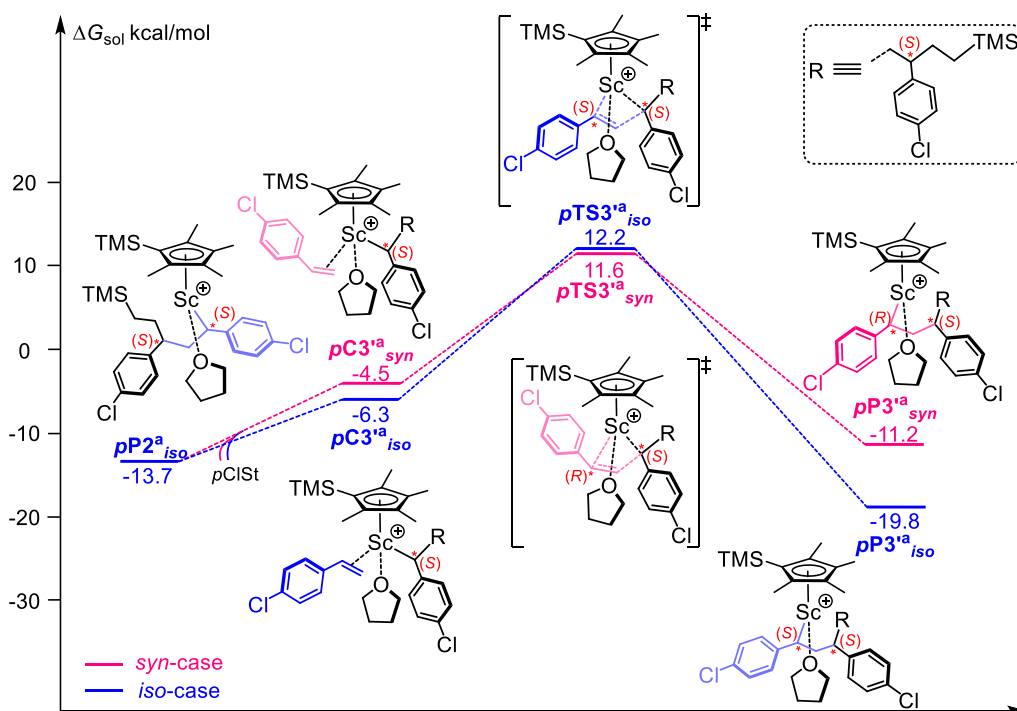

**Fig. S13** Computed energy profiles (kcal mol<sup>-1</sup>) for a mediated C=C insertion of the third molecule of *pClSt* based on *pP2*<sup>a</sup><sub>iso</sub>. The syndiotactic polymerization pathway is in pink and the isospecific one is in blue.

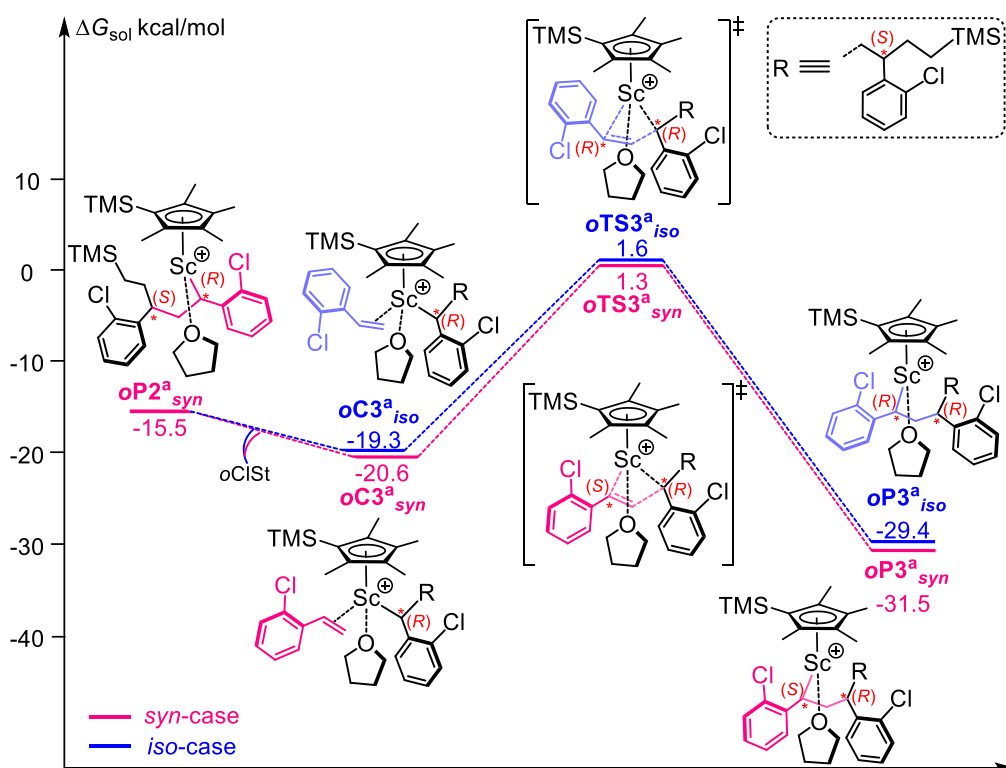

**Fig. S14** Computed energy profiles (kcal mol<sup>-1</sup>) for a mediated C=C insertion of the third molecule of *oClSt* based on *oP2*<sup>a</sup><sub>syn</sub>. The syndiotactic polymerization pathway is in pink and the isospecific one is in blue.

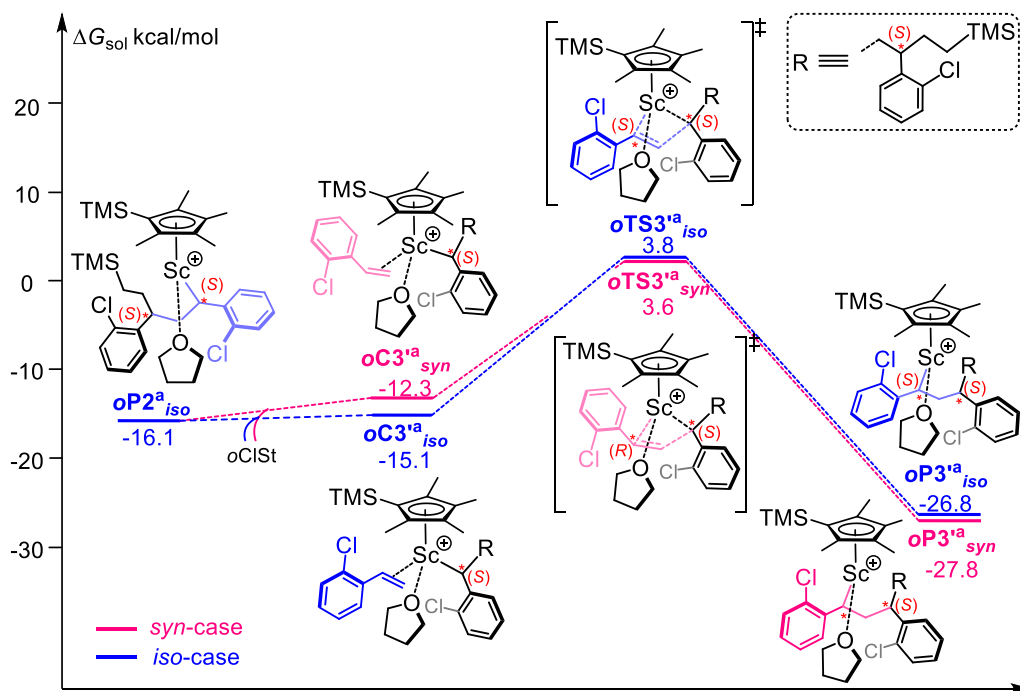

**Fig. S15** Computed energy profiles (kcal mol<sup>-1</sup>) for a mediated C=C insertion of the third molecule of *oClSt* based on *oP2<sup>a</sup><sub>iso</sub>*. The syndiotactic polymerization pathway is in pink and the isospecific one is in blue.

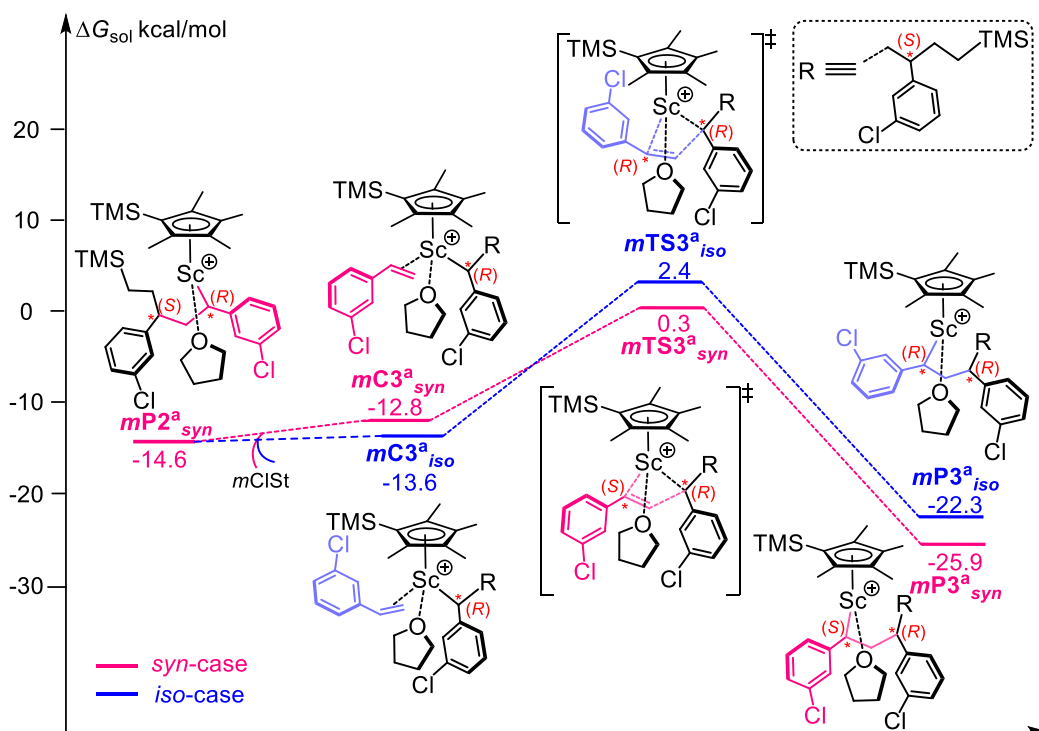

**Fig. S16** Computed energy profiles (kcal mol<sup>-1</sup>) for a mediated C=C insertion of the third molecule of *mClSt* based on *mP2<sup>a</sup><sub>syn</sub>*. The syndiotactic polymerization pathway is in pink and the isospecific one is in blue.

**Cartesian coordinates and single-point energies ( $E_{(\text{SCF Done})}$ , a.u.) obtained at the level of M06(SMD, chlorobenzene)/6-311+G(d,p)-SDD//B3PW91/6-31G(d)-SDD for all of the stationary points as well as the imaginary frequency (IF,  $\text{cm}^{-1}$ ) of transition states.**

THF,  $E_{(\text{SCF Done})} = -232.3554321$  a.u.

|   |              |              |              |
|---|--------------|--------------|--------------|
| C | 1.155790000  | -0.433519000 | 0.138716000  |
| O | -0.003870000 | -1.246317000 | -0.009010000 |
| C | -1.161887000 | -0.424994000 | -0.127361000 |
| C | -0.724716000 | 0.997247000  | 0.226785000  |
| C | 0.735184000  | 0.988290000  | -0.231929000 |
| H | 1.509795000  | -0.479480000 | 1.181238000  |
| H | 1.948960000  | -0.832816000 | -0.504522000 |
| H | -1.541885000 | -0.475731000 | -1.159935000 |
| H | -1.942159000 | -0.814053000 | 0.538077000  |
| H | -1.334056000 | 1.764065000  | -0.261751000 |
| H | -0.781092000 | 1.157313000  | 1.310499000  |
| H | 0.794021000  | 1.134271000  | -1.317499000 |
| H | 1.351162000  | 1.754826000  | 0.248707000  |

**a**,  $E_{(\text{SCF Done})} = -1486.73266$  a.u.

|    |              |              |              |
|----|--------------|--------------|--------------|
| Sc | 0.292665000  | -0.284660000 | -0.123600000 |
| Si | -3.392395000 | 0.707935000  | -0.433727000 |
| Si | 1.750527000  | 3.023138000  | 0.112079000  |
| O  | 2.299292000  | -1.245732000 | -0.326300000 |
| C  | -1.577815000 | -0.811857000 | 1.394523000  |
| C  | -0.830815000 | -2.019362000 | 1.378022000  |
| C  | -0.860553000 | -2.543423000 | 0.054535000  |
| C  | -1.622140000 | -1.660235000 | -0.758704000 |
| C  | -2.089349000 | -0.572256000 | 0.068881000  |
| C  | -1.868828000 | -0.020062000 | 2.640206000  |
| H  | -1.758996000 | 1.057412000  | 2.491314000  |
| H  | -1.194461000 | -0.306178000 | 3.454044000  |
| H  | -2.894676000 | -0.196943000 | 2.996192000  |
| C  | -0.195887000 | -2.661038000 | 2.580133000  |
| H  | -0.950750000 | -3.119581000 | 3.233952000  |
| H  | 0.359599000  | -1.938840000 | 3.192056000  |
| H  | 0.499578000  | -3.459952000 | 2.299802000  |
| C  | -0.243676000 | -3.832581000 | -0.409721000 |
| H  | 0.544572000  | -4.181361000 | 0.266976000  |
| H  | 0.201519000  | -3.739172000 | -1.408297000 |
| H  | -0.988775000 | -4.638190000 | -0.468610000 |
| C  | -2.009581000 | -1.945728000 | -2.183996000 |

|   |              |              |              |
|---|--------------|--------------|--------------|
| H | -1.300610000 | -2.633210000 | -2.658571000 |
| H | -2.042245000 | -1.040878000 | -2.795775000 |
| H | -3.001876000 | -2.418874000 | -2.244585000 |
| C | -3.383637000 | 2.254931000  | 0.671689000  |
| H | -3.721605000 | 2.041778000  | 1.690463000  |
| H | -4.070569000 | 2.995881000  | 0.243850000  |
| H | -2.390895000 | 2.714803000  | 0.726986000  |
| C | -3.189958000 | 1.321990000  | -2.225330000 |
| H | -2.149212000 | 1.575259000  | -2.456099000 |
| H | -3.791651000 | 2.229673000  | -2.359135000 |
| H | -3.537866000 | 0.588771000  | -2.959956000 |
| C | -5.109941000 | -0.099937000 | -0.282704000 |
| H | -5.189828000 | -0.979667000 | -0.931500000 |
| H | -5.903143000 | 0.602784000  | -0.566487000 |
| H | -5.299215000 | -0.427479000 | 0.746052000  |
| C | 0.690943000  | 1.814590000  | -0.843604000 |
| H | 1.104786000  | 1.727696000  | -1.867465000 |
| H | -0.300230000 | 2.285511000  | -0.971544000 |
| C | 1.939278000  | 4.718913000  | -0.749764000 |
| H | 2.396555000  | 4.605989000  | -1.740540000 |
| H | 2.564623000  | 5.407041000  | -0.166685000 |
| H | 0.960222000  | 5.192623000  | -0.891259000 |
| C | 3.522720000  | 2.341105000  | 0.346770000  |
| H | 3.510512000  | 1.415650000  | 0.936088000  |
| H | 4.162070000  | 3.061564000  | 0.871282000  |
| H | 3.994461000  | 2.125394000  | -0.620690000 |
| C | 1.027191000  | 3.348780000  | 1.845437000  |
| H | 0.012013000  | 3.758413000  | 1.775134000  |
| H | 1.636005000  | 4.066309000  | 2.409357000  |
| H | 0.970811000  | 2.418975000  | 2.424982000  |
| C | 3.105154000  | -1.853863000 | 0.715426000  |
| H | 2.491550000  | -2.604875000 | 1.216934000  |
| H | 3.381316000  | -1.073638000 | 1.433293000  |
| C | 4.321113000  | -2.420124000 | -0.004697000 |
| H | 4.106964000  | -3.423322000 | -0.391230000 |
| H | 5.192926000  | -2.485039000 | 0.652595000  |
| C | 4.504518000  | -1.426756000 | -1.155169000 |
| H | 4.999283000  | -0.515740000 | -0.801169000 |
| H | 5.085347000  | -1.833378000 | -1.988037000 |
| C | 3.066406000  | -1.127261000 | -1.556170000 |
| H | 2.912423000  | -0.120329000 | -1.950205000 |
| H | 2.674468000  | -1.861158000 | -2.269017000 |

**pCISt**,  $E_{(\text{SCF Done})} = -769.0748779$  a.u.

|    |              |              |              |
|----|--------------|--------------|--------------|
| C  | -1.364794000 | -0.014528000 | 0.000005000  |
| C  | -0.785210000 | 1.250693000  | -0.000061000 |
| C  | 0.602259000  | 1.357812000  | 0.000012000  |
| C  | 1.430503000  | 0.225132000  | 0.000123000  |
| C  | 0.811155000  | -1.036075000 | 0.000220000  |
| C  | -0.571680000 | -1.162574000 | 0.000155000  |
| H  | -1.411094000 | 2.137324000  | -0.000155000 |
| H  | 1.054454000  | 2.347172000  | -0.000039000 |
| H  | 1.416167000  | -1.938228000 | 0.000397000  |
| H  | -1.037484000 | -2.142953000 | 0.000245000  |
| C  | 2.887371000  | 0.408400000  | 0.000144000  |
| C  | 3.829024000  | -0.542828000 | -0.000388000 |
| H  | 3.211955000  | 1.449367000  | 0.000614000  |
| H  | 4.883041000  | -0.281583000 | -0.000298000 |
| H  | 3.598085000  | -1.605120000 | -0.000943000 |
| Cl | -3.102758000 | -0.169540000 | -0.000064000 |

**pC1<sup>a</sup>**,  $E_{(\text{SCF Done})} = -2255.829318$  a.u.

|    |              |              |              |
|----|--------------|--------------|--------------|
| Sc | 0.768090000  | 0.009751000  | 0.301975000  |
| Si | 1.233247000  | 3.703022000  | 0.155797000  |
| C  | 1.785184000  | 1.899480000  | -0.066680000 |
| C  | 1.009259000  | 4.111749000  | 1.998788000  |
| C  | -0.387304000 | 4.075068000  | -0.781517000 |
| C  | 2.557475000  | 4.872209000  | -0.541057000 |
| C  | 1.108450000  | -1.144931000 | 3.710245000  |
| C  | 1.485106000  | -1.359836000 | 2.270976000  |
| C  | 2.641341000  | -0.820662000 | 1.638804000  |
| C  | 2.743101000  | -1.372793000 | 0.315099000  |
| C  | 1.639591000  | -2.290413000 | 0.172861000  |
| C  | 0.871112000  | -2.278392000 | 1.364109000  |
| C  | 3.624688000  | 0.070710000  | 2.342044000  |
| C  | 1.406081000  | -3.249083000 | -0.961067000 |
| C  | -0.278525000 | -3.199683000 | 1.665102000  |
| C  | -1.066845000 | 1.024766000  | 1.787233000  |
| C  | -1.984078000 | 0.032817000  | 1.902582000  |
| H  | 2.754902000  | 1.853241000  | 0.453495000  |
| H  | 2.047847000  | 1.797696000  | -1.139268000 |
| H  | 0.175649000  | 3.577190000  | 2.467914000  |
| H  | 0.820272000  | 5.184019000  | 2.126869000  |
| H  | 1.920760000  | 3.873297000  | 2.560207000  |
| H  | -0.233312000 | 4.011398000  | -1.865889000 |
| H  | -0.719939000 | 5.097580000  | -0.567067000 |
| H  | -1.214697000 | 3.403515000  | -0.518795000 |
| H  | 3.510494000  | 4.744047000  | -0.014725000 |

|    |              |              |              |
|----|--------------|--------------|--------------|
| H  | 2.256108000  | 5.921141000  | -0.434437000 |
| H  | 2.736829000  | 4.682353000  | -1.605916000 |
| H  | 1.318934000  | -0.126184000 | 4.052728000  |
| H  | 1.685802000  | -1.817033000 | 4.358834000  |
| H  | 0.051771000  | -1.350976000 | 3.908652000  |
| H  | 3.134163000  | 0.750325000  | 3.046915000  |
| H  | 4.208207000  | 0.676324000  | 1.648887000  |
| H  | 4.333053000  | -0.533388000 | 2.925036000  |
| H  | 2.039407000  | -4.137725000 | -0.842989000 |
| H  | 1.638765000  | -2.819989000 | -1.939800000 |
| H  | 0.372395000  | -3.608600000 | -0.983237000 |
| H  | -1.056721000 | -3.187949000 | 0.891823000  |
| H  | -0.753226000 | -2.961711000 | 2.621501000  |
| H  | 0.072525000  | -4.236855000 | 1.740752000  |
| H  | -1.245334000 | 1.924862000  | 1.204355000  |
| H  | -0.214531000 | 1.050832000  | 2.469245000  |
| H  | -1.744979000 | -0.795091000 | 2.568630000  |
| C  | -1.453903000 | -1.162288000 | -1.812705000 |
| O  | -0.381326000 | -0.204647000 | -1.538945000 |
| C  | -0.165457000 | 0.642945000  | -2.725431000 |
| C  | -1.057023000 | 0.051304000  | -3.807056000 |
| C  | -2.194376000 | -0.580709000 | -3.002167000 |
| H  | -0.991404000 | -2.124820000 | -2.047928000 |
| H  | -2.059873000 | -1.248598000 | -0.908798000 |
| H  | -0.454081000 | 1.659445000  | -2.449654000 |
| H  | 0.898175000  | 0.613440000  | -2.965236000 |
| H  | -1.400938000 | 0.817855000  | -4.506619000 |
| H  | -0.518786000 | -0.712673000 | -4.378795000 |
| H  | -2.912546000 | 0.178246000  | -2.673293000 |
| H  | -2.737641000 | -1.349362000 | -3.558499000 |
| C  | -3.856330000 | 0.988098000  | 0.512568000  |
| C  | -3.289866000 | -0.062405000 | 1.260483000  |
| C  | -4.037485000 | -1.242510000 | 1.425504000  |
| C  | -5.294282000 | -1.388138000 | 0.851602000  |
| C  | -5.825258000 | -0.335601000 | 0.104740000  |
| C  | -5.111373000 | 0.857040000  | -0.062166000 |
| H  | -3.325952000 | 1.929425000  | 0.399829000  |
| H  | -3.629813000 | -2.057203000 | 2.019420000  |
| H  | -5.865283000 | -2.300726000 | 0.987055000  |
| H  | -5.551554000 | 1.674628000  | -0.623880000 |
| Cl | -7.389050000 | -0.498211000 | -0.613149000 |
| Si | 4.190711000  | -1.253471000 | -0.940576000 |
| C  | 5.541081000  | -0.025361000 | -0.440539000 |
| H  | 6.021870000  | -0.284586000 | 0.507720000  |

|   |             |              |              |
|---|-------------|--------------|--------------|
| H | 6.315551000 | -0.054020000 | -1.217185000 |
| H | 5.178941000 | 1.006534000  | -0.381921000 |
| C | 4.980489000 | -2.972361000 | -1.065668000 |
| H | 4.307240000 | -3.721388000 | -1.494014000 |
| H | 5.868780000 | -2.921637000 | -1.706536000 |
| H | 5.300359000 | -3.328558000 | -0.080088000 |
| C | 3.579934000 | -0.705905000 | -2.658085000 |
| H | 2.754263000 | -1.308299000 | -3.051408000 |
| H | 3.273814000 | 0.346709000  | -2.642730000 |
| H | 4.408184000 | -0.789168000 | -3.372260000 |

***p*TS1<sup>a</sup>**,  $E_{(\text{SCF Done})} = -2255.818962$  a.u.  $\text{IF} = i194.18$   $\text{cm}^{-1}$

|    |              |              |              |
|----|--------------|--------------|--------------|
| Sc | 0.272987000  | -0.176721000 | 0.360955000  |
| Si | 1.452510000  | 3.643715000  | -0.419184000 |
| C  | 0.875237000  | 1.824108000  | -0.271002000 |
| C  | 2.362643000  | 4.210279000  | 1.140885000  |
| C  | -0.069343000 | 4.736790000  | -0.724011000 |
| C  | 2.605641000  | 3.786024000  | -1.917079000 |
| C  | 0.903725000  | -0.900579000 | 3.859069000  |
| C  | 1.232315000  | -1.210863000 | 2.427115000  |
| C  | 2.289783000  | -0.627459000 | 1.678446000  |
| C  | 2.409362000  | -1.325550000 | 0.423464000  |
| C  | 1.401609000  | -2.354045000 | 0.435040000  |
| C  | 0.670069000  | -2.270642000 | 1.651489000  |
| C  | 3.190141000  | 0.449022000  | 2.215977000  |
| C  | 1.232187000  | -3.446937000 | -0.582615000 |
| C  | -0.401695000 | -3.219535000 | 2.108322000  |
| C  | -0.469458000 | 1.920385000  | 1.664682000  |
| C  | -1.278715000 | 0.819117000  | 1.897801000  |
| H  | 1.773695000  | 1.182571000  | -0.452016000 |
| H  | 0.169651000  | 1.668191000  | -1.113047000 |
| H  | 1.722785000  | 4.190912000  | 2.029743000  |
| H  | 2.703306000  | 5.243809000  | 1.007288000  |
| H  | 3.247391000  | 3.597354000  | 1.342932000  |
| H  | -0.643776000 | 4.393961000  | -1.593080000 |
| H  | 0.258451000  | 5.761022000  | -0.937726000 |
| H  | -0.747276000 | 4.793906000  | 0.135140000  |
| H  | 3.505808000  | 3.172018000  | -1.800194000 |
| H  | 2.930436000  | 4.825225000  | -2.047350000 |
| H  | 2.104014000  | 3.478468000  | -2.841956000 |
| H  | 0.910938000  | 0.172890000  | 4.079020000  |
| H  | 1.646065000  | -1.361303000 | 4.523799000  |
| H  | -0.071656000 | -1.297896000 | 4.157288000  |
| H  | 2.683811000  | 1.061344000  | 2.969178000  |



|    |               |               |               |
|----|---------------|---------------|---------------|
| H  | 3. 555864000  | 1. 117740000  | 1. 435285000  |
| H  | 4. 069225000  | 0. 009663000  | 2. 706096000  |
| H  | 1. 898844000  | -4. 287318000 | -0. 350052000 |
| H  | 1. 470246000  | -3. 119654000 | -1. 598359000 |
| H  | 0. 216526000  | -3. 854749000 | -0. 588956000 |
| H  | -0. 998666000 | -3. 608102000 | 1. 276654000  |
| H  | -1. 091943000 | -2. 754578000 | 2. 819540000  |
| H  | 0. 039460000  | -4. 087905000 | 2. 615338000  |
| H  | -0. 850359000 | 2. 792532000  | 1. 147001000  |
| H  | 0. 379364000  | 2. 107288000  | 2. 314004000  |
| H  | -1. 045684000 | 0. 189345000  | 2. 752730000  |
| C  | -2. 024541000 | -1. 762468000 | -1. 365761000 |
| O  | -0. 879765000 | -0. 843027000 | -1. 393605000 |
| C  | -0. 616226000 | -0. 430575000 | -2. 773439000 |
| C  | -1. 372376000 | -1. 429104000 | -3. 631000000 |
| C  | -2. 603744000 | -1. 721408000 | -2. 770973000 |
| H  | -1. 638967000 | -2. 752831000 | -1. 108466000 |
| H  | -2. 710873000 | -1. 415479000 | -0. 592036000 |
| H  | -1. 002493000 | 0. 587476000  | -2. 897064000 |
| H  | 0. 464835000  | -0. 436026000 | -2. 921164000 |
| H  | -1. 621413000 | -1. 015484000 | -4. 611957000 |
| H  | -0. 777296000 | -2. 336522000 | -3. 782199000 |
| H  | -3. 339400000 | -0. 915044000 | -2. 858791000 |
| H  | -3. 096169000 | -2. 661746000 | -3. 032624000 |
| C  | -3. 066321000 | 1. 368137000  | 0. 192908000  |
| C  | -2. 598056000 | 0. 608395000  | 1. 282511000  |
| C  | -3. 457172000 | -0. 376791000 | 1. 806619000  |
| C  | -4. 727041000 | -0. 591558000 | 1. 282153000  |
| C  | -5. 162243000 | 0. 178692000  | 0. 202565000  |
| C  | -4. 333465000 | 1. 161447000  | -0. 342086000 |
| H  | -2. 444076000 | 2. 148260000  | -0. 238375000 |
| H  | -3. 135087000 | -0. 965545000 | 2. 662491000  |
| H  | -5. 382135000 | -1. 342478000 | 1. 712291000  |
| H  | -4. 687110000 | 1. 767734000  | -1. 170307000 |
| Cl | -6. 742261000 | -0. 082483000 | -0. 464317000 |
| Si | 3. 853897000  | -1. 261110000 | -0. 837905000 |
| C  | 5. 100175000  | 0. 118337000  | -0. 471093000 |
| H  | 5. 561904000  | 0. 019282000  | 0. 515797000  |
| H  | 5. 901897000  | 0. 044632000  | -1. 216341000 |
| H  | 4. 673732000  | 1. 123825000  | -0. 555078000 |
| C  | 4. 772009000  | -2. 915185000 | -0. 744691000 |
| H  | 4. 151973000  | -3. 760369000 | -1. 058849000 |
| H  | 5. 650436000  | -2. 886351000 | -1. 400119000 |
| H  | 5. 121625000  | -3. 112295000 | 0. 274788000  |

|   |             |              |              |
|---|-------------|--------------|--------------|
| C | 3.246718000 | -0.973580000 | -2.617753000 |
| H | 2.534908000 | -1.729601000 | -2.965891000 |
| H | 2.794606000 | 0.018898000  | -2.734166000 |
| H | 4.109408000 | -1.012685000 | -3.294072000 |

**pP1<sup>a</sup>**,  $E_{(\text{SCF Done})} = -2255.853597$  a.u.

|    |              |              |              |
|----|--------------|--------------|--------------|
| Sc | 0.217575000  | -0.771272000 | -0.351399000 |
| Si | -1.366671000 | 4.412233000  | -0.248180000 |
| C  | -0.616249000 | 2.646386000  | -0.379836000 |
| C  | -2.820221000 | 4.572341000  | -1.452247000 |
| C  | -0.029795000 | 5.692679000  | -0.655610000 |
| C  | -1.965483000 | 4.655180000  | 1.535266000  |
| C  | 0.030341000  | -2.642413000 | -3.408649000 |
| C  | -0.479116000 | -2.492396000 | -2.004706000 |
| C  | -1.621157000 | -1.744353000 | -1.621813000 |
| C  | -1.865174000 | -1.953803000 | -0.212949000 |
| C  | -0.841546000 | -2.858316000 | 0.245109000  |
| C  | 0.017325000  | -3.170104000 | -0.847713000 |
| C  | -2.481688000 | -0.980618000 | -2.587891000 |
| C  | -0.703427000 | -3.466124000 | 1.613282000  |
| C  | 1.160091000  | -4.146044000 | -0.822004000 |
| C  | -0.125877000 | 2.239255000  | -1.781730000 |
| C  | 0.544520000  | 0.874637000  | -1.867074000 |
| H  | -1.392673000 | 1.941240000  | -0.038422000 |
| H  | 0.204773000  | 2.590105000  | 0.351799000  |
| H  | -2.500817000 | 4.445634000  | -2.492772000 |
| H  | -3.278387000 | 5.564574000  | -1.368732000 |
| H  | -3.599960000 | 3.830654000  | -1.243123000 |
| H  | 0.817677000  | 5.626059000  | 0.037011000  |
| H  | -0.439393000 | 6.706298000  | -0.575361000 |
| H  | 0.354079000  | 5.575913000  | -1.675383000 |
| H  | -2.745692000 | 3.932362000  | 1.801536000  |
| H  | -2.389688000 | 5.657394000  | 1.665493000  |
| H  | -1.143748000 | 4.553696000  | 2.254557000  |
| H  | -0.010388000 | -1.704796000 | -3.973615000 |
| H  | -0.584616000 | -3.368198000 | -3.956908000 |
| H  | 1.059324000  | -3.014019000 | -3.445702000 |
| H  | -1.885737000 | -0.465963000 | -3.348913000 |
| H  | -3.101317000 | -0.230266000 | -2.091625000 |
| H  | -3.157714000 | -1.662220000 | -3.120700000 |
| H  | -1.296023000 | -4.387199000 | 1.688216000  |
| H  | -1.047475000 | -2.799607000 | 2.406832000  |
| H  | 0.332703000  | -3.746020000 | 1.831824000  |
| H  | 1.690115000  | -4.149896000 | 0.136444000  |

|    |              |              |              |
|----|--------------|--------------|--------------|
| H  | 1.896749000  | -3.943747000 | -1.605814000 |
| H  | 0.795449000  | -5.168592000 | -0.985883000 |
| H  | 0.544436000  | 3.019206000  | -2.176915000 |
| H  | -0.986903000 | 2.232237000  | -2.460159000 |
| H  | 0.344391000  | 0.345450000  | -2.805309000 |
| C  | 1.944965000  | -0.598081000 | 2.346334000  |
| O  | 0.657077000  | -0.270155000 | 1.722666000  |
| C  | -0.249272000 | 0.300628000  | 2.723528000  |
| C  | 0.440444000  | 0.070851000  | 4.058827000  |
| C  | 1.922599000  | 0.126166000  | 3.680951000  |
| H  | 1.986427000  | -1.685711000 | 2.468573000  |
| H  | 2.731535000  | -0.266226000 | 1.667046000  |
| H  | -0.364632000 | 1.362949000  | 2.490086000  |
| H  | -1.211646000 | -0.205307000 | 2.624705000  |
| H  | 0.157688000  | 0.828182000  | 4.794797000  |
| H  | 0.181568000  | -0.913215000 | 4.464688000  |
| H  | 2.256679000  | 1.162671000  | 3.561249000  |
| H  | 2.570154000  | -0.358963000 | 4.416012000  |
| C  | 2.683129000  | 1.663263000  | -0.726952000 |
| C  | 1.917694000  | 0.692686000  | -1.430792000 |
| C  | 2.491795000  | -0.611348000 | -1.516248000 |
| C  | 3.759729000  | -0.911124000 | -0.988949000 |
| C  | 4.477098000  | 0.079058000  | -0.336537000 |
| C  | 3.936642000  | 1.371911000  | -0.216777000 |
| H  | 2.305151000  | 2.677227000  | -0.640214000 |
| H  | 2.023712000  | -1.351292000 | -2.168749000 |
| H  | 4.189711000  | -1.899116000 | -1.123113000 |
| H  | 4.520213000  | 2.148050000  | 0.270124000  |
| Cl | 6.047801000  | -0.261230000 | 0.319895000  |
| Si | -3.534661000 | -1.512801000 | 0.628869000  |
| C  | -3.846806000 | 0.360822000  | 0.697655000  |
| H  | -3.772980000 | 0.848691000  | -0.279404000 |
| H  | -4.863557000 | 0.533564000  | 1.071370000  |
| H  | -3.161466000 | 0.871213000  | 1.384271000  |
| C  | -4.900860000 | -2.350165000 | -0.379378000 |
| H  | -5.868114000 | -2.203215000 | 0.115644000  |
| H  | -4.983404000 | -1.949217000 | -1.394094000 |
| H  | -4.723937000 | -3.428824000 | -0.454731000 |
| C  | -3.662828000 | -2.164329000 | 2.406055000  |
| H  | -3.541574000 | -3.250392000 | 2.463043000  |
| H  | -2.959406000 | -1.703438000 | 3.108292000  |
| H  | -4.672164000 | -1.930998000 | 2.767306000  |

$pC2^a_{syn}$ ,  $E_{(SCF Done)} = -3024.924855$  a.u.

|    |              |              |              |
|----|--------------|--------------|--------------|
| Sc | -0.196073000 | -1.021203000 | -0.575308000 |
| Si | -4.204743000 | 0.028614000  | 3.662716000  |
| C  | -3.212568000 | 0.342811000  | 2.050847000  |
| C  | -3.381800000 | -1.359206000 | 4.665332000  |
| C  | -5.988758000 | -0.454022000 | 3.241345000  |
| C  | -4.187594000 | 1.637235000  | 4.665884000  |
| C  | -2.134307000 | -4.044965000 | -0.234914000 |
| C  | -0.803974000 | -3.434897000 | -0.557665000 |
| C  | 0.281642000  | -3.266828000 | 0.340978000  |
| C  | 1.452748000  | -2.868745000 | -0.404877000 |
| C  | 1.040896000  | -2.782129000 | -1.778045000 |
| C  | -0.342618000 | -3.100808000 | -1.867777000 |
| C  | 0.201320000  | -3.599861000 | 1.806238000  |
| C  | 1.922007000  | -2.535370000 | -2.970344000 |
| C  | -1.145841000 | -3.217792000 | -3.131836000 |
| C  | -3.109038000 | -0.863088000 | 1.112928000  |
| C  | -2.387151000 | -0.709644000 | -0.261857000 |
| H  | -2.222079000 | 0.708666000  | 2.358671000  |
| H  | -3.704274000 | 1.180399000  | 1.538464000  |
| H  | -3.391136000 | -2.313013000 | 4.124787000  |
| H  | -3.913491000 | -1.515620000 | 5.611048000  |
| H  | -2.340879000 | -1.115385000 | 4.910664000  |
| H  | -6.482568000 | 0.325857000  | 2.650199000  |
| H  | -6.573766000 | -0.595908000 | 4.157399000  |
| H  | -6.036230000 | -1.389205000 | 2.671805000  |
| H  | -3.165888000 | 1.939518000  | 4.924660000  |
| H  | -4.744888000 | 1.517672000  | 5.602020000  |
| H  | -4.651190000 | 2.458707000  | 4.107389000  |
| H  | -2.501631000 | -3.764438000 | 0.755937000  |
| H  | -2.053936000 | -5.140196000 | -0.251502000 |
| H  | -2.903632000 | -3.771376000 | -0.963249000 |
| H  | -0.803799000 | -3.428440000 | 2.205555000  |
| H  | 0.905355000  | -3.022113000 | 2.409740000  |
| H  | 0.428667000  | -4.660360000 | 1.978291000  |
| H  | 2.182715000  | -3.483916000 | -3.457815000 |
| H  | 2.859671000  | -2.044737000 | -2.698759000 |
| H  | 1.432956000  | -1.919085000 | -3.732630000 |
| H  | -0.720307000 | -2.626828000 | -3.949062000 |
| H  | -2.185773000 | -2.901383000 | -2.997063000 |
| H  | -1.172815000 | -4.260484000 | -3.475547000 |
| H  | -4.135476000 | -1.203722000 | 0.907392000  |
| H  | -2.635980000 | -1.694854000 | 1.655295000  |
| H  | -2.740740000 | -1.563345000 | -0.860874000 |
| C  | 0.069806000  | 0.938380000  | -3.210102000 |

|    |              |              |              |
|----|--------------|--------------|--------------|
| O  | 0.655187000  | 0.445140000  | -1.955658000 |
| C  | 2.035545000  | 0.917314000  | -1.837047000 |
| C  | 2.401839000  | 1.423240000  | -3.221380000 |
| C  | 1.063457000  | 1.963155000  | -3.730453000 |
| H  | -0.029471000 | 0.080221000  | -3.882708000 |
| H  | -0.913901000 | 1.343418000  | -2.977567000 |
| H  | 2.048375000  | 1.717540000  | -1.091246000 |
| H  | 2.642400000  | 0.080504000  | -1.486531000 |
| H  | 3.184824000  | 2.185388000  | -3.180187000 |
| H  | 2.756257000  | 0.601852000  | -3.853821000 |
| H  | 0.854624000  | 2.949713000  | -3.302562000 |
| H  | 1.021776000  | 2.050056000  | -4.819456000 |
| C  | -2.351407000 | 1.818533000  | -0.678204000 |
| C  | -2.703025000 | 0.507863000  | -1.070673000 |
| C  | -3.353888000 | 0.389907000  | -2.318756000 |
| C  | -3.638860000 | 1.489893000  | -3.123245000 |
| C  | -3.275715000 | 2.765676000  | -2.692326000 |
| C  | -2.635414000 | 2.932840000  | -1.464529000 |
| H  | -1.867574000 | 1.980097000  | 0.280787000  |
| H  | -3.673522000 | -0.594749000 | -2.654326000 |
| H  | -4.155121000 | 1.363079000  | -4.069990000 |
| H  | -2.369810000 | 3.929831000  | -1.125738000 |
| C  | 3.861045000  | 1.412741000  | 2.111184000  |
| C  | 2.484313000  | 1.497269000  | 1.835007000  |
| C  | 1.932942000  | 2.768056000  | 1.578147000  |
| C  | 2.727552000  | 3.903430000  | 1.577208000  |
| C  | 4.097647000  | 3.785931000  | 1.841706000  |
| C  | 4.668997000  | 2.542604000  | 2.114261000  |
| H  | 4.304365000  | 0.445731000  | 2.335683000  |
| H  | 0.867637000  | 2.877990000  | 1.396022000  |
| H  | 2.297259000  | 4.881571000  | 1.388321000  |
| H  | 5.729251000  | 2.467422000  | 2.331743000  |
| C  | 1.690206000  | 0.277580000  | 1.870466000  |
| C  | 0.366006000  | 0.134936000  | 1.612279000  |
| H  | 2.237914000  | -0.613972000 | 2.173663000  |
| H  | -0.136653000 | -0.790927000 | 1.905080000  |
| H  | -0.276722000 | 0.986271000  | 1.402010000  |
| Si | 3.279922000  | -3.126183000 | 0.114483000  |
| C  | 3.513202000  | -3.416254000 | 1.976393000  |
| H  | 3.220259000  | -2.575779000 | 2.615304000  |
| H  | 2.982867000  | -4.306805000 | 2.326519000  |
| H  | 4.583156000  | -3.590314000 | 2.146344000  |
| C  | 4.450332000  | -1.701291000 | -0.359369000 |
| H  | 4.548893000  | -1.557347000 | -1.440441000 |

|    |              |              |              |
|----|--------------|--------------|--------------|
| H  | 4.166121000  | -0.743905000 | 0.090940000  |
| H  | 5.451266000  | -1.950008000 | 0.015074000  |
| C  | 3.858973000  | -4.698083000 | -0.770814000 |
| H  | 3.848094000  | -4.587692000 | -1.860019000 |
| H  | 4.883962000  | -4.946481000 | -0.471161000 |
| H  | 3.218041000  | -5.548446000 | -0.512864000 |
| Cl | 5.087124000  | 5.202533000  | 1.841613000  |
| Cl | -3.624831000 | 4.151642000  | -3.683476000 |

***p*TS2<sup>a</sup><sub>syn</sub>,  $E_{(\text{SCF Done})} = -3024.913664$  a.u.  $\text{IF} = i170.63 \text{ cm}^{-1}$**

|    |              |              |              |
|----|--------------|--------------|--------------|
| Sc | -0.469959000 | -0.914313000 | 0.237279000  |
| Si | 5.787949000  | -0.816589000 | -1.638020000 |
| C  | 4.136367000  | -0.173551000 | -0.888285000 |
| C  | 5.418943000  | -1.879645000 | -3.165253000 |
| C  | 6.710054000  | -1.843541000 | -0.338196000 |
| C  | 6.816714000  | 0.695683000  | -2.126361000 |
| C  | 0.876163000  | -4.154270000 | -0.643475000 |
| C  | -0.321425000 | -3.399274000 | -0.145692000 |
| C  | -1.400090000 | -2.933795000 | -0.943061000 |
| C  | -2.433006000 | -2.422883000 | -0.081686000 |
| C  | -1.967928000 | -2.626808000 | 1.265803000  |
| C  | -0.668699000 | -3.201928000 | 1.225056000  |
| C  | -1.475941000 | -3.172300000 | -2.424869000 |
| C  | -2.792225000 | -2.546853000 | 2.520936000  |
| C  | 0.102297000  | -3.715751000 | 2.407812000  |
| C  | 3.174483000  | -1.283572000 | -0.457641000 |
| C  | 1.820849000  | -0.901080000 | 0.173534000  |
| H  | 3.686227000  | 0.491866000  | -1.638985000 |
| H  | 4.400792000  | 0.460046000  | -0.031206000 |
| H  | 4.849635000  | -2.780973000 | -2.909877000 |
| H  | 6.353571000  | -2.207549000 | -3.634849000 |
| H  | 4.851600000  | -1.320239000 | -3.918385000 |
| H  | 6.901260000  | -1.261079000 | 0.570584000  |
| H  | 7.680240000  | -2.168974000 | -0.731130000 |
| H  | 6.155393000  | -2.744879000 | -0.052629000 |
| H  | 6.302666000  | 1.308440000  | -2.875898000 |
| H  | 7.776804000  | 0.385929000  | -2.554597000 |
| H  | 7.030142000  | 1.330590000  | -1.258834000 |
| H  | 1.219916000  | -3.804472000 | -1.622593000 |
| H  | 0.632703000  | -5.219053000 | -0.757854000 |
| H  | 1.724520000  | -4.096886000 | 0.046222000  |
| H  | -0.501789000 | -3.075244000 | -2.916270000 |
| H  | -2.174133000 | -2.506630000 | -2.933299000 |
| H  | -1.819544000 | -4.197670000 | -2.617039000 |

|   |              |              |              |
|---|--------------|--------------|--------------|
| H | -3.187564000 | -3.543505000 | 2.758368000  |
| H | -3.652266000 | -1.881820000 | 2.418780000  |
| H | -2.215548000 | -2.226446000 | 3.394824000  |
| H | -0.110744000 | -3.151288000 | 3.321708000  |
| H | 1.185804000  | -3.697424000 | 2.245325000  |
| H | -0.165614000 | -4.760910000 | 2.613589000  |
| H | 3.697620000  | -1.907866000 | 0.282390000  |
| H | 2.977070000  | -1.950633000 | -1.307359000 |
| H | 1.447131000  | -1.842574000 | 0.635195000  |
| C | -1.546458000 | 2.132894000  | 0.991029000  |
| O | -1.415201000 | 0.724761000  | 1.402583000  |
| C | -1.847134000 | 0.593869000  | 2.793740000  |
| C | -1.911356000 | 2.009433000  | 3.336461000  |
| C | -2.336850000 | 2.802059000  | 2.101199000  |
| H | -0.535820000 | 2.537302000  | 0.896729000  |
| H | -2.042189000 | 2.150531000  | 0.021788000  |
| H | -2.828553000 | 0.116915000  | 2.789611000  |
| H | -1.125975000 | -0.045581000 | 3.306955000  |
| H | -2.619873000 | 2.090876000  | 4.165581000  |
| H | -0.928383000 | 2.336244000  | 3.690180000  |
| H | -3.413135000 | 2.697709000  | 1.924998000  |
| H | -2.104850000 | 3.868086000  | 2.173187000  |
| C | 2.130792000  | 1.503140000  | 0.957764000  |
| C | 1.838061000  | 0.147543000  | 1.229539000  |
| C | 1.608348000  | -0.200036000 | 2.578165000  |
| C | 1.671369000  | 0.743256000  | 3.604703000  |
| C | 1.977871000  | 2.065288000  | 3.296288000  |
| C | 2.211313000  | 2.447877000  | 1.970889000  |
| H | 2.320453000  | 1.815608000  | -0.063185000 |
| H | 1.449604000  | -1.244029000 | 2.840705000  |
| H | 1.518852000  | 0.447029000  | 4.638124000  |
| H | 2.459263000  | 3.480170000  | 1.743867000  |
| C | -2.238509000 | 1.673318000  | -2.500969000 |
| C | -0.894845000 | 1.390033000  | -2.191159000 |
| C | -0.006304000 | 2.477802000  | -2.129741000 |
| C | -0.437009000 | 3.782902000  | -2.339946000 |
| C | -1.780477000 | 4.030597000  | -2.624702000 |
| C | -2.684666000 | 2.972697000  | -2.716752000 |
| H | -2.949351000 | 0.855218000  | -2.588257000 |
| H | 1.048846000  | 2.311697000  | -1.934141000 |
| H | 0.266627000  | 4.608532000  | -2.297422000 |
| H | -3.723973000 | 3.166110000  | -2.963197000 |
| C | -0.484546000 | -0.011893000 | -2.008552000 |
| C | 0.830003000  | -0.457802000 | -1.878308000 |

|    |              |              |              |
|----|--------------|--------------|--------------|
| H  | -1.220271000 | -0.741010000 | -2.337538000 |
| H  | 1.066147000  | -1.481207000 | -2.153970000 |
| H  | 1.659865000  | 0.230158000  | -1.987953000 |
| Si | -4.254040000 | -2.005631000 | -0.514042000 |
| C  | -4.608058000 | -1.961027000 | -2.376895000 |
| H  | -4.029875000 | -1.213786000 | -2.931098000 |
| H  | -4.455103000 | -2.935467000 | -2.851129000 |
| H  | -5.667436000 | -1.703858000 | -2.500682000 |
| C  | -4.779233000 | -0.317404000 | 0.186269000  |
| H  | -4.716912000 | -0.262480000 | 1.278071000  |
| H  | -4.179013000 | 0.497955000  | -0.232877000 |
| H  | -5.824949000 | -0.129768000 | -0.086433000 |
| C  | -5.349333000 | -3.370897000 | 0.214532000  |
| H  | -5.315051000 | -3.412140000 | 1.307391000  |
| H  | -6.392423000 | -3.202363000 | -0.078737000 |
| H  | -5.050859000 | -4.353082000 | -0.169060000 |
| Cl | -2.323362000 | 5.659565000  | -2.880776000 |
| Cl | 2.079084000  | 3.248257000  | 4.561046000  |

**pP2<sup>a</sup>**<sub>syn</sub>,  $E_{(\text{SCF Done})} = -3024.962763$  a.u.

|    |              |              |              |
|----|--------------|--------------|--------------|
| Sc | -0.679349000 | -0.591112000 | -0.315202000 |
| Si | 6.582240000  | 0.092931000  | -0.900349000 |
| C  | 4.741616000  | 0.440953000  | -0.470884000 |
| C  | 6.817238000  | 0.147918000  | -2.781119000 |
| C  | 7.069262000  | -1.614323000 | -0.232292000 |
| C  | 7.627966000  | 1.439172000  | -0.075137000 |
| C  | 0.646862000  | -3.872073000 | -1.318789000 |
| C  | -0.492830000 | -2.892219000 | -1.335192000 |
| C  | -0.763073000 | -1.987214000 | -2.406353000 |
| C  | -2.043519000 | -1.418788000 | -2.182883000 |
| C  | -2.592615000 | -1.957953000 | -0.963385000 |
| C  | -1.605956000 | -2.869304000 | -0.447626000 |
| C  | 0.088279000  | -1.820179000 | -3.629643000 |
| C  | -2.742650000 | -0.508802000 | -3.151272000 |
| C  | -1.750126000 | -3.752405000 | 0.761405000  |
| C  | 3.758020000  | -0.592191000 | -1.018906000 |
| C  | 2.245647000  | -0.323260000 | -0.757197000 |
| H  | 4.502993000  | 1.444074000  | -0.851064000 |
| H  | 4.675456000  | 0.495367000  | 0.624938000  |
| H  | 6.229165000  | -0.621850000 | -3.294164000 |
| H  | 7.869590000  | -0.020284000 | -3.037668000 |
| H  | 6.529567000  | 1.123111000  | -3.191004000 |
| H  | 6.920860000  | -1.678727000 | 0.852081000  |
| H  | 8.128561000  | -1.812720000 | -0.432252000 |



|   |              |              |              |
|---|--------------|--------------|--------------|
| H | 6.491971000  | -2.419066000 | -0.702313000 |
| H | 7.348766000  | 2.437502000  | -0.431267000 |
| H | 8.691265000  | 1.293903000  | -0.297955000 |
| H | 7.513230000  | 1.424993000  | 1.014846000  |
| H | 1.607292000  | -3.426401000 | -1.602165000 |
| H | 0.451558000  | -4.674471000 | -2.042386000 |
| H | 0.773393000  | -4.358038000 | -0.346494000 |
| H | 1.148095000  | -2.003745000 | -3.425735000 |
| H | 0.003758000  | -0.821962000 | -4.069522000 |
| H | -0.215319000 | -2.536955000 | -4.404430000 |
| H | -2.034631000 | -0.000781000 | -3.812632000 |
| H | -3.343169000 | 0.254909000  | -2.650917000 |
| H | -3.420584000 | -1.082970000 | -3.797076000 |
| H | -2.249374000 | -3.246289000 | 1.592214000  |
| H | -0.781947000 | -4.110608000 | 1.124823000  |
| H | -2.345888000 | -4.644264000 | 0.525870000  |
| H | 4.000371000  | -1.584260000 | -0.615429000 |
| H | 3.869006000  | -0.666895000 | -2.109438000 |
| H | 1.729089000  | -1.163669000 | -1.257948000 |
| C | -1.823569000 | -0.037482000 | 2.704598000  |
| O | -1.773618000 | 0.365214000  | 1.297071000  |
| C | -2.760466000 | 1.433917000  | 1.055723000  |
| C | -3.625530000 | 1.460955000  | 2.302801000  |
| C | -2.639858000 | 1.042104000  | 3.395291000  |
| H | -2.308361000 | -1.017411000 | 2.754568000  |
| H | -0.797506000 | -0.114830000 | 3.062233000  |
| H | -2.201410000 | 2.359669000  | 0.910573000  |
| H | -3.297843000 | 1.178959000  | 0.141373000  |
| H | -4.050487000 | 2.454306000  | 2.470388000  |
| H | -4.450143000 | 0.744410000  | 2.226162000  |
| H | -1.998973000 | 1.883132000  | 3.681446000  |
| H | -3.130325000 | 0.663873000  | 4.296283000  |
| C | 2.139578000  | 0.634829000  | 1.625221000  |
| C | 1.923394000  | -0.427877000 | 0.726360000  |
| C | 1.536336000  | -1.665027000 | 1.277788000  |
| C | 1.391614000  | -1.850332000 | 2.657250000  |
| C | 1.643053000  | -0.783304000 | 3.514746000  |
| C | 2.011384000  | 0.463778000  | 2.999722000  |
| H | 2.464581000  | 1.599818000  | 1.251722000  |
| H | 1.439884000  | -2.529810000 | 0.626676000  |
| H | 1.122108000  | -2.821730000 | 3.059628000  |
| H | 2.214760000  | 1.287463000  | 3.677194000  |
| C | -1.522517000 | 2.841698000  | -1.972414000 |
| C | -0.425499000 | 2.369034000  | -1.220620000 |

|    |              |              |              |
|----|--------------|--------------|--------------|
| C  | -0.005236000 | 3.190287000  | -0.154142000 |
| C  | -0.635358000 | 4.395708000  | 0.148726000  |
| C  | -1.728712000 | 4.813598000  | -0.607780000 |
| C  | -2.172309000 | 4.035386000  | -1.676777000 |
| H  | -1.858852000 | 2.269552000  | -2.833366000 |
| H  | 0.842006000  | 2.895933000  | 0.458036000  |
| H  | -0.276311000 | 5.012825000  | 0.967016000  |
| H  | -3.004358000 | 4.375201000  | -2.286120000 |
| C  | 0.204644000  | 1.061881000  | -1.556018000 |
| C  | 1.740922000  | 0.970916000  | -1.424666000 |
| H  | -0.073817000 | 0.810940000  | -2.584909000 |
| H  | 2.198014000  | 1.017015000  | -2.422769000 |
| H  | 2.139337000  | 1.841104000  | -0.892280000 |
| Cl | -2.527814000 | 6.312065000  | -0.228548000 |
| Cl | 1.491918000  | -0.996753000 | 5.228213000  |
| Si | -4.467158000 | -2.073584000 | -0.575579000 |
| C  | -5.474912000 | -0.555131000 | -1.109514000 |
| H  | -5.506049000 | -0.440749000 | -2.196856000 |
| H  | -6.507554000 | -0.712561000 | -0.773811000 |
| H  | -5.138488000 | 0.392323000  | -0.675841000 |
| C  | -5.081876000 | -3.558024000 | -1.581691000 |
| H  | -4.563046000 | -4.479608000 | -1.295675000 |
| H  | -6.155108000 | -3.713054000 | -1.419302000 |
| H  | -4.924595000 | -3.405438000 | -2.655132000 |
| C  | -4.853048000 | -2.401979000 | 1.255306000  |
| H  | -4.551422000 | -3.404586000 | 1.572456000  |
| H  | -4.401570000 | -1.675100000 | 1.938379000  |
| H  | -5.940107000 | -2.336665000 | 1.386560000  |

$pC2^a_{iso}$ ,  $E_{(SCF Done)} = -3024.93264$  a.u.

|    |              |              |              |
|----|--------------|--------------|--------------|
| Sc | -0.498003000 | -0.559564000 | 0.241367000  |
| Si | 0.966748000  | 5.358668000  | 1.228410000  |
| C  | -0.338725000 | 3.962635000  | 1.330775000  |
| C  | 1.283261000  | 5.813732000  | -0.588303000 |
| C  | 2.589665000  | 4.773620000  | 2.026359000  |
| C  | 0.302047000  | 6.869838000  | 2.157149000  |
| C  | 0.327994000  | 0.519590000  | 3.584426000  |
| C  | 0.196888000  | -0.629163000 | 2.631048000  |
| C  | 1.264522000  | -1.174935000 | 1.860787000  |
| C  | 0.803301000  | -2.379927000 | 1.253427000  |
| C  | -0.571326000 | -2.584108000 | 1.616235000  |
| C  | -0.934326000 | -1.471827000 | 2.459855000  |
| C  | 2.669235000  | -0.646134000 | 1.857878000  |
| C  | 1.691944000  | -3.319989000 | 0.486774000  |

|   |              |              |              |
|---|--------------|--------------|--------------|
| C | 0.037176000  | 2.631847000  | 0.657073000  |
| C | -1.054810000 | 1.549970000  | 0.750543000  |
| H | -1.274486000 | 4.339162000  | 0.893400000  |
| H | -0.557312000 | 3.781768000  | 2.393446000  |
| H | 1.696905000  | 4.974925000  | -1.160947000 |
| H | 1.998895000  | 6.641115000  | -0.658248000 |
| H | 0.358677000  | 6.135107000  | -1.081958000 |
| H | 2.438788000  | 4.492603000  | 3.075329000  |
| H | 3.340806000  | 5.571627000  | 2.004006000  |
| H | 3.015118000  | 3.908987000  | 1.502674000  |
| H | -0.633813000 | 7.227110000  | 1.712444000  |
| H | 1.021697000  | 7.696022000  | 2.126710000  |
| H | 0.105684000  | 6.638078000  | 3.210265000  |
| H | 0.971064000  | 1.315504000  | 3.196778000  |
| H | 0.777163000  | 0.172207000  | 4.524558000  |
| H | -0.636467000 | 0.967218000  | 3.839627000  |
| H | 2.699111000  | 0.448882000  | 1.863681000  |
| H | 3.246624000  | -0.991254000 | 0.997086000  |
| H | 3.202156000  | -0.980906000 | 2.758166000  |
| H | 2.529508000  | -2.793981000 | 0.019487000  |
| H | 1.160561000  | -3.868891000 | -0.294879000 |
| H | 2.128325000  | -4.070840000 | 1.159320000  |
| H | 0.966782000  | 2.253229000  | 1.108656000  |
| H | 0.284836000  | 2.830097000  | -0.395089000 |
| H | -1.378582000 | 1.483756000  | 1.796927000  |
| C | -3.118868000 | -1.214281000 | -1.730593000 |
| O | -1.710956000 | -1.468516000 | -1.378985000 |
| C | -1.185008000 | -2.531806000 | -2.227095000 |
| C | -2.407352000 | -3.222377000 | -2.803501000 |
| C | -3.376706000 | -2.050824000 | -2.973661000 |
| H | -3.725214000 | -1.533766000 | -0.879467000 |
| H | -3.230840000 | -0.142084000 | -1.881456000 |
| H | -0.581516000 | -2.068192000 | -3.016534000 |
| H | -0.554073000 | -3.168733000 | -1.604296000 |
| H | -2.182207000 | -3.735265000 | -3.742622000 |
| H | -2.802723000 | -3.958216000 | -2.095230000 |
| H | -3.139754000 | -1.481125000 | -3.879171000 |
| H | -4.421777000 | -2.365239000 | -3.037113000 |
| C | -2.217939000 | 2.270400000  | -1.404864000 |
| C | -2.265363000 | 1.767423000  | -0.084842000 |
| C | -3.548544000 | 1.455414000  | 0.419750000  |
| C | -4.708110000 | 1.638437000  | -0.327092000 |
| C | -4.616905000 | 2.143429000  | -1.624433000 |
| C | -3.370209000 | 2.464163000  | -2.163380000 |

|    |              |              |              |
|----|--------------|--------------|--------------|
| H  | -1.265474000 | 2.562910000  | -1.840175000 |
| H  | -3.639843000 | 1.104682000  | 1.446021000  |
| H  | -5.680953000 | 1.414327000  | 0.100114000  |
| H  | -3.305262000 | 2.877055000  | -3.165752000 |
| C  | 4.208615000  | -1.719523000 | -2.223138000 |
| C  | 3.441255000  | -0.595812000 | -1.865008000 |
| C  | 4.107527000  | 0.525239000  | -1.333747000 |
| C  | 5.480482000  | 0.515710000  | -1.146674000 |
| C  | 6.215118000  | -0.623982000 | -1.493852000 |
| C  | 5.584292000  | -1.744539000 | -2.036514000 |
| H  | 3.718489000  | -2.588340000 | -2.656794000 |
| H  | 3.552381000  | 1.423830000  | -1.081263000 |
| H  | 5.991145000  | 1.384520000  | -0.744572000 |
| H  | 6.167995000  | -2.616136000 | -2.313310000 |
| C  | 2.005734000  | -0.626141000 | -2.101447000 |
| C  | 1.072206000  | 0.283343000  | -1.720238000 |
| H  | 1.669344000  | -1.480681000 | -2.689806000 |
| H  | 0.080974000  | 0.256920000  | -2.175338000 |
| H  | 1.346114000  | 1.200334000  | -1.203855000 |
| C  | -2.258131000 | -1.267188000 | 3.143485000  |
| H  | -3.104981000 | -1.523184000 | 2.500090000  |
| H  | -2.337105000 | -1.891249000 | 4.043384000  |
| H  | -2.389491000 | -0.230620000 | 3.468090000  |
| Cl | 7.927351000  | -0.635837000 | -1.259754000 |
| Cl | -6.058562000 | 2.386463000  | -2.566635000 |
| Si | -1.540439000 | -4.235852000 | 1.606981000  |
| C  | -0.881174000 | -5.515987000 | 0.368615000  |
| H  | 0.147680000  | -5.816580000 | 0.587905000  |
| H  | -1.505677000 | -6.412752000 | 0.466937000  |
| H  | -0.933717000 | -5.205110000 | -0.680414000 |
| C  | -1.320656000 | -4.971864000 | 3.339375000  |
| H  | -1.723235000 | -4.315244000 | 4.117709000  |
| H  | -1.840184000 | -5.934587000 | 3.413581000  |
| H  | -0.261512000 | -5.143237000 | 3.561255000  |
| C  | -3.396551000 | -4.021442000 | 1.261353000  |
| H  | -3.926932000 | -3.547389000 | 2.092631000  |
| H  | -3.597694000 | -3.442833000 | 0.353577000  |
| H  | -3.841369000 | -5.014288000 | 1.121589000  |

***p*TS2<sup>a</sup><sub>iso</sub>,  $E_{(\text{SCF Done})} = -3024.91485$  a.u. IF =  $i243.77$  cm<sup>-1</sup>**

|    |              |              |              |
|----|--------------|--------------|--------------|
| Sc | -0.186590000 | -0.731526000 | -0.085426000 |
| Si | 1.358427000  | 5.531286000  | 1.136407000  |
| C  | 0.332669000  | 3.912051000  | 1.011068000  |
| C  | 1.409265000  | 6.377406000  | -0.560592000 |

|   |              |              |              |
|---|--------------|--------------|--------------|
| C | 3.120612000  | 5.124943000  | 1.709492000  |
| C | 0.502652000  | 6.651601000  | 2.399976000  |
| C | 1.991198000  | -0.045841000 | 2.635920000  |
| C | 0.952882000  | -0.991080000 | 2.104923000  |
| C | 1.211244000  | -2.193478000 | 1.382810000  |
| C | -0.032844000 | -2.856372000 | 1.179420000  |
| C | -1.081947000 | -2.090337000 | 1.800147000  |
| C | -0.442217000 | -0.930879000 | 2.369682000  |
| C | 2.555648000  | -2.817364000 | 1.168263000  |
| C | -0.116486000 | -4.227105000 | 0.566497000  |
| C | 0.869438000  | 2.860912000  | 0.029105000  |
| C | -0.006667000 | 1.614036000  | -0.066655000 |
| H | -0.694863000 | 4.188849000  | 0.736374000  |
| H | 0.269696000  | 3.480575000  | 2.021378000  |
| H | 1.915163000  | 5.762899000  | -1.314568000 |
| H | 1.955696000  | 7.325283000  | -0.494835000 |
| H | 0.400649000  | 6.603679000  | -0.925830000 |
| H | 3.118371000  | 4.601113000  | 2.672659000  |
| H | 3.700821000  | 6.046030000  | 1.837592000  |
| H | 3.656345000  | 4.501424000  | 0.984105000  |
| H | -0.520532000 | 6.894630000  | 2.091237000  |
| H | 1.048190000  | 7.595485000  | 2.512794000  |
| H | 0.453168000  | 6.177655000  | 3.387061000  |
| H | 2.321881000  | -0.362887000 | 3.634318000  |
| H | 1.611406000  | 0.976413000  | 2.740490000  |
| H | 2.879497000  | -0.013729000 | 1.998646000  |
| H | 3.356210000  | -2.079384000 | 1.089187000  |
| H | 2.593528000  | -3.441007000 | 0.272247000  |
| H | 2.787951000  | -3.465105000 | 2.025266000  |
| H | 0.503838000  | -4.312131000 | -0.333328000 |
| H | -1.135299000 | -4.510452000 | 0.304790000  |
| H | 0.256205000  | -4.981789000 | 1.272174000  |
| H | 1.879962000  | 2.557625000  | 0.332272000  |
| H | 0.976833000  | 3.310684000  | -0.966856000 |
| H | -0.043589000 | 1.172562000  | 0.952990000  |
| C | -1.636155000 | -0.974383000 | -3.011039000 |
| O | -1.467413000 | -1.587134000 | -1.684576000 |
| C | -2.397594000 | -2.709828000 | -1.561286000 |
| C | -3.454948000 | -2.461589000 | -2.618691000 |
| C | -2.625210000 | -1.861538000 | -3.753875000 |
| H | -2.022695000 | 0.034999000  | -2.852498000 |
| H | -0.654566000 | -0.927611000 | -3.488822000 |
| H | -1.837281000 | -3.630268000 | -1.752208000 |
| H | -2.767099000 | -2.709162000 | -0.537098000 |

|    |              |              |              |
|----|--------------|--------------|--------------|
| H  | -3.969871000 | -3.382721000 | -2.904968000 |
| H  | -4.201500000 | -1.744545000 | -2.260417000 |
| H  | -2.101819000 | -2.649089000 | -4.307137000 |
| H  | -3.223357000 | -1.286599000 | -4.465631000 |
| C  | -1.638328000 | 2.547358000  | -1.749075000 |
| C  | -1.374086000 | 1.774025000  | -0.592510000 |
| C  | -2.467403000 | 1.104911000  | -0.004066000 |
| C  | -3.752182000 | 1.170924000  | -0.552935000 |
| C  | -3.971237000 | 1.937202000  | -1.691189000 |
| C  | -2.913792000 | 2.640705000  | -2.283389000 |
| H  | -0.836552000 | 3.111106000  | -2.217461000 |
| H  | -2.343344000 | 0.595866000  | 0.950968000  |
| H  | -4.582802000 | 0.669866000  | -0.067116000 |
| H  | -3.100918000 | 3.260425000  | -3.155049000 |
| C  | 3.535845000  | -2.204994000 | -1.990775000 |
| C  | 3.010919000  | -1.018976000 | -1.451639000 |
| C  | 3.900317000  | -0.164100000 | -0.779408000 |
| C  | 5.248875000  | -0.478823000 | -0.643959000 |
| C  | 5.737131000  | -1.667546000 | -1.185409000 |
| C  | 4.881410000  | -2.533013000 | -1.864974000 |
| H  | 2.881411000  | -2.880296000 | -2.538926000 |
| H  | 3.544473000  | 0.768870000  | -0.349118000 |
| H  | 5.921940000  | 0.194637000  | -0.122627000 |
| H  | 5.268456000  | -3.450314000 | -2.297234000 |
| C  | 1.593296000  | -0.686955000 | -1.677877000 |
| C  | 1.133062000  | 0.641026000  | -1.720350000 |
| H  | 1.055272000  | -1.420832000 | -2.284582000 |
| H  | 0.312411000  | 0.898627000  | -2.387994000 |
| H  | 1.863712000  | 1.434573000  | -1.608630000 |
| C  | -1.075292000 | 0.100267000  | 3.265592000  |
| H  | -2.165678000 | 0.113070000  | 3.188200000  |
| H  | -0.829796000 | -0.111673000 | 4.314181000  |
| H  | -0.719979000 | 1.117916000  | 3.064911000  |
| Cl | 7.420154000  | -2.066225000 | -1.017803000 |
| Cl | -5.565689000 | 2.054776000  | -2.365729000 |
| Si | -2.789948000 | -2.720270000 | 2.418392000  |
| C  | -3.222453000 | -4.470360000 | 1.825033000  |
| H  | -2.470690000 | -5.205309000 | 2.129034000  |
| H  | -4.163788000 | -4.749127000 | 2.315131000  |
| H  | -3.385146000 | -4.567214000 | 0.746626000  |
| C  | -2.688484000 | -2.809259000 | 4.308581000  |
| H  | -2.579481000 | -1.827348000 | 4.778158000  |
| H  | -3.604812000 | -3.264942000 | 4.702335000  |
| H  | -1.844224000 | -3.431865000 | 4.625030000  |

|   |              |              |             |
|---|--------------|--------------|-------------|
| C | -4.237166000 | -1.592038000 | 1.920045000 |
| H | -4.139586000 | -0.568598000 | 2.297910000 |
| H | -4.371230000 | -1.547060000 | 0.833437000 |
| H | -5.161335000 | -2.003365000 | 2.343654000 |

**pP2<sup>a</sup>**<sub>iso</sub>,  $E_{(\text{SCF Done})} = -3024.958907$  a.u.

|    |              |              |              |
|----|--------------|--------------|--------------|
| Sc | 0.628146000  | -0.458867000 | 0.340699000  |
| Si | -6.297320000 | 1.645870000  | 0.521997000  |
| C  | -4.548738000 | 1.163807000  | -0.113501000 |
| C  | -6.196940000 | 3.279197000  | 1.478996000  |
| C  | -6.964338000 | 0.270389000  | 1.644221000  |
| C  | -7.411942000 | 1.847289000  | -0.996357000 |
| C  | -0.516597000 | -0.966652000 | 3.742840000  |
| C  | 0.630994000  | -0.667903000 | 2.819335000  |
| C  | 1.116676000  | 0.641044000  | 2.512586000  |
| C  | 2.335856000  | 0.498003000  | 1.803481000  |
| C  | 2.629075000  | -0.908004000 | 1.653629000  |
| C  | 1.558014000  | -1.616609000 | 2.299979000  |
| C  | 0.526533000  | 1.927984000  | 3.005520000  |
| C  | 3.227843000  | 1.641600000  | 1.416976000  |
| C  | -3.506669000 | 0.937852000  | 0.980941000  |
| C  | -2.071029000 | 0.562415000  | 0.501368000  |
| H  | -4.228997000 | 1.961000000  | -0.798628000 |
| H  | -4.668840000 | 0.256920000  | -0.722979000 |
| H  | -5.577136000 | 3.192790000  | 2.378944000  |
| H  | -7.196672000 | 3.593645000  | 1.800052000  |
| H  | -5.782601000 | 4.081720000  | 0.857718000  |
| H  | -7.004112000 | -0.691231000 | 1.119251000  |
| H  | -7.982457000 | 0.508499000  | 1.973150000  |
| H  | -6.352569000 | 0.141123000  | 2.544592000  |
| H  | -7.034689000 | 2.626933000  | -1.668204000 |
| H  | -8.427469000 | 2.131295000  | -0.697318000 |
| H  | -7.483840000 | 0.914727000  | -1.567972000 |
| H  | -1.378144000 | -0.307372000 | 3.586973000  |
| H  | -0.201944000 | -0.824471000 | 4.785359000  |
| H  | -0.862030000 | -2.002188000 | 3.661763000  |
| H  | -0.566608000 | 1.892836000  | 3.069027000  |
| H  | 0.802869000  | 2.772209000  | 2.368961000  |
| H  | 0.894451000  | 2.150277000  | 4.016524000  |
| H  | 2.660618000  | 2.525163000  | 1.115981000  |
| H  | 3.894472000  | 1.388549000  | 0.589480000  |
| H  | 3.856707000  | 1.930356000  | 2.269262000  |
| H  | -3.850334000 | 0.146148000  | 1.659935000  |
| H  | -3.402674000 | 1.844966000  | 1.591908000  |

|    |              |              |              |
|----|--------------|--------------|--------------|
| H  | -1.500533000 | 0.422842000  | 1.441041000  |
| C  | 1.436441000  | -3.245138000 | -1.109107000 |
| O  | 1.170143000  | -1.816777000 | -1.294195000 |
| C  | 1.332183000  | -1.468589000 | -2.711349000 |
| C  | 1.914921000  | -2.709774000 | -3.369825000 |
| C  | 1.365402000  | -3.843751000 | -2.502040000 |
| H  | 2.432610000  | -3.337883000 | -0.669463000 |
| H  | 0.686641000  | -3.630197000 | -0.415887000 |
| H  | 0.340623000  | -1.216306000 | -3.097641000 |
| H  | 1.986096000  | -0.597060000 | -2.767123000 |
| H  | 1.612681000  | -2.788313000 | -4.417634000 |
| H  | 3.009441000  | -2.688669000 | -3.333965000 |
| H  | 0.330663000  | -4.078301000 | -2.770937000 |
| H  | 1.954337000  | -4.761882000 | -2.577677000 |
| C  | -2.316092000 | -0.892870000 | -1.597780000 |
| C  | -2.072536000 | -0.777687000 | -0.216050000 |
| C  | -1.957064000 | -1.967854000 | 0.526802000  |
| C  | -2.096873000 | -3.224030000 | -0.070736000 |
| C  | -2.359814000 | -3.299014000 | -1.435757000 |
| C  | -2.467639000 | -2.135409000 | -2.203784000 |
| H  | -2.423081000 | 0.003763000  | -2.201596000 |
| H  | -1.836173000 | -1.913091000 | 1.607083000  |
| H  | -2.039694000 | -4.130490000 | 0.524197000  |
| H  | -2.689794000 | -2.208166000 | -3.264178000 |
| C  | 1.919290000  | 2.463517000  | -2.008389000 |
| C  | 0.922626000  | 2.562330000  | -1.018312000 |
| C  | 0.829553000  | 3.798451000  | -0.351311000 |
| C  | 1.694693000  | 4.854498000  | -0.628035000 |
| C  | 2.684760000  | 4.704281000  | -1.595680000 |
| C  | 2.794191000  | 3.505006000  | -2.296654000 |
| H  | 2.002523000  | 1.548957000  | -2.592290000 |
| H  | 0.065394000  | 3.959989000  | 0.403141000  |
| H  | 1.595156000  | 5.796352000  | -0.097285000 |
| H  | 3.547112000  | 3.395737000  | -3.071196000 |
| C  | 0.053294000  | 1.395088000  | -0.707960000 |
| C  | -1.384789000 | 1.706951000  | -0.266479000 |
| H  | -0.006587000 | 0.778121000  | -1.634652000 |
| H  | -2.005000000 | 2.015567000  | -1.121204000 |
| H  | -1.384553000 | 2.562887000  | 0.415608000  |
| C  | 1.445645000  | -3.098618000 | 2.531392000  |
| H  | 2.022339000  | -3.678758000 | 1.810140000  |
| H  | 1.823062000  | -3.361343000 | 3.528575000  |
| H  | 0.407244000  | -3.447536000 | 2.490738000  |
| Cl | 3.769827000  | 6.018505000  | -1.945006000 |



|    |              |              |              |
|----|--------------|--------------|--------------|
| Cl | -2.569361000 | -4.847578000 | -2.189739000 |
| Si | 4.374165000  | -1.539331000 | 1.163450000  |
| C  | 4.798076000  | -1.139413000 | -0.645727000 |
| H  | 4.757001000  | -0.067551000 | -0.865446000 |
| H  | 5.818568000  | -1.477790000 | -0.861717000 |
| H  | 4.128174000  | -1.655048000 | -1.342669000 |
| C  | 5.627335000  | -0.703695000 | 2.312451000  |
| H  | 5.359404000  | -0.862099000 | 3.363125000  |
| H  | 6.618371000  | -1.144585000 | 2.151337000  |
| H  | 5.712745000  | 0.373258000  | 2.142377000  |
| C  | 4.603752000  | -3.408737000 | 1.411994000  |
| H  | 4.402200000  | -3.713650000 | 2.443905000  |
| H  | 4.013153000  | -4.045500000 | 0.744821000  |
| H  | 5.659338000  | -3.629762000 | 1.209909000  |

**b**,  $E_{(\text{SCF Done})} = -1210.614978$  a.u.

|    |              |              |              |
|----|--------------|--------------|--------------|
| Sc | -0.050578000 | 0.258986000  | -0.236087000 |
| N  | -1.454355000 | 2.073349000  | -0.141882000 |
| C  | -1.115873000 | 0.030494000  | -2.144439000 |
| H  | -0.898726000 | 0.951280000  | -2.697703000 |
| H  | -1.081272000 | -0.828447000 | -2.813920000 |
| C  | -2.303298000 | 0.054362000  | -1.281083000 |
| C  | -2.456985000 | 1.015756000  | -0.230537000 |
| C  | -3.524968000 | 0.930095000  | 0.680725000  |
| H  | -3.646778000 | 1.682713000  | 1.452831000  |
| C  | -4.447282000 | -0.099058000 | 0.588277000  |
| H  | -5.275094000 | -0.147806000 | 1.289165000  |
| C  | -4.311347000 | -1.062398000 | -0.420885000 |
| H  | -5.037894000 | -1.865800000 | -0.505186000 |
| C  | -3.262553000 | -0.988681000 | -1.318899000 |
| H  | -3.171016000 | -1.731454000 | -2.106450000 |
| C  | -1.343695000 | 2.713091000  | 1.182949000  |
| H  | -2.218866000 | 3.333176000  | 1.415870000  |
| H  | -0.463972000 | 3.363452000  | 1.184842000  |
| H  | -1.235601000 | 1.959792000  | 1.970963000  |
| C  | -1.614357000 | 3.119764000  | -1.178333000 |
| H  | -1.778810000 | 2.665055000  | -2.154792000 |
| H  | -0.712867000 | 3.738160000  | -1.214932000 |
| H  | -2.477666000 | 3.753930000  | -0.940318000 |
| C  | 1.962817000  | -0.758380000 | 0.385462000  |
| C  | 1.192737000  | -0.595331000 | 1.594470000  |
| C  | 0.058346000  | -1.450940000 | 1.524598000  |
| C  | 0.125731000  | -2.171741000 | 0.289192000  |
| C  | 1.293905000  | -1.758816000 | -0.404577000 |

|    |              |              |              |
|----|--------------|--------------|--------------|
| C  | 1.527229000  | 0.305678000  | 2.754770000  |
| H  | 0.750552000  | 0.271468000  | 3.523632000  |
| H  | 1.662191000  | 1.358324000  | 2.472233000  |
| H  | 2.463008000  | -0.009721000 | 3.229934000  |
| C  | -0.977156000 | -1.671160000 | 2.590775000  |
| H  | -0.729496000 | -2.555333000 | 3.192509000  |
| H  | -1.972310000 | -1.838577000 | 2.166363000  |
| H  | -1.052243000 | -0.825395000 | 3.280908000  |
| C  | -0.812168000 | -3.270565000 | -0.113244000 |
| H  | -0.885911000 | -3.378168000 | -1.199087000 |
| H  | -1.822245000 | -3.104872000 | 0.271872000  |
| H  | -0.465376000 | -4.232580000 | 0.286743000  |
| C  | 1.747956000  | -2.319478000 | -1.724210000 |
| H  | 2.703624000  | -2.845076000 | -1.614443000 |
| H  | 1.884978000  | -1.553517000 | -2.494810000 |
| H  | 1.024673000  | -3.039994000 | -2.113483000 |
| Si | 3.282176000  | 0.458238000  | -0.231336000 |
| C  | 4.377498000  | -0.212493000 | -1.612694000 |
| H  | 3.836656000  | -0.421527000 | -2.539298000 |
| H  | 5.153229000  | 0.528554000  | -1.838790000 |
| H  | 4.882029000  | -1.132580000 | -1.298112000 |
| C  | 4.386882000  | 1.157629000  | 1.130857000  |
| H  | 4.904999000  | 0.346488000  | 1.654773000  |
| H  | 5.152099000  | 1.795951000  | 0.673646000  |
| H  | 3.854815000  | 1.756161000  | 1.875130000  |
| C  | 2.174897000  | 1.873059000  | -0.943137000 |
| H  | 2.786671000  | 2.684313000  | -1.355984000 |
| H  | 1.541454000  | 1.548291000  | -1.788723000 |
| H  | 1.547433000  | 2.360940000  | -0.175884000 |

**pC1<sup>b</sup>**,  $E_{(\text{SCF Done})} = -1979.702425$  a.u.

|    |              |             |              |
|----|--------------|-------------|--------------|
| Sc | -0.664290000 | 0.152427000 | -0.082986000 |
| N  | 0.775712000  | 1.951428000 | -0.191828000 |
| C  | -1.284398000 | 1.037769000 | -1.994295000 |
| H  | -0.402067000 | 0.938712000 | -2.640044000 |
| H  | -2.177790000 | 0.793414000 | -2.570465000 |
| C  | -1.398265000 | 2.332548000 | -1.292251000 |
| C  | -0.422397000 | 2.773516000 | -0.350686000 |
| C  | -0.600326000 | 3.959537000 | 0.378738000  |
| H  | 0.163907000  | 4.294121000 | 1.072415000  |
| C  | -1.742140000 | 4.726877000 | 0.206421000  |
| H  | -1.864379000 | 5.649030000 | 0.766641000  |
| C  | -2.721767000 | 4.311361000 | -0.703559000 |
| H  | -3.613338000 | 4.913509000 | -0.855239000 |

|   |              |              |              |
|---|--------------|--------------|--------------|
| C | -2.552154000 | 3.140988000  | -1.422211000 |
| H | -3.309275000 | 2.833703000  | -2.138654000 |
| C | 1.480929000  | 2.125806000  | 1.092587000  |
| H | 1.977489000  | 3.102778000  | 1.158788000  |
| H | 2.250212000  | 1.352759000  | 1.174654000  |
| H | 0.780173000  | 2.033156000  | 1.927038000  |
| C | 1.736932000  | 2.162031000  | -1.298160000 |
| H | 1.234111000  | 2.067219000  | -2.260984000 |
| H | 2.538357000  | 1.422412000  | -1.227929000 |
| H | 2.168826000  | 3.169250000  | -1.230961000 |
| C | -1.901012000 | 0.278725000  | 2.032171000  |
| C | -2.844244000 | 0.003978000  | 0.995283000  |
| C | -2.567840000 | -1.292391000 | 0.447129000  |
| C | -1.453797000 | -1.820268000 | 1.191963000  |
| C | -1.041217000 | -0.852969000 | 2.154132000  |
| C | -4.009921000 | 0.895564000  | 0.679509000  |
| H | -4.237570000 | 0.931644000  | -0.386650000 |
| H | -3.836871000 | 1.919937000  | 1.018542000  |
| H | -4.908543000 | 0.531552000  | 1.195311000  |
| C | -0.956385000 | -3.239379000 | 1.146308000  |
| H | 0.024150000  | -3.355213000 | 1.618553000  |
| H | -0.893714000 | -3.645850000 | 0.132553000  |
| H | -1.640439000 | -3.890099000 | 1.705403000  |
| C | 0.012109000  | -1.041029000 | 3.209805000  |
| H | -0.431649000 | -1.441200000 | 4.130976000  |
| H | 0.508003000  | -0.102784000 | 3.481509000  |
| H | 0.788866000  | -1.748436000 | 2.902478000  |
| C | -1.928033000 | 1.471522000  | 2.946712000  |
| H | -2.729878000 | 1.364231000  | 3.689069000  |
| H | -0.994936000 | 1.579097000  | 3.509301000  |
| H | -2.107778000 | 2.409260000  | 2.411201000  |
| C | 5.944428000  | -0.582983000 | -0.190685000 |
| C | 5.288033000  | -1.042350000 | 0.952377000  |
| C | 3.951582000  | -1.411002000 | 0.862905000  |
| C | 3.245551000  | -1.312134000 | -0.349341000 |
| C | 3.938388000  | -0.864275000 | -1.490166000 |
| C | 5.275305000  | -0.501309000 | -1.416639000 |
| H | 5.824631000  | -1.120000000 | 1.892211000  |
| H | 3.446962000  | -1.787044000 | 1.750092000  |
| H | 3.439843000  | -0.832763000 | -2.455062000 |
| H | 5.809229000  | -0.171623000 | -2.301952000 |
| C | 1.844629000  | -1.721508000 | -0.386579000 |
| C | 0.934613000  | -1.478550000 | -1.361071000 |
| H | 1.518262000  | -2.309371000 | 0.470744000  |

|    |              |              |              |
|----|--------------|--------------|--------------|
| H  | -0.026813000 | -1.997007000 | -1.353287000 |
| H  | 1.184692000  | -0.945804000 | -2.275127000 |
| Cl | 7.609301000  | -0.127973000 | -0.096939000 |
| Si | -3.608950000 | -2.300219000 | -0.810172000 |
| C  | -4.430740000 | -3.724088000 | 0.132843000  |
| H  | -5.109416000 | -4.267428000 | -0.535331000 |
| H  | -3.706839000 | -4.445548000 | 0.525198000  |
| H  | -5.022343000 | -3.346122000 | 0.974084000  |
| C  | -2.529118000 | -2.998172000 | -2.212497000 |
| H  | -1.754203000 | -3.695153000 | -1.875523000 |
| H  | -3.173935000 | -3.555064000 | -2.903519000 |
| H  | -2.054607000 | -2.197447000 | -2.792687000 |
| C  | -4.968325000 | -1.280262000 | -1.646166000 |
| H  | -5.710293000 | -0.895691000 | -0.940248000 |
| H  | -4.571911000 | -0.442025000 | -2.229130000 |
| H  | -5.494356000 | -1.941798000 | -2.345545000 |

**pTS1<sup>b</sup>**,  $E_{(\text{SCF Done})} = -1979.681813$  a.u. **IF** =  $i308.61$  cm<sup>-1</sup>

|    |              |              |              |
|----|--------------|--------------|--------------|
| Sc | -0.144068000 | -0.101646000 | 0.068072000  |
| N  | 0.978408000  | 1.844200000  | 0.711147000  |
| C  | -0.040091000 | 1.186134000  | -1.985791000 |
| H  | 0.976087000  | 1.531598000  | -2.170784000 |
| H  | -0.590790000 | 1.182277000  | -2.924640000 |
| C  | -0.750021000 | 2.094406000  | -1.027520000 |
| C  | -0.238902000 | 2.481779000  | 0.244172000  |
| C  | -0.903861000 | 3.450397000  | 1.011545000  |
| H  | -0.491499000 | 3.760135000  | 1.965723000  |
| C  | -2.071711000 | 4.038924000  | 0.552156000  |
| H  | -2.559727000 | 4.804722000  | 1.147772000  |
| C  | -2.613922000 | 3.644269000  | -0.675665000 |
| H  | -3.526508000 | 4.103604000  | -1.044061000 |
| C  | -1.972259000 | 2.679511000  | -1.432667000 |
| H  | -2.380232000 | 2.399757000  | -2.400075000 |
| C  | 1.172727000  | 1.868760000  | 2.174962000  |
| H  | 1.450384000  | 2.869536000  | 2.531007000  |
| H  | 1.989827000  | 1.185696000  | 2.422814000  |
| H  | 0.266591000  | 1.545774000  | 2.688034000  |
| C  | 2.202261000  | 2.411639000  | 0.090212000  |
| H  | 2.099454000  | 2.485314000  | -0.989939000 |
| H  | 3.052408000  | 1.767053000  | 0.320097000  |
| H  | 2.381189000  | 3.418086000  | 0.490344000  |
| C  | -1.048355000 | -1.011989000 | 2.209700000  |
| C  | -2.100964000 | -0.346717000 | 1.519944000  |
| C  | -2.373911000 | -1.061600000 | 0.295323000  |

|    |              |              |              |
|----|--------------|--------------|--------------|
| C  | -1.486037000 | -2.193878000 | 0.282682000  |
| C  | -0.660112000 | -2.147411000 | 1.434078000  |
| C  | -2.900705000 | 0.790682000  | 2.089027000  |
| H  | -3.250900000 | 1.481809000  | 1.321147000  |
| H  | -2.328549000 | 1.371330000  | 2.819050000  |
| H  | -3.785189000 | 0.406720000  | 2.614316000  |
| C  | -1.520799000 | -3.348997000 | -0.676577000 |
| H  | -0.531881000 | -3.781746000 | -0.864127000 |
| H  | -1.955353000 | -3.083340000 | -1.643046000 |
| H  | -2.133815000 | -4.159180000 | -0.260910000 |
| C  | 0.305469000  | -3.207282000 | 1.875402000  |
| H  | -0.214933000 | -3.978012000 | 2.460211000  |
| H  | 1.097599000  | -2.806989000 | 2.517097000  |
| H  | 0.779056000  | -3.721881000 | 1.032553000  |
| C  | -0.573585000 | -0.756025000 | 3.613386000  |
| H  | -0.993543000 | -1.512568000 | 4.289161000  |
| H  | 0.516265000  | -0.816019000 | 3.716556000  |
| H  | -0.896491000 | 0.215582000  | 3.998057000  |
| C  | 5.332676000  | -0.401164000 | -0.394014000 |
| C  | 4.620082000  | -1.245916000 | 0.458380000  |
| C  | 3.292655000  | -1.544394000 | 0.172560000  |
| C  | 2.636533000  | -1.017181000 | -0.960098000 |
| C  | 3.389334000  | -0.172912000 | -1.799862000 |
| C  | 4.720321000  | 0.128879000  | -1.529703000 |
| H  | 5.107739000  | -1.674344000 | 1.328501000  |
| H  | 2.756969000  | -2.228080000 | 0.826603000  |
| H  | 2.950399000  | 0.228151000  | -2.709737000 |
| H  | 5.288051000  | 0.763223000  | -2.203454000 |
| C  | 1.231580000  | -1.372135000 | -1.221758000 |
| C  | 0.462299000  | -0.756547000 | -2.251739000 |
| H  | 0.921628000  | -2.359201000 | -0.894619000 |
| H  | -0.488701000 | -1.235979000 | -2.486920000 |
| H  | 0.949572000  | -0.390686000 | -3.152760000 |
| Cl | 6.989814000  | -0.018590000 | -0.046326000 |
| Si | -3.931996000 | -0.962130000 | -0.820866000 |
| C  | -4.954289000 | -2.525708000 | -0.497645000 |
| H  | -5.902354000 | -2.464877000 | -1.045297000 |
| H  | -4.447504000 | -3.441790000 | -0.815985000 |
| H  | -5.191004000 | -2.622543000 | 0.567925000  |
| C  | -3.494228000 | -0.872897000 | -2.670573000 |
| H  | -2.956590000 | -1.754402000 | -3.035636000 |
| H  | -4.423700000 | -0.805532000 | -3.249053000 |
| H  | -2.897669000 | 0.014186000  | -2.910780000 |
| C  | -5.049658000 | 0.519073000  | -0.440287000 |

|   |              |             |              |
|---|--------------|-------------|--------------|
| H | -5.441447000 | 0.494285000 | 0.581184000  |
| H | -4.563258000 | 1.485376000 | -0.602091000 |
| H | -5.909066000 | 0.463778000 | -1.119905000 |

**pP1<sup>b</sup>**,  $E_{(\text{SCF Done})} = -1979.705534$  a.u.

|    |              |              |              |
|----|--------------|--------------|--------------|
| Sc | -0.277075000 | -0.203993000 | 0.188997000  |
| N  | 0.787365000  | 1.543710000  | 1.316764000  |
| C  | 0.648123000  | 1.802724000  | -1.755015000 |
| H  | 1.682650000  | 1.985034000  | -1.463969000 |
| H  | 0.498318000  | 2.382944000  | -2.669818000 |
| C  | -0.329522000 | 2.403369000  | -0.739503000 |
| C  | -0.229463000 | 2.368274000  | 0.683363000  |
| C  | -1.158576000 | 3.074599000  | 1.466427000  |
| H  | -1.068434000 | 3.068156000  | 2.546363000  |
| C  | -2.180445000 | 3.814395000  | 0.886516000  |
| H  | -2.869732000 | 4.366278000  | 1.518762000  |
| C  | -2.302272000 | 3.851238000  | -0.500941000 |
| H  | -3.092041000 | 4.428800000  | -0.971765000 |
| C  | -1.387887000 | 3.159098000  | -1.282333000 |
| H  | -1.465454000 | 3.222420000  | -2.364804000 |
| C  | 0.569033000  | 1.270932000  | 2.752699000  |
| H  | 0.726750000  | 2.166634000  | 3.368016000  |
| H  | 1.293480000  | 0.515048000  | 3.066236000  |
| H  | -0.439828000 | 0.891966000  | 2.930837000  |
| C  | 2.172023000  | 2.066344000  | 1.178354000  |
| H  | 2.391426000  | 2.355106000  | 0.155661000  |
| H  | 2.877231000  | 1.287172000  | 1.473305000  |
| H  | 2.294802000  | 2.944152000  | 1.825575000  |
| C  | -1.067101000 | -1.872386000 | 1.798813000  |
| C  | -2.164151000 | -1.021538000 | 1.475606000  |
| C  | -2.484583000 | -1.193209000 | 0.079157000  |
| C  | -1.589080000 | -2.204976000 | -0.419778000 |
| C  | -0.715638000 | -2.606538000 | 0.621087000  |
| C  | -2.926201000 | -0.191581000 | 2.473489000  |
| H  | -3.156025000 | 0.813857000  | 2.109954000  |
| H  | -2.386045000 | -0.093576000 | 3.420624000  |
| H  | -3.882058000 | -0.671752000 | 2.717027000  |
| C  | -1.617778000 | -2.849096000 | -1.775814000 |
| H  | -0.616205000 | -3.113387000 | -2.131952000 |
| H  | -2.085042000 | -2.216692000 | -2.533991000 |
| H  | -2.190904000 | -3.784796000 | -1.736717000 |
| C  | 0.280248000  | -3.725869000 | 0.552495000  |
| H  | -0.225825000 | -4.692946000 | 0.675250000  |
| H  | 1.031971000  | -3.660085000 | 1.345168000  |

|    |              |              |              |
|----|--------------|--------------|--------------|
| H  | 0.806728000  | -3.759915000 | -0.406659000 |
| C  | -0.468804000 | -2.119456000 | 3.156734000  |
| H  | -0.831662000 | -3.072195000 | 3.563342000  |
| H  | 0.625308000  | -2.188134000 | 3.128277000  |
| H  | -0.734162000 | -1.346196000 | 3.882822000  |
| C  | 5.423532000  | -0.321140000 | -0.390618000 |
| C  | 4.616176000  | -1.163923000 | 0.373597000  |
| C  | 3.262971000  | -1.272759000 | 0.068361000  |
| C  | 2.675146000  | -0.565766000 | -0.998531000 |
| C  | 3.528258000  | 0.248248000  | -1.764468000 |
| C  | 4.883641000  | 0.379726000  | -1.466342000 |
| H  | 5.046453000  | -1.728269000 | 1.195334000  |
| H  | 2.644094000  | -1.944565000 | 0.660547000  |
| H  | 3.146298000  | 0.768149000  | -2.639692000 |
| H  | 5.522931000  | 1.009260000  | -2.077681000 |
| C  | 1.217761000  | -0.738514000 | -1.272869000 |
| C  | 0.512777000  | 0.298330000  | -2.158823000 |
| H  | 1.017871000  | -1.738081000 | -1.672280000 |
| H  | -0.570625000 | 0.047489000  | -2.225806000 |
| H  | 0.832665000  | 0.220238000  | -3.207530000 |
| Cl | 7.111202000  | -0.158022000 | -0.007284000 |
| Si | -4.053767000 | -0.610630000 | -0.861140000 |
| C  | -5.138922000 | -2.138659000 | -1.129883000 |
| H  | -6.073059000 | -1.853601000 | -1.628040000 |
| H  | -4.646790000 | -2.893326000 | -1.751583000 |
| H  | -5.398326000 | -2.606795000 | -0.173765000 |
| C  | -3.635711000 | 0.185347000  | -2.536239000 |
| H  | -3.122201000 | -0.483179000 | -3.234500000 |
| H  | -4.571860000 | 0.492640000  | -3.018728000 |
| H  | -3.026594000 | 1.087520000  | -2.409316000 |
| C  | -5.054565000 | 0.675157000  | 0.104705000  |
| H  | -5.436924000 | 0.291079000  | 1.054916000  |
| H  | -4.491424000 | 1.593801000  | 0.300772000  |
| H  | -5.922367000 | 0.948775000  | -0.508166000 |

**pC2<sup>b</sup><sub>syn</sub>, E<sub>(SCF Done)</sub> = -2748.794083**

|    |              |              |              |
|----|--------------|--------------|--------------|
| Sc | -0.362444000 | -0.309386000 | -0.574877000 |
| N  | 5.801482000  | 0.385853000  | -1.485963000 |
| C  | 3.760342000  | 2.215347000  | -0.502871000 |
| H  | 4.399061000  | 2.660129000  | -1.271549000 |
| H  | 3.356649000  | 3.046368000  | 0.089681000  |
| C  | 4.544778000  | 1.300059000  | 0.407654000  |
| C  | 5.485531000  | 0.368634000  | -0.094603000 |
| C  | 6.074637000  | -0.547161000 | 0.787387000  |

|   |              |              |              |
|---|--------------|--------------|--------------|
| H | 6.796977000  | -1.265693000 | 0.411509000  |
| C | 5.774288000  | -0.536844000 | 2.149406000  |
| H | 6.256378000  | -1.251317000 | 2.811785000  |
| C | 4.888412000  | 0.408604000  | 2.656406000  |
| H | 4.668764000  | 0.446760000  | 3.720001000  |
| C | 4.284580000  | 1.312353000  | 1.781674000  |
| H | 3.585010000  | 2.049440000  | 2.172364000  |
| C | 6.222297000  | -0.880481000 | -2.062116000 |
| H | 7.244694000  | -1.185563000 | -1.775647000 |
| H | 6.204022000  | -0.792657000 | -3.154481000 |
| H | 5.531065000  | -1.676323000 | -1.769512000 |
| C | 6.736663000  | 1.447958000  | -1.857423000 |
| H | 6.441644000  | 2.398751000  | -1.408205000 |
| H | 6.742814000  | 1.566140000  | -2.946991000 |
| H | 7.766557000  | 1.227125000  | -1.527422000 |
| C | 0.669454000  | -2.158877000 | 0.637857000  |
| C | -0.755664000 | -2.229005000 | 0.839561000  |
| C | -1.330339000 | -2.553362000 | -0.439755000 |
| C | -0.287199000 | -2.637278000 | -1.404620000 |
| C | 0.952092000  | -2.375323000 | -0.737707000 |
| C | -2.772263000 | -2.889914000 | -0.695993000 |
| H | -3.031644000 | -3.844668000 | -0.221603000 |
| H | -2.977866000 | -2.999072000 | -1.763288000 |
| H | -3.459355000 | -2.135806000 | -0.302636000 |
| C | -0.404550000 | -3.142089000 | -2.814442000 |
| H | 0.320440000  | -2.674867000 | -3.489801000 |
| H | -1.404670000 | -2.994478000 | -3.232563000 |
| H | -0.207390000 | -4.221917000 | -2.841590000 |
| C | 2.310977000  | -2.455765000 | -1.368218000 |
| H | 2.691254000  | -3.485712000 | -1.334459000 |
| H | 3.041069000  | -1.822072000 | -0.857042000 |
| H | 2.293784000  | -2.155554000 | -2.420997000 |
| C | 1.719799000  | -2.003140000 | 1.700579000  |
| H | 1.847839000  | -2.952444000 | 2.237379000  |
| H | 2.695770000  | -1.741976000 | 1.283275000  |
| H | 1.469532000  | -1.248076000 | 2.450560000  |
| C | -0.276125000 | 1.336307000  | 1.359669000  |
| C | 0.564101000  | 1.860612000  | 0.331700000  |
| C | 0.236612000  | 3.167779000  | -0.132619000 |
| C | -0.823199000 | 3.884278000  | 0.396168000  |
| C | -1.638252000 | 3.325092000  | 1.396880000  |
| C | -1.358902000 | 2.059435000  | 1.887574000  |
| H | 0.029093000  | 0.425163000  | 1.878476000  |
| H | 0.861760000  | 3.640073000  | -0.885066000 |



|    |              |              |              |
|----|--------------|--------------|--------------|
| H  | -1.028224000 | 4.891620000  | 0.045322000  |
| H  | -1.949154000 | 1.645061000  | 2.699178000  |
| C  | 1.517147000  | 0.972302000  | -0.299192000 |
| C  | 2.596120000  | 1.493696000  | -1.226059000 |
| H  | 1.923595000  | 0.250928000  | 0.420851000  |
| H  | 2.175489000  | 2.190370000  | -1.964077000 |
| H  | 3.026835000  | 0.665815000  | -1.800891000 |
| C  | -3.600333000 | -0.440723000 | -2.971829000 |
| C  | -2.504468000 | 0.292261000  | -2.478958000 |
| C  | -2.722517000 | 1.161849000  | -1.390384000 |
| C  | -3.984422000 | 1.291595000  | -0.813772000 |
| C  | -5.054263000 | 0.563846000  | -1.336694000 |
| C  | -4.865974000 | -0.297464000 | -2.423091000 |
| H  | -3.459891000 | -1.108504000 | -3.817989000 |
| H  | -1.931837000 | 1.823673000  | -1.029525000 |
| H  | -4.143341000 | 1.974220000  | 0.014422000  |
| H  | -5.708997000 | -0.848729000 | -2.827026000 |
| C  | -1.188942000 | 0.127668000  | -3.107423000 |
| C  | -0.116271000 | 0.935281000  | -2.942885000 |
| H  | -1.091494000 | -0.729612000 | -3.769836000 |
| H  | 0.816988000  | 0.729243000  | -3.456701000 |
| H  | -0.172459000 | 1.877652000  | -2.401708000 |
| Cl | -6.625380000 | 0.732811000  | -0.641324000 |
| Cl | -2.969997000 | 4.240191000  | 2.033444000  |
| Si | -1.703134000 | -2.366803000 | 2.504302000  |
| C  | -3.383453000 | -1.482881000 | 2.426502000  |
| H  | -4.123057000 | -2.038340000 | 1.841876000  |
| H  | -3.781565000 | -1.391333000 | 3.444352000  |
| H  | -3.312207000 | -0.471090000 | 2.010874000  |
| C  | -1.966739000 | -4.212788000 | 2.835860000  |
| H  | -2.501487000 | -4.352271000 | 3.782831000  |
| H  | -2.553893000 | -4.695815000 | 2.047851000  |
| H  | -1.008632000 | -4.738771000 | 2.911160000  |
| C  | -0.747222000 | -1.644709000 | 3.975783000  |
| H  | -1.389410000 | -1.743437000 | 4.859943000  |
| H  | 0.175554000  | -2.193594000 | 4.184948000  |
| H  | -0.500260000 | -0.581390000 | 3.879828000  |

$pTS2^b_{syn}$ ,  $E_{(SCF_{Done})} = -2748.781328$  a.u.  $IF = i178.46$   $cm^{-1}$

|    |              |              |              |
|----|--------------|--------------|--------------|
| Sc | -0.483360000 | -0.409476000 | -0.571415000 |
| N  | 5.613450000  | 0.185549000  | -1.573362000 |
| C  | 3.730662000  | 2.173391000  | -0.571999000 |
| H  | 4.449373000  | 2.694499000  | -1.213382000 |
| H  | 3.260602000  | 2.946595000  | 0.048138000  |

|   |               |               |               |
|---|---------------|---------------|---------------|
| C | 4. 421818000  | 1. 174180000  | 0. 327722000  |
| C | 5. 294540000  | 0. 181840000  | -0. 182448000 |
| C | 5. 817778000  | -0. 779094000 | 0. 692970000  |
| H | 6. 485054000  | -1. 545693000 | 0. 310490000  |
| C | 5. 527213000  | -0. 751368000 | 2. 056661000  |
| H | 5. 962015000  | -1. 499680000 | 2. 714238000  |
| C | 4. 711925000  | 0. 251688000  | 2. 571326000  |
| H | 4. 501107000  | 0. 301531000  | 3. 636094000  |
| C | 4. 165811000  | 1. 196924000  | 1. 702377000  |
| H | 3. 520521000  | 1. 978797000  | 2. 099393000  |
| C | 5. 934330000  | -1. 106614000 | -2. 159136000 |
| H | 6. 926299000  | -1. 495144000 | -1. 868858000 |
| H | 5. 930974000  | -1. 007287000 | -3. 250439000 |
| H | 5. 178173000  | -1. 845826000 | -1. 878644000 |
| C | 6. 629432000  | 1. 174442000  | -1. 937249000 |
| H | 6. 411467000  | 2. 142121000  | -1. 480630000 |
| H | 6. 644248000  | 1. 300415000  | -3. 025644000 |
| H | 7. 638306000  | 0. 870453000  | -1. 609775000 |
| C | 0. 454031000  | -2. 075787000 | 0. 953567000  |
| C | -0. 964742000 | -2. 016002000 | 1. 181371000  |
| C | -1. 589274000 | -2. 509284000 | -0. 020382000 |
| C | -0. 576609000 | -2. 848578000 | -0. 960985000 |
| C | 0. 688651000  | -2. 552759000 | -0. 367478000 |
| C | -3. 059949000 | -2. 760084000 | -0. 213841000 |
| H | -3. 431212000 | -3. 471725000 | 0. 532754000  |
| H | -3. 263056000 | -3. 192664000 | -1. 196133000 |
| H | -3. 665573000 | -1. 852633000 | -0. 124722000 |
| C | -0. 772301000 | -3. 593198000 | -2. 248152000 |
| H | 0. 056954000  | -3. 440640000 | -2. 946185000 |
| H | -1. 699882000 | -3. 318199000 | -2. 758268000 |
| H | -0. 823741000 | -4. 672317000 | -2. 051710000 |
| C | 2. 028750000  | -2. 842357000 | -0. 980680000 |
| H | 2. 322563000  | -3. 883141000 | -0. 789294000 |
| H | 2. 819218000  | -2. 207500000 | -0. 568338000 |
| H | 2. 024206000  | -2. 706778000 | -2. 067451000 |
| C | 1. 546854000  | -1. 830818000 | 1. 956060000  |
| H | 1. 774078000  | -2. 763999000 | 2. 489323000  |
| H | 2. 481727000  | -1. 499320000 | 1. 494311000  |
| H | 1. 274263000  | -1. 094985000 | 2. 715027000  |
| C | -0. 027346000 | 1. 441048000  | 1. 184636000  |
| C | 0. 613582000  | 1. 891917000  | 0. 001974000  |
| C | 0. 262980000  | 3. 186801000  | -0. 464372000 |
| C | -0. 689274000 | 3. 954289000  | 0. 183632000  |
| C | -1. 353513000 | 3. 451753000  | 1. 315127000  |

|    |              |              |              |
|----|--------------|--------------|--------------|
| C  | -1.016625000 | 2.205244000  | 1.823168000  |
| H  | 0.349708000  | 0.557319000  | 1.696668000  |
| H  | 0.761720000  | 3.600100000  | -1.336135000 |
| H  | -0.931660000 | 4.948160000  | -0.180509000 |
| H  | -1.481240000 | 1.847486000  | 2.736019000  |
| C  | 1.462796000  | 0.986196000  | -0.771461000 |
| C  | 2.671709000  | 1.543641000  | -1.502394000 |
| H  | 1.761736000  | 0.100585000  | -0.180276000 |
| H  | 2.357350000  | 2.303487000  | -2.230998000 |
| H  | 3.165039000  | 0.749234000  | -2.072029000 |
| C  | -3.124493000 | -0.770741000 | -3.108058000 |
| C  | -2.062485000 | -0.002242000 | -2.575677000 |
| C  | -2.402678000 | 1.019826000  | -1.656036000 |
| C  | -3.732561000 | 1.266619000  | -1.289604000 |
| C  | -4.746031000 | 0.495980000  | -1.843145000 |
| C  | -4.440283000 | -0.516755000 | -2.766045000 |
| H  | -2.903838000 | -1.546137000 | -3.836376000 |
| H  | -1.648591000 | 1.737315000  | -1.318874000 |
| H  | -3.970717000 | 2.070720000  | -0.600966000 |
| H  | -5.243887000 | -1.096426000 | -3.209565000 |
| C  | -0.672410000 | -0.314121000 | -2.883127000 |
| C  | 0.383284000  | 0.595296000  | -2.733819000 |
| H  | -0.475904000 | -1.257416000 | -3.383104000 |
| H  | 1.330569000  | 0.328377000  | -3.188120000 |
| H  | 0.174303000  | 1.663065000  | -2.709706000 |
| Cl | -6.395769000 | 0.790571000  | -1.410148000 |
| Cl | -2.559681000 | 4.416991000  | 2.098673000  |
| Si | -1.903533000 | -1.814972000 | 2.843315000  |
| C  | -3.499124000 | -0.810577000 | 2.621729000  |
| H  | -4.261869000 | -1.357558000 | 2.059711000  |
| H  | -3.920409000 | -0.592660000 | 3.610592000  |
| H  | -3.331117000 | 0.148598000  | 2.118674000  |
| C  | -2.323494000 | -3.557868000 | 3.457288000  |
| H  | -2.869652000 | -3.498007000 | 4.406231000  |
| H  | -2.947370000 | -4.114013000 | 2.750230000  |
| H  | -1.412633000 | -4.141344000 | 3.631580000  |
| C  | -0.873849000 | -0.980183000 | 4.203761000  |
| H  | -1.530009000 | -0.840341000 | 5.071911000  |
| H  | -0.039576000 | -1.608254000 | 4.531335000  |
| H  | -0.475731000 | 0.006170000  | 3.941664000  |

$pP2^b_{\text{syn}}, E_{(\text{SCF Done})} = -2748.815854 \text{ a.u.}$

|    |              |              |              |
|----|--------------|--------------|--------------|
| Sc | 0.879924000  | -0.163000000 | -0.405393000 |
| N  | -5.972313000 | -1.350121000 | -0.486230000 |

|   |              |              |              |
|---|--------------|--------------|--------------|
| C | -4.367583000 | -0.570296000 | 1.844466000  |
| H | -5.264515000 | -1.020738000 | 2.284161000  |
| H | -3.901716000 | 0.009711000  | 2.651784000  |
| C | -4.718041000 | 0.379095000  | 0.717528000  |
| C | -5.444874000 | -0.029156000 | -0.428252000 |
| C | -5.613316000 | 0.875794000  | -1.485845000 |
| H | -6.165089000 | 0.568240000  | -2.368917000 |
| C | -5.114869000 | 2.175799000  | -1.416788000 |
| H | -5.279085000 | 2.859756000  | -2.245612000 |
| C | -4.448697000 | 2.601011000  | -0.271012000 |
| H | -4.092419000 | 3.624340000  | -0.184792000 |
| C | -4.257207000 | 1.698769000  | 0.776497000  |
| H | -3.733388000 | 2.026217000  | 1.673089000  |
| C | -6.129381000 | -1.923239000 | -1.812789000 |
| H | -6.978046000 | -1.505506000 | -2.382859000 |
| H | -6.304256000 | -3.000041000 | -1.710507000 |
| H | -5.214615000 | -1.777383000 | -2.395208000 |
| C | -7.185409000 | -1.542755000 | 0.307506000  |
| H | -7.076392000 | -1.096742000 | 1.298018000  |
| H | -7.376222000 | -2.614711000 | 0.430257000  |
| H | -8.069088000 | -1.085962000 | -0.170231000 |
| C | 0.624690000  | 1.875013000  | -1.707966000 |
| C | 2.027043000  | 1.633932000  | -1.492469000 |
| C | 2.346370000  | 0.429179000  | -2.216744000 |
| C | 1.164244000  | -0.056207000 | -2.848140000 |
| C | 0.095150000  | 0.824585000  | -2.516131000 |
| C | 3.714734000  | -0.161348000 | -2.415112000 |
| H | 4.173902000  | 0.245304000  | -3.325414000 |
| H | 3.679589000  | -1.248085000 | -2.529795000 |
| H | 4.391403000  | 0.057935000  | -1.585519000 |
| C | 1.087536000  | -1.182615000 | -3.832710000 |
| H | 0.116746000  | -1.687099000 | -3.815403000 |
| H | 1.864182000  | -1.933220000 | -3.663694000 |
| H | 1.230145000  | -0.797646000 | -4.851315000 |
| C | -1.307949000 | 0.725862000  | -3.040807000 |
| H | -1.404535000 | 1.284071000  | -3.981836000 |
| H | -2.051737000 | 1.136783000  | -2.350615000 |
| H | -1.589575000 | -0.310278000 | -3.251011000 |
| C | -0.164112000 | 3.091789000  | -1.307948000 |
| H | -0.027639000 | 3.885112000  | -2.054558000 |
| H | -1.239712000 | 2.891165000  | -1.263363000 |
| H | 0.145533000  | 3.510005000  | -0.347926000 |
| C | -0.751213000 | 0.824119000  | 1.304206000  |
| C | -1.260299000 | -0.416771000 | 1.726509000  |

|    |              |              |              |
|----|--------------|--------------|--------------|
| C  | -0.890890000 | -0.855518000 | 3.009837000  |
| C  | -0.041652000 | -0.109295000 | 3.820943000  |
| C  | 0.481740000  | 1.103998000  | 3.359846000  |
| C  | 0.123068000  | 1.583162000  | 2.101576000  |
| H  | -1.135097000 | 1.266709000  | 0.380636000  |
| H  | -1.277642000 | -1.797687000 | 3.388783000  |
| H  | 0.221618000  | -0.463705000 | 4.813033000  |
| H  | 0.474969000  | 2.554251000  | 1.769221000  |
| C  | -2.102214000 | -1.269217000 | 0.802119000  |
| C  | -3.432145000 | -1.719266000 | 1.427606000  |
| H  | -2.348144000 | -0.661850000 | -0.080826000 |
| H  | -3.241818000 | -2.360081000 | 2.299957000  |
| H  | -3.956515000 | -2.336930000 | 0.691138000  |
| C  | 2.125089000  | -3.313202000 | -1.129843000 |
| C  | 1.257708000  | -2.591058000 | -0.270682000 |
| C  | 1.852287000  | -2.068650000 | 0.914696000  |
| C  | 3.201646000  | -2.284358000 | 1.239358000  |
| C  | 3.999445000  | -3.014579000 | 0.370947000  |
| C  | 3.453483000  | -3.539663000 | -0.811357000 |
| H  | 1.717056000  | -3.745615000 | -2.039134000 |
| H  | 1.212309000  | -1.617692000 | 1.681830000  |
| H  | 3.610805000  | -1.904552000 | 2.170429000  |
| H  | 4.080275000  | -4.134529000 | -1.469196000 |
| C  | -0.095438000 | -2.183955000 | -0.648254000 |
| C  | -1.260157000 | -2.477638000 | 0.321833000  |
| H  | -0.337874000 | -2.500394000 | -1.663971000 |
| H  | -1.947131000 | -3.171579000 | -0.179827000 |
| H  | -0.886977000 | -3.017197000 | 1.203933000  |
| Cl | 5.666898000  | -3.297524000 | 0.747586000  |
| Cl | 1.540089000  | 2.027771000  | 4.370481000  |
| Si | 3.352731000  | 2.735779000  | -0.647425000 |
| C  | 4.128338000  | 1.798338000  | 0.814291000  |
| H  | 4.600023000  | 0.853584000  | 0.522948000  |
| H  | 4.906563000  | 2.419361000  | 1.274311000  |
| H  | 3.389173000  | 1.586502000  | 1.597632000  |
| C  | 4.672486000  | 3.183008000  | -1.928503000 |
| H  | 5.384911000  | 3.888361000  | -1.484474000 |
| H  | 5.239575000  | 2.317356000  | -2.282522000 |
| H  | 4.219438000  | 3.670670000  | -2.798972000 |
| C  | 2.648688000  | 4.362675000  | 0.023599000  |
| H  | 3.493994000  | 4.956504000  | 0.392774000  |
| H  | 2.149369000  | 4.954641000  | -0.749683000 |
| H  | 1.958629000  | 4.237328000  | 0.864862000  |

$pC2^{b_{iso}}$ ,  $E_{(SCF Done)} = -2748.790207$  a.u.

|    |              |              |              |
|----|--------------|--------------|--------------|
| Sc | -0.863129000 | -0.400170000 | -0.129653000 |
| N  | 5.310444000  | 0.564949000  | -0.343202000 |
| C  | 3.545894000  | -0.596850000 | 1.653547000  |
| H  | 4.190935000  | 0.195827000  | 2.043542000  |
| H  | 3.282408000  | -1.238348000 | 2.503996000  |
| C  | 4.256510000  | -1.428312000 | 0.612695000  |
| C  | 5.063677000  | -0.840775000 | -0.389747000 |
| C  | 5.587491000  | -1.651025000 | -1.405067000 |
| H  | 6.209844000  | -1.208524000 | -2.177230000 |
| C  | 5.343081000  | -3.023658000 | -1.434057000 |
| H  | 5.769087000  | -3.629367000 | -2.229807000 |
| C  | 4.582899000  | -3.613415000 | -0.428980000 |
| H  | 4.407118000  | -4.685803000 | -0.425329000 |
| C  | 4.050889000  | -2.811374000 | 0.580911000  |
| H  | 3.452743000  | -3.268017000 | 1.367592000  |
| C  | 5.539647000  | 1.212714000  | -1.624276000 |
| H  | 6.529426000  | 0.997114000  | -2.064808000 |
| H  | 5.475574000  | 2.298329000  | -1.486281000 |
| H  | 4.771058000  | 0.909454000  | -2.341411000 |
| C  | 6.353155000  | 0.941369000  | 0.610998000  |
| H  | 6.200546000  | 0.439052000  | 1.568909000  |
| H  | 6.323327000  | 2.024295000  | 0.778414000  |
| H  | 7.362058000  | 0.675393000  | 0.250707000  |
| C  | -0.752016000 | -1.534905000 | -2.265091000 |
| C  | -2.103779000 | -1.076856000 | -2.082182000 |
| C  | -2.051154000 | 0.362278000  | -2.126280000 |
| C  | -0.694075000 | 0.769261000  | -2.282944000 |
| C  | 0.110449000  | -0.404400000 | -2.380863000 |
| C  | -3.225707000 | 1.296201000  | -2.216718000 |
| H  | -3.554881000 | 1.373595000  | -3.261050000 |
| H  | -2.970325000 | 2.309964000  | -1.895223000 |
| H  | -4.089418000 | 0.959019000  | -1.636702000 |
| C  | -0.194903000 | 2.175375000  | -2.452122000 |
| H  | 0.814186000  | 2.304695000  | -2.046787000 |
| H  | -0.843418000 | 2.910713000  | -1.967519000 |
| H  | -0.145944000 | 2.438448000  | -3.517203000 |
| C  | 1.569047000  | -0.432772000 | -2.725099000 |
| H  | 1.696714000  | -0.452598000 | -3.815921000 |
| H  | 2.084304000  | -1.311157000 | -2.326461000 |
| H  | 2.094723000  | 0.452064000  | -2.355076000 |
| C  | -0.276053000 | -2.950677000 | -2.434662000 |
| H  | -0.251772000 | -3.211117000 | -3.501341000 |
| H  | 0.742229000  | -3.091787000 | -2.056455000 |

|    |              |              |              |
|----|--------------|--------------|--------------|
| H  | -0.925068000 | -3.679306000 | -1.946187000 |
| C  | -0.626268000 | -2.506112000 | 1.221741000  |
| C  | 0.363143000  | -1.585070000 | 1.680916000  |
| C  | 0.296578000  | -1.241618000 | 3.059679000  |
| C  | -0.657067000 | -1.784625000 | 3.902669000  |
| C  | -1.622373000 | -2.680571000 | 3.410518000  |
| C  | -1.600069000 | -3.053096000 | 2.075686000  |
| H  | -0.523174000 | -2.937611000 | 0.221819000  |
| H  | 1.037068000  | -0.564463000 | 3.475527000  |
| H  | -0.661499000 | -1.527380000 | 4.957948000  |
| H  | -2.307023000 | -3.787741000 | 1.702404000  |
| C  | 1.171782000  | -0.898215000 | 0.687478000  |
| C  | 2.261732000  | 0.071751000  | 1.099650000  |
| H  | 1.496227000  | -1.574659000 | -0.112324000 |
| H  | 1.883899000  | 0.775213000  | 1.857732000  |
| H  | 2.558591000  | 0.685683000  | 0.241138000  |
| C  | -2.456088000 | 4.382738000  | 0.256212000  |
| C  | -1.767858000 | 3.351796000  | 0.922358000  |
| C  | -0.505677000 | 3.640743000  | 1.476821000  |
| C  | 0.051900000  | 4.903198000  | 1.358744000  |
| C  | -0.653878000 | 5.908412000  | 0.686137000  |
| C  | -1.911476000 | 5.654753000  | 0.136807000  |
| H  | -3.441986000 | 4.188809000  | -0.159837000 |
| H  | 0.048999000  | 2.876314000  | 2.013736000  |
| H  | 1.023977000  | 5.122354000  | 1.787991000  |
| H  | -2.452559000 | 6.445949000  | -0.371372000 |
| C  | -2.408380000 | 2.049830000  | 1.033543000  |
| C  | -1.966792000 | 0.949892000  | 1.701457000  |
| H  | -3.376617000 | 1.975486000  | 0.539599000  |
| H  | -2.642375000 | 0.105435000  | 1.854980000  |
| H  | -1.084006000 | 0.974213000  | 2.337505000  |
| Si | -3.742763000 | -2.070218000 | -1.974909000 |
| C  | -4.824963000 | -1.619816000 | -3.460772000 |
| H  | -5.741067000 | -2.222011000 | -3.444021000 |
| H  | -5.120543000 | -0.566474000 | -3.470520000 |
| H  | -4.302351000 | -1.833576000 | -4.399787000 |
| C  | -4.635161000 | -1.638779000 | -0.348598000 |
| H  | -4.876296000 | -0.574795000 | -0.249214000 |
| H  | -5.583751000 | -2.186950000 | -0.297076000 |
| H  | -4.046599000 | -1.942372000 | 0.526649000  |
| C  | -3.489970000 | -3.946902000 | -1.980922000 |
| H  | -4.481564000 | -4.414646000 | -1.942064000 |
| H  | -2.997833000 | -4.304254000 | -2.890831000 |
| H  | -2.928656000 | -4.314141000 | -1.114599000 |

|    |              |              |             |
|----|--------------|--------------|-------------|
| Cl | 0.041872000  | 7.482509000  | 0.541851000 |
| Cl | -2.812462000 | -3.340231000 | 4.485500000 |

***p*TS2<sup>b</sup><sub>iso</sub>,  $E_{(\text{SCF Done})} = -2748.771727$  a.u.  $\text{IF} = i-215.81\text{cm}^{-1}$**

|    |              |              |              |
|----|--------------|--------------|--------------|
| Sc | -0.555652000 | -0.590506000 | -0.040972000 |
| N  | 3.591401000  | 3.536366000  | -0.386709000 |
| C  | 0.829216000  | 3.807728000  | -1.311142000 |
| H  | 1.442870000  | 4.414196000  | -1.985657000 |
| H  | -0.200829000 | 4.163709000  | -1.435903000 |
| C  | 1.238523000  | 3.989014000  | 0.134326000  |
| C  | 2.571843000  | 3.800982000  | 0.574152000  |
| C  | 2.850960000  | 3.867800000  | 1.946424000  |
| H  | 3.870226000  | 3.726954000  | 2.293093000  |
| C  | 1.851161000  | 4.144263000  | 2.877797000  |
| H  | 2.102147000  | 4.205879000  | 3.933539000  |
| C  | 0.548288000  | 4.376447000  | 2.447646000  |
| H  | -0.233248000 | 4.628619000  | 3.159430000  |
| C  | 0.258377000  | 4.294121000  | 1.085168000  |
| H  | -0.759241000 | 4.474405000  | 0.742899000  |
| C  | 4.733431000  | 2.770936000  | 0.087982000  |
| H  | 5.417433000  | 3.345584000  | 0.736578000  |
| H  | 5.313591000  | 2.433391000  | -0.778219000 |
| H  | 4.392230000  | 1.890956000  | 0.642343000  |
| C  | 4.044206000  | 4.725444000  | -1.111588000 |
| H  | 3.195323000  | 5.327184000  | -1.441763000 |
| H  | 4.616777000  | 4.420373000  | -1.994416000 |
| H  | 4.686520000  | 5.368302000  | -0.486232000 |
| C  | -1.747465000 | -0.971714000 | 2.066293000  |
| C  | -1.997235000 | -2.073911000 | 1.179479000  |
| C  | -0.739519000 | -2.769910000 | 1.024905000  |
| C  | 0.260326000  | -2.072801000 | 1.756212000  |
| C  | -0.354904000 | -0.937209000 | 2.370057000  |
| C  | -0.540675000 | -4.104129000 | 0.368079000  |
| H  | -0.820700000 | -4.907988000 | 1.060623000  |
| H  | 0.503654000  | -4.265625000 | 0.092960000  |
| H  | -1.151103000 | -4.230670000 | -0.531595000 |
| C  | 1.666094000  | -2.523784000 | 2.018015000  |
| H  | 2.365201000  | -1.686425000 | 2.102639000  |
| H  | 2.045855000  | -3.191730000 | 1.242906000  |
| H  | 1.701809000  | -3.067453000 | 2.971926000  |
| C  | 0.320024000  | 0.010230000  | 3.322326000  |
| H  | 0.223362000  | -0.349270000 | 4.355619000  |
| H  | -0.108241000 | 1.017282000  | 3.291949000  |
| H  | 1.390613000  | 0.103344000  | 3.116352000  |



|    |              |              |              |
|----|--------------|--------------|--------------|
| C  | -2.761632000 | -0.115729000 | 2.767035000  |
| H  | -3.041114000 | -0.595985000 | 3.714432000  |
| H  | -2.368120000 | 0.872178000  | 3.028396000  |
| H  | -3.677601000 | 0.013998000  | 2.192191000  |
| C  | -2.225752000 | 1.654212000  | 0.043224000  |
| C  | -1.426143000 | 1.596548000  | -1.117143000 |
| C  | -2.089408000 | 1.690993000  | -2.369379000 |
| C  | -3.461090000 | 1.839683000  | -2.448033000 |
| C  | -4.230987000 | 1.886790000  | -1.273330000 |
| C  | -3.619698000 | 1.798427000  | -0.032639000 |
| H  | -1.748506000 | 1.737840000  | 1.017333000  |
| H  | -1.512996000 | 1.686292000  | -3.290121000 |
| H  | -3.949457000 | 1.932264000  | -3.413152000 |
| H  | -4.210384000 | 1.893196000  | 0.872039000  |
| C  | 0.033998000  | 1.386138000  | -1.033855000 |
| C  | 0.930014000  | 2.347354000  | -1.799151000 |
| H  | 0.364906000  | 1.416694000  | 0.038228000  |
| H  | 0.677816000  | 2.316718000  | -2.867250000 |
| H  | 1.976602000  | 2.037026000  | -1.704731000 |
| C  | 2.396074000  | -3.492359000 | -1.541061000 |
| C  | 2.041817000  | -2.143813000 | -1.365824000 |
| C  | 3.033047000  | -1.265194000 | -0.895404000 |
| C  | 4.317470000  | -1.710274000 | -0.598040000 |
| C  | 4.634115000  | -3.057055000 | -0.767544000 |
| C  | 3.675660000  | -3.950997000 | -1.245537000 |
| H  | 1.669148000  | -4.190754000 | -1.948395000 |
| H  | 2.808922000  | -0.208161000 | -0.760694000 |
| H  | 5.072139000  | -1.018561000 | -0.237524000 |
| H  | 3.935788000  | -4.993553000 | -1.398995000 |
| C  | 0.695380000  | -1.664531000 | -1.736310000 |
| C  | 0.531302000  | -0.386468000 | -2.293618000 |
| H  | -0.041166000 | -2.428237000 | -1.995752000 |
| H  | -0.343093000 | -0.202972000 | -2.916523000 |
| H  | 1.416883000  | 0.167563000  | -2.586246000 |
| Si | -3.633217000 | -2.663346000 | 0.367377000  |
| C  | -3.938264000 | -4.491118000 | 0.752546000  |
| H  | -4.928456000 | -4.772223000 | 0.374432000  |
| H  | -3.206767000 | -5.164308000 | 0.297877000  |
| H  | -3.936134000 | -4.666298000 | 1.834274000  |
| C  | -3.446874000 | -2.397144000 | -1.511697000 |
| H  | -2.603975000 | -2.954342000 | -1.938278000 |
| H  | -4.349977000 | -2.737508000 | -2.032713000 |
| H  | -3.327243000 | -1.333163000 | -1.761505000 |
| C  | -5.159633000 | -1.708383000 | 0.947291000  |

|    |              |              |              |
|----|--------------|--------------|--------------|
| H  | -6.036746000 | -2.168219000 | 0.475515000  |
| H  | -5.303590000 | -1.771745000 | 2.030771000  |
| H  | -5.152657000 | -0.654463000 | 0.652904000  |
| Cl | 6.232916000  | -3.621530000 | -0.393302000 |
| Cl | -5.945670000 | 2.091830000  | -1.385960000 |

**$pP2^b_{iso}$** ,  $E_{(SCF Done)} = -2748.807625$  a.u.

|    |              |              |              |
|----|--------------|--------------|--------------|
| Sc | 1.351612000  | 0.210350000  | 0.125552000  |
| N  | -5.453012000 | -0.790675000 | -1.927764000 |
| C  | -3.681737000 | -2.662308000 | -0.466746000 |
| H  | -4.265803000 | -3.404471000 | -1.025731000 |
| H  | -3.169833000 | -3.235426000 | 0.317763000  |
| C  | -4.587615000 | -1.649864000 | 0.206501000  |
| C  | -5.393895000 | -0.727442000 | -0.506911000 |
| C  | -6.109203000 | 0.244116000  | 0.208621000  |
| H  | -6.723136000 | 0.958677000  | -0.330522000 |
| C  | -6.075265000 | 0.298373000  | 1.600126000  |
| H  | -6.650322000 | 1.057899000  | 2.123269000  |
| C  | -5.335019000 | -0.641369000 | 2.309828000  |
| H  | -5.326264000 | -0.635140000 | 3.396466000  |
| C  | -4.604417000 | -1.597564000 | 1.605516000  |
| H  | -4.025628000 | -2.336898000 | 2.157493000  |
| C  | -5.763499000 | 0.450675000  | -2.617577000 |
| H  | -6.823238000 | 0.751248000  | -2.540038000 |
| H  | -5.537965000 | 0.325274000  | -3.682603000 |
| H  | -5.142617000 | 1.262834000  | -2.227663000 |
| C  | -6.265345000 | -1.889433000 | -2.446747000 |
| H  | -6.033550000 | -2.822574000 | -1.929843000 |
| H  | -6.056752000 | -2.026255000 | -3.513765000 |
| H  | -7.345465000 | -1.698224000 | -2.326988000 |
| C  | 3.638885000  | -0.179855000 | 0.884436000  |
| C  | 3.641354000  | -0.064554000 | -0.550482000 |
| C  | 3.277270000  | 1.299438000  | -0.850850000 |
| C  | 3.034395000  | 1.986393000  | 0.371412000  |
| C  | 3.229900000  | 1.063621000  | 1.442922000  |
| C  | 3.319679000  | 1.964764000  | -2.195541000 |
| H  | 4.289120000  | 2.457263000  | -2.345453000 |
| H  | 2.551875000  | 2.738180000  | -2.292818000 |
| H  | 3.183138000  | 1.255684000  | -3.015342000 |
| C  | 2.808254000  | 3.457733000  | 0.547308000  |
| H  | 2.009998000  | 3.681839000  | 1.261694000  |
| H  | 2.557911000  | 3.949055000  | -0.394453000 |
| H  | 3.724105000  | 3.927843000  | 0.929223000  |
| C  | 3.139509000  | 1.403977000  | 2.903867000  |

|    |               |               |               |
|----|---------------|---------------|---------------|
| H  | 4. 109496000  | 1. 757068000  | 3. 278801000  |
| H  | 2. 857908000  | 0. 543595000  | 3. 520318000  |
| H  | 2. 416493000  | 2. 204497000  | 3. 092550000  |
| C  | 4. 122064000  | -1. 333770000 | 1. 713944000  |
| H  | 5. 197597000  | -1. 223278000 | 1. 907871000  |
| H  | 3. 632567000  | -1. 373885000 | 2. 691335000  |
| H  | 3. 984267000  | -2. 299146000 | 1. 227161000  |
| C  | -1. 034659000 | -1. 471617000 | 1. 552583000  |
| C  | -0. 765713000 | -1. 583081000 | 0. 175413000  |
| C  | 0. 390119000  | -2. 301564000 | -0. 194564000 |
| C  | 1. 200975000  | -2. 930219000 | 0. 757959000  |
| C  | 0. 873536000  | -2. 841264000 | 2. 114493000  |
| C  | -0. 232711000 | -2. 088857000 | 2. 514923000  |
| H  | -1. 923555000 | -0. 933486000 | 1. 874668000  |
| H  | 0. 631000000  | -2. 426719000 | -1. 247878000 |
| H  | 2. 056251000  | -3. 518218000 | 0. 443104000  |
| H  | -0. 482534000 | -2. 013432000 | 3. 569027000  |
| C  | -1. 702658000 | -0. 999354000 | -0. 863001000 |
| C  | -2. 646854000 | -2. 078103000 | -1. 442142000 |
| H  | -2. 338241000 | -0. 258075000 | -0. 362198000 |
| H  | -2. 044347000 | -2. 899839000 | -1. 853936000 |
| H  | -3. 185272000 | -1. 617012000 | -2. 276089000 |
| C  | -0. 093126000 | 3. 242960000  | -1. 440064000 |
| C  | -0. 244769000 | 1. 939039000  | -0. 905684000 |
| C  | -0. 647141000 | 1. 872335000  | 0. 454646000  |
| C  | -0. 903682000 | 3. 019254000  | 1. 222792000  |
| C  | -0. 761433000 | 4. 269268000  | 0. 642404000  |
| C  | -0. 364585000 | 4. 379928000  | -0. 699591000 |
| H  | 0. 193394000  | 3. 347651000  | -2. 483423000 |
| H  | -0. 933885000 | 0. 918751000  | 0. 901623000  |
| H  | -1. 247068000 | 2. 928678000  | 2. 248791000  |
| H  | -0. 280358000 | 5. 363422000  | -1. 152407000 |
| C  | 0. 136411000  | 0. 728375000  | -1. 659224000 |
| C  | -0. 949747000 | -0. 306489000 | -2. 012927000 |
| H  | 0. 655788000  | 1. 010799000  | -2. 578907000 |
| H  | -0. 476944000 | -1. 074669000 | -2. 641024000 |
| H  | -1. 711962000 | 0. 160197000  | -2. 654513000 |
| Si | 4. 370459000  | -1. 261354000 | -1. 865422000 |
| C  | 5. 860942000  | -0. 398624000 | -2. 653954000 |
| H  | 6. 364553000  | -1. 092784000 | -3. 337264000 |
| H  | 5. 585504000  | 0. 490760000  | -3. 228214000 |
| H  | 6. 586337000  | -0. 097886000 | -1. 889760000 |
| C  | 3. 093775000  | -1. 702300000 | -3. 204565000 |
| H  | 2. 571302000  | -0. 832239000 | -3. 615125000 |

|    |              |              |              |
|----|--------------|--------------|--------------|
| H  | 3.607708000  | -2.198762000 | -4.036692000 |
| H  | 2.339847000  | -2.406181000 | -2.832184000 |
| C  | 4.997241000  | -2.893508000 | -1.130687000 |
| H  | 5.455846000  | -3.464352000 | -1.947728000 |
| H  | 5.767910000  | -2.742516000 | -0.368603000 |
| H  | 4.209319000  | -3.525059000 | -0.706036000 |
| Cl | -1.092412000 | 5.701210000  | 1.562005000  |
| Cl | 1.808817000  | -3.691386000 | 3.293235000  |

**pC1<sup>a</sup>**,  $E_{(\text{SCF Done})} = -2023.442292$  a.u.

|    |              |              |              |
|----|--------------|--------------|--------------|
| Sc | 0.975432000  | 0.702958000  | 0.598819000  |
| Si | 0.640906000  | 3.089975000  | -1.074405000 |
| C  | 1.611830000  | 2.770513000  | 0.502349000  |
| H  | 1.207569000  | 3.349891000  | 1.346768000  |
| H  | 2.669145000  | 3.029940000  | 0.390679000  |
| C  | -0.245855000 | 1.356765000  | -1.453312000 |
| H  | 0.401459000  | 0.475370000  | -1.645765000 |
| H  | -0.742775000 | 1.500080000  | -2.419716000 |
| H  | -1.068083000 | 1.060326000  | -0.775500000 |
| C  | -0.779696000 | 4.326084000  | -0.913370000 |
| H  | -1.418183000 | 4.115247000  | -0.047858000 |
| H  | -1.410232000 | 4.333975000  | -1.809534000 |
| H  | -0.372172000 | 5.334546000  | -0.779922000 |
| C  | 1.716108000  | 3.438115000  | -2.584672000 |
| H  | 2.198932000  | 4.415780000  | -2.475023000 |
| H  | 1.122139000  | 3.457704000  | -3.505165000 |
| H  | 2.507326000  | 2.690189000  | -2.702179000 |
| C  | 3.105218000  | -0.272537000 | 0.022005000  |
| C  | 3.198137000  | 0.069817000  | 1.398302000  |
| C  | 2.260049000  | -0.739530000 | 2.113329000  |
| C  | 1.603724000  | -1.586983000 | 1.177043000  |
| C  | 2.101152000  | -1.295442000 | -0.141680000 |
| C  | 0.646273000  | -2.688577000 | 1.542068000  |
| H  | 1.124789000  | -3.667603000 | 1.412079000  |
| H  | 0.343662000  | -2.631344000 | 2.592100000  |
| H  | -0.257723000 | -2.694695000 | 0.925258000  |
| C  | 3.980953000  | 0.309254000  | -1.050991000 |
| H  | 3.468051000  | 0.395023000  | -2.011286000 |
| H  | 4.351131000  | 1.301425000  | -0.777604000 |
| H  | 4.861183000  | -0.327176000 | -1.212867000 |
| C  | 4.183514000  | 1.005804000  | 2.031845000  |
| H  | 4.588862000  | 1.724529000  | 1.315492000  |
| H  | 3.743364000  | 1.576501000  | 2.855913000  |
| H  | 5.032174000  | 0.443059000  | 2.442925000  |

|    |              |              |              |
|----|--------------|--------------|--------------|
| C  | 2.120661000  | -0.764410000 | 3.609466000  |
| H  | 1.135284000  | -1.107999000 | 3.940350000  |
| H  | 2.858024000  | -1.448274000 | 4.050148000  |
| H  | 2.301143000  | 0.219101000  | 4.056625000  |
| C  | -3.364116000 | -1.348465000 | 1.213799000  |
| C  | -2.822417000 | -0.060225000 | 1.379342000  |
| C  | -3.509546000 | 1.031995000  | 0.813043000  |
| C  | -4.676899000 | 0.841912000  | 0.091510000  |
| C  | -5.182567000 | -0.453773000 | -0.072602000 |
| C  | -4.532279000 | -1.552592000 | 0.491795000  |
| H  | -2.865073000 | -2.202544000 | 1.665231000  |
| H  | -3.147007000 | 2.045624000  | 0.959198000  |
| H  | -5.209770000 | 1.686176000  | -0.333397000 |
| H  | -4.944065000 | -2.548912000 | 0.370374000  |
| C  | -1.597128000 | 0.087196000  | 2.151655000  |
| C  | -0.843626000 | 1.205296000  | 2.327693000  |
| H  | -1.260318000 | -0.822883000 | 2.648165000  |
| H  | -0.036899000 | 1.203354000  | 3.062444000  |
| H  | -1.146401000 | 2.180037000  | 1.947952000  |
| Cl | -6.637246000 | -0.689099000 | -0.971621000 |
| Si | 1.770992000  | -2.387929000 | -1.685474000 |
| C  | 2.269035000  | -1.549861000 | -3.312776000 |
| H  | 3.350852000  | -1.416114000 | -3.405231000 |
| H  | 1.953879000  | -2.207649000 | -4.132214000 |
| H  | 1.784857000  | -0.580269000 | -3.476665000 |
| C  | 2.794525000  | -3.966987000 | -1.479367000 |
| H  | 2.518098000  | -4.519249000 | -0.574925000 |
| H  | 2.640960000  | -4.632191000 | -2.337159000 |
| H  | 3.863988000  | -3.737564000 | -1.419138000 |
| C  | -0.071203000 | -2.837278000 | -1.836640000 |
| H  | -0.380475000 | -3.595833000 | -1.111253000 |
| H  | -0.736310000 | -1.971268000 | -1.733452000 |
| H  | -0.243930000 | -3.258941000 | -2.834179000 |

***p*TS1<sup>a'</sup>**,  $E_{(\text{SCF Done})} = -2023.431289$  a.u. **IF = *i*211.80 cm<sup>-1</sup>**

|    |              |             |              |
|----|--------------|-------------|--------------|
| Sc | 0.670289000  | 0.517097000 | 0.519006000  |
| Si | 1.204542000  | 2.901303000 | -1.275675000 |
| C  | 1.600328000  | 2.520505000 | 0.558489000  |
| H  | 1.826106000  | 3.472321000 | 1.043904000  |
| H  | 2.527530000  | 1.923278000 | 0.660076000  |
| C  | 0.300580000  | 1.359581000 | -2.006075000 |
| H  | 0.919777000  | 0.455938000 | -2.093020000 |
| H  | 0.046595000  | 1.619625000 | -3.041588000 |
| H  | -0.674421000 | 1.103591000 | -1.558625000 |

|   |              |              |              |
|---|--------------|--------------|--------------|
| C | 0.073223000  | 4.408219000  | -1.388268000 |
| H | -0.850768000 | 4.316484000  | -0.808515000 |
| H | -0.204925000 | 4.593711000  | -2.432015000 |
| H | 0.603974000  | 5.296714000  | -1.027222000 |
| C | 2.771720000  | 3.173220000  | -2.293316000 |
| H | 3.341351000  | 4.020245000  | -1.895686000 |
| H | 2.516919000  | 3.400014000  | -3.335374000 |
| H | 3.423250000  | 2.293853000  | -2.287277000 |
| C | 2.456972000  | -0.983802000 | -0.155231000 |
| C | 2.764529000  | -0.592490000 | 1.180698000  |
| C | 1.757706000  | -1.124543000 | 2.039784000  |
| C | 0.830966000  | -1.843094000 | 1.235222000  |
| C | 1.238517000  | -1.750365000 | -0.144186000 |
| C | -0.269219000 | -2.707178000 | 1.781599000  |
| H | 0.101367000  | -3.729258000 | 1.931126000  |
| H | -0.622300000 | -2.358884000 | 2.756471000  |
| H | -1.132611000 | -2.767909000 | 1.114750000  |
| C | 3.374218000  | -0.739822000 | -1.321620000 |
| H | 2.847182000  | -0.625019000 | -2.270772000 |
| H | 3.996646000  | 0.147641000  | -1.171403000 |
| H | 4.061532000  | -1.587478000 | -1.442279000 |
| C | 4.018177000  | 0.087186000  | 1.652798000  |
| H | 4.479603000  | 0.710926000  | 0.880574000  |
| H | 3.842823000  | 0.717869000  | 2.530803000  |
| H | 4.767616000  | -0.661364000 | 1.942230000  |
| C | 1.807149000  | -1.077356000 | 3.538841000  |
| H | 0.847947000  | -1.331399000 | 3.999243000  |
| H | 2.538863000  | -1.804140000 | 3.915552000  |
| H | 2.114243000  | -0.096392000 | 3.918954000  |
| C | -2.653562000 | -0.240328000 | 1.901296000  |
| C | -1.820817000 | 0.856637000  | 1.583557000  |
| C | -2.200513000 | 1.658007000  | 0.484494000  |
| C | -3.352360000 | 1.386583000  | -0.255330000 |
| C | -4.151470000 | 0.301452000  | 0.092586000  |
| C | -3.804770000 | -0.510576000 | 1.179593000  |
| H | -2.410553000 | -0.860280000 | 2.758824000  |
| H | -1.631626000 | 2.551414000  | 0.239775000  |
| H | -3.639075000 | 2.028975000  | -1.082040000 |
| H | -4.446683000 | -1.340370000 | 1.458113000  |
| C | -0.610252000 | 1.125019000  | 2.364109000  |
| C | 0.118260000  | 2.310377000  | 2.282375000  |
| H | -0.358460000 | 0.415747000  | 3.147259000  |
| H | 0.901543000  | 2.483847000  | 3.013207000  |
| H | -0.330427000 | 3.211316000  | 1.876367000  |

|    |              |              |              |
|----|--------------|--------------|--------------|
| Cl | -5.588285000 | -0.038042000 | -0.808974000 |
| Si | 0.422447000  | -2.767592000 | -1.557112000 |
| C  | 1.290853000  | -2.553140000 | -3.227924000 |
| H  | 2.343593000  | -2.851004000 | -3.202451000 |
| H  | 0.783900000  | -3.212690000 | -3.943328000 |
| H  | 1.224213000  | -1.536844000 | -3.631518000 |
| C  | 0.524982000  | -4.599959000 | -1.089993000 |
| H  | -0.089350000 | -4.855316000 | -0.221592000 |
| H  | 0.174925000  | -5.208415000 | -1.932401000 |
| H  | 1.558423000  | -4.892893000 | -0.874257000 |
| C  | -1.388614000 | -2.246088000 | -1.796929000 |
| H  | -1.969972000 | -2.238312000 | -0.869329000 |
| H  | -1.462629000 | -1.250783000 | -2.250402000 |
| H  | -1.878805000 | -2.947317000 | -2.483115000 |

**$pP1^a$** ,  $E_{(\text{SCF Done})} = -2023.458019$  a.u.

|    |              |              |              |
|----|--------------|--------------|--------------|
| Sc | -0.280418000 | -0.467558000 | 0.446874000  |
| Si | -1.613735000 | -2.735036000 | -1.317574000 |
| C  | -1.393178000 | -2.776556000 | 0.611478000  |
| H  | -2.054600000 | -3.629376000 | 0.820675000  |
| H  | -1.948944000 | -1.964998000 | 1.131338000  |
| C  | -1.073403000 | -1.045441000 | -2.061178000 |
| H  | -1.676605000 | -0.191705000 | -1.721274000 |
| H  | -1.285382000 | -1.120293000 | -3.135660000 |
| H  | -0.003495000 | -0.786098000 | -2.024613000 |
| C  | -0.620264000 | -4.137421000 | -2.091276000 |
| H  | 0.460219000  | -4.059468000 | -1.931730000 |
| H  | -0.795322000 | -4.162074000 | -3.172974000 |
| H  | -0.947299000 | -5.100461000 | -1.682745000 |
| C  | -3.458608000 | -2.911074000 | -1.655587000 |
| H  | -3.831502000 | -3.872946000 | -1.286342000 |
| H  | -3.657008000 | -2.869987000 | -2.732572000 |
| H  | -4.040259000 | -2.116162000 | -1.176697000 |
| C  | -2.167803000 | 0.983337000  | 0.891310000  |
| C  | -1.694038000 | 0.565160000  | 2.170814000  |
| C  | -0.381312000 | 1.089189000  | 2.349196000  |
| C  | -0.036158000 | 1.814145000  | 1.173410000  |
| C  | -1.140668000 | 1.761077000  | 0.247347000  |
| C  | 1.222182000  | 2.624483000  | 1.025246000  |
| H  | 1.104349000  | 3.596628000  | 1.521426000  |
| H  | 2.085949000  | 2.133740000  | 1.482649000  |
| H  | 1.473180000  | 2.821744000  | -0.019207000 |
| C  | -3.561635000 | 0.721650000  | 0.388860000  |
| H  | -3.614748000 | 0.625853000  | -0.698063000 |

|    |              |              |              |
|----|--------------|--------------|--------------|
| H  | -3.993934000 | -0.183519000 | 0.828326000  |
| H  | -4.227317000 | 1.549475000  | 0.666119000  |
| C  | -2.462756000 | -0.185209000 | 3.220200000  |
| H  | -3.303961000 | -0.748591000 | 2.804879000  |
| H  | -1.827146000 | -0.888214000 | 3.769784000  |
| H  | -2.882961000 | 0.511284000  | 3.957604000  |
| C  | 0.406798000  | 1.046138000  | 3.622184000  |
| H  | 0.208543000  | 0.140799000  | 4.203610000  |
| H  | 1.483812000  | 1.108165000  | 3.443862000  |
| H  | 0.138309000  | 1.901007000  | 4.257374000  |
| C  | 2.984211000  | -0.657681000 | 1.630468000  |
| C  | 1.930541000  | -1.418197000 | 1.048630000  |
| C  | 1.953187000  | -1.539976000 | -0.368511000 |
| C  | 2.960465000  | -0.948835000 | -1.155047000 |
| C  | 3.957644000  | -0.212242000 | -0.541203000 |
| C  | 3.977442000  | -0.085702000 | 0.861321000  |
| H  | 3.028363000  | -0.566875000 | 2.712144000  |
| H  | 1.299590000  | -2.268610000 | -0.849360000 |
| H  | 2.976577000  | -1.098769000 | -2.230439000 |
| H  | 4.789667000  | 0.458543000  | 1.334041000  |
| C  | 0.776593000  | -1.855653000 | 1.796586000  |
| C  | -0.035762000 | -3.071738000 | 1.342808000  |
| H  | 0.855289000  | -1.742204000 | 2.874953000  |
| H  | -0.289016000 | -3.635134000 | 2.246359000  |
| H  | 0.562362000  | -3.748616000 | 0.718476000  |
| Si | -1.260543000 | 2.888950000  | -1.305700000 |
| C  | -2.906546000 | 2.706498000  | -2.227822000 |
| H  | -3.772675000 | 2.932249000  | -1.598316000 |
| H  | -2.900829000 | 3.436906000  | -3.046449000 |
| H  | -3.054154000 | 1.720973000  | -2.683400000 |
| C  | -1.130978000 | 4.677270000  | -0.699532000 |
| H  | -0.162718000 | 4.896634000  | -0.239661000 |
| H  | -1.261201000 | 5.364322000  | -1.544023000 |
| H  | -1.912872000 | 4.898299000  | 0.035491000  |
| C  | 0.118164000  | 2.524196000  | -2.563048000 |
| H  | 1.127441000  | 2.562704000  | -2.141217000 |
| H  | -0.014204000 | 1.548292000  | -3.044065000 |
| H  | 0.072749000  | 3.279967000  | -3.356814000 |
| Cl | 5.210336000  | 0.525055000  | -1.485407000 |

$pC2^a_{\text{syn}}, E_{(\text{SCF Done})} = -2792.555247 \text{ a.u.}$

|    |             |              |              |
|----|-------------|--------------|--------------|
| Sc | 0.665751000 | 0.629997000  | -0.221214000 |
| Si | 5.572584000 | -1.376879000 | 1.185905000  |
| C  | 3.836495000 | -0.884374000 | 0.518837000  |



|   |               |               |               |
|---|---------------|---------------|---------------|
| C | 6. 760466000  | 0. 086305000  | 0. 983291000  |
| C | 6. 211665000  | -2. 879335000 | 0. 223615000  |
| C | 5. 379130000  | -1. 814519000 | 3. 019901000  |
| C | 3. 171859000  | 3. 119094000  | -0. 627234000 |
| C | 1. 759474000  | 2. 821411000  | -0. 223118000 |
| C | 1. 295817000  | 2. 589822000  | 1. 106786000  |
| C | -0. 131078000 | 2. 551371000  | 1. 080076000  |
| C | -0. 572970000 | 2. 712764000  | -0. 278406000 |
| C | 0. 616504000  | 2. 889567000  | -1. 070559000 |
| C | 2. 156638000  | 2. 546797000  | 2. 338089000  |
| C | -0. 983644000 | 2. 551009000  | 2. 317418000  |
| C | 0. 680854000  | 3. 217685000  | -2. 536478000 |
| C | 3. 787971000  | -0. 444783000 | -0. 955213000 |
| C | 2. 411699000  | -0. 059724000 | -1. 482819000 |
| H | 3. 464204000  | -0. 067924000 | 1. 161566000  |
| H | 3. 172197000  | -1. 744943000 | 0. 689564000  |
| H | 6. 888162000  | 0. 366243000  | -0. 068628000 |
| H | 7. 751052000  | -0. 171063000 | 1. 375528000  |
| H | 6. 411123000  | 0. 969971000  | 1. 530692000  |
| H | 5. 531533000  | -3. 734589000 | 0. 313481000  |
| H | 7. 186031000  | -3. 193172000 | 0. 615649000  |
| H | 6. 343485000  | -2. 659726000 | -0. 841885000 |
| H | 5. 006021000  | -0. 963241000 | 3. 601641000  |
| H | 6. 343094000  | -2. 109041000 | 3. 450427000  |
| H | 4. 686180000  | -2. 652278000 | 3. 161728000  |
| H | 3. 902684000  | 2. 615450000  | 0. 011769000  |
| H | 3. 365622000  | 4. 197630000  | -0. 553416000 |
| H | 3. 376212000  | 2. 827452000  | -1. 661807000 |
| H | 3. 185600000  | 2. 254478000  | 2. 108591000  |
| H | 1. 775970000  | 1. 854450000  | 3. 097168000  |
| H | 2. 203903000  | 3. 537951000  | 2. 808382000  |
| H | -0. 445497000 | 2. 146261000  | 3. 180336000  |
| H | -1. 914199000 | 1. 994210000  | 2. 195083000  |
| H | -1. 256903000 | 3. 581483000  | 2. 580137000  |
| H | -0. 237033000 | 2. 948657000  | -3. 065129000 |
| H | 1. 517111000  | 2. 721860000  | -3. 042402000 |
| H | 0. 828040000  | 4. 296611000  | -2. 675820000 |
| H | 4. 228301000  | -1. 234175000 | -1. 584851000 |
| H | 4. 448940000  | 0. 419309000  | -1. 082262000 |
| H | 2. 441344000  | 0. 757407000  | -2. 212875000 |
| C | 1. 604587000  | -2. 471942000 | -1. 637737000 |
| C | 1. 453382000  | -1. 078773000 | -1. 871624000 |
| C | 0. 170460000  | -0. 656254000 | -2. 331530000 |
| C | -0. 876037000 | -1. 560910000 | -2. 573610000 |

|    |              |              |              |
|----|--------------|--------------|--------------|
| C  | -0.672591000 | -2.912056000 | -2.336373000 |
| C  | 0.576995000  | -3.366934000 | -1.881176000 |
| H  | 2.564890000  | -2.853644000 | -1.305221000 |
| H  | 0.042936000  | 0.374230000  | -2.683709000 |
| H  | -1.821337000 | -1.210407000 | -2.975528000 |
| H  | 0.733571000  | -4.431311000 | -1.731686000 |
| C  | -3.277316000 | -0.584288000 | 2.790002000  |
| C  | -2.344439000 | -1.115256000 | 1.879080000  |
| C  | -2.819496000 | -1.937406000 | 0.838442000  |
| C  | -4.171819000 | -2.206128000 | 0.704663000  |
| C  | -5.077555000 | -1.657991000 | 1.621270000  |
| C  | -4.634962000 | -0.849502000 | 2.669613000  |
| H  | -2.931119000 | 0.034184000  | 3.614676000  |
| H  | -2.128684000 | -2.384782000 | 0.130439000  |
| H  | -4.531337000 | -2.844592000 | -0.095496000 |
| H  | -5.346590000 | -0.442428000 | 3.380133000  |
| C  | -0.934591000 | -0.828350000 | 2.087472000  |
| C  | 0.137005000  | -1.271445000 | 1.374386000  |
| H  | -0.725835000 | -0.201125000 | 2.953343000  |
| H  | 1.138906000  | -1.129543000 | 1.784864000  |
| H  | 0.042606000  | -2.012165000 | 0.580367000  |
| Cl | -6.763102000 | -1.995984000 | 1.455026000  |
| Cl | -1.949200000 | -4.053015000 | -2.629826000 |
| Si | -2.349613000 | 3.032668000  | -0.938918000 |
| C  | -3.674273000 | 2.891794000  | 0.406294000  |
| H  | -3.523060000 | 3.600200000  | 1.226423000  |
| H  | -4.639573000 | 3.131302000  | -0.056823000 |
| H  | -3.757104000 | 1.882971000  | 0.824443000  |
| C  | -2.817948000 | 1.783471000  | -2.293223000 |
| H  | -2.128901000 | 1.771308000  | -3.144578000 |
| H  | -2.887251000 | 0.769096000  | -1.882528000 |
| H  | -3.809159000 | 2.040430000  | -2.685898000 |
| C  | -2.394640000 | 4.796951000  | -1.624102000 |
| H  | -3.411884000 | 5.035723000  | -1.956583000 |
| H  | -2.118646000 | 5.521234000  | -0.849556000 |
| H  | -1.724690000 | 4.943609000  | -2.476660000 |

***p*TS2<sup>a'</sup><sub>syn</sub>,  $E_{(\text{SCF Done})} = -2792.533793$  a.u. IF =  $i144.69$  cm<sup>-1</sup>**

|    |              |              |              |
|----|--------------|--------------|--------------|
| Sc | -0.178968000 | -0.685259000 | 0.054823000  |
| Si | 6.283937000  | 0.125146000  | -0.616909000 |
| C  | 4.467481000  | 0.641266000  | -0.242556000 |
| C  | 6.292195000  | -1.230001000 | -1.944031000 |
| C  | 7.103179000  | -0.510319000 | 0.968838000  |
| C  | 7.179168000  | 1.665283000  | -1.257102000 |

|   |              |              |              |
|---|--------------|--------------|--------------|
| C | 1.071154000  | -3.379357000 | 2.081933000  |
| C | -0.045021000 | -2.880904000 | 1.208097000  |
| C | -0.188181000 | -3.145325000 | -0.185051000 |
| C | -1.469396000 | -2.671577000 | -0.593214000 |
| C | -2.119482000 | -2.060516000 | 0.536661000  |
| C | -1.222900000 | -2.216638000 | 1.652980000  |
| C | 0.792048000  | -3.916718000 | -1.020698000 |
| C | -2.084529000 | -2.966624000 | -1.929808000 |
| C | -1.536673000 | -1.940682000 | 3.097321000  |
| C | 3.600200000  | -0.476438000 | 0.347568000  |
| C | 2.100982000  | -0.260602000 | 0.580125000  |
| H | 4.054602000  | 1.031884000  | -1.182302000 |
| H | 4.522195000  | 1.486633000  | 0.455234000  |
| H | 5.796049000  | -2.147220000 | -1.605806000 |
| H | 7.323474000  | -1.497803000 | -2.201779000 |
| H | 5.801917000  | -0.895125000 | -2.865827000 |
| H | 7.079664000  | 0.244340000  | 1.763452000  |
| H | 8.154357000  | -0.756612000 | 0.779624000  |
| H | 6.618724000  | -1.417571000 | 1.347656000  |
| H | 6.706497000  | 2.054681000  | -2.166207000 |
| H | 8.222137000  | 1.432774000  | -1.500530000 |
| H | 7.185039000  | 2.466483000  | -0.509224000 |
| H | 2.003093000  | -3.521108000 | 1.525516000  |
| H | 0.806040000  | -4.355178000 | 2.509889000  |
| H | 1.281785000  | -2.713062000 | 2.925765000  |
| H | 1.830975000  | -3.687718000 | -0.758825000 |
| H | 0.670195000  | -3.724682000 | -2.090704000 |
| H | 0.657642000  | -4.996721000 | -0.875253000 |
| H | -1.330180000 | -3.121840000 | -2.707615000 |
| H | -2.763959000 | -2.181467000 | -2.262830000 |
| H | -2.665421000 | -3.896626000 | -1.872578000 |
| H | -2.185991000 | -1.071712000 | 3.232055000  |
| H | -0.636098000 | -1.786918000 | 3.701856000  |
| H | -2.054697000 | -2.801875000 | 3.537979000  |
| H | 4.022965000  | -0.739612000 | 1.329451000  |
| H | 3.704529000  | -1.388711000 | -0.255731000 |
| H | 1.741793000  | -1.166879000 | 1.105388000  |
| C | 1.808494000  | 2.263125000  | 0.806069000  |
| C | 1.517260000  | 0.925560000  | 1.195416000  |
| C | 0.443063000  | 0.752924000  | 2.113008000  |
| C | -0.341109000 | 1.831061000  | 2.553756000  |
| C | -0.035885000 | 3.114726000  | 2.126959000  |
| C | 1.063152000  | 3.329755000  | 1.276741000  |
| H | 2.631962000  | 2.461258000  | 0.130155000  |

|    |              |              |              |
|----|--------------|--------------|--------------|
| H  | 0.318134000  | -0.204882000 | 2.612369000  |
| H  | -1.144818000 | 1.668899000  | 3.264919000  |
| H  | 1.314513000  | 4.342993000  | 0.977521000  |
| C  | -1.896441000 | 0.256735000  | -3.157295000 |
| C  | -0.826949000 | 0.435828000  | -2.250383000 |
| C  | -0.924712000 | 1.508860000  | -1.334727000 |
| C  | -2.024890000 | 2.374616000  | -1.334182000 |
| C  | -3.045753000 | 2.179834000  | -2.255809000 |
| C  | -2.976003000 | 1.122604000  | -3.175927000 |
| H  | -1.844446000 | -0.544364000 | -3.888718000 |
| H  | -0.079580000 | 1.774149000  | -0.692573000 |
| H  | -2.067965000 | 3.205866000  | -0.637905000 |
| H  | -3.769527000 | 0.994485000  | -3.905625000 |
| C  | 0.309302000  | -0.482057000 | -2.227968000 |
| C  | 1.563119000  | -0.142207000 | -1.727124000 |
| H  | 0.192160000  | -1.430579000 | -2.743381000 |
| H  | 2.391078000  | -0.815074000 | -1.918487000 |
| H  | 1.829368000  | 0.903409000  | -1.602772000 |
| Si | -3.949180000 | -1.502295000 | 0.732219000  |
| C  | -4.911658000 | -1.509427000 | -0.897338000 |
| H  | -4.977004000 | -2.505197000 | -1.346466000 |
| H  | -5.935279000 | -1.183492000 | -0.675070000 |
| H  | -4.502500000 | -0.814860000 | -1.637712000 |
| C  | -4.795934000 | -2.723508000 | 1.907717000  |
| H  | -4.398248000 | -2.682034000 | 2.926258000  |
| H  | -5.866718000 | -2.493528000 | 1.962420000  |
| H  | -4.694616000 | -3.752512000 | 1.545026000  |
| C  | -4.049752000 | 0.258418000  | 1.439216000  |
| H  | -3.628407000 | 0.349585000  | 2.445631000  |
| H  | -3.549786000 | 0.985055000  | 0.788647000  |
| H  | -5.103928000 | 0.553938000  | 1.504761000  |
| Cl | -4.406042000 | 3.248665000  | -2.281441000 |
| Cl | -0.975318000 | 4.464446000  | 2.670357000  |

$pP2^{a'}_{\text{syn}}, E_{(\text{SCF Done})} = -2792.569233 \text{ a.u.}$

|    |              |              |              |
|----|--------------|--------------|--------------|
| Sc | -0.613021000 | -0.628179000 | 0.008753000  |
| Si | 6.489916000  | -0.266847000 | -0.614128000 |
| C  | 4.640431000  | 0.261243000  | -0.689599000 |
| C  | 6.738427000  | -1.845769000 | -1.633402000 |
| C  | 6.984446000  | -0.567267000 | 1.190964000  |
| C  | 7.508563000  | 1.150820000  | -1.346142000 |
| C  | 0.609724000  | -3.232345000 | 2.143001000  |
| C  | -0.550348000 | -2.685336000 | 1.359587000  |
| C  | -0.897005000 | -3.074758000 | 0.028908000  |

|   |              |              |              |
|---|--------------|--------------|--------------|
| C | -2.151911000 | -2.483223000 | -0.286048000 |
| C | -2.588998000 | -1.688758000 | 0.833272000  |
| C | -1.587262000 | -1.845594000 | 1.856739000  |
| C | -0.143275000 | -4.069648000 | -0.802615000 |
| C | -2.918782000 | -2.784693000 | -1.540945000 |
| C | -1.667784000 | -1.344998000 | 3.272665000  |
| C | 3.663566000  | -0.761675000 | -0.113069000 |
| C | 2.145593000  | -0.435368000 | -0.250374000 |
| H | 4.409375000  | 0.470713000  | -1.743820000 |
| H | 4.564616000  | 1.215555000  | -0.151471000 |
| H | 6.182445000  | -2.696710000 | -1.223026000 |
| H | 7.798385000  | -2.124992000 | -1.643096000 |
| H | 6.426422000  | -1.705834000 | -2.674977000 |
| H | 6.820400000  | 0.325585000  | 1.805537000  |
| H | 8.049243000  | -0.819464000 | 1.254614000  |
| H | 6.425705000  | -1.396395000 | 1.640301000  |
| H | 7.230330000  | 1.349113000  | -2.387597000 |
| H | 8.576702000  | 0.905639000  | -1.330202000 |
| H | 7.373858000  | 2.078091000  | -0.777441000 |
| H | 1.485459000  | -3.428537000 | 1.515417000  |
| H | 0.332340000  | -4.189163000 | 2.604850000  |
| H | 0.924026000  | -2.574151000 | 2.960239000  |
| H | 0.939292000  | -3.999968000 | -0.653540000 |
| H | -0.338299000 | -3.948121000 | -1.871339000 |
| H | -0.437988000 | -5.093281000 | -0.535293000 |
| H | -2.253797000 | -3.054394000 | -2.366506000 |
| H | -3.541695000 | -1.951911000 | -1.867533000 |
| H | -3.581211000 | -3.644497000 | -1.373389000 |
| H | -2.205082000 | -0.396579000 | 3.356005000  |
| H | -0.679922000 | -1.214675000 | 3.728062000  |
| H | -2.200705000 | -2.071888000 | 3.898976000  |
| H | 3.876845000  | -0.919543000 | 0.951941000  |
| H | 3.809130000  | -1.732918000 | -0.605512000 |
| H | 1.657361000  | -1.338678000 | 0.183612000  |
| C | 2.009605000  | 2.081861000  | 0.224036000  |
| C | 1.722650000  | 0.753207000  | 0.593093000  |
| C | 1.003358000  | 0.558275000  | 1.786512000  |
| C | 0.556426000  | 1.630787000  | 2.570288000  |
| C | 0.856839000  | 2.929562000  | 2.173442000  |
| C | 1.598164000  | 3.153971000  | 1.006925000  |
| H | 2.563870000  | 2.284395000  | -0.686671000 |
| H | 0.862366000  | -0.454596000 | 2.168862000  |
| H | 0.010951000  | 1.453077000  | 3.491314000  |
| H | 1.840878000  | 4.170713000  | 0.713427000  |

|    |              |              |              |
|----|--------------|--------------|--------------|
| C  | -1.850008000 | -0.039843000 | -3.236475000 |
| C  | -0.790027000 | 0.220751000  | -2.325663000 |
| C  | -0.912393000 | 1.406478000  | -1.548917000 |
| C  | -1.993206000 | 2.293400000  | -1.700956000 |
| C  | -2.988519000 | 2.003475000  | -2.618479000 |
| C  | -2.909179000 | 0.833250000  | -3.394498000 |
| H  | -1.798506000 | -0.929347000 | -3.858139000 |
| H  | -0.071110000 | 1.748479000  | -0.942364000 |
| H  | -2.029556000 | 3.213896000  | -1.126536000 |
| H  | -3.681330000 | 0.628087000  | -4.130054000 |
| C  | 0.239628000  | -0.761770000 | -2.031781000 |
| C  | 1.688638000  | -0.338487000 | -1.741546000 |
| H  | 0.172973000  | -1.654929000 | -2.650463000 |
| H  | 2.341789000  | -1.010564000 | -2.309677000 |
| H  | 1.889454000  | 0.672026000  | -2.119044000 |
| Si | -4.270534000 | -0.803200000 | 1.126327000  |
| C  | -5.423947000 | -0.895634000 | -0.369752000 |
| H  | -5.656048000 | -1.925050000 | -0.659383000 |
| H  | -6.368758000 | -0.413231000 | -0.090371000 |
| H  | -5.035620000 | -0.362515000 | -1.243552000 |
| C  | -5.129916000 | -1.654169000 | 2.583736000  |
| H  | -4.585975000 | -1.543842000 | 3.526689000  |
| H  | -6.126352000 | -1.218389000 | 2.723738000  |
| H  | -5.259176000 | -2.724734000 | 2.389345000  |
| C  | -3.983526000 | 1.036321000  | 1.510180000  |
| H  | -3.396097000 | 1.214016000  | 2.417338000  |
| H  | -3.491053000 | 1.545906000  | 0.673377000  |
| H  | -4.953630000 | 1.526816000  | 1.656050000  |
| Cl | -4.324120000 | 3.087246000  | -2.834044000 |
| Cl | 0.327059000  | 4.270685000  | 3.127466000  |

**pC2<sup>a'</sup><sub>iso</sub>**,  $E_{(\text{SCF Done})} = -2792.549432$  a.u.

|    |              |              |              |
|----|--------------|--------------|--------------|
| Sc | -0.848154000 | -0.258586000 | 0.156297000  |
| Si | 3.507853000  | 3.972876000  | 0.062776000  |
| C  | 1.782850000  | 3.446261000  | 0.710169000  |
| C  | 3.596545000  | 3.682000000  | -1.813801000 |
| C  | 4.847563000  | 2.945425000  | 0.931684000  |
| C  | 3.750844000  | 5.811362000  | 0.440895000  |
| C  | -1.326276000 | 0.016414000  | 3.686303000  |
| C  | -1.506837000 | -0.819691000 | 2.455451000  |
| C  | -0.608248000 | -1.835699000 | 2.014171000  |
| C  | -1.232341000 | -2.539449000 | 0.943828000  |
| C  | -2.507644000 | -1.932471000 | 0.667069000  |
| C  | -2.673505000 | -0.880965000 | 1.634634000  |

|   |              |              |              |
|---|--------------|--------------|--------------|
| C | 0.714156000  | -2.163728000 | 2.646077000  |
| C | -0.725209000 | -3.836890000 | 0.380419000  |
| C | -3.925234000 | -0.086966000 | 1.882318000  |
| C | 1.357235000  | 1.999379000  | 0.401407000  |
| C | -0.019119000 | 1.643292000  | 0.988754000  |
| H | 1.035023000  | 4.138368000  | 0.297424000  |
| H | 1.767662000  | 3.602149000  | 1.798606000  |
| H | 3.497862000  | 2.620966000  | -2.075291000 |
| H | 4.558575000  | 4.025544000  | -2.211132000 |
| H | 2.808335000  | 4.233150000  | -2.340264000 |
| H | 4.831643000  | 3.112484000  | 2.014902000  |
| H | 5.844644000  | 3.222441000  | 0.570232000  |
| H | 4.719185000  | 1.869733000  | 0.760085000  |
| H | 2.990779000  | 6.424088000  | -0.057112000 |
| H | 4.733192000  | 6.154534000  | 0.096802000  |
| H | 3.687849000  | 6.007050000  | 1.517387000  |
| H | -0.270575000 | 0.198411000  | 3.907561000  |
| H | -1.755123000 | -0.496931000 | 4.557267000  |
| H | -1.822937000 | 0.988077000  | 3.611573000  |
| H | 1.206943000  | -1.271305000 | 3.045528000  |
| H | 1.406512000  | -2.635642000 | 1.941724000  |
| H | 0.582642000  | -2.860480000 | 3.484581000  |
| H | 0.365389000  | -3.909562000 | 0.422605000  |
| H | -1.047296000 | -4.011381000 | -0.650516000 |
| H | -1.116661000 | -4.670374000 | 0.978246000  |
| H | -4.359730000 | 0.331908000  | 0.971842000  |
| H | -3.745056000 | 0.739694000  | 2.572693000  |
| H | -4.687603000 | -0.729136000 | 2.341106000  |
| H | 2.107417000  | 1.304533000  | 0.804312000  |
| H | 1.372727000  | 1.862885000  | -0.690310000 |
| H | -0.025226000 | 1.808779000  | 2.068172000  |
| C | -1.469319000 | 1.933890000  | -1.030503000 |
| C | -1.214799000 | 2.189717000  | 0.347570000  |
| C | -2.277599000 | 2.789072000  | 1.070846000  |
| C | -3.471604000 | 3.141752000  | 0.466832000  |
| C | -3.684334000 | 2.871421000  | -0.894564000 |
| C | -2.683947000 | 2.275749000  | -1.648157000 |
| H | -0.648147000 | 1.625623000  | -1.681144000 |
| H | -2.126673000 | 3.020248000  | 2.121962000  |
| H | -4.250787000 | 3.635093000  | 1.040151000  |
| H | -2.826887000 | 2.109233000  | -2.711566000 |
| C | 3.046636000  | -3.382994000 | -0.977636000 |
| C | 2.566087000  | -2.087000000 | -1.245956000 |
| C | 3.465074000  | -1.007140000 | -1.144496000 |

|    |              |              |              |
|----|--------------|--------------|--------------|
| C  | 4.784694000  | -1.211934000 | -0.777311000 |
| C  | 5.232100000  | -2.511419000 | -0.507701000 |
| C  | 4.367271000  | -3.602159000 | -0.610438000 |
| H  | 2.377504000  | -4.234672000 | -1.074339000 |
| H  | 3.137251000  | 0.004246000  | -1.364575000 |
| H  | 5.475708000  | -0.378639000 | -0.706000000 |
| H  | 4.730407000  | -4.604692000 | -0.410769000 |
| C  | 1.179511000  | -1.937764000 | -1.654219000 |
| C  | 0.503827000  | -0.803126000 | -1.987250000 |
| H  | 0.629356000  | -2.874049000 | -1.726629000 |
| H  | -0.467464000 | -0.897561000 | -2.477150000 |
| H  | 1.015258000  | 0.151705000  | -2.092853000 |
| Cl | 6.877828000  | -2.764784000 | -0.051982000 |
| Cl | -5.189615000 | 3.309500000  | -1.634423000 |
| Si | -3.768916000 | -2.604223000 | -0.613181000 |
| C  | -3.024449000 | -2.486423000 | -2.363880000 |
| H  | -2.066715000 | -3.008189000 | -2.472481000 |
| H  | -3.717201000 | -2.936675000 | -3.085131000 |
| H  | -2.890843000 | -1.440051000 | -2.669273000 |
| C  | -4.164291000 | -4.407995000 | -0.194700000 |
| H  | -4.565051000 | -4.491849000 | 0.821665000  |
| H  | -4.928347000 | -4.783609000 | -0.885625000 |
| H  | -3.295267000 | -5.068270000 | -0.270559000 |
| C  | -5.391843000 | -1.633198000 | -0.647075000 |
| H  | -5.914754000 | -1.648636000 | 0.313800000  |
| H  | -5.265029000 | -0.590371000 | -0.955975000 |
| H  | -6.048761000 | -2.112221000 | -1.383662000 |

***p*TS2<sup>a</sup><sub>iso</sub>,  $E_{(\text{SCF Done})} = -2792.52955$  a.u. IF = *i*180.37 cm<sup>-1</sup>**

|    |              |              |              |
|----|--------------|--------------|--------------|
| Sc | 0.321610000  | -0.608313000 | 0.198765000  |
| Si | -2.623679000 | 5.063190000  | -0.666991000 |
| C  | -2.165309000 | 3.193288000  | -0.658911000 |
| C  | -1.051654000 | 6.092537000  | -0.921169000 |
| C  | -3.446083000 | 5.513040000  | 0.980229000  |
| C  | -3.827955000 | 5.337797000  | -2.101150000 |
| C  | 0.656113000  | -1.889979000 | 3.453683000  |
| C  | 0.836696000  | -2.177639000 | 1.988803000  |
| C  | 2.051438000  | -1.984806000 | 1.256122000  |
| C  | 1.855338000  | -2.490268000 | -0.058591000 |
| C  | 0.500266000  | -2.974316000 | -0.170931000 |
| C  | -0.100223000 | -2.819141000 | 1.127444000  |
| C  | 3.342490000  | -1.485628000 | 1.837272000  |
| C  | 2.950692000  | -2.677593000 | -1.065262000 |
| C  | -1.421622000 | -3.371899000 | 1.574763000  |



|   |              |              |              |
|---|--------------|--------------|--------------|
| C | -1.205098000 | 2.778983000  | 0.457824000  |
| C | -0.801415000 | 1.296081000  | 0.515091000  |
| H | -1.750206000 | 2.959541000  | -1.648657000 |
| H | -3.106055000 | 2.632259000  | -0.575656000 |
| H | -0.340503000 | 5.972581000  | -0.095561000 |
| H | -1.301754000 | 7.158032000  | -0.981557000 |
| H | -0.540949000 | 5.822384000  | -1.852927000 |
| H | -4.333113000 | 4.896260000  | 1.165813000  |
| H | -3.770031000 | 6.560104000  | 0.967920000  |
| H | -2.764586000 | 5.393425000  | 1.830400000  |
| H | -3.374654000 | 5.071883000  | -3.063068000 |
| H | -4.127807000 | 6.390468000  | -2.156728000 |
| H | -4.738814000 | 4.740341000  | -1.979559000 |
| H | 1.229915000  | -1.015172000 | 3.778077000  |
| H | 1.006199000  | -2.737662000 | 4.057322000  |
| H | -0.391502000 | -1.720054000 | 3.720012000  |
| H | 3.183516000  | -0.756759000 | 2.638205000  |
| H | 3.983672000  | -1.017371000 | 1.086667000  |
| H | 3.904277000  | -2.321602000 | 2.275367000  |
| H | 3.752958000  | -1.948456000 | -0.933241000 |
| H | 2.596800000  | -2.610431000 | -2.098400000 |
| H | 3.398948000  | -3.672135000 | -0.943635000 |
| H | -2.224779000 | -3.199875000 | 0.856009000  |
| H | -1.731355000 | -2.951208000 | 2.533890000  |
| H | -1.338910000 | -4.457548000 | 1.713416000  |
| H | -1.665945000 | 3.026816000  | 1.425920000  |
| H | -0.286791000 | 3.381643000  | 0.413651000  |
| H | -0.166038000 | 1.193221000  | 1.436943000  |
| C | -2.658921000 | -0.098327000 | -0.515044000 |
| C | -1.964830000 | 0.346034000  | 0.630882000  |
| C | -2.477954000 | -0.031962000 | 1.890045000  |
| C | -3.648137000 | -0.772243000 | 2.007106000  |
| C | -4.319583000 | -1.180461000 | 0.851877000  |
| C | -3.821860000 | -0.857183000 | -0.412062000 |
| H | -2.314795000 | 0.195252000  | -1.503562000 |
| H | -1.975880000 | 0.308337000  | 2.793223000  |
| H | -4.046129000 | -1.030006000 | 2.983482000  |
| H | -4.355351000 | -1.174692000 | -1.302229000 |
| C | 4.118304000  | 0.572312000  | -1.385846000 |
| C | 2.881051000  | 0.952430000  | -0.835304000 |
| C | 2.902238000  | 1.810489000  | 0.280100000  |
| C | 4.098928000  | 2.256841000  | 0.834725000  |
| C | 5.307882000  | 1.851505000  | 0.272887000  |
| C | 5.319809000  | 1.014821000  | -0.845099000 |

|    |              |              |              |
|----|--------------|--------------|--------------|
| H  | 4.139459000  | -0.049665000 | -2.276802000 |
| H  | 1.970565000  | 2.161228000  | 0.721018000  |
| H  | 4.095919000  | 2.921154000  | 1.693119000  |
| H  | 6.264765000  | 0.725910000  | -1.294252000 |
| C  | 1.614780000  | 0.503005000  | -1.443764000 |
| C  | 0.477138000  | 1.312140000  | -1.405126000 |
| H  | 1.670735000  | -0.278170000 | -2.201876000 |
| H  | -0.341217000 | 1.091970000  | -2.087939000 |
| H  | 0.568354000  | 2.359885000  | -1.143526000 |
| Cl | 6.804914000  | 2.401239000  | 0.955572000  |
| Cl | -5.777350000 | -2.097878000 | 0.988441000  |
| Si | -0.184015000 | -3.870168000 | -1.726011000 |
| C  | -0.213959000 | -2.652694000 | -3.190801000 |
| H  | 0.776781000  | -2.272270000 | -3.461682000 |
| H  | -0.616423000 | -3.158772000 | -4.076714000 |
| H  | -0.870220000 | -1.794682000 | -2.992248000 |
| C  | 0.923897000  | -5.350875000 | -2.125269000 |
| H  | 0.998930000  | -6.024802000 | -1.264568000 |
| H  | 0.486851000  | -5.918593000 | -2.955314000 |
| H  | 1.937004000  | -5.061630000 | -2.418490000 |
| C  | -1.952997000 | -4.504222000 | -1.500823000 |
| H  | -2.040207000 | -5.233855000 | -0.690074000 |
| H  | -2.678872000 | -3.703513000 | -1.325565000 |
| H  | -2.244210000 | -5.011067000 | -2.429088000 |

**pP2<sup>a</sup>**<sub>iso</sub>,  $E_{(\text{SCF Done})} = -2792.571073$  a.u.

|    |              |              |              |
|----|--------------|--------------|--------------|
| Sc | 1.136439000  | -0.150007000 | 0.121454000  |
| Si | -6.161639000 | 0.809859000  | -0.761052000 |
| C  | -4.259391000 | 0.551090000  | -0.674736000 |
| C  | -6.573966000 | 2.121259000  | -2.065819000 |
| C  | -6.798633000 | 1.359683000  | 0.938625000  |
| C  | -6.936258000 | -0.851457000 | -1.240872000 |
| C  | 3.784067000  | -0.900707000 | 2.311284000  |
| C  | 3.166109000  | -1.219346000 | 0.979011000  |
| C  | 3.508946000  | -0.608603000 | -0.264131000 |
| C  | 2.753738000  | -1.248602000 | -1.290153000 |
| C  | 1.932046000  | -2.271677000 | -0.692343000 |
| C  | 2.228903000  | -2.258956000 | 0.717217000  |
| C  | 4.604034000  | 0.397348000  | -0.457934000 |
| C  | 2.945603000  | -0.990069000 | -2.756219000 |
| C  | 1.804819000  | -3.252178000 | 1.762226000  |
| C  | -3.450903000 | 1.809748000  | -0.357967000 |
| C  | -1.907244000 | 1.636175000  | -0.226002000 |
| H  | -3.951289000 | 0.122531000  | -1.638476000 |

|   |              |              |              |
|---|--------------|--------------|--------------|
| H | -4.082165000 | -0.226563000 | 0.083265000  |
| H | -6.160108000 | 3.102600000  | -1.807034000 |
| H | -7.660175000 | 2.238334000  | -2.155964000 |
| H | -6.189850000 | 1.841217000  | -3.053616000 |
| H | -6.549001000 | 0.628701000  | 1.716626000  |
| H | -7.889787000 | 1.462040000  | 0.920692000  |
| H | -6.385098000 | 2.329576000  | 1.238375000  |
| H | -6.577199000 | -1.190794000 | -2.219389000 |
| H | -8.027438000 | -0.767163000 | -1.300254000 |
| H | -6.704223000 | -1.631504000 | -0.506418000 |
| H | 4.130648000  | 0.136314000  | 2.366901000  |
| H | 4.660186000  | -1.538030000 | 2.491241000  |
| H | 3.094847000  | -1.071190000 | 3.145510000  |
| H | 4.636125000  | 1.145319000  | 0.340472000  |
| H | 4.511087000  | 0.928037000  | -1.407547000 |
| H | 5.577820000  | -0.110386000 | -0.461097000 |
| H | 3.121966000  | 0.069344000  | -2.965520000 |
| H | 2.087440000  | -1.308664000 | -3.351279000 |
| H | 3.822638000  | -1.537630000 | -3.125318000 |
| H | 0.902425000  | -3.798096000 | 1.487940000  |
| H | 1.642074000  | -2.789992000 | 2.741393000  |
| H | 2.598496000  | -3.999331000 | 1.898482000  |
| H | -3.814168000 | 2.258133000  | 0.576297000  |
| H | -3.615588000 | 2.564486000  | -1.138190000 |
| H | -1.519994000 | 2.638799000  | 0.006294000  |
| C | -1.304906000 | -0.623508000 | 0.834919000  |
| C | -1.569257000 | 0.755161000  | 0.957134000  |
| C | -1.547738000 | 1.296907000  | 2.255108000  |
| C | -1.272431000 | 0.520155000  | 3.376230000  |
| C | -1.013110000 | -0.845669000 | 3.226335000  |
| C | -1.036234000 | -1.424443000 | 1.957298000  |
| H | -1.390631000 | -1.105564000 | -0.140981000 |
| H | -1.760203000 | 2.355494000  | 2.389880000  |
| H | -1.266372000 | 0.964553000  | 4.366933000  |
| H | -0.885126000 | -2.491933000 | 1.845942000  |
| C | 2.150894000  | 2.599374000  | -2.021147000 |
| C | 1.185083000  | 2.029546000  | -1.152807000 |
| C | 1.302132000  | 2.391245000  | 0.218847000  |
| C | 2.284159000  | 3.281112000  | 0.684948000  |
| C | 3.187229000  | 3.825486000  | -0.213862000 |
| C | 3.111254000  | 3.490155000  | -1.575418000 |
| H | 2.097514000  | 2.365583000  | -3.081348000 |
| H | 0.516931000  | 2.117623000  | 0.930337000  |
| H | 2.317160000  | 3.564179000  | 1.732639000  |

|    |              |              |              |
|----|--------------|--------------|--------------|
| H  | 3.807965000  | 3.941509000  | -2.275607000 |
| C  | 0.260175000  | 0.971054000  | -1.592118000 |
| C  | -1.267548000 | 1.183888000  | -1.544289000 |
| H  | 0.525565000  | 0.638400000  | -2.599692000 |
| H  | -1.737454000 | 0.250276000  | -1.877859000 |
| H  | -1.550251000 | 1.931775000  | -2.301125000 |
| Cl | 4.402108000  | 4.933273000  | 0.332573000  |
| Cl | -0.693800000 | -1.821191000 | 4.619096000  |
| Si | 0.952040000  | -3.563159000 | -1.726091000 |
| C  | -0.371022000 | -2.730950000 | -2.808465000 |
| H  | 0.017965000  | -1.947515000 | -3.465666000 |
| H  | -0.833745000 | -3.493972000 | -3.446363000 |
| H  | -1.173676000 | -2.294377000 | -2.201760000 |
| C  | 2.201063000  | -4.488667000 | -2.805987000 |
| H  | 2.975478000  | -4.957215000 | -2.188359000 |
| H  | 1.692434000  | -5.283632000 | -3.364119000 |
| H  | 2.697575000  | -3.837789000 | -3.532173000 |
| C  | 0.035758000  | -4.843713000 | -0.669745000 |
| H  | 0.707742000  | -5.459428000 | -0.064066000 |
| H  | -0.728266000 | -4.410129000 | -0.014025000 |
| H  | -0.486561000 | -5.518025000 | -1.359892000 |

***o*C1st**,  $E_{(\text{SCF Done})} = -769.0727791$  a.u.

|    |              |              |              |
|----|--------------|--------------|--------------|
| C  | -2.357935000 | -0.717382000 | 0.000016000  |
| C  | -1.770739000 | 0.542866000  | -0.000086000 |
| C  | -0.381950000 | 0.660249000  | 0.000005000  |
| C  | 0.465892000  | -0.464118000 | 0.000193000  |
| C  | -0.167894000 | -1.720531000 | 0.000328000  |
| C  | -1.548824000 | -1.854101000 | 0.000226000  |
| H  | -2.379736000 | 1.441112000  | -0.000244000 |
| H  | -1.994977000 | -2.844837000 | 0.000346000  |
| C  | 1.928702000  | -0.329883000 | 0.000300000  |
| C  | 2.826584000  | -1.322832000 | -0.000467000 |
| H  | 2.300350000  | 0.691135000  | 0.001049000  |
| H  | 3.889749000  | -1.101498000 | -0.000261000 |
| H  | 2.558393000  | -2.376148000 | -0.001371000 |
| H  | -3.440669000 | -0.807687000 | -0.000049000 |
| H  | 0.448253000  | -2.614780000 | 0.000586000  |
| Cl | 0.273860000  | 2.285123000  | -0.000185000 |

***o*C1<sup>a</sup>**,  $E_{(\text{SCF Done})} = -2255.82822$  a.u.

|    |              |             |              |
|----|--------------|-------------|--------------|
| Sc | -0.613310000 | 0.016630000 | -0.225465000 |
| Si | -0.989007000 | 3.721161000 | -0.299867000 |
| C  | -1.549276000 | 1.954726000 | 0.109626000  |

|   |              |              |              |
|---|--------------|--------------|--------------|
| C | -0.716135000 | 3.933815000  | -2.169956000 |
| C | 0.610951000  | 4.168295000  | 0.640028000  |
| C | -2.315891000 | 4.967639000  | 0.238793000  |
| C | -0.899256000 | -0.986399000 | -3.675974000 |
| C | -1.332529000 | -1.244876000 | -2.259721000 |
| C | -2.484655000 | -0.689112000 | -1.634476000 |
| C | -2.634367000 | -1.284931000 | -0.334361000 |
| C | -1.569032000 | -2.248917000 | -0.203511000 |
| C | -0.772918000 | -2.219069000 | -1.376598000 |
| C | -3.417649000 | 0.263081000  | -2.325288000 |
| C | -1.399748000 | -3.259995000 | 0.896233000  |
| C | 0.344912000  | -3.169700000 | -1.697061000 |
| C | 1.407941000  | 0.894045000  | -1.596760000 |
| C | 2.419969000  | 0.000511000  | -1.486024000 |
| H | -2.565700000 | 1.890188000  | -0.308466000 |
| H | -1.702135000 | 1.944767000  | 1.207951000  |
| H | 0.106318000  | 3.325652000  | -2.564092000 |
| H | -0.488793000 | 4.980357000  | -2.404501000 |
| H | -1.624827000 | 3.667872000  | -2.723450000 |
| H | 0.430453000  | 4.179755000  | 1.722245000  |
| H | 0.947671000  | 5.173614000  | 0.360761000  |
| H | 1.444826000  | 3.481303000  | 0.448234000  |
| H | -3.261545000 | 4.787356000  | -0.285624000 |
| H | -2.005122000 | 5.996445000  | 0.020762000  |
| H | -2.513249000 | 4.898398000  | 1.315007000  |
| H | -1.081425000 | 0.047427000  | -3.988849000 |
| H | -1.460821000 | -1.626072000 | -4.369606000 |
| H | 0.161831000  | -1.203824000 | -3.838228000 |
| H | -2.883595000 | 0.956455000  | -2.983353000 |
| H | -4.004696000 | 0.856435000  | -1.624451000 |
| H | -4.125407000 | -0.292625000 | -2.955226000 |
| H | -2.019790000 | -4.143262000 | 0.695121000  |
| H | -1.697835000 | -2.878579000 | 1.876941000  |
| H | -0.367679000 | -3.617890000 | 0.968397000  |
| H | 1.027527000  | -3.327901000 | -0.854812000 |
| H | 0.942648000  | -2.834777000 | -2.549755000 |
| H | -0.059207000 | -4.154878000 | -1.965358000 |
| H | 1.432304000  | 1.873148000  | -1.125220000 |
| H | 0.637008000  | 0.735084000  | -2.353999000 |
| H | 2.331907000  | -0.935063000 | -2.034474000 |
| C | 1.411742000  | -1.321742000 | 1.970798000  |
| O | 0.462066000  | -0.258303000 | 1.648020000  |
| C | 0.429063000  | 0.720393000  | 2.748228000  |
| C | 1.353838000  | 0.154359000  | 3.818215000  |

|    |              |              |              |
|----|--------------|--------------|--------------|
| C  | 2.327480000  | -0.710486000 | 3.013475000  |
| H  | 0.846303000  | -2.169695000 | 2.367234000  |
| H  | 1.909097000  | -1.612071000 | 1.042946000  |
| H  | 0.782633000  | 1.670573000  | 2.341174000  |
| H  | -0.608010000 | 0.821129000  | 3.072193000  |
| H  | 1.851254000  | 0.949319000  | 4.380146000  |
| H  | 0.790920000  | -0.460824000 | 4.528518000  |
| H  | 3.099253000  | -0.096787000 | 2.536401000  |
| H  | 2.820290000  | -1.475087000 | 3.620083000  |
| C  | 4.071914000  | 1.448335000  | -0.287932000 |
| C  | 3.659837000  | 0.175411000  | -0.731799000 |
| C  | 4.528576000  | -0.906907000 | -0.472982000 |
| C  | 5.733894000  | -0.730574000 | 0.201656000  |
| C  | 6.102368000  | 0.540467000  | 0.633346000  |
| C  | 5.268905000  | 1.633778000  | 0.387781000  |
| H  | 3.453699000  | 2.311250000  | -0.515728000 |
| H  | 6.377372000  | -1.586087000 | 0.378484000  |
| H  | 5.564001000  | 2.629763000  | 0.703625000  |
| Si | -4.080383000 | -1.130656000 | 0.918394000  |
| C  | -4.918373000 | -2.825997000 | 1.044042000  |
| H  | -4.262434000 | -3.595728000 | 1.461762000  |
| H  | -5.799437000 | -2.753576000 | 1.692706000  |
| H  | -5.256722000 | -3.167275000 | 0.059299000  |
| C  | -5.399635000 | 0.132097000  | 0.421218000  |
| H  | -5.869504000 | -0.100356000 | -0.539465000 |
| H  | -6.186697000 | 0.101823000  | 1.185059000  |
| H  | -5.020469000 | 1.159011000  | 0.388677000  |
| C  | -3.438329000 | -0.597870000 | 2.629216000  |
| H  | -4.264731000 | -0.625848000 | 3.349642000  |
| H  | -2.643232000 | -1.240235000 | 3.022772000  |
| H  | -3.072188000 | 0.434996000  | 2.596438000  |
| Cl | 4.120740000  | -2.525999000 | -0.977517000 |
| H  | 7.048231000  | 0.676160000  | 1.149807000  |

***o*TS1<sup>a</sup>**,  $E_{(\text{SCF Done})} = -2255.819407$  a.u. **IF** =  $i188.37$  cm<sup>-1</sup>

|    |              |              |              |
|----|--------------|--------------|--------------|
| Sc | -0.050011000 | -0.195243000 | -0.138432000 |
| Si | -1.528204000 | 3.595900000  | -0.084539000 |
| C  | -0.844692000 | 1.820665000  | 0.120397000  |
| C  | -2.175282000 | 3.888619000  | -1.839632000 |
| C  | -0.140739000 | 4.829068000  | 0.312540000  |
| C  | -2.935211000 | 3.850148000  | 1.160761000  |
| C  | 0.174888000  | -1.643485000 | -3.446596000 |
| C  | -0.494439000 | -1.666648000 | -2.102883000 |
| C  | -1.699476000 | -0.995168000 | -1.756414000 |

|   |              |              |              |
|---|--------------|--------------|--------------|
| C | -2.111964000 | -1.431746000 | -0.446896000 |
| C | -1.131578000 | -2.393995000 | -0.013167000 |
| C | -0.137550000 | -2.527096000 | -1.019956000 |
| C | -2.448665000 | -0.093060000 | -2.696417000 |
| C | -1.198898000 | -3.236773000 | 1.229999000  |
| C | 0.999037000  | -3.509694000 | -1.029514000 |
| C | 0.806300000  | 1.750422000  | -1.606613000 |
| C | 1.735027000  | 0.728792000  | -1.502728000 |
| H | -1.729648000 | 1.149216000  | 0.250896000  |
| H | -0.279770000 | 1.825668000  | 1.075917000  |
| H | -1.393296000 | 3.781609000  | -2.599157000 |
| H | -2.566522000 | 4.910015000  | -1.916157000 |
| H | -2.993582000 | 3.206288000  | -2.094084000 |
| H | 0.287036000  | 4.647925000  | 1.305981000  |
| H | -0.551373000 | 5.845680000  | 0.318215000  |
| H | 0.674977000  | 4.820079000  | -0.419287000 |
| H | -3.769122000 | 3.162355000  | 0.980363000  |
| H | -3.328233000 | 4.871179000  | 1.086499000  |
| H | -2.591789000 | 3.702309000  | 2.191244000  |
| H | 0.158723000  | -0.653910000 | -3.916180000 |
| H | -0.341136000 | -2.325299000 | -4.135545000 |
| H | 1.216702000  | -1.973781000 | -3.393678000 |
| H | -1.786026000 | 0.348502000  | -3.447719000 |
| H | -2.956952000 | 0.723352000  | -2.181282000 |
| H | -3.212896000 | -0.657309000 | -3.247161000 |
| H | -1.688732000 | -4.195377000 | 1.015290000  |
| H | -1.769517000 | -2.756939000 | 2.029079000  |
| H | -0.207550000 | -3.477308000 | 1.628056000  |
| H | 1.212248000  | -3.902117000 | -0.030638000 |
| H | 1.925506000  | -3.081693000 | -1.426472000 |
| H | 0.750189000  | -4.373693000 | -1.659934000 |
| H | 1.007960000  | 2.736580000  | -1.206233000 |
| H | 0.058209000  | 1.717503000  | -2.392196000 |
| H | 1.714236000  | -0.056746000 | -2.252153000 |
| C | 2.072435000  | -1.341498000 | 2.078105000  |
| O | 0.862201000  | -0.551723000 | 1.822225000  |
| C | 0.274796000  | -0.120170000 | 3.091660000  |
| C | 0.940857000  | -0.987487000 | 4.145213000  |
| C | 2.344250000  | -1.178525000 | 3.565184000  |
| H | 1.848500000  | -2.377035000 | 1.806425000  |
| H | 2.864944000  | -0.951198000 | 1.437835000  |
| H | 0.511385000  | 0.941458000  | 3.224117000  |
| H | -0.807238000 | -0.248292000 | 3.020023000  |
| H | 0.943849000  | -0.504000000 | 5.125845000  |

|    |              |              |              |
|----|--------------|--------------|--------------|
| H  | 0.422653000  | -1.948194000 | 4.238228000  |
| H  | 2.962239000  | -0.292439000 | 3.745119000  |
| H  | 2.863814000  | -2.046884000 | 3.978984000  |
| C  | 3.038191000  | 1.740698000  | 0.397782000  |
| C  | 2.935914000  | 0.809407000  | -0.656737000 |
| C  | 4.056045000  | -0.024031000 | -0.866140000 |
| C  | 5.203308000  | 0.068652000  | -0.081009000 |
| C  | 5.266747000  | 1.002202000  | 0.950370000  |
| C  | 4.178515000  | 1.842880000  | 1.186056000  |
| H  | 2.201584000  | 2.406387000  | 0.593406000  |
| H  | 6.045419000  | -0.582287000 | -0.293270000 |
| H  | 4.221823000  | 2.586161000  | 1.977246000  |
| Si | -3.812210000 | -1.186842000 | 0.407643000  |
| C  | -4.689232000 | -2.865339000 | 0.409691000  |
| H  | -4.161529000 | -3.612883000 | 1.010478000  |
| H  | -5.699027000 | -2.758594000 | 0.823100000  |
| H  | -4.783997000 | -3.256833000 | -0.609245000 |
| C  | -4.919445000 | 0.059869000  | -0.491960000 |
| H  | -5.146750000 | -0.241438000 | -1.518873000 |
| H  | -5.870673000 | 0.111232000  | 0.052066000  |
| H  | -4.503815000 | 1.073137000  | -0.512944000 |
| C  | -3.641076000 | -0.559078000 | 2.196351000  |
| H  | -4.644631000 | -0.452053000 | 2.626419000  |
| H  | -3.088453000 | -1.241592000 | 2.850700000  |
| H  | -3.168270000 | 0.429451000  | 2.240374000  |
| H  | 6.166189000  | 1.077480000  | 1.554238000  |
| Cl | 4.067787000  | -1.189669000 | -2.167811000 |

**pP1<sup>a</sup>**,  $E_{(\text{SCF Done})} = -2255.855935$  a.u.

|    |              |              |              |
|----|--------------|--------------|--------------|
| Sc | 0.070551000  | -0.415825000 | -0.149343000 |
| Si | -1.199536000 | 3.816780000  | -0.087650000 |
| C  | -0.450077000 | 2.023157000  | -0.218462000 |
| C  | -1.976909000 | 4.264164000  | -1.749033000 |
| C  | 0.209621000  | 4.997419000  | 0.351792000  |
| C  | -2.493031000 | 3.800253000  | 1.291240000  |
| C  | 0.145841000  | -1.958253000 | -3.381432000 |
| C  | -0.539668000 | -1.864526000 | -2.051877000 |
| C  | -1.672143000 | -1.064112000 | -1.743171000 |
| C  | -2.138401000 | -1.399740000 | -0.419612000 |
| C  | -1.265940000 | -2.437055000 | 0.062643000  |
| C  | -0.277890000 | -2.704058000 | -0.924462000 |
| C  | -2.305928000 | -0.118112000 | -2.725190000 |
| C  | -1.411606000 | -3.210324000 | 1.343777000  |
| C  | 0.781698000  | -3.767211000 | -0.862908000 |



|   |              |              |              |
|---|--------------|--------------|--------------|
| C | 0.545062000  | 1.878787000  | -1.422985000 |
| C | 1.459680000  | 0.638455000  | -1.460160000 |
| H | -1.349935000 | 1.374801000  | -0.291480000 |
| H | 0.028671000  | 1.865827000  | 0.766715000  |
| H | -1.239755000 | 4.265456000  | -2.559143000 |
| H | -2.406418000 | 5.271308000  | -1.694777000 |
| H | -2.785549000 | 3.576984000  | -2.022191000 |
| H | 0.673159000  | 4.738013000  | 1.310694000  |
| H | -0.185463000 | 6.015800000  | 0.445805000  |
| H | 0.992274000  | 5.022092000  | -0.413959000 |
| H | -3.326147000 | 3.125205000  | 1.066834000  |
| H | -2.912742000 | 4.804952000  | 1.419118000  |
| H | -2.061019000 | 3.504210000  | 2.254397000  |
| H | 0.164145000  | -1.002627000 | -3.914058000 |
| H | -0.380727000 | -2.674567000 | -4.026433000 |
| H | 1.178320000  | -2.301838000 | -3.285042000 |
| H | -1.581451000 | 0.235413000  | -3.465277000 |
| H | -2.753120000 | 0.757803000  | -2.249816000 |
| H | -3.105411000 | -0.621465000 | -3.284708000 |
| H | -1.922884000 | -4.163933000 | 1.158781000  |
| H | -2.000852000 | -2.671056000 | 2.089787000  |
| H | -0.445126000 | -3.458078000 | 1.796660000  |
| H | 0.970151000  | -4.102596000 | 0.161878000  |
| H | 1.732810000  | -3.432752000 | -1.290960000 |
| H | 0.467839000  | -4.652052000 | -1.432386000 |
| H | 1.159319000  | 2.790425000  | -1.441488000 |
| H | -0.058237000 | 1.898758000  | -2.335449000 |
| H | 1.596618000  | 0.260078000  | -2.471839000 |
| C | 2.194562000  | -1.295468000 | 2.172289000  |
| O | 0.898579000  | -0.674154000 | 1.853295000  |
| C | 0.190919000  | -0.339861000 | 3.088205000  |
| C | 0.924871000  | -1.098971000 | 4.179978000  |
| C | 2.367136000  | -1.087337000 | 3.667611000  |
| H | 2.120025000  | -2.354639000 | 1.906250000  |
| H | 2.953542000  | -0.806885000 | 1.560060000  |
| H | 0.259754000  | 0.744807000  | 3.228602000  |
| H | -0.853962000 | -0.629212000 | 2.960376000  |
| H | 0.811441000  | -0.618243000 | 5.155378000  |
| H | 0.546294000  | -2.124123000 | 4.257633000  |
| H | 2.843103000  | -0.120950000 | 3.865801000  |
| H | 2.985329000  | -1.869966000 | 4.115449000  |
| C | 2.954903000  | 1.719864000  | 0.284310000  |
| C | 2.734128000  | 0.748471000  | -0.720414000 |
| C | 3.820171000  | -0.133223000 | -0.945491000 |

|    |              |              |              |
|----|--------------|--------------|--------------|
| C  | 5.017639000  | -0.055223000 | -0.241042000 |
| C  | 5.184758000  | 0.913441000  | 0.747776000  |
| C  | 4.144765000  | 1.804341000  | 1.003402000  |
| H  | 2.183556000  | 2.458286000  | 0.484362000  |
| H  | 5.818027000  | -0.748914000 | -0.479354000 |
| H  | 4.264326000  | 2.584747000  | 1.750486000  |
| Si | -3.819145000 | -0.962205000 | 0.390505000  |
| C  | -4.852592000 | -2.547741000 | 0.443079000  |
| H  | -4.394734000 | -3.326764000 | 1.060942000  |
| H  | -5.845331000 | -2.334743000 | 0.856817000  |
| H  | -4.989584000 | -2.955075000 | -0.564734000 |
| C  | -4.793994000 | 0.343898000  | -0.575588000 |
| H  | -5.020344000 | 0.032500000  | -1.599609000 |
| H  | -5.751384000 | 0.488633000  | -0.059812000 |
| H  | -4.298109000 | 1.320125000  | -0.612830000 |
| C  | -3.618827000 | -0.279157000 | 2.157121000  |
| H  | -4.606269000 | 0.021231000  | 2.528652000  |
| H  | -3.226499000 | -1.015246000 | 2.867288000  |
| H  | -2.981189000 | 0.612717000  | 2.187976000  |
| H  | 6.122005000  | 0.976986000  | 1.292340000  |
| Cl | 3.701786000  | -1.366541000 | -2.181896000 |

***oC2***<sub>syn</sub>,  $E_{(\text{SCF Done})} = -3024.932504$  a.u.

|    |              |              |              |
|----|--------------|--------------|--------------|
| Sc | 1.103764000  | -0.931544000 | 0.211790000  |
| Si | 1.829283000  | 5.284991000  | -0.853842000 |
| C  | 2.189826000  | 3.683563000  | 0.132553000  |
| C  | 0.037492000  | 5.838527000  | -0.546067000 |
| C  | 2.080455000  | 4.968001000  | -2.708717000 |
| C  | 3.024330000  | 6.629712000  | -0.260028000 |
| C  | 2.773005000  | -2.037077000 | -1.130410000 |
| C  | 2.313440000  | -0.916337000 | -1.909829000 |
| C  | 0.940309000  | -1.110581000 | -2.218281000 |
| C  | 0.538329000  | -2.376621000 | -1.683754000 |
| C  | 1.657876000  | -2.944752000 | -1.020673000 |
| C  | 3.159280000  | 0.203909000  | -2.445225000 |
| C  | 0.072335000  | -0.214608000 | -3.055264000 |
| C  | -0.806487000 | -3.007906000 | -1.903686000 |
| C  | 1.671877000  | -4.297377000 | -0.361624000 |
| C  | 1.351462000  | 2.448538000  | -0.246041000 |
| C  | 1.640207000  | 1.196374000  | 0.580074000  |
| H  | 2.075161000  | 3.911694000  | 1.201711000  |
| H  | 3.255255000  | 3.443804000  | -0.001012000 |
| H  | -0.687369000 | 5.085344000  | -0.877284000 |
| H  | -0.177354000 | 6.762345000  | -1.095572000 |

|   |              |              |              |
|---|--------------|--------------|--------------|
| H | -0.142058000 | 6.039472000  | 0.516890000  |
| H | 3.096203000  | 4.613020000  | -2.919073000 |
| H | 1.928427000  | 5.890603000  | -3.280754000 |
| H | 1.374075000  | 4.223823000  | -3.095241000 |
| H | 2.900941000  | 6.828318000  | 0.810860000  |
| H | 2.851691000  | 7.570807000  | -0.794774000 |
| H | 4.067378000  | 6.338232000  | -0.428693000 |
| H | 3.731416000  | 0.721145000  | -1.669951000 |
| H | 2.553756000  | 0.949135000  | -2.967161000 |
| H | 3.880583000  | -0.183751000 | -3.175921000 |
| H | 0.316203000  | 0.843939000  | -2.923528000 |
| H | -0.990036000 | -0.343307000 | -2.823162000 |
| H | 0.193992000  | -0.445503000 | -4.121998000 |
| H | -0.891890000 | -3.370281000 | -2.936330000 |
| H | -1.634855000 | -2.308926000 | -1.744592000 |
| H | -0.970989000 | -3.870703000 | -1.252393000 |
| H | 0.661900000  | -4.698194000 | -0.236383000 |
| H | 2.152280000  | -4.285637000 | 0.621581000  |
| H | 2.224006000  | -5.020812000 | -0.974803000 |
| H | 1.536862000  | 2.213708000  | -1.300028000 |
| H | 0.278947000  | 2.687246000  | -0.195010000 |
| H | 2.718362000  | 0.955193000  | 0.525900000  |
| C | -1.134352000 | -2.582540000 | 1.864454000  |
| O | -0.818876000 | -1.376074000 | 1.100812000  |
| C | -1.950998000 | -0.436016000 | 1.156536000  |
| C | -3.067601000 | -1.209512000 | 1.840861000  |
| C | -2.303794000 | -2.180128000 | 2.745095000  |
| H | -1.401907000 | -3.369244000 | 1.152617000  |
| H | -0.235748000 | -2.872500000 | 2.415770000  |
| H | -1.618015000 | 0.428908000  | 1.736753000  |
| H | -2.189473000 | -0.134257000 | 0.133983000  |
| H | -3.733739000 | -0.543798000 | 2.395646000  |
| H | -3.666989000 | -1.753089000 | 1.103796000  |
| H | -1.945780000 | -1.673381000 | 3.647873000  |
| H | -2.901234000 | -3.044820000 | 3.046483000  |
| C | 0.319491000  | 2.156035000  | 2.543542000  |
| C | 1.213192000  | 1.198163000  | 1.995874000  |
| C | 1.580978000  | 0.190978000  | 2.916345000  |
| C | 1.179677000  | 0.124605000  | 4.246090000  |
| C | 0.329458000  | 1.111341000  | 4.732631000  |
| C | -0.101080000 | 2.120584000  | 3.865989000  |
| H | -0.013092000 | 2.969792000  | 1.907475000  |
| H | 1.536147000  | -0.676978000 | 4.885669000  |
| H | -0.761245000 | 2.901831000  | 4.233241000  |

|    |              |              |              |
|----|--------------|--------------|--------------|
| C  | -6.019578000 | -0.879547000 | -0.965494000 |
| C  | -5.768921000 | 0.502947000  | -1.008394000 |
| C  | -6.669581000 | 1.327794000  | -0.311534000 |
| C  | -7.744597000 | 0.805670000  | 0.397179000  |
| C  | -7.961341000 | -0.571994000 | 0.418941000  |
| C  | -7.095851000 | -1.419879000 | -0.266819000 |
| H  | -6.531955000 | 2.404077000  | -0.364462000 |
| H  | -8.426119000 | 1.474608000  | 0.914766000  |
| H  | -7.252045000 | -2.493892000 | -0.267992000 |
| C  | -4.646382000 | 1.070779000  | -1.770064000 |
| C  | -4.018710000 | 2.220040000  | -1.487396000 |
| H  | -4.326056000 | 0.500205000  | -2.639745000 |
| H  | -3.232621000 | 2.600191000  | -2.133719000 |
| H  | -4.275536000 | 2.828979000  | -0.623434000 |
| Si | 4.615344000  | -2.426485000 | -0.761988000 |
| C  | 5.352153000  | -3.127927000 | -2.360406000 |
| H  | 6.409593000  | -3.377217000 | -2.212827000 |
| H  | 4.832133000  | -4.040466000 | -2.672313000 |
| H  | 5.291212000  | -2.409299000 | -3.184750000 |
| C  | 4.831007000  | -3.719834000 | 0.612084000  |
| H  | 4.345940000  | -3.449074000 | 1.556918000  |
| H  | 4.475889000  | -4.711364000 | 0.316063000  |
| H  | 5.904596000  | -3.809070000 | 0.818797000  |
| C  | 5.588643000  | -0.880945000 | -0.246501000 |
| H  | 6.575723000  | -1.198908000 | 0.110854000  |
| H  | 5.753935000  | -0.193070000 | -1.080902000 |
| H  | 5.111309000  | -0.326147000 | 0.568839000  |
| H  | 0.015982000  | 1.094497000  | 5.771755000  |
| H  | -8.807974000 | -0.989294000 | 0.956533000  |
| Cl | 2.625727000  | -1.145383000 | 2.327645000  |
| Cl | -4.944664000 | -1.998139000 | -1.788920000 |

***o*TS2<sup>a</sup><sub>syn</sub>,  $E_{(\text{SCF Done})} = -3024.911323$  a.u.  $\text{IF} = i$  185.05 cm<sup>-1</sup>**

|    |              |              |              |
|----|--------------|--------------|--------------|
| Sc | 0.864906000  | 0.607629000  | 0.228578000  |
| Si | -5.064915000 | -1.731096000 | -1.029132000 |
| C  | -3.283950000 | -1.627709000 | -0.314666000 |
| C  | -5.089337000 | -1.019381000 | -2.787548000 |
| C  | -6.248470000 | -0.754626000 | 0.083923000  |
| C  | -5.556756000 | -3.560233000 | -1.058016000 |
| C  | 0.287817000  | 2.893544000  | -0.478650000 |
| C  | 1.449748000  | 2.536577000  | -1.248602000 |
| C  | 2.556514000  | 2.380919000  | -0.369006000 |
| C  | 2.106571000  | 2.659079000  | 0.955357000  |
| C  | 0.722516000  | 2.969883000  | 0.895160000  |

|   |               |               |               |
|---|---------------|---------------|---------------|
| C | 1. 553779000  | 2. 518920000  | -2. 748037000 |
| C | 3. 995520000  | 2. 194758000  | -0. 751744000 |
| C | 3. 004735000  | 2. 798108000  | 2. 148495000  |
| C | -0. 077433000 | 3. 470421000  | 2. 065403000  |
| C | -2. 730270000 | -0. 205952000 | -0. 185790000 |
| C | -1. 295038000 | -0. 061553000 | 0. 364310000  |
| H | -2. 643869000 | -2. 261189000 | -0. 946492000 |
| H | -3. 300266000 | -2. 113400000 | 0. 670301000  |
| H | -4. 809567000 | 0. 040566000  | -2. 806042000 |
| H | -6. 095543000 | -1. 098846000 | -3. 214951000 |
| H | -4. 406633000 | -1. 562418000 | -3. 451734000 |
| H | -6. 223316000 | -1. 123194000 | 1. 115967000  |
| H | -7. 278709000 | -0. 853874000 | -0. 277094000 |
| H | -6. 009456000 | 0. 314907000  | 0. 100865000  |
| H | -4. 884083000 | -4. 148333000 | -1. 693036000 |
| H | -6. 572784000 | -3. 681873000 | -1. 450511000 |
| H | -5. 535786000 | -3. 993623000 | -0. 051428000 |
| H | 0. 721692000  | 2. 000346000  | -3. 232472000 |
| H | 2. 481125000  | 2. 048167000  | -3. 087292000 |
| H | 1. 560666000  | 3. 545118000  | -3. 138046000 |
| H | 4. 112781000  | 1. 687276000  | -1. 710719000 |
| H | 4. 557477000  | 1. 625998000  | -0. 003132000 |
| H | 4. 489113000  | 3. 172503000  | -0. 837754000 |
| H | 3. 518005000  | 3. 768795000  | 2. 119758000  |
| H | 3. 786072000  | 2. 030908000  | 2. 176135000  |
| H | 2. 454237000  | 2. 763578000  | 3. 093228000  |
| H | 0. 282076000  | 3. 067705000  | 3. 017810000  |
| H | -1. 135853000 | 3. 221871000  | 1. 985609000  |
| H | -0. 001535000 | 4. 564170000  | 2. 135201000  |
| H | -3. 399186000 | 0. 357299000  | 0. 478979000  |
| H | -2. 777493000 | 0. 311875000  | -1. 153150000 |
| H | -1. 211291000 | 1. 010710000  | 0. 675071000  |
| C | 2. 224977000  | -0. 537637000 | 2. 994401000  |
| O | 2. 277789000  | -0. 461655000 | 1. 532388000  |
| C | 3. 409011000  | -1. 247931000 | 1. 036086000  |
| C | 4. 303780000  | -1. 439108000 | 2. 246796000  |
| C | 3. 284673000  | -1. 558730000 | 3. 382260000  |
| H | 2. 450262000  | 0. 459603000  | 3. 379882000  |
| H | 1. 212820000  | -0. 826748000 | 3. 279488000  |
| H | 3. 016312000  | -2. 196105000 | 0. 657395000  |
| H | 3. 866056000  | -0. 691583000 | 0. 216111000  |
| H | 4. 938630000  | -2. 323575000 | 2. 145956000  |
| H | 4. 952339000  | -0. 568007000 | 2. 393390000  |
| H | 2. 853830000  | -2. 565312000 | 3. 407233000  |

|    |              |              |              |
|----|--------------|--------------|--------------|
| H  | 3.710974000  | -1.345188000 | 4.366190000  |
| C  | -0.408487000 | -2.212479000 | 1.387743000  |
| C  | -1.023226000 | -0.956926000 | 1.549379000  |
| C  | -1.485053000 | -0.658462000 | 2.853761000  |
| C  | -1.347219000 | -1.553963000 | 3.914051000  |
| C  | -0.736787000 | -2.788759000 | 3.704724000  |
| C  | -0.263295000 | -3.117544000 | 2.436271000  |
| H  | -0.044105000 | -2.487796000 | 0.404284000  |
| H  | -1.736490000 | -1.285640000 | 4.891158000  |
| H  | 0.203201000  | -4.081710000 | 2.255041000  |
| C  | 2.958460000  | -2.295780000 | -2.298522000 |
| C  | 1.613173000  | -2.072859000 | -1.934242000 |
| C  | 0.836824000  | -3.238454000 | -1.760315000 |
| C  | 1.363115000  | -4.518169000 | -1.890887000 |
| C  | 2.706100000  | -4.691995000 | -2.219769000 |
| C  | 3.500979000  | -3.570775000 | -2.436557000 |
| H  | -0.225340000 | -3.141743000 | -1.556014000 |
| H  | 0.715761000  | -5.379934000 | -1.754591000 |
| H  | 4.541299000  | -3.675314000 | -2.727846000 |
| C  | 1.036623000  | -0.719297000 | -1.841695000 |
| C  | -0.328672000 | -0.470586000 | -1.675118000 |
| H  | 1.630995000  | 0.069106000  | -2.295945000 |
| H  | -0.718791000 | 0.488963000  | -2.005013000 |
| H  | -1.056209000 | -1.270674000 | -1.716894000 |
| Si | -1.263277000 | 3.774621000  | -1.186150000 |
| C  | -0.750563000 | 5.583414000  | -1.430221000 |
| H  | -1.588822000 | 6.169369000  | -1.825317000 |
| H  | -0.440473000 | 6.038171000  | -0.482779000 |
| H  | 0.083348000  | 5.674872000  | -2.134882000 |
| C  | -2.762864000 | 3.727582000  | -0.021562000 |
| H  | -2.996919000 | 2.726874000  | 0.356548000  |
| H  | -2.645780000 | 4.399769000  | 0.833987000  |
| H  | -3.637499000 | 4.074215000  | -0.585764000 |
| C  | -1.837994000 | 3.086936000  | -2.861132000 |
| H  | -2.752591000 | 3.625362000  | -3.139705000 |
| H  | -1.112634000 | 3.252089000  | -3.662777000 |
| H  | -2.092568000 | 2.021487000  | -2.840817000 |
| Cl | -2.330803000 | 0.830839000  | 3.183981000  |
| Cl | 4.023874000  | -0.948759000 | -2.645955000 |
| H  | -0.644112000 | -3.488761000 | 4.530286000  |
| H  | 3.128763000  | -5.685893000 | -2.331663000 |

***oP2***<sup>a</sup><sub>syn</sub>,  $E_{(\text{SCF Done})} = -3024.956343$  a.u.

|    |              |              |              |
|----|--------------|--------------|--------------|
| Sc | -1.252554000 | -0.087440000 | -0.306219000 |
|----|--------------|--------------|--------------|

|    |              |              |              |
|----|--------------|--------------|--------------|
| Si | 6.388255000  | -0.816019000 | -0.661240000 |
| C  | 4.833385000  | 0.103252000  | -0.009093000 |
| C  | 6.051208000  | -1.471248000 | -2.410272000 |
| C  | 6.815178000  | -2.252188000 | 0.500867000  |
| C  | 7.814167000  | 0.431010000  | -0.706692000 |
| C  | -2.079738000 | -2.379157000 | -0.654857000 |
| C  | -0.865284000 | -2.236528000 | -1.424123000 |
| C  | -1.078699000 | -1.281700000 | -2.452995000 |
| C  | -2.421871000 | -0.803090000 | -2.332570000 |
| C  | -3.037191000 | -1.489740000 | -1.249730000 |
| C  | 0.397592000  | -3.038784000 | -1.279329000 |
| C  | -0.142945000 | -0.953898000 | -3.577826000 |
| C  | -3.105651000 | 0.119505000  | -3.300487000 |
| C  | -4.494169000 | -1.371423000 | -0.902480000 |
| C  | 3.574907000  | -0.766880000 | 0.081906000  |
| C  | 2.191646000  | -0.092148000 | 0.320601000  |
| H  | 4.669004000  | 0.963831000  | -0.672882000 |
| H  | 5.105213000  | 0.510211000  | 0.972956000  |
| H  | 5.249661000  | -2.218958000 | -2.425185000 |
| H  | 6.949795000  | -1.949431000 | -2.817082000 |
| H  | 5.772015000  | -0.659977000 | -3.092907000 |
| H  | 7.000785000  | -1.895883000 | 1.520811000  |
| H  | 7.721632000  | -2.765566000 | 0.159933000  |
| H  | 6.012192000  | -2.996983000 | 0.544175000  |
| H  | 7.585976000  | 1.273583000  | -1.369689000 |
| H  | 8.732784000  | -0.040765000 | -1.073933000 |
| H  | 8.025035000  | 0.834922000  | 0.290306000  |
| H  | 0.649162000  | -3.249515000 | -0.237390000 |
| H  | 1.250908000  | -2.528921000 | -1.736222000 |
| H  | 0.298012000  | -4.005570000 | -1.790262000 |
| H  | 0.907619000  | -1.007663000 | -3.278054000 |
| H  | -0.322745000 | 0.045769000  | -3.984093000 |
| H  | -0.280082000 | -1.667024000 | -4.401866000 |
| H  | -3.387994000 | -0.429902000 | -4.208662000 |
| H  | -2.467921000 | 0.951508000  | -3.613782000 |
| H  | -4.028509000 | 0.540268000  | -2.889078000 |
| H  | -4.864420000 | -0.345104000 | -0.997474000 |
| H  | -4.707808000 | -1.711306000 | 0.113084000  |
| H  | -5.098939000 | -1.985232000 | -1.582797000 |
| H  | 3.715977000  | -1.533403000 | 0.855371000  |
| H  | 3.459754000  | -1.316098000 | -0.863565000 |
| H  | 1.481183000  | -0.911781000 | 0.154086000  |
| C  | -3.354040000 | 0.750030000  | 2.058031000  |
| O  | -2.768920000 | 1.063510000  | 0.752322000  |

|    |              |              |              |
|----|--------------|--------------|--------------|
| C  | -3.442429000 | 2.234356000  | 0.176387000  |
| C  | -4.737943000 | 2.351815000  | 0.957270000  |
| C  | -4.311882000 | 1.895559000  | 2.354613000  |
| H  | -3.865171000 | -0.211871000 | 1.965716000  |
| H  | -2.537900000 | 0.664004000  | 2.778347000  |
| H  | -2.785316000 | 3.094813000  | 0.320756000  |
| H  | -3.573461000 | 2.044984000  | -0.891658000 |
| H  | -5.125848000 | 3.373892000  | 0.942738000  |
| H  | -5.506326000 | 1.687087000  | 0.547254000  |
| H  | -3.792626000 | 2.704253000  | 2.879850000  |
| H  | -5.151424000 | 1.569364000  | 2.974336000  |
| C  | 2.834334000  | 1.356225000  | 2.319730000  |
| C  | 1.985255000  | 0.396123000  | 1.738656000  |
| C  | 0.938529000  | -0.026650000 | 2.563118000  |
| C  | 0.740516000  | 0.393874000  | 3.875430000  |
| C  | 1.630407000  | 1.316619000  | 4.415471000  |
| C  | 2.671900000  | 1.803863000  | 3.626483000  |
| H  | 3.635913000  | 1.766114000  | 1.716170000  |
| H  | -0.083002000 | -0.000026000 | 4.462650000  |
| H  | 3.362039000  | 2.539101000  | 4.030127000  |
| C  | -0.682626000 | 3.587475000  | -1.517334000 |
| C  | -0.094736000 | 2.657988000  | -0.626997000 |
| C  | 0.029942000  | 3.113964000  | 0.705713000  |
| C  | -0.383083000 | 4.376602000  | 1.118419000  |
| C  | -0.960421000 | 5.257523000  | 0.203714000  |
| C  | -1.106523000 | 4.855808000  | -1.120993000 |
| H  | 0.492163000  | 2.452502000  | 1.431931000  |
| H  | -0.242762000 | 4.675622000  | 2.153929000  |
| H  | -1.529652000 | 5.528607000  | -1.860499000 |
| C  | 0.374851000  | 1.300419000  | -1.038050000 |
| C  | 1.868525000  | 0.989008000  | -0.738684000 |
| H  | 0.253621000  | 1.234736000  | -2.123204000 |
| H  | 2.324348000  | 0.640949000  | -1.674786000 |
| H  | 2.398226000  | 1.916138000  | -0.481882000 |
| Si | -2.558042000 | -3.817874000 | 0.524137000  |
| C  | -3.746304000 | -4.932196000 | -0.443726000 |
| H  | -4.019627000 | -5.804205000 | 0.162114000  |
| H  | -4.671393000 | -4.415038000 | -0.719022000 |
| H  | -3.277572000 | -5.296895000 | -1.364431000 |
| C  | -3.419239000 | -3.237189000 | 2.119831000  |
| H  | -2.786772000 | -2.576862000 | 2.723548000  |
| H  | -4.378380000 | -2.738335000 | 1.946625000  |
| H  | -3.630781000 | -4.123989000 | 2.730180000  |
| C  | -1.075522000 | -4.864260000 | 1.068770000  |



|    |              |              |              |
|----|--------------|--------------|--------------|
| H  | -1.458672000 | -5.668207000 | 1.709564000  |
| H  | -0.561468000 | -5.338555000 | 0.227794000  |
| H  | -0.339139000 | -4.305838000 | 1.656359000  |
| Cl | -0.273081000 | -1.186857000 | 1.932088000  |
| Cl | -0.858789000 | 3.211723000  | -3.223231000 |
| H  | 1.503279000  | 1.652616000  | 5.440207000  |
| H  | -1.279067000 | 6.250340000  | 0.507750000  |

***oC2***<sub>iso</sub>,  $E_{(\text{SCF Done})} = -3024.93383$  a.u.

|    |              |              |              |
|----|--------------|--------------|--------------|
| Sc | -0.955257000 | 0.959456000  | -0.195881000 |
| Si | -3.807395000 | -3.807984000 | -1.285342000 |
| C  | -2.948179000 | -2.206894000 | -0.663151000 |
| C  | -4.173317000 | -3.667522000 | -3.140120000 |
| C  | -5.419687000 | -4.065107000 | -0.320086000 |
| C  | -2.630578000 | -5.261112000 | -0.965579000 |
| C  | -1.759070000 | 3.180373000  | -2.768498000 |
| C  | -0.730835000 | 2.195612000  | -2.285477000 |
| C  | -0.727530000 | 0.819766000  | -2.642364000 |
| C  | 0.432174000  | 0.219707000  | -2.057700000 |
| C  | 1.155207000  | 1.233956000  | -1.372244000 |
| C  | 0.435117000  | 2.472951000  | -1.481928000 |
| C  | -1.656526000 | 0.151884000  | -3.611252000 |
| C  | 0.885980000  | -1.197975000 | -2.257774000 |
| C  | 2.506252000  | 1.020005000  | -0.749799000 |
| C  | -3.712389000 | -0.896612000 | -0.919023000 |
| C  | -3.116213000 | 0.361865000  | -0.284483000 |
| H  | -1.954151000 | -2.152553000 | -1.135990000 |
| H  | -2.761337000 | -2.346315000 | 0.411889000  |
| H  | -4.849826000 | -2.833541000 | -3.358813000 |
| H  | -4.652139000 | -4.583195000 | -3.505867000 |
| H  | -3.255643000 | -3.521719000 | -3.722254000 |
| H  | -5.231142000 | -4.156846000 | 0.756310000  |
| H  | -5.918139000 | -4.985801000 | -0.644718000 |
| H  | -6.124790000 | -3.240280000 | -0.473171000 |
| H  | -1.686343000 | -5.140424000 | -1.509789000 |
| H  | -3.081599000 | -6.204606000 | -1.293767000 |
| H  | -2.396547000 | -5.361847000 | 0.100953000  |
| H  | -2.708676000 | 2.689983000  | -3.003290000 |
| H  | -1.418475000 | 3.669992000  | -3.690367000 |
| H  | -1.964933000 | 3.968481000  | -2.041792000 |
| H  | -2.652108000 | 0.604146000  | -3.613304000 |
| H  | -1.775071000 | -0.915498000 | -3.404551000 |
| H  | -1.261107000 | 0.240802000  | -4.632205000 |
| H  | 0.048078000  | -1.881787000 | -2.426032000 |

|   |              |              |              |
|---|--------------|--------------|--------------|
| H | 1.464553000  | -1.575146000 | -1.408114000 |
| H | 1.536298000  | -1.268877000 | -3.140139000 |
| H | 3.286132000  | 1.043393000  | -1.522078000 |
| H | 2.592334000  | 0.047189000  | -0.254383000 |
| H | 2.758036000  | 1.791847000  | -0.018744000 |
| H | -4.762180000 | -1.014725000 | -0.604005000 |
| H | -3.763868000 | -0.735537000 | -2.000372000 |
| H | -3.437942000 | 1.256109000  | -0.846351000 |
| C | -0.359368000 | -1.282658000 | 2.053625000  |
| O | -0.036303000 | 0.058779000  | 1.543928000  |
| C | 0.813177000  | 0.764153000  | 2.509552000  |
| C | 0.662790000  | -0.023872000 | 3.797644000  |
| C | 0.520235000  | -1.457608000 | 3.281345000  |
| H | -1.425711000 | -1.284810000 | 2.296562000  |
| H | -0.154981000 | -1.997437000 | 1.253441000  |
| H | 1.837387000  | 0.740703000  | 2.128117000  |
| H | 0.459295000  | 1.796047000  | 2.568814000  |
| H | 1.526349000  | 0.109139000  | 4.454725000  |
| H | -0.237258000 | 0.287539000  | 4.338825000  |
| H | 1.497603000  | -1.863972000 | 3.001708000  |
| H | 0.061794000  | -2.130480000 | 4.011043000  |
| C | -4.060617000 | -0.369968000 | 1.981953000  |
| C | -3.412407000 | 0.580705000  | 1.154193000  |
| C | -3.028965000 | 1.750594000  | 1.843814000  |
| C | -3.267388000 | 2.015559000  | 3.186584000  |
| C | -3.922519000 | 1.049396000  | 3.944105000  |
| C | -4.313127000 | -0.142529000 | 3.329523000  |
| H | -4.410746000 | -1.292450000 | 1.531319000  |
| H | -2.957214000 | 2.959578000  | 3.623947000  |
| H | -4.839237000 | -0.899285000 | 3.905350000  |
| C | 5.351164000  | -1.525899000 | 0.859408000  |
| C | 4.976138000  | -2.694708000 | 0.175083000  |
| C | 5.624864000  | -2.940522000 | -1.048146000 |
| C | 6.574331000  | -2.067601000 | -1.564711000 |
| C | 6.918540000  | -0.915168000 | -0.858277000 |
| C | 6.305632000  | -0.643082000 | 0.361701000  |
| H | 5.393974000  | -3.859612000 | -1.579281000 |
| H | 7.061887000  | -2.297047000 | -2.507862000 |
| H | 6.566460000  | 0.243267000  | 0.931121000  |
| C | 3.983390000  | -3.635655000 | 0.715343000  |
| C | 3.193905000  | -4.432830000 | -0.015583000 |
| H | 3.910177000  | -3.678973000 | 1.800332000  |
| H | 2.516666000  | -5.136675000 | 0.459736000  |
| H | 3.201772000  | -4.424289000 | -1.103100000 |

|    |              |              |              |
|----|--------------|--------------|--------------|
| Si | 1.165428000  | 4.175341000  | -0.979747000 |
| C  | 1.564731000  | 4.272038000  | 0.878518000  |
| H  | 0.658390000  | 4.211200000  | 1.492310000  |
| H  | 2.268377000  | 3.506899000  | 1.221614000  |
| H  | 2.025354000  | 5.246277000  | 1.083333000  |
| C  | 0.006681000  | 5.626600000  | -1.352147000 |
| H  | 0.534950000  | 6.548080000  | -1.077378000 |
| H  | -0.249704000 | 5.702022000  | -2.413081000 |
| H  | -0.922505000 | 5.603762000  | -0.772234000 |
| C  | 2.753294000  | 4.414858000  | -1.984342000 |
| H  | 3.193410000  | 5.393661000  | -1.759982000 |
| H  | 3.507191000  | 3.651923000  | -1.765964000 |
| H  | 2.540950000  | 4.381399000  | -3.058719000 |
| H  | 7.671640000  | -0.234451000 | -1.244855000 |
| H  | -4.132890000 | 1.233032000  | 4.993139000  |
| Cl | 4.597411000  | -1.117952000 | 2.394348000  |
| Cl | -2.147043000 | 3.006992000  | 0.915243000  |

***o*TS2<sup>a</sup><sub>iso</sub>,  $E_{(\text{SCF Done})} = -3024.91696$  a.u.  $\text{IF} = i252.09$  cm<sup>-1</sup>**

|    |              |              |              |
|----|--------------|--------------|--------------|
| Sc | -0.720713000 | 0.024360000  | 0.068541000  |
| Si | 5.507607000  | -0.701876000 | -1.184698000 |
| C  | 3.749704000  | -1.283384000 | -0.674728000 |
| C  | 6.438778000  | -0.095753000 | 0.354313000  |
| C  | 5.388097000  | 0.705992000  | -2.450897000 |
| C  | 6.404518000  | -2.184983000 | -1.945903000 |
| C  | 1.163954000  | 0.972127000  | -2.843942000 |
| C  | -0.182921000 | 0.628785000  | -2.280555000 |
| C  | -1.150308000 | 1.577345000  | -1.833943000 |
| C  | -2.361305000 | 0.875750000  | -1.570556000 |
| C  | -2.168509000 | -0.519617000 | -1.862093000 |
| C  | -0.797185000 | -0.651851000 | -2.295756000 |
| C  | -1.022019000 | 3.065421000  | -1.941942000 |
| C  | -3.631449000 | 1.585497000  | -1.192633000 |
| C  | 2.875987000  | -0.242944000 | 0.043604000  |
| C  | 1.532318000  | -0.790899000 | 0.532236000  |
| H  | 3.873363000  | -2.167714000 | -0.034433000 |
| H  | 3.237342000  | -1.643084000 | -1.579620000 |
| H  | 5.959722000  | 0.779334000  | 0.809167000  |
| H  | 7.461210000  | 0.196365000  | 0.088113000  |
| H  | 6.510496000  | -0.879967000 | 1.117160000  |
| H  | 4.850845000  | 0.390971000  | -3.352999000 |
| H  | 6.390168000  | 1.025030000  | -2.760405000 |
| H  | 4.877706000  | 1.585028000  | -2.040604000 |
| H  | 6.492579000  | -3.008859000 | -1.228521000 |

|   |              |              |              |
|---|--------------|--------------|--------------|
| H | 7.417450000  | -1.906545000 | -2.258452000 |
| H | 5.876813000  | -2.562794000 | -2.829173000 |
| H | 1.063411000  | 1.258351000  | -3.900014000 |
| H | 1.859114000  | 0.128624000  | -2.809520000 |
| H | 1.626416000  | 1.820160000  | -2.329454000 |
| H | -0.004685000 | 3.418013000  | -1.758016000 |
| H | -1.688549000 | 3.591731000  | -1.255222000 |
| H | -1.296897000 | 3.373525000  | -2.960705000 |
| H | -3.463567000 | 2.329815000  | -0.406215000 |
| H | -4.408295000 | 0.900478000  | -0.855459000 |
| H | -4.034146000 | 2.128382000  | -2.058359000 |
| H | 2.684057000  | 0.600392000  | -0.628340000 |
| H | 3.437132000  | 0.179368000  | 0.887319000  |
| H | 1.031867000  | -1.209830000 | -0.371933000 |
| C | -1.981824000 | -0.363964000 | 3.135041000  |
| O | -2.269372000 | -0.264465000 | 1.700447000  |
| C | -3.637353000 | -0.722147000 | 1.458838000  |
| C | -4.042007000 | -1.466973000 | 2.717259000  |
| C | -3.314365000 | -0.670126000 | 3.799631000  |
| H | -1.262201000 | -1.177953000 | 3.272351000  |
| H | -1.541778000 | 0.581221000  | 3.459096000  |
| H | -4.256106000 | 0.163847000  | 1.292136000  |
| H | -3.622660000 | -1.336013000 | 0.558706000  |
| H | -5.127220000 | -1.482831000 | 2.849992000  |
| H | -3.682947000 | -2.501902000 | 2.687507000  |
| H | -3.853279000 | 0.255969000  | 4.027857000  |
| H | -3.181849000 | -1.226200000 | 4.731581000  |
| C | 2.644925000  | -1.922147000 | 2.510464000  |
| C | 1.602861000  | -1.854023000 | 1.565324000  |
| C | 0.611572000  | -2.838485000 | 1.703719000  |
| C | 0.641937000  | -3.851996000 | 2.651479000  |
| C | 1.700943000  | -3.887654000 | 3.557628000  |
| C | 2.694125000  | -2.913194000 | 3.487059000  |
| H | 3.445752000  | -1.191156000 | 2.463914000  |
| H | -0.147164000 | -4.596763000 | 2.682234000  |
| H | 3.521664000  | -2.928363000 | 4.190440000  |
| C | -0.432530000 | 4.343679000  | 1.089950000  |
| C | 0.394839000  | 3.210905000  | 0.963254000  |
| C | 1.681814000  | 3.444035000  | 0.442437000  |
| C | 2.114335000  | 4.712448000  | 0.072534000  |
| C | 1.264823000  | 5.809184000  | 0.210841000  |
| C | -0.014335000 | 5.620170000  | 0.725815000  |
| H | 2.360898000  | 2.604027000  | 0.326098000  |
| H | 3.117554000  | 4.844121000  | -0.323315000 |

|    |              |              |              |
|----|--------------|--------------|--------------|
| H  | -0.692053000 | 6.458375000  | 0.852279000  |
| C  | -0.043747000 | 1.883179000  | 1.415679000  |
| C  | 0.856817000  | 0.884870000  | 1.828369000  |
| H  | -1.035630000 | 1.867422000  | 1.866315000  |
| H  | 0.541057000  | 0.176843000  | 2.591619000  |
| H  | 1.915095000  | 1.116221000  | 1.889078000  |
| C  | -0.147660000 | -1.889149000 | -2.853360000 |
| H  | -0.642763000 | -2.804898000 | -2.522560000 |
| H  | -0.181545000 | -1.873067000 | -3.950411000 |
| H  | 0.908962000  | -1.970787000 | -2.575871000 |
| Si | -3.518577000 | -1.803038000 | -2.349632000 |
| C  | -5.290107000 | -1.210606000 | -2.009893000 |
| H  | -5.525176000 | -0.280907000 | -2.537177000 |
| H  | -5.963221000 | -1.983580000 | -2.401757000 |
| H  | -5.537581000 | -1.080084000 | -0.951052000 |
| C  | -3.378543000 | -2.019724000 | -4.227366000 |
| H  | -2.437366000 | -2.487102000 | -4.531509000 |
| H  | -4.195885000 | -2.657009000 | -4.585444000 |
| H  | -3.459061000 | -1.053892000 | -4.738449000 |
| C  | -3.342108000 | -3.504399000 | -1.521036000 |
| H  | -2.376662000 | -3.984273000 | -1.708755000 |
| H  | -3.505010000 | -3.477524000 | -0.437603000 |
| H  | -4.114114000 | -4.160122000 | -1.942850000 |
| H  | 1.591418000  | 6.804812000  | -0.073805000 |
| H  | 1.741612000  | -4.670381000 | 4.308871000  |
| Cl | -0.768384000 | -2.790174000 | 0.594348000  |
| Cl | -2.058509000 | 4.189345000  | 1.736158000  |

***oP2***<sub>iso</sub>,  $E_{(\text{SCF Done})} = -3024.957615$  a.u.

|    |              |              |              |
|----|--------------|--------------|--------------|
| Sc | 1.386749000  | 0.398805000  | -0.193726000 |
| Si | -5.896625000 | -0.034595000 | 1.313417000  |
| C  | -4.209329000 | -0.694812000 | 0.688018000  |
| C  | -7.165666000 | -0.082038000 | -0.096565000 |
| C  | -5.702831000 | 1.747821000  | 1.936987000  |
| C  | -6.466966000 | -1.156435000 | 2.730309000  |
| C  | -1.008660000 | 1.415826000  | 2.240250000  |
| C  | 0.378359000  | 0.897223000  | 2.006598000  |
| C  | 1.542578000  | 1.711602000  | 1.893658000  |
| C  | 2.682193000  | 0.856781000  | 1.850546000  |
| C  | 2.241057000  | -0.507711000 | 1.939868000  |
| C  | 0.801860000  | -0.460653000 | 2.035861000  |
| C  | 1.561613000  | 3.204954000  | 2.028164000  |
| C  | 4.092976000  | 1.376651000  | 1.848270000  |
| C  | -3.536547000 | 0.122762000  | -0.419756000 |

|   |              |              |              |
|---|--------------|--------------|--------------|
| C | -2.192968000 | -0.433443000 | -0.927249000 |
| H | -4.363427000 | -1.732554000 | 0.362407000  |
| H | -3.540292000 | -0.759282000 | 1.559426000  |
| H | -6.874691000 | 0.562910000  | -0.933826000 |
| H | -8.143521000 | 0.264247000  | 0.257789000  |
| H | -7.297490000 | -1.100075000 | -0.481671000 |
| H | -4.952567000 | 1.815553000  | 2.733561000  |
| H | -6.651508000 | 2.115124000  | 2.345185000  |
| H | -5.406465000 | 2.430945000  | 1.132589000  |
| H | -6.579569000 | -2.193965000 | 2.395039000  |
| H | -7.435993000 | -0.827590000 | 3.122930000  |
| H | -5.751968000 | -1.147822000 | 3.561213000  |
| H | -1.104168000 | 1.789512000  | 3.268821000  |
| H | -1.763608000 | 0.636905000  | 2.109976000  |
| H | -1.259315000 | 2.244373000  | 1.569781000  |
| H | 0.658929000  | 3.668993000  | 1.622946000  |
| H | 2.425034000  | 3.660076000  | 1.534701000  |
| H | 1.619803000  | 3.476287000  | 3.091404000  |
| H | 4.185788000  | 2.298603000  | 1.263533000  |
| H | 4.810196000  | 0.653743000  | 1.457403000  |
| H | 4.411155000  | 1.622035000  | 2.870353000  |
| H | -3.340443000 | 1.135727000  | -0.046061000 |
| H | -4.219302000 | 0.257568000  | -1.270761000 |
| H | -1.537075000 | -0.513238000 | -0.050235000 |
| C | 2.769846000  | -0.535052000 | -2.989906000 |
| O | 2.958845000  | -0.371122000 | -1.540672000 |
| C | 4.376059000  | -0.530873000 | -1.217469000 |
| C | 4.972373000  | -1.240130000 | -2.418494000 |
| C | 4.171658000  | -0.634512000 | -3.572732000 |
| H | 2.187369000  | -1.448372000 | -3.135215000 |
| H | 2.205709000  | 0.325912000  | -3.355135000 |
| H | 4.806265000  | 0.466773000  | -1.076819000 |
| H | 4.432707000  | -1.090940000 | -0.284674000 |
| H | 6.048011000  | -1.063591000 | -2.503712000 |
| H | 4.805396000  | -2.320958000 | -2.350531000 |
| H | 4.555993000  | 0.359022000  | -3.828519000 |
| H | 4.188706000  | -1.248618000 | -4.477031000 |
| C | -3.466438000 | -2.311063000 | -2.124135000 |
| C | -2.289733000 | -1.818600000 | -1.539631000 |
| C | -1.182396000 | -2.666089000 | -1.637909000 |
| C | -1.205430000 | -3.921024000 | -2.236261000 |
| C | -2.400253000 | -4.372781000 | -2.789652000 |
| C | -3.529186000 | -3.559622000 | -2.737116000 |
| H | -4.359329000 | -1.694783000 | -2.095603000 |

|    |              |              |              |
|----|--------------|--------------|--------------|
| H  | -0.308905000 | -4.531810000 | -2.267274000 |
| H  | -4.465219000 | -3.896814000 | -3.172823000 |
| C  | 0.797095000  | 3.561539000  | -1.212251000 |
| C  | -0.346449000 | 2.743924000  | -1.250795000 |
| C  | -1.555087000 | 3.443911000  | -1.059342000 |
| C  | -1.597056000 | 4.824998000  | -0.885147000 |
| C  | -0.428384000 | 5.584380000  | -0.898897000 |
| C  | 0.796237000  | 4.938790000  | -1.062342000 |
| H  | -2.487055000 | 2.888517000  | -1.069326000 |
| H  | -2.558176000 | 5.313466000  | -0.749774000 |
| H  | 1.729171000  | 5.493573000  | -1.061286000 |
| C  | -0.237441000 | 1.280476000  | -1.480901000 |
| C  | -1.493422000 | 0.526230000  | -1.945655000 |
| H  | 0.508801000  | 1.170713000  | -2.297028000 |
| H  | -1.205408000 | -0.068483000 | -2.819850000 |
| H  | -2.250036000 | 1.223303000  | -2.333379000 |
| C  | -0.109756000 | -1.620471000 | 2.325566000  |
| H  | 0.327475000  | -2.576115000 | 2.028640000  |
| H  | -0.318430000 | -1.671903000 | 3.402130000  |
| H  | -1.076379000 | -1.533077000 | 1.819515000  |
| Si | 3.262402000  | -2.061449000 | 2.417289000  |
| C  | 5.126854000  | -1.725998000 | 2.549580000  |
| H  | 5.352560000  | -0.926854000 | 3.262544000  |
| H  | 5.590290000  | -2.643652000 | 2.933035000  |
| H  | 5.624359000  | -1.490950000 | 1.602681000  |
| C  | 2.701585000  | -2.594924000 | 4.147249000  |
| H  | 1.663521000  | -2.938471000 | 4.172906000  |
| H  | 3.333246000  | -3.419578000 | 4.498514000  |
| H  | 2.803226000  | -1.769800000 | 4.861061000  |
| C  | 3.026769000  | -3.503575000 | 1.202000000  |
| H  | 1.991235000  | -3.854702000 | 1.157010000  |
| H  | 3.335260000  | -3.248808000 | 0.181367000  |
| H  | 3.645066000  | -4.348002000 | 1.530213000  |
| H  | -0.460435000 | 6.662659000  | -0.778178000 |
| H  | -2.439296000 | -5.351217000 | -3.258987000 |
| Cl | 0.410331000  | -2.183352000 | -0.984189000 |
| Cl | 2.383832000  | 2.748399000  | -1.331785000 |

**oC1<sup>b</sup>**,  $E_{(\text{SCF Done})} = -1979.702112$  a.u.

|    |              |             |              |
|----|--------------|-------------|--------------|
| Sc | -0.513019000 | 0.247042000 | -0.097288000 |
| N  | 0.866864000  | 2.088918000 | -0.240994000 |
| C  | -1.183066000 | 1.096639000 | -2.008456000 |
| H  | -0.302323000 | 1.034017000 | -2.660601000 |
| H  | -2.071592000 | 0.816157000 | -2.575701000 |

|   |              |              |              |
|---|--------------|--------------|--------------|
| C | -1.340548000 | 2.381738000  | -1.299555000 |
| C | -0.364050000 | 2.863647000  | -0.378096000 |
| C | -0.575384000 | 4.042195000  | 0.354497000  |
| H | 0.190078000  | 4.409950000  | 1.029863000  |
| C | -1.753313000 | 4.758627000  | 0.210256000  |
| H | -1.902177000 | 5.675393000  | 0.772831000  |
| C | -2.737576000 | 4.297425000  | -0.672822000 |
| H | -3.659443000 | 4.858233000  | -0.800241000 |
| C | -2.534099000 | 3.136037000  | -1.397383000 |
| H | -3.294717000 | 2.794632000  | -2.094173000 |
| C | 1.579834000  | 2.280568000  | 1.036550000  |
| H | 2.046450000  | 3.272282000  | 1.101705000  |
| H | 2.371312000  | 1.530072000  | 1.112380000  |
| H | 0.892520000  | 2.163898000  | 1.879458000  |
| C | 1.804463000  | 2.335638000  | -1.359558000 |
| H | 1.287267000  | 2.239897000  | -2.314706000 |
| H | 2.624532000  | 1.614789000  | -1.314742000 |
| H | 2.212454000  | 3.352500000  | -1.287739000 |
| C | -1.907648000 | 0.328499000  | 1.903812000  |
| C | -2.736540000 | -0.125552000 | 0.831206000  |
| C | -2.265162000 | -1.406442000 | 0.390575000  |
| C | -1.141769000 | -1.736840000 | 1.228155000  |
| C | -0.921587000 | -0.672703000 | 2.150738000  |
| C | -3.975644000 | 0.592809000  | 0.382456000  |
| H | -4.145079000 | 0.507692000  | -0.692020000 |
| H | -3.935781000 | 1.655963000  | 0.632006000  |
| H | -4.856740000 | 0.175142000  | 0.887473000  |
| C | -0.436547000 | -3.063956000 | 1.296054000  |
| H | 0.570334000  | -2.980931000 | 1.718246000  |
| H | -0.356453000 | -3.561025000 | 0.324608000  |
| H | -0.988178000 | -3.746590000 | 1.955243000  |
| C | 0.076778000  | -0.675204000 | 3.274092000  |
| H | -0.322124000 | -1.220966000 | 4.139449000  |
| H | 0.314587000  | 0.334877000  | 3.622309000  |
| H | 1.019269000  | -1.160557000 | 3.000032000  |
| C | -2.142225000 | 1.563387000  | 2.727848000  |
| H | -2.945605000 | 1.388204000  | 3.455463000  |
| H | -1.255249000 | 1.851015000  | 3.301566000  |
| H | -2.436575000 | 2.424555000  | 2.120508000  |
| C | 6.289723000  | -0.161871000 | -1.119863000 |
| C | 5.834001000  | -0.395754000 | 0.174903000  |
| C | 4.516629000  | -0.796585000 | 0.377433000  |
| C | 3.621115000  | -0.967505000 | -0.698430000 |
| C | 4.119999000  | -0.730978000 | -1.994847000 |



|    |              |              |              |
|----|--------------|--------------|--------------|
| C  | 5.431554000  | -0.330754000 | -2.207888000 |
| H  | 6.493921000  | -0.273096000 | 1.027392000  |
| H  | 3.470518000  | -0.907609000 | -2.847430000 |
| H  | 5.791383000  | -0.169892000 | -3.219524000 |
| C  | 2.252073000  | -1.439696000 | -0.491670000 |
| C  | 1.217739000  | -1.299671000 | -1.352467000 |
| H  | 2.077285000  | -1.985376000 | 0.433064000  |
| H  | 0.300995000  | -1.873390000 | -1.197109000 |
| H  | 1.318851000  | -0.798429000 | -2.311681000 |
| Si | -3.093418000 | -2.624576000 | -0.839993000 |
| C  | -3.632314000 | -4.153539000 | 0.141506000  |
| H  | -4.176513000 | -4.841543000 | -0.516303000 |
| H  | -2.786527000 | -4.702819000 | 0.566426000  |
| H  | -4.302765000 | -3.876554000 | 0.962743000  |
| C  | -1.903582000 | -3.146585000 | -2.230045000 |
| H  | -1.015751000 | -3.686188000 | -1.882228000 |
| H  | -2.438578000 | -3.825417000 | -2.905542000 |
| H  | -1.580570000 | -2.286035000 | -2.828372000 |
| C  | -4.622933000 | -1.905537000 | -1.692598000 |
| H  | -5.400500000 | -1.599875000 | -0.986449000 |
| H  | -4.389661000 | -1.057185000 | -2.344684000 |
| H  | -5.047912000 | -2.694173000 | -2.325887000 |
| Cl | 3.994232000  | -1.062803000 | 2.021774000  |
| H  | 7.320791000  | 0.141567000  | -1.276325000 |

***o*TS1<sup>b</sup>**,  $E_{(\text{SCF Done})} = -1979.678445$  a.u.  $\text{IF} = i294.62$   $\text{cm}^{-1}$

|    |              |              |              |
|----|--------------|--------------|--------------|
| Sc | 0.225687000  | -0.037039000 | 0.162443000  |
| N  | 1.002842000  | 2.137338000  | 0.630494000  |
| C  | 0.091119000  | 1.101256000  | -1.995506000 |
| H  | 1.076377000  | 1.514831000  | -2.215136000 |
| H  | -0.443329000 | 0.972386000  | -2.934700000 |
| C  | -0.709029000 | 2.041298000  | -1.143897000 |
| C  | -0.250679000 | 2.615869000  | 0.071150000  |
| C  | -0.999208000 | 3.617791000  | 0.706695000  |
| H  | -0.634077000 | 4.072545000  | 1.620561000  |
| C  | -2.199054000 | 4.058769000  | 0.169845000  |
| H  | -2.752235000 | 4.851371000  | 0.664919000  |
| C  | -2.686369000 | 3.481337000  | -1.006173000 |
| H  | -3.622839000 | 3.822169000  | -1.438055000 |
| C  | -1.958983000 | 2.483739000  | -1.632720000 |
| H  | -2.324551000 | 2.060537000  | -2.564169000 |
| C  | 1.134227000  | 2.372867000  | 2.083019000  |
| H  | 1.275169000  | 3.437629000  | 2.309019000  |
| H  | 2.011086000  | 1.832817000  | 2.443450000  |

|    |              |              |              |
|----|--------------|--------------|--------------|
| H  | 0.247991000  | 2.010269000  | 2.607056000  |
| C  | 2.192720000  | 2.726916000  | -0.033738000 |
| H  | 2.126864000  | 2.634923000  | -1.116204000 |
| H  | 3.089349000  | 2.205754000  | 0.309330000  |
| H  | 2.269966000  | 3.792401000  | 0.218756000  |
| C  | -0.802231000 | -0.902276000 | 2.254400000  |
| C  | -1.830266000 | -0.328260000 | 1.454942000  |
| C  | -1.982306000 | -1.119715000 | 0.257588000  |
| C  | -1.043862000 | -2.205742000 | 0.374698000  |
| C  | -0.319131000 | -2.067767000 | 1.581822000  |
| C  | -2.713270000 | 0.804021000  | 1.896777000  |
| H  | -3.047653000 | 1.421079000  | 1.061903000  |
| H  | -2.214804000 | 1.460918000  | 2.616360000  |
| H  | -3.609116000 | 0.413302000  | 2.397436000  |
| C  | -0.949367000 | -3.415581000 | -0.510611000 |
| H  | 0.076941000  | -3.784707000 | -0.618723000 |
| H  | -1.347395000 | -3.239485000 | -1.512946000 |
| H  | -1.526418000 | -4.242650000 | -0.076861000 |
| C  | 0.626301000  | -3.085657000 | 2.147742000  |
| H  | 0.064207000  | -3.954316000 | 2.516436000  |
| H  | 1.201374000  | -2.693353000 | 2.990609000  |
| H  | 1.341204000  | -3.461575000 | 1.407074000  |
| C  | -0.421411000 | -0.506954000 | 3.654478000  |
| H  | -0.824358000 | -1.232521000 | 4.373072000  |
| H  | 0.662823000  | -0.476507000 | 3.815819000  |
| H  | -0.829304000 | 0.468018000  | 3.935199000  |
| C  | 5.805706000  | -0.130427000 | -1.021892000 |
| C  | 5.070647000  | -0.233831000 | 0.157980000  |
| C  | 3.726182000  | -0.569744000 | 0.067513000  |
| C  | 3.060583000  | -0.842264000 | -1.134749000 |
| C  | 3.838027000  | -0.717265000 | -2.299759000 |
| C  | 5.183564000  | -0.363607000 | -2.248325000 |
| H  | 5.529917000  | -0.049543000 | 1.124033000  |
| H  | 3.381262000  | -0.940341000 | -3.260537000 |
| H  | 5.754745000  | -0.289656000 | -3.169257000 |
| C  | 1.639892000  | -1.266840000 | -1.148758000 |
| C  | 0.759478000  | -0.817214000 | -2.167598000 |
| H  | 1.431060000  | -2.229424000 | -0.687333000 |
| H  | -0.162202000 | -1.377624000 | -2.311987000 |
| H  | 1.166383000  | -0.451121000 | -3.106612000 |
| Si | -3.513859000 | -1.225015000 | -0.894448000 |
| C  | -4.406693000 | -2.843733000 | -0.470115000 |
| H  | -5.349111000 | -2.902185000 | -1.027803000 |
| H  | -3.820018000 | -3.733018000 | -0.718955000 |

|    |              |              |              |
|----|--------------|--------------|--------------|
| H  | -4.648863000 | -2.886427000 | 0.597776000  |
| C  | -3.064699000 | -1.241085000 | -2.743305000 |
| H  | -2.473164000 | -2.114080000 | -3.039815000 |
| H  | -3.992392000 | -1.273876000 | -3.327604000 |
| H  | -2.520503000 | -0.340782000 | -3.047496000 |
| C  | -4.767184000 | 0.169817000  | -0.622276000 |
| H  | -5.164704000 | 0.169994000  | 0.397286000  |
| H  | -4.371881000 | 1.165697000  | -0.839089000 |
| H  | -5.611159000 | -0.007578000 | -1.300492000 |
| Cl | 2.765373000  | -0.628543000 | 1.552183000  |
| H  | 6.858496000  | 0.131743000  | -0.977297000 |

***oP1<sup>b</sup>***,  $E_{(\text{SCF Done})} = -1979.716676$  a.u.

|    |              |              |              |
|----|--------------|--------------|--------------|
| Sc | 0.200567000  | -0.425614000 | 0.340887000  |
| N  | 0.819712000  | 1.442343000  | 1.590695000  |
| C  | 0.967775000  | 2.442882000  | -1.370626000 |
| H  | 1.973389000  | 2.510668000  | -0.948660000 |
| H  | 0.918853000  | 3.252050000  | -2.106406000 |
| C  | -0.113052000 | 2.757111000  | -0.342114000 |
| C  | -0.190967000 | 2.332307000  | 1.014372000  |
| C  | -1.253747000 | 2.773181000  | 1.821995000  |
| H  | -1.304596000 | 2.480702000  | 2.863714000  |
| C  | -2.241066000 | 3.619806000  | 1.332757000  |
| H  | -3.037321000 | 3.953960000  | 1.991349000  |
| C  | -2.183463000 | 4.042191000  | 0.009258000  |
| H  | -2.938757000 | 4.710224000  | -0.393830000 |
| C  | -1.134825000 | 3.611371000  | -0.793167000 |
| H  | -1.083634000 | 3.961932000  | -1.820953000 |
| C  | 0.478768000  | 0.897232000  | 2.923555000  |
| H  | 0.461702000  | 1.675368000  | 3.697890000  |
| H  | 1.248531000  | 0.170422000  | 3.198402000  |
| H  | -0.497295000 | 0.400998000  | 2.915997000  |
| C  | 2.152254000  | 2.083831000  | 1.721306000  |
| H  | 2.488527000  | 2.497048000  | 0.775823000  |
| H  | 2.878049000  | 1.337133000  | 2.049649000  |
| H  | 2.098738000  | 2.891229000  | 2.463007000  |
| C  | -0.768768000 | -2.509850000 | 1.243098000  |
| C  | -1.807244000 | -1.540419000 | 1.159098000  |
| C  | -2.022686000 | -1.207141000 | -0.226701000 |
| C  | -1.117090000 | -2.037748000 | -0.985566000 |
| C  | -0.353440000 | -2.825661000 | -0.090989000 |
| C  | -2.611363000 | -1.059295000 | 2.336831000  |
| H  | -2.855127000 | 0.005705000  | 2.280727000  |
| H  | -2.097054000 | -1.246395000 | 3.285605000  |

|    |              |              |              |
|----|--------------|--------------|--------------|
| H  | -3.565118000 | -1.599546000 | 2.394716000  |
| C  | -1.063182000 | -2.178108000 | -2.479392000 |
| H  | -0.121982000 | -2.628686000 | -2.808681000 |
| H  | -1.174873000 | -1.223110000 | -2.999504000 |
| H  | -1.867009000 | -2.836382000 | -2.833587000 |
| C  | 0.628342000  | -3.889198000 | -0.488055000 |
| H  | 0.098048000  | -4.769090000 | -0.874715000 |
| H  | 1.236783000  | -4.225390000 | 0.355428000  |
| H  | 1.314182000  | -3.555411000 | -1.274686000 |
| C  | -0.292062000 | -3.193859000 | 2.494792000  |
| H  | -0.923983000 | -4.062191000 | 2.723124000  |
| H  | 0.732894000  | -3.566585000 | 2.400254000  |
| H  | -0.326104000 | -2.540527000 | 3.373481000  |
| C  | 5.759804000  | 0.150846000  | -0.605896000 |
| C  | 4.924428000  | -0.581483000 | 0.234554000  |
| C  | 3.567392000  | -0.604995000 | -0.057218000 |
| C  | 2.956779000  | 0.027467000  | -1.145688000 |
| C  | 3.846035000  | 0.759272000  | -1.956434000 |
| C  | 5.212716000  | 0.824615000  | -1.696901000 |
| H  | 5.317585000  | -1.112650000 | 1.095645000  |
| H  | 3.451596000  | 1.274810000  | -2.827807000 |
| H  | 5.856618000  | 1.396789000  | -2.358967000 |
| C  | 1.483800000  | -0.104380000 | -1.425583000 |
| C  | 0.853997000  | 1.103198000  | -2.136484000 |
| H  | 1.348449000  | -0.987873000 | -2.066371000 |
| H  | -0.206868000 | 0.897670000  | -2.342809000 |
| H  | 1.297827000  | 1.258453000  | -3.132617000 |
| Si | -3.599950000 | -0.413736000 | -0.983172000 |
| C  | -4.688328000 | -1.857890000 | -1.552665000 |
| H  | -5.636805000 | -1.477309000 | -1.950222000 |
| H  | -4.214532000 | -2.453609000 | -2.339672000 |
| H  | -4.919961000 | -2.527965000 | -0.717288000 |
| C  | -3.234574000 | 0.726218000  | -2.454491000 |
| H  | -2.777299000 | 0.213245000  | -3.305599000 |
| H  | -4.184857000 | 1.147111000  | -2.805469000 |
| H  | -2.593487000 | 1.565117000  | -2.163954000 |
| C  | -4.594201000 | 0.610058000  | 0.264291000  |
| H  | -4.993022000 | 0.010555000  | 1.087819000  |
| H  | -4.022327000 | 1.445277000  | 0.681357000  |
| H  | -5.452383000 | 1.036479000  | -0.270011000 |
| H  | 6.825663000  | 0.192333000  | -0.403157000 |
| Cl | 2.513187000  | -1.521654000 | 1.064369000  |

***oC2***<sup>b</sup><sub>syn</sub>,  $E_{(\text{SCF Done})} = -2748.79036$  a.u.

|   |               |               |               |
|---|---------------|---------------|---------------|
| N | 5. 755138000  | -0. 157324000 | -1. 838748000 |
| C | 3. 901431000  | 1. 895765000  | -0. 932841000 |
| H | 4. 402617000  | 2. 094595000  | -1. 883925000 |
| H | 3. 668225000  | 2. 871517000  | -0. 488823000 |
| C | 4. 798384000  | 1. 131869000  | 0. 011949000  |
| C | 5. 651587000  | 0. 095864000  | -0. 437453000 |
| C | 6. 361711000  | -0. 659514000 | 0. 504613000  |
| H | 7. 020573000  | -1. 454563000 | 0. 168298000  |
| C | 6. 256337000  | -0. 398308000 | 1. 870329000  |
| H | 6. 824857000  | -0. 996245000 | 2. 578051000  |
| C | 5. 450882000  | 0. 644885000  | 2. 315703000  |
| H | 5. 381423000  | 0. 876774000  | 3. 375154000  |
| C | 4. 735320000  | 1. 397290000  | 1. 383848000  |
| H | 4. 104815000  | 2. 215631000  | 1. 727779000  |
| C | 6. 068455000  | -1. 524943000 | -2. 218884000 |
| H | 7. 118648000  | -1. 813138000 | -2. 032763000 |
| H | 5. 885645000  | -1. 641331000 | -3. 293339000 |
| H | 5. 420780000  | -2. 224052000 | -1. 681228000 |
| C | 6. 637518000  | 0. 777884000  | -2. 536092000 |
| H | 6. 420493000  | 1. 807338000  | -2. 242189000 |
| H | 6. 485982000  | 0. 686801000  | -3. 617795000 |
| H | 7. 702381000  | 0. 584779000  | -2. 318275000 |
| C | 1. 148805000  | -2. 247775000 | 0. 083734000  |
| C | 0. 085798000  | -2. 408182000 | 1. 022051000  |
| C | -1. 167029000 | -2. 459670000 | 0. 314101000  |
| C | -0. 844825000 | -2. 319485000 | -1. 078116000 |
| C | 0. 570199000  | -2. 176259000 | -1. 214286000 |
| C | 0. 298161000  | -2. 649329000 | 2. 491938000  |
| H | -0. 557891000 | -2. 341231000 | 3. 099073000  |
| H | 1. 183046000  | -2. 128307000 | 2. 871283000  |
| H | 0. 457055000  | -3. 718855000 | 2. 679456000  |
| C | -1. 752845000 | -2. 482929000 | -2. 265232000 |
| H | -1. 498591000 | -1. 799687000 | -3. 084411000 |
| H | -2. 805236000 | -2. 347865000 | -2. 015802000 |
| H | -1. 650311000 | -3. 498157000 | -2. 672144000 |
| C | 1. 304807000  | -2. 134015000 | -2. 523125000 |
| H | 1. 233721000  | -3. 107290000 | -3. 026679000 |
| H | 2. 366376000  | -1. 915532000 | -2. 389201000 |
| H | 0. 898889000  | -1. 390523000 | -3. 219566000 |
| C | 2. 611311000  | -2. 295453000 | 0. 404867000  |
| H | 2. 964895000  | -3. 335189000 | 0. 387794000  |
| H | 3. 215655000  | -1. 731554000 | -0. 309248000 |
| H | 2. 834411000  | -1. 898946000 | 1. 399642000  |
| C | 0. 100773000  | 2. 165052000  | 1. 554285000  |

|    |              |              |              |
|----|--------------|--------------|--------------|
| C  | 0.927044000  | 2.175267000  | 0.405196000  |
| C  | 0.904935000  | 3.414899000  | -0.292131000 |
| C  | 0.187752000  | 4.513289000  | 0.154777000  |
| C  | -0.578600000 | 4.447992000  | 1.326050000  |
| C  | -0.626293000 | 3.254204000  | 2.033501000  |
| H  | 1.504898000  | 3.509152000  | -1.190980000 |
| H  | 0.237555000  | 5.443056000  | -0.405417000 |
| H  | -1.206723000 | 3.160827000  | 2.946151000  |
| C  | 1.629334000  | 0.974707000  | -0.078086000 |
| C  | 2.586779000  | 1.138065000  | -1.249568000 |
| H  | 2.127231000  | 0.463587000  | 0.760400000  |
| H  | 2.082757000  | 1.642734000  | -2.086856000 |
| H  | 2.865335000  | 0.152403000  | -1.633734000 |
| C  | -5.291369000 | 1.098388000  | -1.227566000 |
| C  | -3.955640000 | 1.469636000  | -0.955220000 |
| C  | -3.751617000 | 2.554441000  | -0.079425000 |
| C  | -4.814029000 | 3.227015000  | 0.503524000  |
| C  | -6.123693000 | 2.834368000  | 0.217945000  |
| C  | -6.363390000 | 1.773610000  | -0.649981000 |
| H  | -2.736585000 | 2.864727000  | 0.151223000  |
| H  | -4.626771000 | 4.056961000  | 1.177938000  |
| H  | -7.376945000 | 1.469075000  | -0.888594000 |
| C  | -2.841680000 | 0.764298000  | -1.576797000 |
| C  | -1.548218000 | 1.171542000  | -1.654031000 |
| H  | -3.098876000 | -0.172495000 | -2.063040000 |
| H  | -0.863407000 | 0.621659000  | -2.307253000 |
| H  | -1.222074000 | 2.157771000  | -1.332272000 |
| Sc | -0.249449000 | -0.229876000 | 0.037471000  |
| Si | -2.830472000 | -2.915245000 | 1.157149000  |
| C  | -2.587265000 | -4.521836000 | 2.131321000  |
| H  | -1.925590000 | -4.416550000 | 2.995538000  |
| H  | -3.560234000 | -4.866591000 | 2.501686000  |
| H  | -2.180949000 | -5.308887000 | 1.486059000  |
| C  | -4.232575000 | -3.232236000 | -0.074463000 |
| H  | -3.988373000 | -4.022478000 | -0.791832000 |
| H  | -5.101440000 | -3.574389000 | 0.501540000  |
| H  | -4.547005000 | -2.341657000 | -0.627229000 |
| C  | -3.388020000 | -1.514840000 | 2.316834000  |
| H  | -2.659024000 | -1.287201000 | 3.102064000  |
| H  | -3.595868000 | -0.589943000 | 1.764050000  |
| H  | -4.320317000 | -1.806889000 | 2.815365000  |
| H  | -6.963403000 | 3.356225000  | 0.667741000  |
| H  | -1.121520000 | 5.316375000  | 1.686001000  |
| Cl | -5.660873000 | -0.190993000 | -2.338554000 |

Cl -0.005213000 0.646658000 2.492963000

***o*TS2<sup>b</sup><sub>syn</sub>,  $E_{(\text{SCF Done})} = -2748.777151$  a.u.  $\text{IF} = i213.06$  cm<sup>-1</sup>**

|   |              |              |              |
|---|--------------|--------------|--------------|
| N | -5.484623000 | -0.602161000 | 1.698981000  |
| C | -3.866740000 | 1.491221000  | 0.498450000  |
| H | -4.603013000 | 1.738016000  | 1.266209000  |
| H | -3.837402000 | 2.341183000  | -0.193389000 |
| C | -4.286049000 | 0.252774000  | -0.257804000 |
| C | -5.041796000 | -0.774621000 | 0.354666000  |
| C | -5.329267000 | -1.935953000 | -0.375613000 |
| H | -5.911454000 | -2.727878000 | 0.086033000  |
| C | -4.900347000 | -2.088232000 | -1.693249000 |
| H | -5.146501000 | -2.995733000 | -2.238500000 |
| C | -4.191653000 | -1.063286000 | -2.314104000 |
| H | -3.884722000 | -1.153638000 | -3.352756000 |
| C | -3.895856000 | 0.093918000  | -1.592030000 |
| H | -3.356736000 | 0.904741000  | -2.079302000 |
| C | -5.618364000 | -1.816858000 | 2.487631000  |
| H | -6.497027000 | -2.430647000 | 2.220445000  |
| H | -5.724182000 | -1.539428000 | 3.542453000  |
| H | -4.721438000 | -2.434172000 | 2.383206000  |
| C | -6.692288000 | 0.216316000  | 1.811910000  |
| H | -6.600733000 | 1.126576000  | 1.214011000  |
| H | -6.842152000 | 0.503101000  | 2.858863000  |
| H | -7.592951000 | -0.320984000 | 1.467803000  |
| C | -0.319553000 | -2.108023000 | 0.629397000  |
| C | 0.345710000  | -2.187205000 | -0.627847000 |
| C | 1.764918000  | -2.088567000 | -0.410335000 |
| C | 1.950848000  | -1.986011000 | 1.014628000  |
| C | 0.673875000  | -1.983239000 | 1.645869000  |
| C | -0.354367000 | -2.509473000 | -1.917665000 |
| H | 0.235801000  | -2.235610000 | -2.794929000 |
| H | -1.329435000 | -2.018702000 | -1.997173000 |
| H | -0.538078000 | -3.590559000 | -1.976719000 |
| C | 3.255325000  | -2.046277000 | 1.753102000  |
| H | 3.159039000  | -1.693085000 | 2.781873000  |
| H | 4.042738000  | -1.463018000 | 1.273100000  |
| H | 3.605161000  | -3.085728000 | 1.804251000  |
| C | 0.392807000  | -2.005579000 | 3.119972000  |
| H | 0.194238000  | -3.032581000 | 3.453840000  |
| H | -0.489417000 | -1.411141000 | 3.383109000  |
| H | 1.234630000  | -1.635941000 | 3.711647000  |
| C | -1.782886000 | -2.334817000 | 0.862528000  |
| H | -1.980128000 | -3.411794000 | 0.953497000  |

|    |              |              |              |
|----|--------------|--------------|--------------|
| H  | -2.130524000 | -1.868741000 | 1.789173000  |
| H  | -2.407680000 | -1.964327000 | 0.045215000  |
| C  | -0.464685000 | 2.326349000  | -1.862892000 |
| C  | -1.106105000 | 2.442163000  | -0.616570000 |
| C  | -1.570965000 | 3.740481000  | -0.315018000 |
| C  | -1.440459000 | 4.802204000  | -1.203902000 |
| C  | -0.836457000 | 4.616623000  | -2.446631000 |
| C  | -0.335031000 | 3.361169000  | -2.780576000 |
| H  | -2.069376000 | 3.910959000  | 0.634071000  |
| H  | -1.823920000 | 5.779661000  | -0.926315000 |
| H  | 0.156549000  | 3.188416000  | -3.732760000 |
| C  | -1.264482000 | 1.314200000  | 0.339702000  |
| C  | -2.506832000 | 1.377537000  | 1.229684000  |
| H  | -1.326520000 | 0.350928000  | -0.219718000 |
| H  | -2.430191000 | 2.236801000  | 1.908601000  |
| H  | -2.531351000 | 0.490537000  | 1.872299000  |
| C  | 3.934924000  | 1.375980000  | 1.807236000  |
| C  | 2.600967000  | 1.584175000  | 1.367620000  |
| C  | 2.446057000  | 2.095356000  | 0.053500000  |
| C  | 3.541783000  | 2.348342000  | -0.782384000 |
| C  | 4.826942000  | 2.097448000  | -0.325573000 |
| C  | 5.019214000  | 1.628937000  | 0.980753000  |
| H  | 1.462765000  | 2.454070000  | -0.261807000 |
| H  | 3.377569000  | 2.765922000  | -1.771316000 |
| H  | 6.022882000  | 1.478745000  | 1.366441000  |
| C  | 1.432174000  | 1.210206000  | 2.143126000  |
| C  | 0.166397000  | 1.805073000  | 1.966363000  |
| H  | 1.577458000  | 0.559197000  | 2.998671000  |
| H  | -0.571289000 | 1.570503000  | 2.726264000  |
| H  | 0.100872000  | 2.815936000  | 1.567797000  |
| Sc | 0.802530000  | 0.029776000  | 0.247714000  |
| Si | 3.085855000  | -2.462832000 | -1.756610000 |
| C  | 2.828980000  | -4.263633000 | -2.284608000 |
| H  | 1.846865000  | -4.427994000 | -2.739467000 |
| H  | 3.589801000  | -4.550103000 | -3.020255000 |
| H  | 2.920877000  | -4.939724000 | -1.427315000 |
| C  | 4.860999000  | -2.255926000 | -1.131173000 |
| H  | 5.114070000  | -2.942566000 | -0.318328000 |
| H  | 5.534061000  | -2.478184000 | -1.968636000 |
| H  | 5.073956000  | -1.232220000 | -0.804154000 |
| C  | 2.934755000  | -1.318975000 | -3.267656000 |
| H  | 1.975238000  | -1.382168000 | -3.790733000 |
| H  | 3.115707000  | -0.271626000 | -2.999746000 |
| H  | 3.709948000  | -1.606272000 | -3.988931000 |



|    |              |             |              |
|----|--------------|-------------|--------------|
| Cl | 0.272469000  | 0.771948000 | -2.291693000 |
| Cl | 4.236641000  | 0.903678000 | 3.452573000  |
| H  | -0.744619000 | 5.438924000 | -3.149322000 |
| H  | 5.688031000  | 2.291406000 | -0.957640000 |

***oP2***<sub>syn</sub>,  $E_{(\text{SCF Done})} = -2748.808851$  a.u.

|   |              |              |              |
|---|--------------|--------------|--------------|
| N | -5.345346000 | -0.368208000 | 1.781207000  |
| C | -4.434268000 | 1.204539000  | -0.502738000 |
| H | -5.399312000 | 1.609481000  | -0.180294000 |
| H | -4.293979000 | 1.555464000  | -1.532738000 |
| C | -4.457005000 | -0.308475000 | -0.502411000 |
| C | -4.860957000 | -1.056686000 | 0.630241000  |
| C | -4.771092000 | -2.454505000 | 0.592420000  |
| H | -5.081810000 | -3.033809000 | 1.456828000  |
| C | -4.319955000 | -3.121912000 | -0.546014000 |
| H | -4.279408000 | -4.208307000 | -0.552892000 |
| C | -3.963119000 | -2.394647000 | -1.677626000 |
| H | -3.643487000 | -2.902418000 | -2.583937000 |
| C | -4.035508000 | -1.001551000 | -1.641484000 |
| H | -3.760050000 | -0.429563000 | -2.525925000 |
| C | -5.111796000 | -1.017338000 | 3.060593000  |
| H | -5.760779000 | -1.891999000 | 3.244787000  |
| H | -5.304875000 | -0.294601000 | 3.861347000  |
| H | -4.068448000 | -1.339101000 | 3.132428000  |
| C | -6.739251000 | 0.059297000  | 1.668028000  |
| H | -6.922889000 | 0.530897000  | 0.700266000  |
| H | -6.963762000 | 0.787443000  | 2.455525000  |
| H | -7.441770000 | -0.786272000 | 1.767268000  |
| C | 0.578446000  | -2.181195000 | 1.181524000  |
| C | 1.275800000  | -2.479885000 | -0.025342000 |
| C | 2.615036000  | -1.961576000 | 0.070931000  |
| C | 2.730203000  | -1.373943000 | 1.380252000  |
| C | 1.479381000  | -1.510014000 | 2.058968000  |
| C | 0.716057000  | -3.339327000 | -1.125347000 |
| H | 1.147905000  | -3.116439000 | -2.105012000 |
| H | -0.372371000 | -3.252870000 | -1.206358000 |
| H | 0.930796000  | -4.394887000 | -0.913594000 |
| C | 3.978060000  | -0.825104000 | 2.014632000  |
| H | 3.749310000  | -0.224962000 | 2.898613000  |
| H | 4.565925000  | -0.206070000 | 1.333183000  |
| H | 4.624781000  | -1.648472000 | 2.344358000  |
| C | 1.200650000  | -1.174617000 | 3.493832000  |
| H | 1.448099000  | -2.031431000 | 4.134811000  |
| H | 0.145226000  | -0.940256000 | 3.661581000  |

|    |              |              |              |
|----|--------------|--------------|--------------|
| H  | 1.788075000  | -0.323921000 | 3.847244000  |
| C  | -0.825878000 | -2.591618000 | 1.515503000  |
| H  | -0.837882000 | -3.607683000 | 1.932678000  |
| H  | -1.273568000 | -1.932566000 | 2.265186000  |
| H  | -1.486422000 | -2.596509000 | 0.642936000  |
| C  | -0.941438000 | 1.237646000  | -2.369657000 |
| C  | -1.590017000 | 2.003759000  | -1.398298000 |
| C  | -1.947744000 | 3.298419000  | -1.818734000 |
| C  | -1.696006000 | 3.764270000  | -3.104034000 |
| C  | -1.064201000 | 2.944534000  | -4.039617000 |
| C  | -0.674252000 | 1.662305000  | -3.669460000 |
| H  | -2.447379000 | 3.952622000  | -1.109972000 |
| H  | -1.999213000 | 4.770320000  | -3.378770000 |
| H  | -0.176936000 | 1.001357000  | -4.372136000 |
| C  | -1.891704000 | 1.549076000  | 0.020854000  |
| C  | -3.361555000 | 1.820075000  | 0.410403000  |
| H  | -1.755061000 | 0.460474000  | 0.082941000  |
| H  | -3.525279000 | 2.904700000  | 0.471070000  |
| H  | -3.515834000 | 1.431750000  | 1.423003000  |
| C  | 2.770673000  | 2.486716000  | 1.808112000  |
| C  | 1.646672000  | 2.192842000  | 0.986951000  |
| C  | 1.887314000  | 2.299737000  | -0.416633000 |
| C  | 3.123603000  | 2.682848000  | -0.955643000 |
| C  | 4.186765000  | 2.955089000  | -0.105289000 |
| C  | 3.998067000  | 2.866751000  | 1.278046000  |
| H  | 1.027444000  | 2.227833000  | -1.091092000 |
| H  | 3.233334000  | 2.788215000  | -2.031368000 |
| H  | 4.810406000  | 3.110756000  | 1.955931000  |
| C  | 0.398015000  | 1.589323000  | 1.450619000  |
| C  | -0.951792000 | 2.236641000  | 1.060498000  |
| H  | 0.427609000  | 1.395004000  | 2.521313000  |
| H  | -1.528186000 | 2.304870000  | 1.990104000  |
| H  | -0.788862000 | 3.274492000  | 0.740065000  |
| Sc | 1.171497000  | -0.056665000 | 0.120214000  |
| Si | 3.958285000  | -2.210647000 | -1.275623000 |
| C  | 4.171851000  | -4.066419000 | -1.578702000 |
| H  | 3.266478000  | -4.541116000 | -1.968359000 |
| H  | 4.974217000  | -4.229808000 | -2.307893000 |
| H  | 4.452415000  | -4.580882000 | -0.652871000 |
| C  | 5.638153000  | -1.486252000 | -0.789981000 |
| H  | 6.032764000  | -1.915394000 | 0.135870000  |
| H  | 6.348995000  | -1.725038000 | -1.590757000 |
| H  | 5.618813000  | -0.395968000 | -0.687505000 |
| C  | 3.422153000  | -1.334986000 | -2.880135000 |

|    |              |              |              |
|----|--------------|--------------|--------------|
| H  | 2.468930000  | -1.697900000 | -3.278714000 |
| H  | 3.344189000  | -0.248883000 | -2.738780000 |
| H  | 4.181847000  | -1.500902000 | -3.653766000 |
| Cl | 2.609416000  | 2.470221000  | 3.540447000  |
| Cl | -0.369115000 | -0.410725000 | -1.971862000 |
| H  | 5.151753000  | 3.258486000  | -0.499374000 |
| H  | -0.873055000 | 3.296030000  | -5.048981000 |

***oC2***<sub>iso</sub>,  $E_{(\text{SCF Done})} = -2748.793232$  a.u.

|    |              |              |              |
|----|--------------|--------------|--------------|
| Sc | 0.989120000  | 0.105533000  | 0.234051000  |
| C  | -1.895708000 | -2.735320000 | 0.805775000  |
| C  | 1.798431000  | 0.326903000  | 3.674612000  |
| C  | 2.085866000  | 0.837704000  | 2.293795000  |
| C  | 1.470983000  | 1.987400000  | 1.707678000  |
| C  | 2.120739000  | 2.249983000  | 0.467351000  |
| C  | 3.115245000  | 1.232823000  | 0.241838000  |
| C  | 3.106957000  | 0.390026000  | 1.408182000  |
| C  | 0.424734000  | 2.830612000  | 2.380317000  |
| C  | 1.963593000  | 3.509387000  | -0.336853000 |
| C  | 4.096218000  | -0.686445000 | 1.739876000  |
| C  | -1.053831000 | -1.484552000 | 1.161110000  |
| C  | 0.433114000  | -1.767207000 | 1.303675000  |
| H  | -1.436812000 | -3.208948000 | -0.063709000 |
| H  | -1.787644000 | -3.442043000 | 1.637201000  |
| H  | 0.734385000  | 0.394926000  | 3.925793000  |
| H  | 2.340722000  | 0.921981000  | 4.421657000  |
| H  | 2.104758000  | -0.714057000 | 3.804406000  |
| H  | -0.332691000 | 2.224797000  | 2.890811000  |
| H  | -0.094885000 | 3.490434000  | 1.680927000  |
| H  | 0.884719000  | 3.469067000  | 3.146154000  |
| H  | 1.058158000  | 4.061282000  | -0.074075000 |
| H  | 1.961258000  | 3.339250000  | -1.418183000 |
| H  | 2.804747000  | 4.181228000  | -0.125788000 |
| H  | 4.351252000  | -1.311304000 | 0.882542000  |
| H  | 3.734001000  | -1.342137000 | 2.533722000  |
| H  | 5.027949000  | -0.229866000 | 2.099507000  |
| H  | -1.422204000 | -1.042017000 | 2.094324000  |
| H  | -1.282367000 | -0.722200000 | 0.380343000  |
| H  | 0.739323000  | -2.066233000 | 2.301162000  |
| C  | 0.843750000  | -2.036065000 | -1.131731000 |
| C  | 1.139395000  | -2.405968000 | 0.217541000  |
| C  | 2.268235000  | -3.261713000 | 0.380200000  |
| C  | 3.043123000  | -3.669336000 | -0.692435000 |
| C  | 2.747817000  | -3.246155000 | -1.998035000 |

|    |               |               |               |
|----|---------------|---------------|---------------|
| C  | 1. 636740000  | -2. 450106000 | -2. 217124000 |
| H  | -0. 142749000 | -1. 622805000 | -1. 353467000 |
| C  | -2. 722414000 | 3. 851748000  | -0. 115356000 |
| C  | -2. 385806000 | 2. 515485000  | -0. 431863000 |
| C  | -3. 331797000 | 1. 522631000  | -0. 107524000 |
| C  | -4. 535627000 | 1. 831667000  | 0. 506561000  |
| C  | -4. 835164000 | 3. 161414000  | 0. 809418000  |
| C  | -3. 931771000 | 4. 172307000  | 0. 494681000  |
| H  | -3. 119180000 | 0. 483864000  | -0. 340007000 |
| H  | -4. 159357000 | 5. 209795000  | 0. 715700000  |
| C  | -1. 120867000 | 2. 193849000  | -1. 080600000 |
| C  | -0. 720423000 | 1. 001192000  | -1. 596095000 |
| H  | -0. 437985000 | 3. 030120000  | -1. 192740000 |
| H  | 0. 184796000  | 0. 977072000  | -2. 208287000 |
| H  | -1. 390592000 | 0. 148082000  | -1. 684453000 |
| Si | 4. 348356000  | 1. 254619000  | -1. 229243000 |
| C  | 5. 534592000  | -0. 219179000 | -1. 234337000 |
| H  | 6. 177018000  | -0. 250940000 | -0. 349300000 |
| H  | 5. 015523000  | -1. 179128000 | -1. 324959000 |
| H  | 6. 187699000  | -0. 115761000 | -2. 109807000 |
| C  | 5. 378328000  | 2. 841551000  | -1. 133482000 |
| H  | 6. 169456000  | 2. 808232000  | -1. 892036000 |
| H  | 4. 788993000  | 3. 745899000  | -1. 312406000 |
| H  | 5. 859970000  | 2. 937089000  | -0. 154012000 |
| C  | 3. 391777000  | 1. 191517000  | -2. 874004000 |
| H  | 4. 103995000  | 1. 222971000  | -3. 707550000 |
| H  | 2. 830918000  | 0. 253052000  | -2. 967928000 |
| H  | 2. 699860000  | 2. 028939000  | -3. 013946000 |
| H  | 3. 875428000  | -4. 343610000 | -0. 513994000 |
| C  | -3. 359056000 | -2. 445391000 | 0. 575833000  |
| C  | -3. 890438000 | -2. 163481000 | -0. 705079000 |
| C  | -4. 217704000 | -2. 415704000 | 1. 679730000  |
| C  | -5. 250142000 | -1. 843654000 | -0. 821221000 |
| C  | -5. 568830000 | -2. 099240000 | 1. 556174000  |
| H  | -3. 811365000 | -2. 650235000 | 2. 662041000  |
| C  | -6. 083044000 | -1. 805522000 | 0. 296550000  |
| H  | -5. 675020000 | -1. 638698000 | -1. 798701000 |
| H  | -6. 211004000 | -2. 091161000 | 2. 432368000  |
| H  | -7. 136740000 | -1. 569140000 | 0. 172611000  |
| N  | -3. 029748000 | -2. 211361000 | -1. 852540000 |
| C  | -3. 462711000 | -1. 406001000 | -2. 990145000 |
| H  | -2. 644688000 | -1. 356637000 | -3. 717549000 |
| H  | -4. 339497000 | -1. 820850000 | -3. 515692000 |
| H  | -3. 705379000 | -0. 388226000 | -2. 669834000 |

|    |              |              |              |
|----|--------------|--------------|--------------|
| C  | -2.771945000 | -3.584455000 | -2.306330000 |
| H  | -3.662611000 | -4.030557000 | -2.778936000 |
| H  | -1.957962000 | -3.580554000 | -3.039635000 |
| H  | -2.482816000 | -4.224502000 | -1.470979000 |
| H  | -5.235109000 | 1.036530000  | 0.743446000  |
| H  | 1.345004000  | -2.178017000 | -3.228005000 |
| Cl | -1.651239000 | 5.173588000  | -0.498796000 |
| Cl | 2.632757000  | -3.909837000 | 1.953411000  |
| H  | -5.776268000 | 3.417112000  | 1.287896000  |
| H  | 3.364768000  | -3.583411000 | -2.825061000 |

***o*TS2<sup>b</sup><sub>iso</sub>,  $E_{(\text{SCF Done})} = -2748.765699$  a.u.  $\text{IF} = i168.99$  cm<sup>-1</sup>**

|    |              |              |              |
|----|--------------|--------------|--------------|
| Sc | 1.087449000  | -0.175887000 | 0.341414000  |
| C  | -3.289549000 | -1.154406000 | -0.725013000 |
| C  | 2.390033000  | -1.067886000 | 3.491972000  |
| C  | 2.720280000  | -0.617094000 | 2.096549000  |
| C  | 2.922597000  | 0.743238000  | 1.699703000  |
| C  | 3.350025000  | 0.748372000  | 0.344668000  |
| C  | 3.395687000  | -0.614269000 | -0.131254000 |
| C  | 3.041802000  | -1.450573000 | 0.986152000  |
| C  | 2.862909000  | 1.930338000  | 2.615372000  |
| C  | 3.856176000  | 1.964443000  | -0.370978000 |
| C  | 3.106030000  | -2.948996000 | 1.048183000  |
| C  | -2.557185000 | -0.777352000 | 0.572699000  |
| C  | -1.027339000 | -0.827889000 | 0.517199000  |
| H  | -2.892182000 | -0.574557000 | -1.562491000 |
| H  | -3.106772000 | -2.210978000 | -0.955757000 |
| H  | 1.748282000  | -0.352168000 | 4.016399000  |
| H  | 3.308058000  | -1.165303000 | 4.086625000  |
| H  | 1.887460000  | -2.038433000 | 3.512153000  |
| H  | 2.113882000  | 1.811201000  | 3.403983000  |
| H  | 2.636938000  | 2.856510000  | 2.081629000  |
| H  | 3.833162000  | 2.064881000  | 3.112552000  |
| H  | 3.370318000  | 2.876394000  | -0.018325000 |
| H  | 3.716910000  | 1.912708000  | -1.453403000 |
| H  | 4.931909000  | 2.082777000  | -0.186284000 |
| H  | 2.748897000  | -3.426797000 | 0.134298000  |
| H  | 2.524798000  | -3.344375000 | 1.885290000  |
| H  | 4.144483000  | -3.271620000 | 1.199240000  |
| H  | -2.903886000 | -1.451037000 | 1.368427000  |
| H  | -2.867213000 | 0.230392000  | 0.874367000  |
| H  | -0.692127000 | -0.609078000 | 1.567914000  |
| C  | -0.124669000 | -2.418130000 | -1.242265000 |
| C  | -0.475246000 | -2.176004000 | 0.102019000  |

|    |              |              |              |
|----|--------------|--------------|--------------|
| C  | -0.397473000 | -3.283442000 | 0.981307000  |
| C  | -0.033578000 | -4.550703000 | 0.535948000  |
| C  | 0.292520000  | -4.748565000 | -0.805328000 |
| C  | 0.258107000  | -3.679634000 | -1.696807000 |
| H  | -0.215731000 | -1.608210000 | -1.962433000 |
| C  | 0.896847000  | 4.156093000  | -0.073122000 |
| C  | 0.317270000  | 2.901905000  | 0.203978000  |
| C  | -0.344701000 | 2.774319000  | 1.440816000  |
| C  | -0.397882000 | 3.813952000  | 2.364209000  |
| C  | 0.218714000  | 5.028914000  | 2.073258000  |
| C  | 0.858425000  | 5.201019000  | 0.847311000  |
| H  | -0.852271000 | 1.838661000  | 1.675182000  |
| H  | 1.311136000  | 6.152740000  | 0.587636000  |
| C  | 0.340629000  | 1.783973000  | -0.758851000 |
| C  | -0.782540000 | 0.966655000  | -0.912174000 |
| H  | 1.057184000  | 1.836598000  | -1.577351000 |
| H  | -0.860329000 | 0.372825000  | -1.819510000 |
| H  | -1.742646000 | 1.254781000  | -0.494009000 |
| Si | 4.097251000  | -1.103565000 | -1.850774000 |
| C  | 4.209196000  | -2.977406000 | -2.100399000 |
| H  | 4.850947000  | -3.459459000 | -1.356358000 |
| H  | 3.233795000  | -3.473919000 | -2.090165000 |
| H  | 4.658880000  | -3.156176000 | -3.084918000 |
| C  | 5.845211000  | -0.396925000 | -2.015122000 |
| H  | 6.291219000  | -0.744335000 | -2.954717000 |
| H  | 5.865681000  | 0.696428000  | -2.022450000 |
| H  | 6.484096000  | -0.743745000 | -1.195278000 |
| C  | 2.975033000  | -0.409458000 | -3.223241000 |
| H  | 3.401794000  | -0.653339000 | -4.203682000 |
| H  | 1.973762000  | -0.858140000 | -3.192185000 |
| H  | 2.864689000  | 0.679506000  | -3.182318000 |
| H  | -0.011894000 | -5.378176000 | 1.238089000  |
| C  | -4.775570000 | -0.926151000 | -0.577428000 |
| C  | -5.326096000 | 0.370220000  | -0.657613000 |
| C  | -5.617851000 | -2.000820000 | -0.281488000 |
| C  | -6.692779000 | 0.548867000  | -0.418557000 |
| C  | -6.978991000 | -1.816332000 | -0.046750000 |
| H  | -5.194212000 | -3.001820000 | -0.222553000 |
| C  | -7.514472000 | -0.533361000 | -0.107670000 |
| H  | -7.125159000 | 1.543232000  | -0.481168000 |
| H  | -7.612525000 | -2.667575000 | 0.186230000  |
| H  | -8.573341000 | -0.370883000 | 0.075009000  |
| N  | -4.460194000 | 1.467648000  | -0.987802000 |
| C  | -4.790853000 | 2.731433000  | -0.340601000 |

|    |              |              |              |
|----|--------------|--------------|--------------|
| H  | -3.956432000 | 3.428811000  | -0.478351000 |
| H  | -5.694698000 | 3.217789000  | -0.746059000 |
| H  | -4.936421000 | 2.572443000  | 0.731834000  |
| C  | -4.323672000 | 1.649682000  | -2.433015000 |
| H  | -5.253884000 | 2.014948000  | -2.901113000 |
| H  | -3.529697000 | 2.377861000  | -2.637533000 |
| H  | -4.060655000 | 0.702568000  | -2.913340000 |
| H  | -0.921674000 | 3.675392000  | 3.305700000  |
| H  | 0.499451000  | -3.827612000 | -2.744971000 |
| H  | 0.569546000  | -5.741574000 | -1.147249000 |
| H  | 0.188385000  | 5.849134000  | 2.784156000  |
| Cl | 1.608078000  | 4.475099000  | -1.636534000 |
| Cl | -0.821653000 | -3.103184000 | 2.659535000  |

***oP2***<sub>iso</sub>,  $E_{(\text{SCF Done})} = -2748.806754$  a.u.

|    |              |              |              |
|----|--------------|--------------|--------------|
| Sc | 1.809379000  | 0.015899000  | 0.420969000  |
| C  | -3.635338000 | -0.712465000 | 0.010470000  |
| C  | 4.932598000  | 0.408263000  | 2.014679000  |
| C  | 4.222031000  | -0.186767000 | 0.831920000  |
| C  | 4.077848000  | 0.436012000  | -0.444896000 |
| C  | 3.414879000  | -0.477862000 | -1.309923000 |
| C  | 3.158185000  | -1.699580000 | -0.582005000 |
| C  | 3.689350000  | -1.503030000 | 0.742739000  |
| C  | 4.687752000  | 1.749606000  | -0.828266000 |
| C  | 3.186028000  | -0.241371000 | -2.776190000 |
| C  | 3.800474000  | -2.509620000 | 1.853165000  |
| C  | -3.170123000 | 0.640371000  | 0.568440000  |
| C  | -1.637124000 | 0.886433000  | 0.593730000  |
| H  | -3.270358000 | -0.833361000 | -1.014194000 |
| H  | -3.207446000 | -1.531607000 | 0.604189000  |
| H  | 4.849523000  | 1.499490000  | 2.035567000  |
| H  | 6.003945000  | 0.169072000  | 1.980257000  |
| H  | 4.554970000  | 0.024257000  | 2.968591000  |
| H  | 4.568676000  | 2.509580000  | -0.050222000 |
| H  | 4.267050000  | 2.145794000  | -1.755069000 |
| H  | 5.766250000  | 1.619219000  | -0.990387000 |
| H  | 2.973465000  | 0.808966000  | -2.993642000 |
| H  | 2.352009000  | -0.830459000 | -3.166268000 |
| H  | 4.079786000  | -0.515703000 | -3.351132000 |
| H  | 3.069486000  | -3.313679000 | 1.768624000  |
| H  | 3.688655000  | -2.049276000 | 2.841328000  |
| H  | 4.794863000  | -2.975528000 | 1.837972000  |
| H  | -3.562139000 | 0.760027000  | 1.585401000  |
| H  | -3.618717000 | 1.435285000  | -0.038300000 |

|    |               |               |               |
|----|---------------|---------------|---------------|
| H  | -1. 510037000 | 1. 873674000  | 1. 055791000  |
| C  | -0. 349826000 | -1. 282505000 | 0. 948106000  |
| C  | -0. 929456000 | -0. 111789000 | 1. 485043000  |
| C  | -0. 810191000 | 0. 054329000  | 2. 880428000  |
| C  | -0. 128253000 | -0. 867328000 | 3. 682534000  |
| C  | 0. 443890000  | -2. 003201000 | 3. 116200000  |
| C  | 0. 322761000  | -2. 219629000 | 1. 741344000  |
| H  | -0. 477932000 | -1. 481997000 | -0. 115059000 |
| C  | 1. 746724000  | 3. 409644000  | -1. 050600000 |
| C  | 1. 115900000  | 2. 357968000  | -0. 332225000 |
| C  | 1. 282981000  | 2. 421748000  | 1. 081134000  |
| C  | 1. 989954000  | 3. 446472000  | 1. 728206000  |
| C  | 2. 570067000  | 4. 454658000  | 0. 975109000  |
| C  | 2. 433370000  | 4. 436561000  | -0. 417935000 |
| H  | 0. 692157000  | 1. 755453000  | 1. 717454000  |
| H  | 2. 860681000  | 5. 234126000  | -1. 018066000 |
| C  | 0. 487914000  | 1. 178108000  | -0. 954743000 |
| C  | -1. 035090000 | 0. 958190000  | -0. 817740000 |
| H  | 0. 731876000  | 1. 142181000  | -2. 018426000 |
| H  | -1. 279343000 | 0. 047231000  | -1. 378142000 |
| H  | -1. 569382000 | 1. 763448000  | -1. 342487000 |
| Si | 2. 630475000  | -3. 329955000 | -1. 453136000 |
| C  | 2. 708812000  | -4. 848188000 | -0. 317130000 |
| H  | 3. 704219000  | -4. 994111000 | 0. 114123000  |
| H  | 1. 975790000  | -4. 851255000 | 0. 497060000  |
| H  | 2. 492657000  | -5. 726351000 | -0. 938349000 |
| C  | 3. 854921000  | -3. 648295000 | -2. 862744000 |
| H  | 3. 658355000  | -4. 636868000 | -3. 294745000 |
| H  | 3. 783455000  | -2. 914423000 | -3. 670479000 |
| H  | 4. 885926000  | -3. 645925000 | -2. 491625000 |
| C  | 0. 860653000  | -3. 224601000 | -2. 143443000 |
| H  | 0. 705434000  | -4. 046325000 | -2. 853071000 |
| H  | 0. 106794000  | -3. 343291000 | -1. 355888000 |
| H  | 0. 656079000  | -2. 291222000 | -2. 678974000 |
| H  | -0. 059190000 | -0. 688980000 | 4. 751292000  |
| C  | -5. 143055000 | -0. 824112000 | 0. 051734000  |
| C  | -5. 954634000 | -0. 182857000 | -0. 907900000 |
| C  | -5. 757324000 | -1. 510897000 | 1. 102180000  |
| C  | -7. 346249000 | -0. 230372000 | -0. 768112000 |
| C  | -7. 143989000 | -1. 557498000 | 1. 233694000  |
| H  | -5. 132429000 | -2. 008598000 | 1. 842128000  |
| C  | -7. 939967000 | -0. 904882000 | 0. 297364000  |
| H  | -7. 976092000 | 0. 262031000  | -1. 503451000 |
| H  | -7. 595782000 | -2. 093715000 | 2. 063724000  |



|    |              |              |              |
|----|--------------|--------------|--------------|
| H  | -9.022995000 | -0.927087000 | 0.385619000  |
| N  | -5.322604000 | 0.503057000  | -1.994244000 |
| C  | -5.998482000 | 1.708002000  | -2.450993000 |
| H  | -5.318569000 | 2.268680000  | -3.103197000 |
| H  | -6.920535000 | 1.514683000  | -3.027689000 |
| H  | -6.252812000 | 2.338845000  | -1.594394000 |
| C  | -5.011506000 | -0.377277000 | -3.116991000 |
| H  | -5.914729000 | -0.704187000 | -3.662194000 |
| H  | -4.357737000 | 0.147525000  | -3.823986000 |
| H  | -4.493379000 | -1.274720000 | -2.766335000 |
| H  | 2.044301000  | 3.462187000  | 2.813017000  |
| H  | 0.719228000  | -3.121242000 | 1.286914000  |
| H  | 0.959551000  | -2.720839000 | 3.746744000  |
| H  | 3.108991000  | 5.266978000  | 1.453135000  |
| Cl | 1.609989000  | 3.480601000  | -2.784949000 |
| Cl | -1.495804000 | 1.443084000  | 3.665642000  |

**mC1St**,  $E_{(\text{SCF Done})} = -769.0726812$  a.u.

|    |              |              |              |
|----|--------------|--------------|--------------|
| C  | 0.073204000  | -0.782110000 | 0.000025000  |
| C  | -1.189908000 | -0.172172000 | 0.000061000  |
| C  | -1.251791000 | 1.230910000  | 0.000069000  |
| C  | -0.089295000 | 1.991046000  | 0.000027000  |
| C  | 1.166659000  | 1.382106000  | -0.000018000 |
| C  | 1.227902000  | -0.007235000 | -0.000017000 |
| H  | 0.153509000  | -1.865292000 | 0.000024000  |
| H  | -2.214958000 | 1.732316000  | 0.000122000  |
| H  | 2.077010000  | 1.972279000  | -0.000048000 |
| C  | -2.380382000 | -1.033572000 | 0.000093000  |
| C  | -3.661402000 | -0.648437000 | -0.000070000 |
| H  | -2.166516000 | -2.102512000 | 0.000255000  |
| H  | -4.461719000 | -1.382348000 | -0.000027000 |
| H  | -3.967025000 | 0.394689000  | -0.000261000 |
| Cl | 2.786089000  | -0.799337000 | -0.000066000 |
| H  | -0.153720000 | 3.076379000  | 0.000036000  |

**mC1<sup>a</sup>**,  $E_{(\text{SCF Done})} = -2255.828384$  a.u.

|    |              |              |              |
|----|--------------|--------------|--------------|
| Sc | -0.633001000 | -0.105347000 | -0.247083000 |
| Si | -0.812727000 | 3.640944000  | -0.140604000 |
| C  | -1.254612000 | 1.873338000  | 0.403985000  |
| C  | -0.967024000 | 3.883862000  | -2.019421000 |
| C  | 0.962171000  | 4.068244000  | 0.406526000  |
| C  | -1.977451000 | 4.876170000  | 0.710142000  |
| C  | -1.218537000 | -1.032892000 | -3.693019000 |
| C  | -1.624947000 | -1.212684000 | -2.257180000 |

|   |              |              |              |
|---|--------------|--------------|--------------|
| C | -2.639555000 | -0.473874000 | -1.583356000 |
| C | -2.845633000 | -1.055818000 | -0.284585000 |
| C | -1.952733000 | -2.183107000 | -0.196322000 |
| C | -1.201612000 | -2.273224000 | -1.397181000 |
| C | -3.413365000 | 0.649692000  | -2.212371000 |
| C | -1.924920000 | -3.207357000 | 0.903500000  |
| C | -0.253508000 | -3.379924000 | -1.763650000 |
| C | 1.239015000  | 0.777751000  | -1.796120000 |
| C | 2.064272000  | -0.280608000 | -1.975474000 |
| H | -2.356003000 | 1.833871000  | 0.422811000  |
| H | -0.963151000 | 1.853241000  | 1.473887000  |
| H | -0.252188000 | 3.277463000  | -2.587996000 |
| H | -0.780417000 | 4.932626000  | -2.278952000 |
| H | -1.976096000 | 3.636169000  | -2.368371000 |
| H | 1.081943000  | 3.932877000  | 1.488599000  |
| H | 1.175144000  | 5.120905000  | 0.186481000  |
| H | 1.738882000  | 3.477793000  | -0.094973000 |
| H | -3.020849000 | 4.702049000  | 0.421913000  |
| H | -1.725817000 | 5.908582000  | 0.439769000  |
| H | -1.914471000 | 4.791297000  | 1.801416000  |
| H | -1.264238000 | 0.011437000  | -4.018498000 |
| H | -1.894183000 | -1.594865000 | -4.351272000 |
| H | -0.208226000 | -1.402680000 | -3.896111000 |
| H | -2.855281000 | 1.121201000  | -3.026734000 |
| H | -3.675785000 | 1.431108000  | -1.497664000 |
| H | -4.349442000 | 0.273504000  | -2.645774000 |
| H | -2.733078000 | -3.936057000 | 0.761626000  |
| H | -2.061239000 | -2.768785000 | 1.896308000  |
| H | -0.992561000 | -3.780542000 | 0.911076000  |
| H | 0.337610000  | -3.731511000 | -0.910849000 |
| H | 0.445059000  | -3.084209000 | -2.552872000 |
| H | -0.805701000 | -4.249283000 | -2.144604000 |
| H | 1.503212000  | 1.638012000  | -1.186330000 |
| H | 0.369565000  | 0.894291000  | -2.445070000 |
| H | 1.746513000  | -1.051464000 | -2.676837000 |
| C | 1.481020000  | -1.884835000 | 1.518325000  |
| O | 0.590613000  | -0.723617000 | 1.456657000  |
| C | 0.589494000  | -0.036422000 | 2.759619000  |
| C | 1.368785000  | -0.949874000 | 3.692270000  |
| C | 2.345304000  | -1.646915000 | 2.742974000  |
| H | 0.858314000  | -2.777470000 | 1.624932000  |
| H | 2.036435000  | -1.926286000 | 0.579425000  |
| H | 1.078424000  | 0.930807000  | 2.614457000  |
| H | -0.449911000 | 0.115285000  | 3.054624000  |

|    |              |              |              |
|----|--------------|--------------|--------------|
| H  | 1.869079000  | -0.384068000 | 4.482640000  |
| H  | 0.702267000  | -1.679371000 | 4.165431000  |
| H  | 3.188917000  | -0.992521000 | 2.498822000  |
| H  | 2.741804000  | -2.582156000 | 3.147476000  |
| C  | 3.971408000  | 0.402085000  | -0.486470000 |
| C  | 3.374726000  | -0.514216000 | -1.371106000 |
| C  | 4.073037000  | -1.683757000 | -1.716426000 |
| C  | 5.337683000  | -1.933765000 | -1.190640000 |
| C  | 5.924675000  | -1.028590000 | -0.310496000 |
| C  | 5.230355000  | 0.135333000  | 0.035533000  |
| H  | 3.473046000  | 1.327358000  | -0.216677000 |
| H  | 3.627191000  | -2.390114000 | -2.412348000 |
| H  | 5.875296000  | -2.834653000 | -1.471061000 |
| Si | -4.231286000 | -0.678429000 | 0.987857000  |
| C  | -5.352137000 | -2.204505000 | 1.090298000  |
| H  | -4.849401000 | -3.073927000 | 1.525737000  |
| H  | -6.221107000 | -1.977548000 | 1.719512000  |
| H  | -5.723642000 | -2.487821000 | 0.099245000  |
| C  | -5.316564000 | 0.794314000  | 0.501015000  |
| H  | -5.818586000 | 0.643078000  | -0.459615000 |
| H  | -6.097653000 | 0.891786000  | 1.265348000  |
| H  | -4.778719000 | 1.747054000  | 0.464222000  |
| C  | -3.508447000 | -0.306529000 | 2.707584000  |
| H  | -4.330855000 | -0.141574000 | 3.414168000  |
| H  | -2.901178000 | -1.125647000 | 3.108444000  |
| H  | -2.903948000 | 0.608041000  | 2.691924000  |
| Cl | 5.956581000  | 1.269329000  | 1.132197000  |
| H  | 6.912029000  | -1.211215000 | 0.101186000  |

***m*TS1<sup>a</sup>,  $E_{(\text{SCF Done})} = -2255.817303$  a.u. IF = *i*430.23 cm<sup>-1</sup>**

|    |              |              |              |
|----|--------------|--------------|--------------|
| Sc | -0.340754000 | -0.439852000 | -0.324517000 |
| Si | -0.453321000 | 3.810164000  | -0.201889000 |
| C  | -0.563611000 | 1.919966000  | -0.133670000 |
| C  | -0.971878000 | 4.464220000  | -1.909380000 |
| C  | 1.303691000  | 4.408928000  | 0.214680000  |
| C  | -1.633264000 | 4.550016000  | 1.095579000  |
| C  | -1.030618000 | -2.412744000 | -3.297755000 |
| C  | -1.486245000 | -2.045006000 | -1.916240000 |
| C  | -2.402693000 | -1.020244000 | -1.571604000 |
| C  | -2.667674000 | -1.087418000 | -0.155045000 |
| C  | -1.881202000 | -2.193953000 | 0.345438000  |
| C  | -1.150514000 | -2.766696000 | -0.734134000 |
| C  | -3.029666000 | -0.080686000 | -2.564684000 |
| C  | -1.928689000 | -2.765784000 | 1.736450000  |

|   |              |              |              |
|---|--------------|--------------|--------------|
| C | -0.319622000 | -4.017997000 | -0.697320000 |
| C | 0.590614000  | 1.390856000  | -1.798388000 |
| C | 1.169520000  | 0.101516000  | -2.025064000 |
| H | -1.635853000 | 1.669708000  | -0.184089000 |
| H | -0.203191000 | 1.644594000  | 0.880147000  |
| H | -0.259646000 | 4.183771000  | -2.692547000 |
| H | -1.035956000 | 5.558694000  | -1.893460000 |
| H | -1.957858000 | 4.078828000  | -2.195514000 |
| H | 1.632848000  | 4.015040000  | 1.183888000  |
| H | 1.323055000  | 5.503400000  | 0.280916000  |
| H | 2.044857000  | 4.113364000  | -0.536050000 |
| H | -2.672020000 | 4.256292000  | 0.904851000  |
| H | -1.588050000 | 5.646290000  | 1.083407000  |
| H | -1.373007000 | 4.217160000  | 2.107479000  |
| H | -1.024641000 | -1.556097000 | -3.980831000 |
| H | -1.693934000 | -3.168648000 | -3.741995000 |
| H | -0.020515000 | -2.837497000 | -3.293734000 |
| H | -2.436319000 | -0.015590000 | -3.483046000 |
| H | -3.137228000 | 0.934511000  | -2.172584000 |
| H | -4.033095000 | -0.418704000 | -2.859403000 |
| H | -2.707322000 | -3.537037000 | 1.827225000  |
| H | -2.144990000 | -2.006165000 | 2.494172000  |
| H | -0.983301000 | -3.243993000 | 2.018975000  |
| H | -0.014277000 | -4.276826000 | 0.321843000  |
| H | 0.592206000  | -3.928864000 | -1.299095000 |
| H | -0.881120000 | -4.881115000 | -1.084837000 |
| H | 1.279203000  | 2.199923000  | -1.567811000 |
| H | -0.172341000 | 1.695562000  | -2.511574000 |
| H | 0.746223000  | -0.498105000 | -2.828030000 |
| C | 1.947874000  | -1.893211000 | 1.562903000  |
| O | 0.964885000  | -0.822150000 | 1.492043000  |
| C | 0.897420000  | -0.124877000 | 2.760743000  |
| C | 1.674061000  | -0.991744000 | 3.742218000  |
| C | 2.733808000  | -1.625323000 | 2.837148000  |
| H | 1.402157000  | -2.841900000 | 1.610808000  |
| H | 2.543419000  | -1.858578000 | 0.649990000  |
| H | 1.365600000  | 0.858258000  | 2.633479000  |
| H | -0.156014000 | 0.006803000  | 3.023207000  |
| H | 2.097784000  | -0.403096000 | 4.561055000  |
| H | 1.022806000  | -1.761307000 | 4.173036000  |
| H | 3.548850000  | -0.920335000 | 2.641429000  |
| H | 3.163516000  | -2.540905000 | 3.254181000  |
| C | 3.248681000  | 0.504604000  | -0.664209000 |
| C | 2.495239000  | -0.277318000 | -1.575088000 |

|    |              |              |              |
|----|--------------|--------------|--------------|
| C  | 3.109194000  | -1.465079000 | -2.049692000 |
| C  | 4.376777000  | -1.845968000 | -1.639229000 |
| C  | 5.110276000  | -1.075027000 | -0.726842000 |
| C  | 4.515278000  | 0.093643000  | -0.263480000 |
| H  | 2.847672000  | 1.433095000  | -0.270584000 |
| H  | 2.567170000  | -2.081134000 | -2.763927000 |
| H  | 4.817059000  | -2.758046000 | -2.036437000 |
| Si | -4.015955000 | -0.217158000 | 0.842304000  |
| C  | -5.345749000 | -1.482264000 | 1.345312000  |
| H  | -4.935449000 | -2.275825000 | 1.979100000  |
| H  | -6.156842000 | -0.994691000 | 1.900100000  |
| H  | -5.780176000 | -1.956917000 | 0.457911000  |
| C  | -4.898936000 | 1.167128000  | -0.117942000 |
| H  | -5.383703000 | 0.801614000  | -1.028567000 |
| H  | -5.679539000 | 1.590570000  | 0.526661000  |
| H  | -4.224131000 | 1.984625000  | -0.395223000 |
| C  | -3.346809000 | 0.606097000  | 2.428551000  |
| H  | -4.162607000 | 1.125758000  | 2.946615000  |
| H  | -2.917453000 | -0.109993000 | 3.137790000  |
| H  | -2.581161000 | 1.353078000  | 2.187247000  |
| Cl | 5.398170000  | 1.097805000  | 0.880740000  |
| H  | 6.103429000  | -1.364042000 | -0.401579000 |

***mP1<sup>a</sup>***,  $E_{(\text{SCF Done})} = -2255.858856$  a.u.

|    |              |              |              |
|----|--------------|--------------|--------------|
| Sc | -0.136497000 | -0.562040000 | -0.376612000 |
| Si | -0.494488000 | 3.885440000  | -0.079477000 |
| C  | -0.168265000 | 1.990570000  | -0.389424000 |
| C  | -1.551428000 | 4.548004000  | -1.497717000 |
| C  | 1.180921000  | 4.756232000  | -0.005239000 |
| C  | -1.395448000 | 4.055608000  | 1.574232000  |
| C  | -0.944371000 | -2.245622000 | -3.432863000 |
| C  | -1.351446000 | -1.949400000 | -2.021067000 |
| C  | -2.224862000 | -0.917193000 | -1.589555000 |
| C  | -2.488962000 | -1.086116000 | -0.181050000 |
| C  | -1.763102000 | -2.260602000 | 0.227776000  |
| C  | -1.050405000 | -2.771971000 | -0.891071000 |
| C  | -2.804072000 | 0.117785000  | -2.512320000 |
| C  | -1.819279000 | -2.926880000 | 1.573277000  |
| C  | -0.238084000 | -4.035621000 | -0.938971000 |
| C  | 0.500755000  | 1.717373000  | -1.775687000 |
| C  | 0.947727000  | 0.279495000  | -2.063411000 |
| H  | -1.174042000 | 1.529326000  | -0.285485000 |
| H  | 0.459311000  | 1.687139000  | 0.470219000  |
| H  | -1.027793000 | 4.496051000  | -2.458208000 |

|   |              |              |              |
|---|--------------|--------------|--------------|
| H | -1.795874000 | 5.600896000  | -1.314911000 |
| H | -2.497786000 | 4.003659000  | -1.593180000 |
| H | 1.812337000  | 4.359702000  | 0.798300000  |
| H | 1.028570000  | 5.823240000  | 0.195652000  |
| H | 1.735574000  | 4.679069000  | -0.946510000 |
| H | -2.380351000 | 3.576004000  | 1.560164000  |
| H | -1.553180000 | 5.116240000  | 1.802524000  |
| H | -0.816375000 | 3.629126000  | 2.401832000  |
| H | -0.944965000 | -1.352849000 | -4.064553000 |
| H | -1.645222000 | -2.959580000 | -3.886074000 |
| H | 0.051201000  | -2.696987000 | -3.492128000 |
| H | -2.130042000 | 0.330587000  | -3.348057000 |
| H | -3.018147000 | 1.061411000  | -2.006693000 |
| H | -3.748450000 | -0.234395000 | -2.948121000 |
| H | -2.601418000 | -3.697020000 | 1.587263000  |
| H | -2.045944000 | -2.223327000 | 2.377928000  |
| H | -0.881167000 | -3.430791000 | 1.827557000  |
| H | 0.089737000  | -4.357211000 | 0.054108000  |
| H | 0.651896000  | -3.937369000 | -1.570307000 |
| H | -0.834317000 | -4.857538000 | -1.356958000 |
| H | 1.348151000  | 2.411956000  | -1.873561000 |
| H | -0.225561000 | 2.011256000  | -2.539828000 |
| H | 0.722308000  | -0.047320000 | -3.077463000 |
| C | 2.005809000  | -1.974854000 | 1.628435000  |
| O | 0.959695000  | -0.955824000 | 1.491858000  |
| C | 0.747331000  | -0.287650000 | 2.774354000  |
| C | 1.481652000  | -1.144163000 | 3.792934000  |
| C | 2.652983000  | -1.691227000 | 2.973060000  |
| H | 1.514465000  | -2.952914000 | 1.605749000  |
| H | 2.678946000  | -1.875375000 | 0.775134000  |
| H | 1.180239000  | 0.716315000  | 2.701594000  |
| H | -0.329860000 | -0.215263000 | 2.941538000  |
| H | 1.800898000  | -0.559038000 | 4.659500000  |
| H | 0.839632000  | -1.958434000 | 4.146714000  |
| H | 3.441545000  | -0.938501000 | 2.868066000  |
| H | 3.094401000  | -2.591969000 | 3.408070000  |
| C | 3.039777000  | 0.601017000  | -0.671388000 |
| C | 2.292277000  | -0.127416000 | -1.623471000 |
| C | 2.865179000  | -1.331306000 | -2.105297000 |
| C | 4.119215000  | -1.756456000 | -1.685273000 |
| C | 4.852653000  | -1.023685000 | -0.746784000 |
| C | 4.291310000  | 0.149912000  | -0.252523000 |
| H | 2.680500000  | 1.552043000  | -0.291298000 |
| H | 2.329096000  | -1.902273000 | -2.859566000 |

|    |              |              |              |
|----|--------------|--------------|--------------|
| H  | 4.546278000  | -2.665688000 | -2.100319000 |
| Si | -3.867848000 | -0.275178000 | 0.876809000  |
| C  | -5.186242000 | -1.597073000 | 1.191101000  |
| H  | -4.804065000 | -2.437892000 | 1.778920000  |
| H  | -6.029957000 | -1.163247000 | 1.740746000  |
| H  | -5.570660000 | -1.994293000 | 0.245175000  |
| C  | -4.695206000 | 1.194487000  | 0.012781000  |
| H  | -5.168861000 | 0.915907000  | -0.933237000 |
| H  | -5.486092000 | 1.566400000  | 0.675908000  |
| H  | -4.012775000 | 2.031031000  | -0.174680000 |
| C  | -3.215286000 | 0.378636000  | 2.541203000  |
| H  | -4.040986000 | 0.870309000  | 3.070211000  |
| H  | -2.840680000 | -0.409078000 | 3.203313000  |
| H  | -2.428095000 | 1.130710000  | 2.410780000  |
| Cl | 5.174539000  | 1.096546000  | 0.918202000  |
| H  | 5.835207000  | -1.346843000 | -0.420184000 |

**$mC2^a_{syn}$** ,  $E_{(SCF\ Done)} = -3024.926501$  a.u.

|    |              |              |              |
|----|--------------|--------------|--------------|
| Sc | 0.558676000  | -0.962532000 | 0.164337000  |
| Si | 1.473731000  | 4.534802000  | -1.872740000 |
| C  | 0.907431000  | 3.182318000  | -0.635633000 |
| C  | 1.881970000  | 3.739457000  | -3.549122000 |
| C  | 3.000528000  | 5.432741000  | -1.197392000 |
| C  | 0.040641000  | 5.757991000  | -2.078699000 |
| C  | 2.715859000  | -1.946019000 | -0.439942000 |
| C  | 1.834439000  | -2.215952000 | -1.539718000 |
| C  | 0.812687000  | -3.113032000 | -1.106437000 |
| C  | 1.039268000  | -3.404310000 | 0.267580000  |
| C  | 2.189976000  | -2.678555000 | 0.685115000  |
| C  | 2.019017000  | -1.743448000 | -2.956255000 |
| C  | -0.212706000 | -3.805469000 | -1.959429000 |
| C  | 0.267865000  | -4.416379000 | 1.063056000  |
| C  | 2.810689000  | -2.767807000 | 2.053105000  |
| C  | 1.937313000  | 2.082858000  | -0.361951000 |
| C  | 1.594488000  | 0.950947000  | 0.652657000  |
| H  | -0.034067000 | 2.770988000  | -1.028278000 |
| H  | 0.647412000  | 3.697627000  | 0.298461000  |
| H  | 2.715732000  | 3.031617000  | -3.472880000 |
| H  | 2.170937000  | 4.506496000  | -4.276922000 |
| H  | 1.016772000  | 3.206050000  | -3.961744000 |
| H  | 2.795449000  | 5.882775000  | -0.219141000 |
| H  | 3.301864000  | 6.238866000  | -1.876290000 |
| H  | 3.857476000  | 4.758738000  | -1.085661000 |
| H  | -0.855156000 | 5.266208000  | -2.475934000 |

|   |              |              |              |
|---|--------------|--------------|--------------|
| H | 0.312211000  | 6.561987000  | -2.772324000 |
| H | -0.226124000 | 6.221278000  | -1.121817000 |
| H | 2.352015000  | -0.703514000 | -3.006981000 |
| H | 1.100011000  | -1.830284000 | -3.544231000 |
| H | 2.776359000  | -2.347637000 | -3.472426000 |
| H | -0.244632000 | -3.401893000 | -2.975020000 |
| H | -1.227797000 | -3.756355000 | -1.546360000 |
| H | 0.035187000  | -4.870835000 | -2.053672000 |
| H | 0.663726000  | -5.424384000 | 0.879454000  |
| H | -0.792470000 | -4.441546000 | 0.789357000  |
| H | 0.332150000  | -4.246234000 | 2.141591000  |
| H | 2.147979000  | -3.263866000 | 2.768243000  |
| H | 3.068991000  | -1.786894000 | 2.464080000  |
| H | 3.737194000  | -3.355393000 | 2.022201000  |
| H | 2.854797000  | 2.577406000  | -0.006593000 |
| H | 2.221586000  | 1.611043000  | -1.313970000 |
| H | 2.562844000  | 0.498212000  | 0.912263000  |
| C | -0.962248000 | -1.421013000 | 3.036656000  |
| O | -1.064849000 | -1.392806000 | 1.571824000  |
| C | -2.403597000 | -1.820848000 | 1.164007000  |
| C | -3.055460000 | -2.362256000 | 2.426218000  |
| C | -2.397503000 | -1.518086000 | 3.519874000  |
| H | -0.375668000 | -2.304485000 | 3.308365000  |
| H | -0.441290000 | -0.515718000 | 3.346777000  |
| H | -2.928064000 | -0.942845000 | 0.777133000  |
| H | -2.293521000 | -2.558792000 | 0.365341000  |
| H | -4.142999000 | -2.254458000 | 2.395608000  |
| H | -2.819694000 | -3.423723000 | 2.560727000  |
| H | -2.851090000 | -0.522617000 | 3.571881000  |
| H | -2.461281000 | -1.977297000 | 4.510071000  |
| C | -0.335856000 | 1.897830000  | 2.018452000  |
| C | 0.966363000  | 1.356956000  | 1.945797000  |
| C | 1.643510000  | 1.168875000  | 3.170964000  |
| C | 1.065021000  | 1.515659000  | 4.390225000  |
| C | -0.217867000 | 2.060705000  | 4.443941000  |
| C | -0.901608000 | 2.242762000  | 3.242682000  |
| H | -0.908133000 | 2.071562000  | 1.113142000  |
| H | 2.658840000  | 0.778949000  | 3.155941000  |
| H | 1.623789000  | 1.376284000  | 5.312142000  |
| C | -3.641672000 | -1.877042000 | -3.032100000 |
| C | -3.084550000 | -0.800309000 | -2.321750000 |
| C | -3.938313000 | 0.073493000  | -1.624255000 |
| C | -5.308719000 | -0.153176000 | -1.627011000 |
| C | -5.859113000 | -1.235154000 | -2.321385000 |



|    |              |              |              |
|----|--------------|--------------|--------------|
| C  | -5.016573000 | -2.092337000 | -3.024724000 |
| H  | -2.992549000 | -2.543159000 | -3.594495000 |
| H  | -3.548476000 | 0.946575000  | -1.110597000 |
| H  | -5.440051000 | -2.925743000 | -3.577315000 |
| C  | -1.638305000 | -0.606382000 | -2.363892000 |
| C  | -0.887001000 | 0.229463000  | -1.607296000 |
| H  | -1.123321000 | -1.199573000 | -3.117703000 |
| H  | 0.148027000  | 0.430162000  | -1.895222000 |
| H  | -1.331392000 | 0.919561000  | -0.892378000 |
| Si | 4.537700000  | -1.355200000 | -0.583154000 |
| C  | 5.528721000  | -2.948020000 | -0.867838000 |
| H  | 6.595592000  | -2.719204000 | -0.974935000 |
| H  | 5.419453000  | -3.647748000 | -0.031851000 |
| H  | 5.202379000  | -3.462599000 | -1.778576000 |
| C  | 5.215049000  | -0.503174000 | 0.972356000  |
| H  | 4.704435000  | 0.436204000  | 1.208615000  |
| H  | 5.199030000  | -1.142849000 | 1.859440000  |
| H  | 6.265410000  | -0.255350000 | 0.773625000  |
| C  | 4.851656000  | -0.181508000 | -2.038962000 |
| H  | 5.900041000  | 0.137372000  | -1.987069000 |
| H  | 4.708003000  | -0.661600000 | -3.011285000 |
| H  | 4.236034000  | 0.722876000  | -2.000238000 |
| Cl | -2.517940000 | 2.905165000  | 3.268349000  |
| Cl | -6.354332000 | 0.931991000  | -0.765826000 |
| H  | -6.933532000 | -1.387917000 | -2.318601000 |
| H  | -0.673625000 | 2.344535000  | 5.386652000  |

***m*TS2<sup>a</sup><sub>syn</sub>,  $E_{(\text{SCF Done})} = -3024.914405$  a.u., IF = *i*141.48 cm<sup>-1</sup>**

|    |              |              |              |
|----|--------------|--------------|--------------|
| Sc | 0.209951000  | -1.193261000 | -0.092219000 |
| Si | 2.035043000  | 4.977551000  | -1.015623000 |
| C  | 1.030465000  | 3.495373000  | -0.312847000 |
| C  | 2.466231000  | 4.639449000  | -2.831988000 |
| C  | 3.619766000  | 5.204477000  | -0.000239000 |
| C  | 0.940394000  | 6.516192000  | -0.883045000 |
| C  | 2.492424000  | -2.190859000 | -0.179431000 |
| C  | 1.888085000  | -2.439018000 | -1.456649000 |
| C  | 0.786092000  | -3.331938000 | -1.284297000 |
| C  | 0.692257000  | -3.642903000 | 0.100800000  |
| C  | 1.716876000  | -2.930860000 | 0.783220000  |
| C  | 2.404436000  | -1.997675000 | -2.797829000 |
| C  | 0.019163000  | -4.010503000 | -2.383118000 |
| C  | -0.182611000 | -4.687534000 | 0.727928000  |
| C  | 2.027725000  | -3.148071000 | 2.239055000  |
| C  | 1.798543000  | 2.171090000  | -0.277489000 |

|   |               |               |               |
|---|---------------|---------------|---------------|
| C | 1. 075126000  | 0. 897105000  | 0. 200061000  |
| H | 0. 113341000  | 3. 422298000  | -0. 915225000 |
| H | 0. 712160000  | 3. 777503000  | 0. 699209000  |
| H | 3. 114261000  | 3. 762768000  | -2. 947880000 |
| H | 2. 998267000  | 5. 495702000  | -3. 262446000 |
| H | 1. 563869000  | 4. 477414000  | -3. 433291000 |
| H | 3. 396265000  | 5. 353685000  | 1. 062503000  |
| H | 4. 171016000  | 6. 085562000  | -0. 348434000 |
| H | 4. 290935000  | 4. 342520000  | -0. 088854000 |
| H | 0. 014624000  | 6. 399866000  | -1. 458284000 |
| H | 1. 463304000  | 7. 397505000  | -1. 271696000 |
| H | 0. 667021000  | 6. 724860000  | 0. 157613000  |
| H | 2. 890473000  | -1. 021341000 | -2. 759172000 |
| H | 1. 614383000  | -1. 948097000 | -3. 554149000 |
| H | 3. 148180000  | -2. 711817000 | -3. 175807000 |
| H | 0. 000062000  | -3. 424487000 | -3. 307061000 |
| H | -1. 018664000 | -4. 228197000 | -2. 108904000 |
| H | 0. 488717000  | -4. 971150000 | -2. 633625000 |
| H | 0. 403699000  | -5. 592963000 | 0. 934460000  |
| H | -1. 006555000 | -4. 989593000 | 0. 075333000  |
| H | -0. 606924000 | -4. 363777000 | 1. 684556000  |
| H | 1. 122961000  | -3. 188938000 | 2. 856430000  |
| H | 2. 675240000  | -2. 371869000 | 2. 650579000  |
| H | 2. 545688000  | -4. 106584000 | 2. 379530000  |
| H | 2. 666309000  | 2. 309980000  | 0. 384821000  |
| H | 2. 226591000  | 1. 965320000  | -1. 268130000 |
| H | 1. 881193000  | 0. 138742000  | 0. 332209000  |
| C | -2. 087392000 | -1. 583892000 | 2. 241919000  |
| O | -1. 727191000 | -1. 740891000 | 0. 830298000  |
| C | -2. 785588000 | -2. 494164000 | 0. 146468000  |
| C | -3. 603845000 | -3. 127910000 | 1. 255209000  |
| C | -3. 526270000 | -2. 062345000 | 2. 349238000  |
| H | -1. 403798000 | -2. 204726000 | 2. 830065000  |
| H | -1. 949643000 | -0. 536703000 | 2. 501597000  |
| H | -3. 371939000 | -1. 780920000 | -0. 434844000 |
| H | -2. 300099000 | -3. 201427000 | -0. 526777000 |
| H | -4. 627491000 | -3. 333207000 | 0. 930167000  |
| H | -3. 154973000 | -4. 068630000 | 1. 592037000  |
| H | -4. 220971000 | -1. 241844000 | 2. 139421000  |
| H | -3. 749136000 | -2. 451269000 | 3. 346565000  |
| C | -0. 803977000 | 1. 818830000  | 1. 649404000  |
| C | 0. 332534000  | 0. 991639000  | 1. 486257000  |
| C | 0. 794614000  | 0. 285644000  | 2. 618984000  |
| C | 0. 188039000  | 0. 442459000  | 3. 869655000  |

|    |              |              |              |
|----|--------------|--------------|--------------|
| C  | -0.892248000 | 1.300596000  | 4.027578000  |
| C  | -1.383378000 | 1.976946000  | 2.901959000  |
| H  | -1.207612000 | 2.368769000  | 0.807774000  |
| H  | 1.701145000  | -0.307197000 | 2.541005000  |
| H  | 0.586902000  | -0.083759000 | 4.732751000  |
| C  | -2.939669000 | -1.270034000 | -3.118325000 |
| C  | -2.214493000 | -0.386334000 | -2.299421000 |
| C  | -2.925102000 | 0.593142000  | -1.585957000 |
| C  | -4.309986000 | 0.675415000  | -1.698994000 |
| C  | -5.027255000 | -0.200021000 | -2.514134000 |
| C  | -4.323539000 | -1.171549000 | -3.225273000 |
| H  | -2.407942000 | -2.024169000 | -3.693128000 |
| H  | -2.408643000 | 1.290884000  | -0.935213000 |
| H  | -4.864792000 | -1.852966000 | -3.875949000 |
| C  | -0.747319000 | -0.490892000 | -2.252694000 |
| C  | 0.101038000  | 0.560896000  | -1.937708000 |
| H  | -0.325917000 | -1.316219000 | -2.820179000 |
| H  | 1.129658000  | 0.519730000  | -2.280706000 |
| H  | -0.290414000 | 1.558619000  | -1.778028000 |
| Si | 4.280805000  | -1.557466000 | 0.143546000  |
| C  | 5.331472000  | -3.113726000 | 0.393546000  |
| H  | 6.383853000  | -2.842769000 | 0.538318000  |
| H  | 5.009643000  | -3.684985000 | 1.270709000  |
| H  | 5.270547000  | -3.773726000 | -0.478736000 |
| C  | 4.454771000  | -0.442645000 | 1.675607000  |
| H  | 3.858156000  | 0.473643000  | 1.609523000  |
| H  | 4.222412000  | -0.940407000 | 2.622248000  |
| H  | 5.506127000  | -0.133894000 | 1.733252000  |
| C  | 4.997137000  | -0.558523000 | -1.300493000 |
| H  | 5.987173000  | -0.199257000 | -0.993563000 |
| H  | 5.135654000  | -1.155091000 | -2.206718000 |
| H  | 4.397930000  | 0.323778000  | -1.551180000 |
| Cl | -2.746281000 | 3.037616000  | 3.081050000  |
| Cl | -5.160993000 | 1.897668000  | -0.796780000 |
| H  | -6.105797000 | -0.114522000 | -2.593501000 |
| H  | -1.353185000 | 1.454803000  | 4.997765000  |

***mP2***<sup>a</sup><sub>syn</sub>,  $E_{(\text{SCF Done})} = -3024.957533$  a.u.

|    |              |              |              |
|----|--------------|--------------|--------------|
| Sc | -1.176956000 | -0.716652000 | -0.099137000 |
| Si | 5.928174000  | 0.859789000  | -0.718958000 |
| C  | 4.026763000  | 1.052171000  | -0.509024000 |
| C  | 6.303365000  | 0.085637000  | -2.409018000 |
| C  | 6.604903000  | -0.246715000 | 0.665369000  |
| C  | 6.691882000  | 2.588450000  | -0.603592000 |

|   |              |              |              |
|---|--------------|--------------|--------------|
| C | -0.822028000 | -3.150745000 | -0.150740000 |
| C | -1.128358000 | -2.749759000 | -1.500016000 |
| C | -2.464426000 | -2.268469000 | -1.544297000 |
| C | -3.015820000 | -2.379213000 | -0.229950000 |
| C | -2.013572000 | -2.910708000 | 0.622568000  |
| C | -0.242628000 | -2.927917000 | -2.700122000 |
| C | -3.228368000 | -1.868235000 | -2.772177000 |
| C | -4.454576000 | -2.153752000 | 0.135515000  |
| C | -2.237432000 | -3.256419000 | 2.068962000  |
| C | 3.242578000  | -0.256722000 | -0.584868000 |
| C | 1.690020000  | -0.150025000 | -0.499387000 |
| H | 3.686720000  | 1.753717000  | -1.283549000 |
| H | 3.865867000  | 1.548008000  | 0.458470000  |
| H | 5.888012000  | -0.924928000 | -2.497444000 |
| H | 7.386152000  | 0.008553000  | -2.561180000 |
| H | 5.897489000  | 0.692166000  | -3.226967000 |
| H | 6.373919000  | 0.163420000  | 1.655526000  |
| H | 7.695260000  | -0.329067000 | 0.588825000  |
| H | 6.196212000  | -1.262641000 | 0.615058000  |
| H | 6.306439000  | 3.249947000  | -1.387886000 |
| H | 7.780868000  | 2.538422000  | -0.716966000 |
| H | 6.480001000  | 3.054716000  | 0.365443000  |
| H | 0.799300000  | -2.667590000 | -2.495469000 |
| H | -0.573690000 | -2.320521000 | -3.546927000 |
| H | -0.255945000 | -3.972766000 | -3.037764000 |
| H | -2.566040000 | -1.575113000 | -3.590599000 |
| H | -3.916021000 | -1.035263000 | -2.591987000 |
| H | -3.832931000 | -2.710436000 | -3.134322000 |
| H | -4.986993000 | -3.112906000 | 0.179433000  |
| H | -4.976486000 | -1.540905000 | -0.605246000 |
| H | -4.578410000 | -1.678647000 | 1.114292000  |
| H | -3.126058000 | -2.757603000 | 2.468125000  |
| H | -1.388541000 | -2.991776000 | 2.706562000  |
| H | -2.404231000 | -4.334683000 | 2.191604000  |
| H | 3.580965000  | -0.936718000 | 0.208173000  |
| H | 3.457836000  | -0.761223000 | -1.536634000 |
| H | 1.338185000  | -1.191142000 | -0.640145000 |
| C | -2.786946000 | 0.727485000  | 2.357154000  |
| O | -2.617375000 | 0.572102000  | 0.910901000  |
| C | -3.727542000 | 1.246251000  | 0.212486000  |
| C | -4.739752000 | 1.565273000  | 1.297513000  |
| C | -3.847625000 | 1.803828000  | 2.516803000  |
| H | -3.113663000 | -0.236946000 | 2.761274000  |
| H | -1.816544000 | 0.992790000  | 2.776969000  |

|    |              |              |              |
|----|--------------|--------------|--------------|
| H  | -3.315586000 | 2.141920000  | -0.253902000 |
| H  | -4.092046000 | 0.564939000  | -0.557342000 |
| H  | -5.343568000 | 2.437894000  | 1.034277000  |
| H  | -5.415546000 | 0.720303000  | 1.469704000  |
| H  | -3.392658000 | 2.799314000  | 2.475403000  |
| H  | -4.381617000 | 1.708740000  | 3.466210000  |
| C  | 1.302721000  | 1.609074000  | 1.321398000  |
| C  | 1.248801000  | 0.271633000  | 0.892622000  |
| C  | 0.867364000  | -0.708168000 | 1.830362000  |
| C  | 0.600902000  | -0.370255000 | 3.164631000  |
| C  | 0.698666000  | 0.949329000  | 3.587989000  |
| C  | 1.041433000  | 1.931927000  | 2.652121000  |
| H  | 1.597391000  | 2.396746000  | 0.637224000  |
| H  | 0.888972000  | -1.758036000 | 1.541827000  |
| H  | 0.348628000  | -1.147724000 | 3.880721000  |
| C  | -2.262761000 | 1.744871000  | -3.041838000 |
| C  | -1.251868000 | 1.701400000  | -2.059111000 |
| C  | -1.077466000 | 2.859883000  | -1.275546000 |
| C  | -1.869673000 | 3.987611000  | -1.477209000 |
| C  | -2.870153000 | 4.017162000  | -2.446013000 |
| C  | -3.052864000 | 2.875371000  | -3.227134000 |
| H  | -2.403847000 | 0.886614000  | -3.693493000 |
| H  | -0.319689000 | 2.893014000  | -0.500254000 |
| H  | -3.809757000 | 2.880607000  | -4.007426000 |
| C  | -0.432255000 | 0.473788000  | -1.861170000 |
| C  | 1.081845000  | 0.693733000  | -1.637630000 |
| H  | -0.568343000 | -0.168572000 | -2.736827000 |
| H  | 1.628231000  | 0.437081000  | -2.555663000 |
| H  | 1.296331000  | 1.753956000  | -1.464420000 |
| Si | 0.519229000  | -4.452589000 | 0.297075000  |
| C  | -0.207655000 | -6.111318000 | -0.260618000 |
| H  | 0.490892000  | -6.927639000 | -0.042314000 |
| H  | -1.148958000 | -6.327027000 | 0.256965000  |
| H  | -0.408474000 | -6.120885000 | -1.337458000 |
| C  | 0.888931000  | -4.569719000 | 2.157466000  |
| H  | 1.275802000  | -3.646403000 | 2.602473000  |
| H  | 0.026931000  | -4.901731000 | 2.742703000  |
| H  | 1.671655000  | -5.328797000 | 2.279874000  |
| C  | 2.182453000  | -4.180679000 | -0.572842000 |
| H  | 2.881852000  | -4.936786000 | -0.195009000 |
| H  | 2.123184000  | -4.310725000 | -1.657195000 |
| H  | 2.626227000  | -3.201017000 | -0.365532000 |
| Cl | 1.160862000  | 3.582170000  | 3.162790000  |
| Cl | -1.604830000 | 5.393012000  | -0.475132000 |

|   |              |             |              |
|---|--------------|-------------|--------------|
| H | -3.470660000 | 4.908274000 | -2.593847000 |
| H | 0.522702000  | 1.222707000 | 4.623547000  |

**$mC2^a_{iso}$** ,  $E_{(SCF Done)} = -3024.936039$  a.u.

|    |              |              |              |
|----|--------------|--------------|--------------|
| Sc | 0.837860000  | -0.629161000 | -0.017208000 |
| Si | -2.949497000 | 4.146470000  | -1.328012000 |
| C  | -1.184579000 | 3.408002000  | -1.248092000 |
| C  | -3.646912000 | 4.334144000  | 0.428238000  |
| C  | -4.078582000 | 3.003948000  | -2.342237000 |
| C  | -2.841646000 | 5.843918000  | -2.162997000 |
| C  | 0.167010000  | -0.095083000 | -3.464922000 |
| C  | 0.624965000  | -1.070550000 | -2.421418000 |
| C  | -0.248562000 | -1.986337000 | -1.777162000 |
| C  | 0.544672000  | -2.894294000 | -1.006585000 |
| C  | 1.903507000  | -2.519137000 | -1.157317000 |
| C  | 1.977363000  | -1.362902000 | -2.017293000 |
| C  | -1.727860000 | -2.091285000 | -2.007723000 |
| C  | 0.030346000  | -4.126794000 | -0.320298000 |
| C  | 3.066438000  | -3.291385000 | -0.600276000 |
| C  | -1.055533000 | 2.014599000  | -0.610029000 |
| C  | 0.392459000  | 1.494533000  | -0.549501000 |
| H  | -0.546755000 | 4.117044000  | -0.700971000 |
| H  | -0.785232000 | 3.374998000  | -2.272538000 |
| H  | -3.746401000 | 3.368077000  | 0.937798000  |
| H  | -4.642594000 | 4.791568000  | 0.399158000  |
| H  | -3.006218000 | 4.975668000  | 1.044448000  |
| H  | -3.684701000 | 2.852572000  | -3.354244000 |
| H  | -5.078988000 | 3.441148000  | -2.440622000 |
| H  | -4.197671000 | 2.019366000  | -1.874468000 |
| H  | -2.199630000 | 6.526632000  | -1.594571000 |
| H  | -3.832466000 | 6.306310000  | -2.240481000 |
| H  | -2.431899000 | 5.763753000  | -3.176489000 |
| H  | -0.849082000 | 0.260935000  | -3.270345000 |
| H  | 0.152153000  | -0.578180000 | -4.451444000 |
| H  | 0.814859000  | 0.778205000  | -3.542337000 |
| H  | -2.202306000 | -1.111500000 | -2.122671000 |
| H  | -2.238082000 | -2.615112000 | -1.195386000 |
| H  | -1.930947000 | -2.651034000 | -2.930692000 |
| H  | -0.985479000 | -3.995125000 | 0.062606000  |
| H  | 0.667068000  | -4.448535000 | 0.510910000  |
| H  | -0.003772000 | -4.966146000 | -1.027920000 |
| H  | 3.455497000  | -3.994437000 | -1.348114000 |
| H  | 2.783136000  | -3.893009000 | 0.269389000  |
| H  | 3.897654000  | -2.645811000 | -0.303966000 |

|    |               |               |               |
|----|---------------|---------------|---------------|
| H  | -1. 676924000 | 1. 302942000  | -1. 173817000 |
| H  | -1. 489845000 | 2. 051937000  | 0. 399032000  |
| H  | 0. 840040000  | 1. 609019000  | -1. 544819000 |
| C  | 3. 385212000  | -0. 359877000 | 2. 090840000  |
| O  | 2. 125505000  | -1. 037325000 | 1. 745735000  |
| C  | 1. 898599000  | -2. 140415000 | 2. 672708000  |
| C  | 3. 230723000  | -2. 361852000 | 3. 367138000  |
| C  | 3. 788978000  | -0. 938651000 | 3. 436034000  |
| H  | 4. 105995000  | -0. 600079000 | 1. 304586000  |
| H  | 3. 189828000  | 0. 711829000  | 2. 102349000  |
| H  | 1. 125909000  | -1. 828398000 | 3. 385019000  |
| H  | 1. 542200000  | -2. 996055000 | 2. 094974000  |
| H  | 3. 105532000  | -2. 823935000 | 4. 350135000  |
| H  | 3. 878754000  | -3. 006485000 | 2. 763201000  |
| H  | 3. 323071000  | -0. 377695000 | 4. 253595000  |
| H  | 4. 872591000  | -0. 911047000 | 3. 578544000  |
| C  | 0. 900017000  | 2. 393896000  | 1. 771612000  |
| C  | 1. 290425000  | 2. 149788000  | 0. 434723000  |
| C  | 2. 606530000  | 2. 525694000  | 0. 077034000  |
| C  | 3. 467429000  | 3. 131889000  | 0. 988188000  |
| C  | 3. 066919000  | 3. 371413000  | 2. 303230000  |
| C  | 1. 776846000  | 2. 990862000  | 2. 673982000  |
| H  | -0. 110117000 | 2. 170439000  | 2. 101996000  |
| H  | 2. 927560000  | 2. 393727000  | -0. 953309000 |
| H  | 4. 459110000  | 3. 442196000  | 0. 668764000  |
| C  | -3. 292728000 | -3. 734308000 | 1. 882746000  |
| C  | -2. 990465000 | -2. 395060000 | 1. 581948000  |
| C  | -3. 952211000 | -1. 609786000 | 0. 921773000  |
| C  | -5. 170717000 | -2. 169947000 | 0. 562984000  |
| C  | -5. 464243000 | -3. 506356000 | 0. 852649000  |
| C  | -4. 517835000 | -4. 282733000 | 1. 516007000  |
| H  | -2. 564192000 | -4. 344010000 | 2. 411634000  |
| H  | -3. 765766000 | -0. 564354000 | 0. 700418000  |
| H  | -4. 744071000 | -5. 318085000 | 1. 752655000  |
| C  | -1. 700358000 | -1. 859270000 | 2. 004001000  |
| C  | -1. 176289000 | -0. 637020000 | 1. 743563000  |
| H  | -1. 124757000 | -2. 534422000 | 2. 638186000  |
| H  | -0. 312558000 | -0. 291438000 | 2. 313217000  |
| H  | -1. 727425000 | 0. 118956000  | 1. 189297000  |
| Si | 3. 603218000  | -0. 748017000 | -2. 833312000 |
| C  | 4. 933391000  | -0. 279630000 | -1. 556903000 |
| H  | 4. 581920000  | 0. 486294000  | -0. 856760000 |
| H  | 5. 307132000  | -1. 134201000 | -0. 983659000 |
| H  | 5. 792604000  | 0. 141515000  | -2. 093409000 |

|    |              |              |              |
|----|--------------|--------------|--------------|
| C  | 3.370231000  | 0.770255000  | -3.943276000 |
| H  | 4.358789000  | 1.048776000  | -4.329087000 |
| H  | 2.731380000  | 0.566171000  | -4.807650000 |
| H  | 2.971006000  | 1.644068000  | -3.416584000 |
| C  | 4.245751000  | -2.167100000 | -3.911839000 |
| H  | 5.153722000  | -1.854532000 | -4.441007000 |
| H  | 4.493402000  | -3.057501000 | -3.325075000 |
| H  | 3.501706000  | -2.454096000 | -4.663086000 |
| H  | 3.725480000  | 3.854356000  | 3.017231000  |
| H  | -6.425600000 | -3.921619000 | 0.568128000  |
| Cl | 1.239772000  | 3.276015000  | 4.308750000  |
| Cl | -6.352805000 | -1.192957000 | -0.249743000 |

***m*TS2<sup>a</sup><sub>iso</sub>,  $E_{(\text{SCF Done})} = -3024.910673$  a.u.  $\text{IF} = i 211.34 \text{ cm}^{-1}$**

|    |              |              |              |
|----|--------------|--------------|--------------|
| Sc | 0.822713000  | -0.515933000 | 0.222839000  |
| Si | -4.688094000 | 2.799731000  | -0.965107000 |
| C  | -2.907729000 | 2.496395000  | -0.299507000 |
| C  | -5.774203000 | 1.290247000  | -0.598826000 |
| C  | -4.617459000 | 3.109761000  | -2.834270000 |
| C  | -5.364558000 | 4.324714000  | -0.070286000 |
| C  | 0.700741000  | -1.112975000 | -3.273087000 |
| C  | 1.262483000  | -1.584534000 | -1.958839000 |
| C  | 0.654994000  | -2.591544000 | -1.164786000 |
| C  | 1.536858000  | -2.890698000 | -0.079403000 |
| C  | 2.692393000  | -2.072213000 | -0.223103000 |
| C  | 2.541099000  | -1.239736000 | -1.385878000 |
| C  | -0.583856000 | -3.354235000 | -1.531395000 |
| C  | 1.382626000  | -4.029771000 | 0.885145000  |
| C  | 3.925934000  | -2.198812000 | 0.625985000  |
| C  | -2.147140000 | 1.369292000  | -1.002683000 |
| C  | -0.718477000 | 1.018052000  | -0.541017000 |
| H  | -2.997566000 | 2.320898000  | 0.782265000  |
| H  | -2.366372000 | 3.444110000  | -0.415890000 |
| H  | -5.414258000 | 0.385940000  | -1.102648000 |
| H  | -6.798267000 | 1.468723000  | -0.947121000 |
| H  | -5.826223000 | 1.081695000  | 0.476177000  |
| H  | -3.951245000 | 3.944656000  | -3.080986000 |
| H  | -5.614781000 | 3.361523000  | -3.213092000 |
| H  | -4.273741000 | 2.225904000  | -3.384090000 |
| H  | -5.397596000 | 4.173091000  | 1.014810000  |
| H  | -6.384585000 | 4.546339000  | -0.404424000 |
| H  | -4.750877000 | 5.210859000  | -0.269001000 |
| H  | -0.382687000 | -1.260367000 | -3.324425000 |
| H  | 1.134532000  | -1.686036000 | -4.103295000 |



|   |              |              |              |
|---|--------------|--------------|--------------|
| H | 0.904160000  | -0.057616000 | -3.475476000 |
| H | -1.381706000 | -2.711887000 | -1.917593000 |
| H | -0.993300000 | -3.910951000 | -0.687124000 |
| H | -0.347271000 | -4.079530000 | -2.321733000 |
| H | 0.334263000  | -4.274104000 | 1.069078000  |
| H | 1.852160000  | -3.830091000 | 1.854815000  |
| H | 1.863194000  | -4.932038000 | 0.483510000  |
| H | 4.702094000  | -2.764784000 | 0.095027000  |
| H | 3.726570000  | -2.745359000 | 1.552396000  |
| H | 4.361142000  | -1.231610000 | 0.890439000  |
| H | -2.071460000 | 1.636521000  | -2.067540000 |
| H | -2.740665000 | 0.445231000  | -0.983616000 |
| H | -0.325889000 | 0.366393000  | -1.360226000 |
| C | 2.891634000  | 1.242021000  | 2.077674000  |
| O | 1.977682000  | 0.094246000  | 2.031978000  |
| C | 2.097582000  | -0.667037000 | 3.276848000  |
| C | 3.345927000  | -0.134496000 | 3.957924000  |
| C | 3.343806000  | 1.332121000  | 3.524883000  |
| H | 3.722476000  | 1.029870000  | 1.399137000  |
| H | 2.341319000  | 2.113746000  | 1.727209000  |
| H | 1.199666000  | -0.471388000 | 3.872847000  |
| H | 2.145535000  | -1.726701000 | 3.018225000  |
| H | 3.300470000  | -0.263742000 | 5.042675000  |
| H | 4.239547000  | -0.648681000 | 3.587939000  |
| H | 2.628117000  | 1.911801000  | 4.118439000  |
| H | 4.324039000  | 1.808144000  | 3.613538000  |
| C | 0.048961000  | 3.098185000  | 0.685793000  |
| C | 0.254154000  | 2.105208000  | -0.305899000 |
| C | 1.444847000  | 2.175702000  | -1.060298000 |
| C | 2.364466000  | 3.215421000  | -0.872485000 |
| C | 2.128879000  | 4.207190000  | 0.068076000  |
| C | 0.962980000  | 4.129454000  | 0.844431000  |
| H | -0.841301000 | 3.083617000  | 1.302578000  |
| H | 1.599878000  | 1.475828000  | -1.875115000 |
| H | 3.251476000  | 3.268121000  | -1.497322000 |
| C | -1.784398000 | -3.556631000 | 2.335505000  |
| C | -1.879367000 | -2.401674000 | 1.539826000  |
| C | -2.936253000 | -2.320320000 | 0.619832000  |
| C | -3.849555000 | -3.363043000 | 0.504041000  |
| C | -3.748635000 | -4.511117000 | 1.287412000  |
| C | -2.705929000 | -4.592228000 | 2.208440000  |
| H | -0.996669000 | -3.630299000 | 3.081683000  |
| H | -3.050559000 | -1.452033000 | -0.020277000 |
| H | -2.619225000 | -5.471713000 | 2.840551000  |

|    |              |              |              |
|----|--------------|--------------|--------------|
| C  | -0.936694000 | -1.289822000 | 1.752244000  |
| C  | -1.264420000 | 0.040805000  | 1.490361000  |
| H  | -0.175684000 | -1.480797000 | 2.508836000  |
| H  | -0.743066000 | 0.827219000  | 2.034829000  |
| H  | -2.275612000 | 0.293862000  | 1.195017000  |
| Si | 4.032453000  | -0.494347000 | -2.336656000 |
| C  | 5.195024000  | 0.530457000  | -1.238552000 |
| H  | 4.673941000  | 1.341630000  | -0.719199000 |
| H  | 5.723027000  | -0.076905000 | -0.497049000 |
| H  | 5.958586000  | 0.989925000  | -1.878217000 |
| C  | 3.550113000  | 0.593868000  | -3.817176000 |
| H  | 4.484031000  | 0.955524000  | -4.265632000 |
| H  | 3.020231000  | 0.031081000  | -4.591232000 |
| H  | 2.952994000  | 1.477375000  | -3.567680000 |
| C  | 4.984755000  | -1.981625000 | -3.026163000 |
| H  | 5.851526000  | -1.642290000 | -3.605628000 |
| H  | 5.352835000  | -2.642700000 | -2.234430000 |
| H  | 4.349875000  | -2.577767000 | -3.691083000 |
| H  | 2.817280000  | 5.035195000  | 0.201177000  |
| H  | -4.470760000 | -5.313503000 | 1.181131000  |
| Cl | 0.662340000  | 5.354488000  | 2.039645000  |
| Cl | -5.138373000 | -3.230075000 | -0.660737000 |

**mP2<sup>a</sup><sub>iso</sub>**,  $E_{(\text{SCF Done})} = -3024.956828$  a.u.

|    |              |              |              |
|----|--------------|--------------|--------------|
| Sc | -1.061577000 | -0.046524000 | -0.032644000 |
| Si | 5.941371000  | -0.891979000 | -0.911565000 |
| C  | 4.249842000  | -0.514510000 | -0.079079000 |
| C  | 6.326883000  | 0.447841000  | -2.196406000 |
| C  | 5.867318000  | -2.592371000 | -1.749233000 |
| C  | 7.254630000  | -0.893624000 | 0.452316000  |
| C  | -0.321437000 | -0.764897000 | -3.459343000 |
| C  | -1.349506000 | -0.275335000 | -2.475060000 |
| C  | -1.538483000 | 1.102528000  | -2.170854000 |
| C  | -2.694808000 | 1.215256000  | -1.345831000 |
| C  | -3.229328000 | -0.091376000 | -1.162399000 |
| C  | -2.396037000 | -1.042146000 | -1.847838000 |
| C  | -0.786407000 | 2.248311000  | -2.775774000 |
| C  | -3.306134000 | 2.500797000  | -0.870224000 |
| C  | -4.545479000 | -0.363716000 | -0.489410000 |
| C  | 3.058959000  | -0.496858000 | -1.035066000 |
| C  | 1.669382000  | -0.191222000 | -0.394097000 |
| H  | 4.354162000  | 0.452774000  | 0.431008000  |
| H  | 4.102789000  | -1.268325000 | 0.707384000  |
| H  | 5.590364000  | 0.463374000  | -3.008203000 |

|   |              |              |              |
|---|--------------|--------------|--------------|
| H | 7.308686000  | 0.269457000  | -2.649965000 |
| H | 6.350181000  | 1.444589000  | -1.740809000 |
| H | 5.617483000  | -3.383394000 | -1.032400000 |
| H | 6.840566000  | -2.841119000 | -2.187920000 |
| H | 5.128498000  | -2.620520000 | -2.558613000 |
| H | 7.301762000  | 0.074243000  | 0.964458000  |
| H | 8.247227000  | -1.095584000 | 0.033688000  |
| H | 7.048647000  | -1.663984000 | 1.204275000  |
| H | 0.500290000  | -0.050662000 | -3.572235000 |
| H | -0.771856000 | -0.879546000 | -4.454001000 |
| H | 0.110563000  | -1.733400000 | -3.194455000 |
| H | 0.290638000  | 2.062599000  | -2.847386000 |
| H | -0.930368000 | 3.169097000  | -2.207819000 |
| H | -1.145065000 | 2.433450000  | -3.797362000 |
| H | -2.550445000 | 3.229695000  | -0.562664000 |
| H | -3.986923000 | 2.345229000  | -0.027182000 |
| H | -3.897610000 | 2.961007000  | -1.673142000 |
| H | -5.373688000 | -0.042399000 | -1.134309000 |
| H | -4.657630000 | 0.180795000  | 0.455008000  |
| H | -4.693574000 | -1.425914000 | -0.283832000 |
| H | 2.982382000  | -1.462020000 | -1.552329000 |
| H | 3.214964000  | 0.261030000  | -1.814385000 |
| H | 0.974869000  | -0.238403000 | -1.261374000 |
| C | -2.649215000 | -1.833702000 | 2.247029000  |
| O | -2.118498000 | -0.531942000 | 1.830704000  |
| C | -2.521025000 | 0.491414000  | 2.799456000  |
| C | -3.600286000 | -0.164565000 | 3.642023000  |
| C | -3.141337000 | -1.623804000 | 3.669331000  |
| H | -3.461534000 | -2.090971000 | 1.564049000  |
| H | -1.842203000 | -2.561523000 | 2.155533000  |
| H | -1.637849000 | 0.743380000  | 3.394547000  |
| H | -2.849668000 | 1.371440000  | 2.242035000  |
| H | -3.664583000 | 0.284740000  | 4.636666000  |
| H | -4.580465000 | -0.073728000 | 3.161073000  |
| H | -2.324764000 | -1.759659000 | 4.386937000  |
| H | -3.942992000 | -2.321209000 | 3.926885000  |
| C | 1.581787000  | -1.247167000 | 1.934548000  |
| C | 1.267563000  | -1.301775000 | 0.565842000  |
| C | 0.657367000  | -2.467218000 | 0.064514000  |
| C | 0.415989000  | -3.565641000 | 0.897504000  |
| C | 0.755270000  | -3.514892000 | 2.245157000  |
| C | 1.325638000  | -2.343700000 | 2.754276000  |
| H | 2.050830000  | -0.364480000 | 2.356208000  |
| H | 0.448167000  | -2.547398000 | -1.000776000 |

|    |              |              |              |
|----|--------------|--------------|--------------|
| H  | -0.016902000 | -4.473045000 | 0.485799000  |
| C  | -0.722524000 | 3.564275000  | 2.039486000  |
| C  | -0.053219000 | 3.071270000  | 0.902483000  |
| C  | 0.369500000  | 4.022109000  | -0.044258000 |
| C  | 0.095579000  | 5.376129000  | 0.130741000  |
| C  | -0.593308000 | 5.849100000  | 1.244268000  |
| C  | -0.991900000 | 4.919920000  | 2.202600000  |
| H  | -1.005405000 | 2.876076000  | 2.831399000  |
| H  | 0.923390000  | 3.723226000  | -0.926536000 |
| H  | -1.503282000 | 5.263626000  | 3.098143000  |
| C  | 0.194302000  | 1.611920000  | 0.733750000  |
| C  | 1.580839000  | 1.235208000  | 0.179580000  |
| H  | 0.102452000  | 1.148270000  | 1.741476000  |
| H  | 2.364972000  | 1.383114000  | 0.936709000  |
| H  | 1.843817000  | 1.905781000  | -0.644849000 |
| Si | -2.931866000 | -2.832141000 | -2.280198000 |
| C  | -3.369209000 | -3.889494000 | -0.760761000 |
| H  | -2.544979000 | -3.943144000 | -0.041124000 |
| H  | -4.268130000 | -3.553476000 | -0.233759000 |
| H  | -3.568174000 | -4.911897000 | -1.104815000 |
| C  | -1.603900000 | -3.803642000 | -3.225419000 |
| H  | -2.010667000 | -4.802591000 | -3.426083000 |
| H  | -1.358395000 | -3.354526000 | -4.191951000 |
| H  | -0.672478000 | -3.944951000 | -2.665334000 |
| C  | -4.456778000 | -2.681791000 | -3.393256000 |
| H  | -4.804882000 | -3.675250000 | -3.699593000 |
| H  | -5.287129000 | -2.177760000 | -2.887677000 |
| H  | -4.223132000 | -2.113594000 | -4.300417000 |
| H  | 0.589989000  | -4.366586000 | 2.897394000  |
| H  | -0.791160000 | 6.908766000  | 1.363208000  |
| Cl | 1.734668000  | -2.258620000 | 4.437812000  |
| Cl | 0.640810000  | 6.505662000  | -1.081904000 |

***mC1<sup>b</sup>***,  $E_{(\text{SCF Done})} = -1979.703125$  a.u.

|    |              |             |              |
|----|--------------|-------------|--------------|
| Sc | -0.552885000 | 0.087840000 | 0.009924000  |
| N  | 0.900465000  | 1.879215000 | 0.145121000  |
| C  | -0.843128000 | 0.996136000 | -1.975082000 |
| H  | 0.143396000  | 0.904299000 | -2.445644000 |
| H  | -1.614607000 | 0.770573000 | -2.711709000 |
| C  | -1.087170000 | 2.262372000 | -1.261436000 |
| C  | -0.283809000 | 2.678340000 | -0.156879000 |
| C  | -0.610531000 | 3.825041000 | 0.586311000  |
| H  | 0.022939000  | 4.144328000 | 1.407499000  |
| C  | -1.727004000 | 4.579326000 | 0.261087000  |

|   |              |              |              |
|---|--------------|--------------|--------------|
| H | -1.961730000 | 5.472308000  | 0.832672000  |
| C | -2.532504000 | 4.192826000  | -0.817886000 |
| H | -3.399400000 | 4.788878000  | -1.089345000 |
| C | -2.222654000 | 3.058570000  | -1.545975000 |
| H | -2.845032000 | 2.770998000  | -2.389261000 |
| C | 1.431788000  | 2.043649000  | 1.511722000  |
| H | 1.888095000  | 3.032120000  | 1.655217000  |
| H | 2.206587000  | 1.289435000  | 1.674946000  |
| H | 0.637259000  | 1.915499000  | 2.251149000  |
| C | 1.995568000  | 2.134112000  | -0.820313000 |
| H | 1.623818000  | 2.078404000  | -1.843196000 |
| H | 2.786462000  | 1.393807000  | -0.677503000 |
| H | 2.407256000  | 3.138732000  | -0.657479000 |
| C | -1.887763000 | 0.096148000  | 2.083891000  |
| C | -2.784965000 | 0.033936000  | 0.975763000  |
| C | -2.590572000 | -1.212181000 | 0.289038000  |
| C | -1.575565000 | -1.925015000 | 1.024514000  |
| C | -1.144428000 | -1.119393000 | 2.117322000  |
| C | -3.845553000 | 1.065957000  | 0.724755000  |
| H | -4.090812000 | 1.172124000  | -0.331307000 |
| H | -3.548470000 | 2.049641000  | 1.098200000  |
| H | -4.768124000 | 0.784887000  | 1.251078000  |
| C | -1.196403000 | -3.368611000 | 0.831075000  |
| H | -0.167851000 | -3.590395000 | 1.134093000  |
| H | -1.315110000 | -3.700774000 | -0.202974000 |
| H | -1.842667000 | -4.008340000 | 1.445944000  |
| C | -0.195955000 | -1.521803000 | 3.211533000  |
| H | -0.751296000 | -1.782387000 | 4.122065000  |
| H | 0.500484000  | -0.720944000 | 3.487642000  |
| H | 0.395039000  | -2.403141000 | 2.944831000  |
| C | -1.872959000 | 1.165489000  | 3.140024000  |
| H | -2.739004000 | 1.055169000  | 3.805937000  |
| H | -0.981677000 | 1.103547000  | 3.773141000  |
| H | -1.922654000 | 2.175721000  | 2.719356000  |
| C | 6.016964000  | -0.567574000 | 0.668746000  |
| C | 5.224055000  | -1.007343000 | 1.725756000  |
| C | 3.905006000  | -1.393157000 | 1.503394000  |
| C | 3.352427000  | -1.332883000 | 0.213098000  |
| C | 4.158374000  | -0.902611000 | -0.855524000 |
| C | 5.474323000  | -0.523081000 | -0.618987000 |
| H | 5.645208000  | -1.059343000 | 2.725424000  |
| H | 3.299412000  | -1.753438000 | 2.331409000  |
| H | 3.779358000  | -0.892385000 | -1.872378000 |
| C | 1.966326000  | -1.761712000 | 0.018146000  |

|    |              |              |              |
|----|--------------|--------------|--------------|
| C  | 1.191611000  | -1.590300000 | -1.077943000 |
| H  | 1.537767000  | -2.302824000 | 0.861058000  |
| H  | 0.233953000  | -2.108221000 | -1.158303000 |
| H  | 1.551819000  | -1.103675000 | -1.980382000 |
| Si | -3.605218000 | -1.970130000 | -1.151913000 |
| C  | -4.613066000 | -3.414822000 | -0.452970000 |
| H  | -5.243449000 | -3.845723000 | -1.239870000 |
| H  | -3.980782000 | -4.217060000 | -0.058977000 |
| H  | -5.271349000 | -3.076527000 | 0.355010000  |
| C  | -2.463892000 | -2.586833000 | -2.543846000 |
| H  | -1.837564000 | -3.439980000 | -2.262482000 |
| H  | -3.084471000 | -2.915125000 | -3.386609000 |
| H  | -1.815198000 | -1.783088000 | -2.911313000 |
| C  | -4.804501000 | -0.737794000 | -1.944907000 |
| H  | -5.571257000 | -0.385152000 | -1.248619000 |
| H  | -4.297305000 | 0.130945000  | -2.378339000 |
| H  | -5.319753000 | -1.254809000 | -2.763765000 |
| H  | 7.049536000  | -0.275327000 | 0.830250000  |
| Cl | 6.461026000  | 0.001717000  | -1.945971000 |

***m*TS1<sup>b</sup>**,  $E_{(\text{SCF Done})} = -1979.683706$  a.u.  $\text{IF} = i297.43$   $\text{cm}^{-1}$

|    |              |              |              |
|----|--------------|--------------|--------------|
| Sc | -0.095249000 | -0.186124000 | 0.181129000  |
| N  | 1.087219000  | 1.589662000  | 1.133023000  |
| C  | 0.354429000  | 1.262857000  | -1.709776000 |
| H  | 1.406439000  | 1.541176000  | -1.750207000 |
| H  | -0.081881000 | 1.380080000  | -2.700069000 |
| C  | -0.394925000 | 2.144086000  | -0.755886000 |
| C  | -0.011202000 | 2.372097000  | 0.596255000  |
| C  | -0.683260000 | 3.328065000  | 1.373038000  |
| H  | -0.365470000 | 3.516422000  | 2.392863000  |
| C  | -1.736112000 | 4.057759000  | 0.843580000  |
| H  | -2.228776000 | 4.811277000  | 1.450920000  |
| C  | -2.157570000 | 3.819986000  | -0.469149000 |
| H  | -2.979828000 | 4.389738000  | -0.891938000 |
| C  | -1.509108000 | 2.869083000  | -1.238083000 |
| H  | -1.818819000 | 2.710326000  | -2.267368000 |
| C  | 1.099059000  | 1.465293000  | 2.604674000  |
| H  | 1.411134000  | 2.399814000  | 3.088899000  |
| H  | 1.819059000  | 0.688510000  | 2.876477000  |
| H  | 0.111887000  | 1.184411000  | 2.972170000  |
| C  | 2.416515000  | 2.106851000  | 0.718666000  |
| H  | 2.465561000  | 2.258581000  | -0.356997000 |
| H  | 3.185450000  | 1.388459000  | 1.007820000  |
| H  | 2.604265000  | 3.068399000  | 1.213795000  |

|    |              |              |              |
|----|--------------|--------------|--------------|
| C  | -1.338354000 | -1.185414000 | 2.105152000  |
| C  | -2.236468000 | -0.369671000 | 1.360820000  |
| C  | -2.407254000 | -0.950294000 | 0.049524000  |
| C  | -1.619793000 | -2.155053000 | 0.035816000  |
| C  | -0.948863000 | -2.283617000 | 1.278149000  |
| C  | -3.004072000 | 0.785386000  | 1.938267000  |
| H  | -3.197860000 | 1.570133000  | 1.205735000  |
| H  | -2.481364000 | 1.245436000  | 2.782681000  |
| H  | -3.975857000 | 0.442723000  | 2.317681000  |
| C  | -1.621133000 | -3.212960000 | -1.030737000 |
| H  | -0.665302000 | -3.742497000 | -1.108518000 |
| H  | -1.862669000 | -2.818150000 | -2.020824000 |
| H  | -2.374116000 | -3.976748000 | -0.797480000 |
| C  | -0.141676000 | -3.462337000 | 1.736008000  |
| H  | -0.795506000 | -4.214741000 | 2.197869000  |
| H  | 0.603681000  | -3.188049000 | 2.490102000  |
| H  | 0.376997000  | -3.963435000 | 0.912091000  |
| C  | -1.030946000 | -1.093491000 | 3.574242000  |
| H  | -1.599661000 | -1.858322000 | 4.119304000  |
| H  | 0.026659000  | -1.267770000 | 3.804398000  |
| H  | -1.317162000 | -0.129902000 | 4.004958000  |
| C  | 5.355547000  | -0.970462000 | 0.382231000  |
| C  | 4.467214000  | -1.844267000 | 1.009325000  |
| C  | 3.165167000  | -1.994166000 | 0.542761000  |
| C  | 2.704753000  | -1.275173000 | -0.580653000 |
| C  | 3.608653000  | -0.399542000 | -1.210630000 |
| C  | 4.908440000  | -0.260799000 | -0.731114000 |
| H  | 4.803391000  | -2.421827000 | 1.866307000  |
| H  | 2.499913000  | -2.702527000 | 1.029069000  |
| H  | 3.327093000  | 0.148385000  | -2.104187000 |
| C  | 1.323887000  | -1.465542000 | -1.053887000 |
| C  | 0.750231000  | -0.690759000 | -2.102527000 |
| H  | 0.890083000  | -2.441528000 | -0.864501000 |
| H  | -0.195950000 | -1.058860000 | -2.500975000 |
| H  | 1.380211000  | -0.286507000 | -2.891614000 |
| Si | -3.800062000 | -0.616480000 | -1.228700000 |
| C  | -4.966699000 | -2.109749000 | -1.189477000 |
| H  | -5.833204000 | -1.916604000 | -1.833197000 |
| H  | -4.492669000 | -3.030642000 | -1.542106000 |
| H  | -5.339027000 | -2.287643000 | -0.174380000 |
| C  | -3.127496000 | -0.392647000 | -2.994144000 |
| H  | -2.627632000 | -1.283011000 | -3.390001000 |
| H  | -3.967244000 | -0.175525000 | -3.665545000 |
| H  | -2.430809000 | 0.449970000  | -3.064037000 |

|    |              |              |              |
|----|--------------|--------------|--------------|
| C  | -4.841043000 | 0.914419000  | -0.830851000 |
| H  | -5.343470000 | 0.837519000  | 0.138139000  |
| H  | -4.267907000 | 1.845796000  | -0.852033000 |
| H  | -5.621812000 | 0.989596000  | -1.597893000 |
| H  | 6.373854000  | -0.851019000 | 0.736501000  |
| Cl | 5.994197000  | 0.829446000  | -1.545679000 |

**mP1<sup>b</sup>**,  $E_{(\text{SCF Done})} = -1979.705747$  a.u.

|    |              |              |              |
|----|--------------|--------------|--------------|
| Sc | -0.285756000 | -0.300865000 | 0.287016000  |
| N  | 0.778597000  | 1.208412000  | 1.712228000  |
| C  | 1.101332000  | 1.736046000  | -1.323630000 |
| H  | 2.104920000  | 1.786513000  | -0.901161000 |
| H  | 1.126346000  | 2.392465000  | -2.197802000 |
| C  | 0.069731000  | 2.367349000  | -0.383104000 |
| C  | -0.033649000 | 2.205590000  | 1.031014000  |
| C  | -0.974769000 | 2.961605000  | 1.751703000  |
| H  | -1.037405000 | 2.859458000  | 2.828697000  |
| C  | -1.814206000 | 3.868963000  | 1.119519000  |
| H  | -2.515664000 | 4.452276000  | 1.708701000  |
| C  | -1.737947000 | 4.030734000  | -0.261983000 |
| H  | -2.382739000 | 4.739275000  | -0.773033000 |
| C  | -0.809544000 | 3.291976000  | -0.981371000 |
| H  | -0.728235000 | 3.450078000  | -2.053732000 |
| C  | 0.338189000  | 0.872121000  | 3.082528000  |
| H  | 0.526177000  | 1.694921000  | 3.784996000  |
| H  | 0.912218000  | 0.004605000  | 3.416960000  |
| H  | -0.724851000 | 0.623366000  | 3.103207000  |
| C  | 2.224140000  | 1.546782000  | 1.791540000  |
| H  | 2.624661000  | 1.831964000  | 0.824541000  |
| H  | 2.773640000  | 0.670374000  | 2.140360000  |
| H  | 2.364584000  | 2.378573000  | 2.493435000  |
| C  | -1.458884000 | -1.984388000 | 1.622943000  |
| C  | -2.409252000 | -0.993311000 | 1.239975000  |
| C  | -2.547312000 | -1.017601000 | -0.195680000 |
| C  | -1.697606000 | -2.081752000 | -0.665562000 |
| C  | -1.021493000 | -2.658601000 | 0.437951000  |
| C  | -3.214216000 | -0.161803000 | 2.201964000  |
| H  | -3.285872000 | 0.888463000  | 1.906052000  |
| H  | -2.805938000 | -0.200905000 | 3.216789000  |
| H  | -4.239296000 | -0.546374000 | 2.270920000  |
| C  | -1.605144000 | -2.611263000 | -2.067692000 |
| H  | -0.596000000 | -2.956608000 | -2.317176000 |
| H  | -1.900981000 | -1.873954000 | -2.817461000 |
| H  | -2.268533000 | -3.477933000 | -2.187187000 |



|    |              |              |              |
|----|--------------|--------------|--------------|
| C  | -0.141569000 | -3.872562000 | 0.397249000  |
| H  | -0.753047000 | -4.784653000 | 0.373069000  |
| H  | 0.501412000  | -3.945879000 | 1.279717000  |
| H  | 0.501513000  | -3.894386000 | -0.488419000 |
| C  | -1.084011000 | -2.400649000 | 3.018987000  |
| H  | -1.592937000 | -3.335963000 | 3.285205000  |
| H  | -0.009028000 | -2.587541000 | 3.129212000  |
| H  | -1.371007000 | -1.660738000 | 3.770984000  |
| C  | 5.464318000  | -1.025919000 | 0.340112000  |
| C  | 4.482907000  | -1.833982000 | 0.914237000  |
| C  | 3.162297000  | -1.768678000 | 0.479206000  |
| C  | 2.773633000  | -0.903140000 | -0.561753000 |
| C  | 3.774865000  | -0.116094000 | -1.155013000 |
| C  | 5.091186000  | -0.176392000 | -0.697342000 |
| H  | 4.757212000  | -2.520394000 | 1.711224000  |
| H  | 2.414665000  | -2.414919000 | 0.934531000  |
| H  | 3.554205000  | 0.520812000  | -2.006032000 |
| C  | 1.347884000  | -0.882802000 | -1.002572000 |
| C  | 0.862633000  | 0.289584000  | -1.866911000 |
| H  | 1.096499000  | -1.821822000 | -1.506807000 |
| H  | -0.227865000 | 0.169791000  | -2.071229000 |
| H  | 1.287009000  | 0.252019000  | -2.880009000 |
| Si | -3.900685000 | -0.192196000 | -1.279337000 |
| C  | -5.065419000 | -1.568411000 | -1.857063000 |
| H  | -5.887470000 | -1.143582000 | -2.445084000 |
| H  | -4.555017000 | -2.306900000 | -2.483325000 |
| H  | -5.502598000 | -2.095730000 | -1.001935000 |
| C  | -3.162459000 | 0.703937000  | -2.785139000 |
| H  | -2.581105000 | 0.057964000  | -3.450864000 |
| H  | -3.982986000 | 1.121998000  | -3.381289000 |
| H  | -2.528359000 | 1.542667000  | -2.475499000 |
| C  | -4.911417000 | 1.100686000  | -0.333273000 |
| H  | -5.456749000 | 0.679268000  | 0.516236000  |
| H  | -4.301748000 | 1.937707000  | 0.023724000  |
| H  | -5.656597000 | 1.512495000  | -1.025205000 |
| H  | 6.494613000  | -1.062526000 | 0.677538000  |
| Cl | 6.293373000  | 0.829744000  | -1.457652000 |

$mC2^b_{syn}, E_{(SCF Done)} = -2748.794703$  a.u.

|   |              |             |              |
|---|--------------|-------------|--------------|
| N | -5.868299000 | 0.578071000 | 1.603505000  |
| C | -3.790828000 | 2.124452000 | 0.284287000  |
| H | -4.305062000 | 2.642138000 | 1.098359000  |
| H | -3.418354000 | 2.898757000 | -0.398569000 |
| C | -4.724805000 | 1.207247000 | -0.468486000 |

|   |              |              |              |
|---|--------------|--------------|--------------|
| C | -5.687993000 | 0.413030000  | 0.197853000  |
| C | -6.425262000 | -0.523886000 | -0.537811000 |
| H | -7.167196000 | -1.137321000 | -0.035227000 |
| C | -6.240603000 | -0.672577000 | -1.912056000 |
| H | -6.832900000 | -1.402176000 | -2.458426000 |
| C | -5.325616000 | 0.135146000  | -2.579985000 |
| H | -5.193972000 | 0.049926000  | -3.655374000 |
| C | -4.581316000 | 1.064734000  | -1.852419000 |
| H | -3.862819000 | 1.698704000  | -2.369423000 |
| C | -6.333121000 | -0.592752000 | 2.328924000  |
| H | -7.399737000 | -0.827635000 | 2.163172000  |
| H | -6.202751000 | -0.415283000 | 3.402676000  |
| H | -5.740768000 | -1.469136000 | 2.049320000  |
| C | -6.674668000 | 1.746613000  | 1.956754000  |
| H | -6.349460000 | 2.625962000  | 1.396450000  |
| H | -6.565373000 | 1.957022000  | 3.026834000  |
| H | -7.746213000 | 1.590817000  | 1.742529000  |
| C | -1.306851000 | -2.378714000 | 0.397200000  |
| C | -0.479825000 | -2.526245000 | -0.754419000 |
| C | 0.886811000  | -2.706022000 | -0.336106000 |
| C | 0.875192000  | -2.680126000 | 1.100945000  |
| C | -0.462745000 | -2.449752000 | 1.545056000  |
| C | -1.011453000 | -2.602982000 | -2.159480000 |
| H | -0.246291000 | -2.387080000 | -2.910102000 |
| H | -1.852018000 | -1.920099000 | -2.326783000 |
| H | -1.385746000 | -3.614278000 | -2.365841000 |
| C | 2.014238000  | -3.032710000 | 2.016615000  |
| H | 1.799101000  | -2.757915000 | 3.053744000  |
| H | 2.961222000  | -2.572178000 | 1.726725000  |
| H | 2.171106000  | -4.118875000 | 2.012332000  |
| C | -0.939356000 | -2.412516000 | 2.969703000  |
| H | -1.209457000 | -3.419954000 | 3.312942000  |
| H | -1.830731000 | -1.787534000 | 3.087360000  |
| H | -0.176721000 | -2.036948000 | 3.659862000  |
| C | -2.804666000 | -2.342315000 | 0.411027000  |
| H | -3.201049000 | -3.365146000 | 0.468197000  |
| H | -3.197749000 | -1.795078000 | 1.272153000  |
| H | -3.227816000 | -1.884648000 | -0.487532000 |
| C | 0.219406000  | 0.996344000  | -1.740259000 |
| C | -0.658884000 | 1.617700000  | -0.797929000 |
| C | -0.345948000 | 2.951336000  | -0.423161000 |
| C | 0.735254000  | 3.609915000  | -0.987859000 |
| C | 1.589809000  | 2.990777000  | -1.918014000 |
| C | 1.313325000  | 1.687161000  | -2.293525000 |

|    |              |              |              |
|----|--------------|--------------|--------------|
| H  | -0.080429000 | 0.046641000  | -2.197213000 |
| H  | -0.981826000 | 3.481453000  | 0.277679000  |
| H  | 1.929602000  | 1.201898000  | -3.044810000 |
| C  | -1.627857000 | 0.779355000  | -0.117333000 |
| C  | -2.589124000 | 1.361864000  | 0.899169000  |
| H  | -2.115114000 | 0.079486000  | -0.806978000 |
| H  | -2.057553000 | 2.042118000  | 1.580698000  |
| H  | -2.998805000 | 0.564565000  | 1.530422000  |
| C  | 4.633847000  | -0.264182000 | 2.543309000  |
| C  | 3.614822000  | 0.495055000  | 1.942588000  |
| C  | 3.947147000  | 1.399140000  | 0.916943000  |
| C  | 5.269843000  | 1.522248000  | 0.512814000  |
| C  | 6.283267000  | 0.769520000  | 1.115313000  |
| C  | 5.956308000  | -0.120636000 | 2.134483000  |
| H  | 4.387729000  | -0.954692000 | 3.345695000  |
| H  | 3.190038000  | 2.010861000  | 0.436351000  |
| H  | 6.739794000  | -0.702097000 | 2.611001000  |
| C  | 2.250080000  | 0.327988000  | 2.434745000  |
| C  | 1.140206000  | 1.032033000  | 2.092971000  |
| H  | 2.135849000  | -0.447059000 | 3.191224000  |
| H  | 0.213870000  | 0.884129000  | 2.651560000  |
| H  | 1.179064000  | 1.909812000  | 1.448991000  |
| Sc | 0.209274000  | -0.463730000 | 0.276978000  |
| Si | 2.311063000  | -3.212613000 | -1.521918000 |
| C  | 1.781625000  | -4.796505000 | -2.413252000 |
| H  | 0.910434000  | -4.649022000 | -3.058964000 |
| H  | 2.603857000  | -5.157429000 | -3.042423000 |
| H  | 1.539539000  | -5.587073000 | -1.694248000 |
| C  | 3.937915000  | -3.553425000 | -0.614183000 |
| H  | 3.854541000  | -4.360412000 | 0.119875000  |
| H  | 4.673244000  | -3.870025000 | -1.364284000 |
| H  | 4.344773000  | -2.667077000 | -0.115705000 |
| C  | 2.671583000  | -1.837432000 | -2.783361000 |
| H  | 1.797078000  | -1.543841000 | -3.373878000 |
| H  | 3.076830000  | -0.944822000 | -2.291681000 |
| H  | 3.433196000  | -2.190340000 | -3.489295000 |
| H  | 2.422339000  | 3.538827000  | -2.344709000 |
| H  | 7.310851000  | 0.887860000  | 0.787080000  |
| Cl | 1.048607000  | 5.255900000  | -0.537491000 |
| Cl | 5.677379000  | 2.632885000  | -0.757943000 |

$mTS2^b_{syn}$ ,  $E_{(SCF Done)} = -2748.783305$  a.u. IF =  $i139.19$   $cm^{-1}$

|   |             |              |              |
|---|-------------|--------------|--------------|
| N | 5.555332000 | -0.319000000 | -1.488583000 |
| C | 3.865856000 | 1.772952000  | -0.364682000 |

|   |               |               |               |
|---|---------------|---------------|---------------|
| H | 4. 601434000  | 2. 243855000  | -1. 025374000 |
| H | 3. 499219000  | 2. 567616000  | 0. 296817000  |
| C | 4. 499499000  | 0. 690330000  | 0. 479127000  |
| C | 5. 283173000  | -0. 343215000 | -0. 087355000 |
| C | 5. 765944000  | -1. 364590000 | 0. 741729000  |
| H | 6. 370455000  | -2. 159822000 | 0. 315691000  |
| C | 5. 511467000  | -1. 365765000 | 2. 112664000  |
| H | 5. 911950000  | -2. 162966000 | 2. 733580000  |
| C | 4. 776060000  | -0. 330423000 | 2. 681520000  |
| H | 4. 595850000  | -0. 303603000 | 3. 752899000  |
| C | 4. 278451000  | 0. 681685000  | 1. 860214000  |
| H | 3. 702748000  | 1. 493642000  | 2. 301202000  |
| C | 5. 746978000  | -1. 614195000 | -2. 121882000 |
| H | 6. 712737000  | -2. 092354000 | -1. 880852000 |
| H | 5. 712241000  | -1. 482325000 | -3. 209238000 |
| H | 4. 943036000  | -2. 297858000 | -1. 831679000 |
| C | 6. 638799000  | 0. 593437000  | -1. 857235000 |
| H | 6. 515494000  | 1. 560920000  | -1. 365800000 |
| H | 6. 630629000  | 0. 752294000  | -2. 941420000 |
| H | 7. 628576000  | 0. 197204000  | -1. 572565000 |
| C | 0. 519227000  | -2. 449086000 | 0. 574490000  |
| C | -0. 633608000 | -2. 194342000 | 1. 370370000  |
| C | -1. 809243000 | -2. 341677000 | 0. 551747000  |
| C | -1. 345381000 | -2. 725164000 | -0. 755355000 |
| C | 0. 079561000  | -2. 761885000 | -0. 744956000 |
| C | -0. 600611000 | -2. 021445000 | 2. 863560000  |
| H | -1. 423198000 | -1. 406478000 | 3. 238055000  |
| H | 0. 338988000  | -1. 581187000 | 3. 214476000  |
| H | -0. 679391000 | -3. 000143000 | 3. 353738000  |
| C | -2. 183989000 | -3. 214929000 | -1. 898910000 |
| H | -1. 655907000 | -3. 147591000 | -2. 855354000 |
| H | -3. 127643000 | -2. 676372000 | -1. 989421000 |
| H | -2. 425690000 | -4. 276115000 | -1. 753683000 |
| C | 0. 966871000  | -3. 194585000 | -1. 875886000 |
| H | 1. 124627000  | -4. 280933000 | -1. 847182000 |
| H | 1. 955434000  | -2. 727290000 | -1. 826305000 |
| H | 0. 540056000  | -2. 963258000 | -2. 856966000 |
| C | 1. 930788000  | -2. 545146000 | 1. 076479000  |
| H | 2. 110968000  | -3. 544543000 | 1. 494711000  |
| H | 2. 670710000  | -2. 394809000 | 0. 285224000  |
| H | 2. 157695000  | -1. 825358000 | 1. 869606000  |
| C | 0. 185146000  | 1. 078334000  | 1. 584604000  |
| C | 0. 804061000  | 1. 628882000  | 0. 429788000  |
| C | 0. 572878000  | 3. 000280000  | 0. 149216000  |

|    |              |              |              |
|----|--------------|--------------|--------------|
| C  | -0.232008000 | 3.756395000  | 0.986897000  |
| C  | -0.878511000 | 3.194457000  | 2.102652000  |
| C  | -0.659247000 | 1.859453000  | 2.393886000  |
| H  | 0.528097000  | 0.116885000  | 1.958954000  |
| H  | 1.052099000  | 3.476858000  | -0.699719000 |
| H  | -1.102853000 | 1.424444000  | 3.284934000  |
| C  | 1.517309000  | 0.750686000  | -0.486663000 |
| C  | 2.710382000  | 1.277693000  | -1.262082000 |
| H  | 1.768394000  | -0.211658000 | -0.012508000 |
| H  | 2.411284000  | 2.105590000  | -1.919846000 |
| H  | 3.109789000  | 0.491553000  | -1.911607000 |
| C  | -3.363151000 | -0.149262000 | -2.908499000 |
| C  | -2.217074000 | 0.392090000  | -2.286217000 |
| C  | -2.399750000 | 1.396708000  | -1.306048000 |
| C  | -3.692053000 | 1.854680000  | -1.004075000 |
| C  | -4.808595000 | 1.324871000  | -1.636277000 |
| C  | -4.627664000 | 0.324252000  | -2.597846000 |
| H  | -3.239736000 | -0.906034000 | -3.676913000 |
| H  | -1.551338000 | 1.945248000  | -0.886656000 |
| H  | -5.495075000 | -0.077213000 | -3.114467000 |
| C  | -0.886544000 | -0.109131000 | -2.623064000 |
| C  | 0.282852000  | 0.630788000  | -2.469236000 |
| H  | -0.840042000 | -1.047555000 | -3.167344000 |
| H  | 1.182900000  | 0.262691000  | -2.947405000 |
| H  | 0.229739000  | 1.709686000  | -2.344869000 |
| Sc | -0.597207000 | -0.427441000 | -0.318122000 |
| Si | -3.590823000 | -2.386768000 | 1.269374000  |
| C  | -3.662343000 | -3.786078000 | 2.545692000  |
| H  | -3.030465000 | -3.601438000 | 3.419766000  |
| H  | -4.692841000 | -3.901517000 | 2.902523000  |
| H  | -3.356009000 | -4.739463000 | 2.100725000  |
| C  | -4.913710000 | -2.738052000 | -0.038202000 |
| H  | -4.780332000 | -3.710078000 | -0.522783000 |
| H  | -5.884169000 | -2.758941000 | 0.473107000  |
| H  | -4.967536000 | -1.963962000 | -0.810060000 |
| C  | -4.028264000 | -0.732934000 | 2.094580000  |
| H  | -3.394399000 | -0.498996000 | 2.956081000  |
| H  | -3.970130000 | 0.103225000  | 1.388687000  |
| H  | -5.061503000 | -0.778429000 | 2.459861000  |
| H  | -1.506453000 | 3.813335000  | 2.733756000  |
| H  | -5.798748000 | 1.697592000  | -1.396836000 |
| Cl | -0.456789000 | 5.439908000  | 0.651625000  |
| Cl | -3.899533000 | 3.137931000  | 0.143281000  |

$mP2^b_{\text{syn}}, E_{(\text{SCF Done})} = -2748.818285 \text{ a.u.}$

|   |              |              |              |
|---|--------------|--------------|--------------|
| N | 6.030175000  | -0.120248000 | -1.182408000 |
| C | 4.357681000  | 1.572079000  | 0.525943000  |
| H | 5.263315000  | 2.163172000  | 0.350336000  |
| H | 3.874060000  | 2.025018000  | 1.401308000  |
| C | 4.693305000  | 0.133054000  | 0.856222000  |
| C | 5.458217000  | -0.688066000 | -0.008098000 |
| C | 5.621279000  | -2.043915000 | 0.307903000  |
| H | 6.203374000  | -2.680127000 | -0.351987000 |
| C | 5.077820000  | -2.589466000 | 1.469801000  |
| H | 5.236507000  | -3.640807000 | 1.696052000  |
| C | 4.370506000  | -1.776440000 | 2.350243000  |
| H | 3.975080000  | -2.178854000 | 3.279444000  |
| C | 4.185533000  | -0.430408000 | 2.031671000  |
| H | 3.629403000  | 0.208734000  | 2.715674000  |
| C | 6.222966000  | -1.023354000 | -2.304924000 |
| H | 7.066543000  | -1.724497000 | -2.175741000 |
| H | 6.428564000  | -0.428753000 | -3.202145000 |
| H | 5.312406000  | -1.604688000 | -2.479313000 |
| C | 7.239985000  | 0.662972000  | -0.934909000 |
| H | 7.103098000  | 1.328990000  | -0.080489000 |
| H | 7.467371000  | 1.273440000  | -1.815957000 |
| H | 8.112568000  | 0.021108000  | -0.723558000 |
| C | -0.418738000 | -2.757060000 | -0.115257000 |
| C | -1.269083000 | -2.422516000 | 0.977738000  |
| C | -2.563957000 | -2.056370000 | 0.467197000  |
| C | -2.496542000 | -2.219574000 | -0.962084000 |
| C | -1.179980000 | -2.642173000 | -1.315623000 |
| C | -0.892875000 | -2.607452000 | 2.421636000  |
| H | -1.559045000 | -2.067345000 | 3.098261000  |
| H | 0.137341000  | -2.303284000 | 2.639766000  |
| H | -0.962761000 | -3.670047000 | 2.688775000  |
| C | -3.642927000 | -2.131911000 | -1.930478000 |
| H | -3.292159000 | -2.151502000 | -2.964547000 |
| H | -4.246321000 | -1.229947000 | -1.803735000 |
| H | -4.310534000 | -2.992926000 | -1.799938000 |
| C | -0.716471000 | -3.076613000 | -2.673743000 |
| H | -0.961444000 | -4.134807000 | -2.835425000 |
| H | 0.366922000  | -2.976256000 | -2.787953000 |
| H | -1.191008000 | -2.511942000 | -3.481392000 |
| C | 0.992440000  | -3.261726000 | -0.025239000 |
| H | 1.006798000  | -4.359945000 | -0.031485000 |
| H | 1.603797000  | -2.930003000 | -0.870641000 |
| H | 1.498648000  | -2.944489000 | 0.891956000  |

|    |              |              |              |
|----|--------------|--------------|--------------|
| C  | 0.651750000  | 0.471313000  | 1.370996000  |
| C  | 1.240351000  | 1.430613000  | 0.523219000  |
| C  | 0.931979000  | 2.779959000  | 0.746494000  |
| C  | 0.059935000  | 3.150051000  | 1.770742000  |
| C  | -0.545974000 | 2.193356000  | 2.593212000  |
| C  | -0.232646000 | 0.852970000  | 2.396511000  |
| H  | 1.001100000  | -0.563018000 | 1.315019000  |
| H  | 1.375936000  | 3.553650000  | 0.127718000  |
| H  | -0.643621000 | 0.103869000  | 3.065441000  |
| C  | 2.107876000  | 1.006744000  | -0.641944000 |
| C  | 3.456299000  | 1.740622000  | -0.710012000 |
| H  | 2.319687000  | -0.065355000 | -0.525246000 |
| H  | 3.291436000  | 2.812764000  | -0.886954000 |
| H  | 3.998308000  | 1.360503000  | -1.582291000 |
| C  | -2.027933000 | 0.470641000  | -3.550847000 |
| C  | -1.201086000 | 0.855243000  | -2.467323000 |
| C  | -1.794667000 | 1.701384000  | -1.482564000 |
| C  | -3.113501000 | 2.170210000  | -1.625428000 |
| C  | -3.888188000 | 1.800834000  | -2.713792000 |
| C  | -3.321511000 | 0.952406000  | -3.676161000 |
| H  | -1.611472000 | -0.170350000 | -4.322769000 |
| H  | -1.168866000 | 2.156183000  | -0.707636000 |
| H  | -3.914483000 | 0.674342000  | -4.543563000 |
| C  | 0.104336000  | 0.257373000  | -2.195723000 |
| C  | 1.307324000  | 1.194231000  | -1.954110000 |
| H  | 0.346139000  | -0.516776000 | -2.925688000 |
| H  | 2.011675000  | 1.054833000  | -2.784766000 |
| H  | 0.983200000  | 2.242687000  | -2.015489000 |
| Sc | -1.027326000 | -0.394800000 | -0.345243000 |
| Si | -4.113614000 | -1.731903000 | 1.556852000  |
| C  | -4.466043000 | -3.313358000 | 2.535653000  |
| H  | -3.636260000 | -3.596740000 | 3.190809000  |
| H  | -5.354312000 | -3.173857000 | 3.163012000  |
| H  | -4.662734000 | -4.152780000 | 1.859492000  |
| C  | -5.646620000 | -1.286768000 | 0.540119000  |
| H  | -5.948726000 | -2.081131000 | -0.148106000 |
| H  | -6.474322000 | -1.128907000 | 1.242553000  |
| H  | -5.523870000 | -0.359256000 | -0.029638000 |
| C  | -3.827212000 | -0.275887000 | 2.747894000  |
| H  | -3.049419000 | -0.460573000 | 3.496012000  |
| H  | -3.584297000 | 0.649945000  | 2.211986000  |
| H  | -4.758854000 | -0.090716000 | 3.296510000  |
| H  | -1.218213000 | 2.502073000  | 3.386604000  |
| H  | -4.899794000 | 2.176596000  | -2.823049000 |

|    |              |             |              |
|----|--------------|-------------|--------------|
| Cl | -0.283312000 | 4.824214000 | 2.026945000  |
| Cl | -3.757236000 | 3.246548000 | -0.424343000 |

$mC2^b_{iso}, E_{(SCF Done)} = -2748.799331 \text{ a.u.}$

|    |              |              |              |
|----|--------------|--------------|--------------|
| Sc | 1.171642000  | 0.087191000  | 0.427876000  |
| C  | -1.698849000 | -2.515771000 | 1.681537000  |
| C  | 1.077083000  | 1.209379000  | 3.814692000  |
| C  | 1.690025000  | 1.388593000  | 2.457958000  |
| C  | 1.235394000  | 2.310596000  | 1.468205000  |
| C  | 2.167578000  | 2.292436000  | 0.390640000  |
| C  | 3.194749000  | 1.322945000  | 0.684487000  |
| C  | 2.897814000  | 0.798279000  | 1.990610000  |
| C  | 0.065282000  | 3.237564000  | 1.633100000  |
| C  | 2.194744000  | 3.298748000  | -0.725016000 |
| C  | 3.759642000  | -0.106023000 | 2.820025000  |
| C  | -0.772856000 | -1.273064000 | 1.708052000  |
| C  | 0.705989000  | -1.567759000 | 1.818821000  |
| H  | -1.316029000 | -3.212784000 | 0.934681000  |
| H  | -1.592681000 | -3.011511000 | 2.653873000  |
| H  | -0.009430000 | 1.345439000  | 3.800179000  |
| H  | 1.479888000  | 1.952937000  | 4.515333000  |
| H  | 1.286132000  | 0.223651000  | 4.239524000  |
| H  | -0.772711000 | 2.760183000  | 2.152768000  |
| H  | -0.309863000 | 3.611783000  | 0.677555000  |
| H  | 0.354677000  | 4.110168000  | 2.233937000  |
| H  | 1.208389000  | 3.733208000  | -0.907386000 |
| H  | 2.570040000  | 2.887365000  | -1.666883000 |
| H  | 2.859354000  | 4.129051000  | -0.454019000 |
| H  | 4.315946000  | -0.825503000 | 2.218888000  |
| H  | 3.175462000  | -0.659038000 | 3.561611000  |
| H  | 4.494720000  | 0.490421000  | 3.376944000  |
| H  | -1.070747000 | -0.620424000 | 2.536969000  |
| H  | -1.027536000 | -0.691497000 | 0.783449000  |
| H  | 1.093138000  | -1.647464000 | 2.831242000  |
| C  | 0.893506000  | -2.411060000 | -0.514364000 |
| C  | 1.378831000  | -2.369187000 | 0.824504000  |
| C  | 2.659495000  | -2.944110000 | 1.064455000  |
| C  | 3.378937000  | -3.541964000 | 0.046908000  |
| C  | 2.898402000  | -3.575922000 | -1.273945000 |
| C  | 1.659708000  | -3.016539000 | -1.529064000 |
| H  | -0.148911000 | -2.180759000 | -0.728401000 |
| H  | 3.048572000  | -2.947042000 | 2.078198000  |
| C  | -1.477596000 | 3.842127000  | -2.158178000 |
| C  | -1.535472000 | 2.528334000  | -1.662310000 |



|    |              |              |              |
|----|--------------|--------------|--------------|
| C  | -2.662689000 | 2.124227000  | -0.924759000 |
| C  | -3.692370000 | 3.028262000  | -0.695340000 |
| C  | -3.635187000 | 4.333178000  | -1.195137000 |
| C  | -2.523223000 | 4.731857000  | -1.931068000 |
| H  | -0.615667000 | 4.158627000  | -2.740217000 |
| H  | -2.745693000 | 1.117915000  | -0.525481000 |
| H  | -2.474979000 | 5.741820000  | -2.327085000 |
| C  | -0.421181000 | 1.634336000  | -1.966405000 |
| C  | -0.332379000 | 0.294280000  | -1.777963000 |
| H  | 0.418959000  | 2.119796000  | -2.460333000 |
| H  | 0.488720000  | -0.250987000 | -2.245832000 |
| H  | -1.177295000 | -0.307557000 | -1.448316000 |
| Si | 4.713707000  | 1.020514000  | -0.448949000 |
| C  | 5.936255000  | -0.240752000 | 0.254787000  |
| H  | 6.346836000  | 0.064245000  | 1.222332000  |
| H  | 5.503227000  | -1.241197000 | 0.355887000  |
| H  | 6.776180000  | -0.318103000 | -0.446719000 |
| C  | 5.641148000  | 2.652829000  | -0.694374000 |
| H  | 6.568026000  | 2.462711000  | -1.248688000 |
| H  | 5.068010000  | 3.396875000  | -1.255080000 |
| H  | 5.916036000  | 3.092311000  | 0.271009000  |
| C  | 4.095792000  | 0.342920000  | -2.117498000 |
| H  | 4.945127000  | 0.198980000  | -2.796424000 |
| H  | 3.617943000  | -0.638604000 | -1.998415000 |
| H  | 3.391689000  | 1.012209000  | -2.625046000 |
| H  | -4.454167000 | 5.019439000  | -1.005752000 |
| H  | 3.466592000  | -4.050777000 | -2.066258000 |
| Cl | -5.074630000 | 2.533963000  | 0.229982000  |
| Cl | 0.997220000  | -3.086148000 | -3.138377000 |
| H  | 4.335700000  | -4.007072000 | 0.269668000  |
| C  | -3.146556000 | -2.166233000 | 1.441308000  |
| C  | -3.712262000 | -2.122853000 | 0.145873000  |
| C  | -3.942557000 | -1.814160000 | 2.535873000  |
| C  | -5.041079000 | -1.703977000 | 0.000139000  |
| C  | -5.263748000 | -1.400654000 | 2.382476000  |
| H  | -3.509970000 | -1.865479000 | 3.533798000  |
| C  | -5.809039000 | -1.338549000 | 1.104379000  |
| H  | -5.493742000 | -1.673106000 | -0.985834000 |
| H  | -5.857908000 | -1.133332000 | 3.251644000  |
| H  | -6.838623000 | -1.022519000 | 0.959912000  |
| N  | -2.915044000 | -2.513277000 | -0.982014000 |
| C  | -3.331780000 | -1.953618000 | -2.263329000 |
| H  | -2.545843000 | -2.144871000 | -3.001992000 |
| H  | -4.264173000 | -2.395011000 | -2.654648000 |

|   |              |              |              |
|---|--------------|--------------|--------------|
| H | -3.477134000 | -0.872405000 | -2.179320000 |
| C | -2.798856000 | -3.972295000 | -1.111381000 |
| H | -3.749590000 | -4.428665000 | -1.432837000 |
| H | -2.030358000 | -4.212299000 | -1.854044000 |
| H | -2.517583000 | -4.427637000 | -0.159882000 |

***mTS2***<sup>b</sup><sub>iso</sub>,  $E_{(\text{SCF Done})} = -2748.766641$  a.u.  $\text{IF} = i194.05 \text{ cm}^{-1}$

|    |              |              |              |
|----|--------------|--------------|--------------|
| Sc | 1.170689000  | 0.287320000  | 0.336356000  |
| C  | -2.848624000 | -1.952970000 | -0.113942000 |
| C  | 2.472967000  | 1.030264000  | 3.511288000  |
| C  | 2.764003000  | 0.982281000  | 2.037209000  |
| C  | 2.625538000  | 2.086858000  | 1.137255000  |
| C  | 3.117108000  | 1.681451000  | -0.134059000 |
| C  | 3.540331000  | 0.303944000  | -0.048750000 |
| C  | 3.361378000  | -0.096220000 | 1.321462000  |
| C  | 2.185536000  | 3.467853000  | 1.527149000  |
| C  | 3.344855000  | 2.607091000  | -1.291316000 |
| C  | 3.850740000  | -1.365592000 | 1.956090000  |
| C  | -2.294015000 | -0.920047000 | 0.880586000  |
| C  | -0.786276000 | -0.661730000 | 0.833944000  |
| H  | -2.504374000 | -1.721624000 | -1.126361000 |
| H  | -2.462681000 | -2.949078000 | 0.133450000  |
| H  | 1.635683000  | 1.695949000  | 3.746010000  |
| H  | 3.343107000  | 1.411402000  | 4.061877000  |
| H  | 2.241720000  | 0.043681000  | 3.923985000  |
| H  | 1.413595000  | 3.456545000  | 2.303369000  |
| H  | 1.791566000  | 4.032150000  | 0.678810000  |
| H  | 3.037172000  | 4.031018000  | 1.932073000  |
| H  | 2.642213000  | 3.443479000  | -1.287751000 |
| H  | 3.268051000  | 2.102593000  | -2.259112000 |
| H  | 4.353864000  | 3.035213000  | -1.231570000 |
| H  | 3.621993000  | -2.258155000 | 1.370206000  |
| H  | 3.431403000  | -1.504146000 | 2.955299000  |
| H  | 4.941521000  | -1.323368000 | 2.069852000  |
| H  | -2.556896000 | -1.251654000 | 1.895888000  |
| H  | -2.820219000 | 0.029464000  | 0.725714000  |
| H  | -0.590900000 | 0.067778000  | 1.667491000  |
| C  | 0.400285000  | -2.736767000 | -0.007373000 |
| C  | 0.072170000  | -1.880572000 | 1.064669000  |
| C  | 0.496753000  | -2.240051000 | 2.359013000  |
| C  | 1.173154000  | -3.437908000 | 2.580180000  |
| C  | 1.473945000  | -4.289337000 | 1.519402000  |
| C  | 1.091209000  | -3.925386000 | 0.227335000  |
| H  | 0.064874000  | -2.514369000 | -1.015706000 |

|    |              |              |              |
|----|--------------|--------------|--------------|
| H  | 0.239772000  | -1.602092000 | 3.201372000  |
| C  | 0.137071000  | 3.902640000  | -1.731275000 |
| C  | -0.282887000 | 2.771551000  | -1.009368000 |
| C  | -1.101402000 | 2.969050000  | 0.116768000  |
| C  | -1.462490000 | 4.256448000  | 0.508726000  |
| C  | -1.037562000 | 5.375297000  | -0.202571000 |
| C  | -0.241153000 | 5.180758000  | -1.331954000 |
| H  | 0.732324000  | 3.773239000  | -2.630978000 |
| H  | -1.483398000 | 2.124437000  | 0.684115000  |
| H  | 0.078889000  | 6.042304000  | -1.911538000 |
| C  | 0.092618000  | 1.410929000  | -1.439392000 |
| C  | -0.777946000 | 0.333951000  | -1.244386000 |
| H  | 0.864637000  | 1.323253000  | -2.204298000 |
| H  | -0.589609000 | -0.577391000 | -1.809743000 |
| H  | -1.826676000 | 0.499068000  | -1.011684000 |
| Si | 4.394848000  | -0.636642000 | -1.488752000 |
| C  | 4.971551000  | -2.372385000 | -1.005107000 |
| H  | 5.681750000  | -2.366241000 | -0.172772000 |
| H  | 4.146459000  | -3.047600000 | -0.756807000 |
| H  | 5.488649000  | -2.801043000 | -1.872524000 |
| C  | 5.910268000  | 0.348014000  | -2.053148000 |
| H  | 6.454665000  | -0.228379000 | -2.810603000 |
| H  | 5.653637000  | 1.315733000  | -2.493712000 |
| H  | 6.594276000  | 0.526247000  | -1.215889000 |
| C  | 3.165426000  | -0.835773000 | -2.929868000 |
| H  | 3.659030000  | -1.360232000 | -3.757032000 |
| H  | 2.299626000  | -1.447515000 | -2.643524000 |
| H  | 2.800555000  | 0.117799000  | -3.327062000 |
| H  | -1.331995000 | 6.370445000  | 0.113119000  |
| H  | 1.996443000  | -5.225755000 | 1.686394000  |
| Cl | -2.463135000 | 4.458231000  | 1.919219000  |
| Cl | 1.450133000  | -4.975856000 | -1.104008000 |
| H  | 1.467303000  | -3.716911000 | 3.588032000  |
| C  | -4.358546000 | -1.975921000 | -0.057940000 |
| C  | -5.124987000 | -0.956090000 | -0.659170000 |
| C  | -5.013383000 | -2.978658000 | 0.661681000  |
| C  | -6.514789000 | -0.961665000 | -0.502281000 |
| C  | -6.398808000 | -2.980287000 | 0.811467000  |
| H  | -4.422745000 | -3.768186000 | 1.122864000  |
| C  | -7.149587000 | -1.961229000 | 0.233241000  |
| H  | -7.112150000 | -0.180241000 | -0.962980000 |
| H  | -6.884833000 | -3.768760000 | 1.379207000  |
| H  | -8.230635000 | -1.945502000 | 0.342858000  |
| N  | -4.447700000 | 0.056651000  | -1.421723000 |

|   |              |              |              |
|---|--------------|--------------|--------------|
| C | -5.027942000 | 1.391305000  | -1.325313000 |
| H | -4.324344000 | 2.114985000  | -1.752520000 |
| H | -5.982630000 | 1.502740000  | -1.867286000 |
| H | -5.194230000 | 1.649026000  | -0.275486000 |
| C | -4.277346000 | -0.332115000 | -2.821924000 |
| H | -5.234143000 | -0.357109000 | -3.371145000 |
| H | -3.614675000 | 0.383516000  | -3.323340000 |
| H | -3.830023000 | -1.328269000 | -2.888044000 |

**mP2<sup>b</sup><sub>iso</sub>**,  $E_{(\text{SCF Done})} = -2748.80643$  a.u.

|    |              |              |              |
|----|--------------|--------------|--------------|
| Sc | 1.643033000  | 0.208648000  | 0.256473000  |
| C  | -3.812335000 | -0.598010000 | 0.114553000  |
| C  | 4.385811000  | 0.442094000  | 2.429123000  |
| C  | 3.934867000  | -0.024214000 | 1.073427000  |
| C  | 3.999668000  | 0.746767000  | -0.126325000 |
| C  | 3.546461000  | -0.072636000 | -1.200126000 |
| C  | 3.207266000  | -1.372650000 | -0.680688000 |
| C  | 3.476665000  | -1.330309000 | 0.733118000  |
| C  | 4.618628000  | 2.106305000  | -0.245668000 |
| C  | 3.586739000  | 0.330780000  | -2.644927000 |
| C  | 3.447629000  | -2.478966000 | 1.700151000  |
| C  | -3.169369000 | 0.736379000  | 0.518167000  |
| C  | -1.634418000 | 0.880837000  | 0.348186000  |
| H  | -3.551928000 | -0.834948000 | -0.922332000 |
| H  | -3.424155000 | -1.412659000 | 0.739597000  |
| H  | 4.184029000  | 1.506684000  | 2.589411000  |
| H  | 5.469129000  | 0.303454000  | 2.543703000  |
| H  | 3.908126000  | -0.114632000 | 3.241401000  |
| H  | 4.485635000  | 2.706474000  | 0.658935000  |
| H  | 4.215043000  | 2.673759000  | -1.086906000 |
| H  | 5.700062000  | 2.004841000  | -0.409181000 |
| H  | 3.433303000  | 1.406225000  | -2.767559000 |
| H  | 2.830211000  | -0.185684000 | -3.241768000 |
| H  | 4.566321000  | 0.094454000  | -3.079109000 |
| H  | 2.697384000  | -3.229159000 | 1.447628000  |
| H  | 3.267428000  | -2.145946000 | 2.727051000  |
| H  | 4.421347000  | -2.986458000 | 1.702510000  |
| H  | -3.424658000 | 0.950242000  | 1.564106000  |
| H  | -3.628918000 | 1.526373000  | -0.087042000 |
| H  | -1.421320000 | 1.903762000  | 0.684738000  |
| C  | -0.701755000 | -1.417043000 | 0.948399000  |
| C  | -0.863446000 | -0.052244000 | 1.264717000  |
| C  | -0.321005000 | 0.405363000  | 2.482457000  |
| C  | 0.311051000  | -0.473604000 | 3.371422000  |

|    |              |              |              |
|----|--------------|--------------|--------------|
| C  | 0.392549000  | -1.834529000 | 3.085577000  |
| C  | -0.129118000 | -2.296811000 | 1.874457000  |
| H  | -1.105957000 | -1.814376000 | 0.023221000  |
| H  | -0.456610000 | 1.444832000  | 2.773730000  |
| C  | 1.481108000  | 3.124591000  | -2.099630000 |
| C  | 0.919628000  | 2.301994000  | -1.092404000 |
| C  | 1.076598000  | 2.750892000  | 0.245609000  |
| C  | 1.715376000  | 3.967999000  | 0.539401000  |
| C  | 2.217174000  | 4.772773000  | -0.466873000 |
| C  | 2.085259000  | 4.333172000  | -1.793301000 |
| H  | 1.376764000  | 2.820152000  | -3.137314000 |
| H  | 0.551184000  | 2.271466000  | 1.071465000  |
| H  | 2.459847000  | 4.964233000  | -2.595136000 |
| C  | 0.334720000  | 0.978323000  | -1.381743000 |
| C  | -1.171507000 | 0.768005000  | -1.113608000 |
| H  | 0.549325000  | 0.696666000  | -2.416707000 |
| H  | -1.436784000 | -0.219232000 | -1.510199000 |
| H  | -1.765674000 | 1.486110000  | -1.698378000 |
| Si | 2.869361000  | -2.894481000 | -1.811788000 |
| C  | 2.972114000  | -4.538735000 | -0.879089000 |
| H  | 3.925485000  | -4.659609000 | -0.354671000 |
| H  | 2.158067000  | -4.694648000 | -0.165914000 |
| H  | 2.907709000  | -5.340521000 | -1.625175000 |
| C  | 4.218820000  | -2.953330000 | -3.142294000 |
| H  | 4.149468000  | -3.912745000 | -3.669001000 |
| H  | 4.132579000  | -2.160807000 | -3.890362000 |
| H  | 5.217410000  | -2.894149000 | -2.694805000 |
| C  | 1.158212000  | -2.766177000 | -2.624255000 |
| H  | 1.026891000  | -3.588950000 | -3.337193000 |
| H  | 0.356539000  | -2.849570000 | -1.881128000 |
| H  | 1.020666000  | -1.828290000 | -3.172878000 |
| H  | 2.689405000  | 5.721021000  | -0.233758000 |
| H  | 0.832733000  | -2.530902000 | 3.791166000  |
| Cl | 1.834565000  | 4.465206000  | 2.202396000  |
| Cl | -0.125513000 | -3.992988000 | 1.536186000  |
| H  | 0.705107000  | -0.097682000 | 4.311603000  |
| C  | -5.314447000 | -0.541279000 | 0.288565000  |
| C  | -6.138160000 | 0.140681000  | -0.632462000 |
| C  | -5.899380000 | -1.107761000 | 1.424046000  |
| C  | -7.508070000 | 0.254113000  | -0.370170000 |
| C  | -7.265249000 | -0.994567000 | 1.677102000  |
| H  | -5.266181000 | -1.638542000 | 2.133267000  |
| C  | -8.069623000 | -0.300823000 | 0.778450000  |
| H  | -8.147481000 | 0.778346000  | -1.074500000 |

|   |              |              |              |
|---|--------------|--------------|--------------|
| H | -7.693368000 | -1.439742000 | 2.570982000  |
| H | -9.136219000 | -0.198979000 | 0.960622000  |
| N | -5.540332000 | 0.701533000  | -1.806305000 |
| C | -6.132680000 | 1.944411000  | -2.277510000 |
| H | -5.460000000 | 2.399252000  | -3.014196000 |
| H | -7.114768000 | 1.816424000  | -2.766317000 |
| H | -6.250268000 | 2.640320000  | -1.441861000 |
| C | -5.416834000 | -0.261966000 | -2.896905000 |
| H | -6.392060000 | -0.516719000 | -3.348038000 |
| H | -4.775501000 | 0.154469000  | -3.682916000 |
| H | -4.965327000 | -1.190890000 | -2.537151000 |

Styrene,  $E_{(\text{SCF Done})} = -309.4773914$  a.u.

|   |              |              |              |
|---|--------------|--------------|--------------|
| C | 1.359938000  | 1.328099000  | -0.000055000 |
| C | -0.009506000 | 1.090869000  | -0.000147000 |
| C | -0.514707000 | -0.220375000 | -0.000085000 |
| C | 0.405967000  | -1.279822000 | 0.000016000  |
| C | 1.778697000  | -1.044692000 | 0.000119000  |
| C | 2.262203000  | 0.261906000  | 0.000078000  |
| H | 1.727962000  | 2.351212000  | -0.000121000 |
| H | -0.694900000 | 1.934088000  | -0.000274000 |
| H | 0.034577000  | -2.302805000 | 0.000048000  |
| H | 2.470325000  | -1.883514000 | 0.000210000  |
| H | 3.332608000  | 0.450846000  | 0.000133000  |
| C | -1.951155000 | -0.529361000 | -0.000204000 |
| C | -2.973187000 | 0.334965000  | 0.000243000  |
| H | -2.183770000 | -1.594900000 | -0.000675000 |
| H | -4.000340000 | -0.017820000 | 0.000123000  |
| H | -2.835956000 | 1.413348000  | 0.000766000  |

**SC1<sup>a</sup>**,  $E_{(\text{SCF Done})} = -1796.236267$  a.u.

|    |              |              |              |
|----|--------------|--------------|--------------|
| Sc | -0.326060000 | 0.003444000  | -0.270585000 |
| Si | -0.590598000 | 3.714264000  | -0.173740000 |
| C  | -1.240352000 | 1.948315000  | 0.085516000  |
| C  | -0.264874000 | 4.056761000  | -2.015636000 |
| C  | 1.006362000  | 4.028226000  | 0.821831000  |
| C  | -1.879607000 | 4.970421000  | 0.432074000  |
| C  | -0.575663000 | -1.074470000 | -3.706514000 |
| C  | -1.033218000 | -1.293068000 | -2.291443000 |
| C  | -2.183370000 | -0.696797000 | -1.699953000 |
| C  | -2.375378000 | -1.263072000 | -0.392208000 |
| C  | -1.334399000 | -2.245794000 | -0.218954000 |
| C  | -0.514751000 | -2.260155000 | -1.375687000 |
| C  | -3.077679000 | 0.267387000  | -2.425847000 |

|   |              |              |              |
|---|--------------|--------------|--------------|
| C | -1.208508000 | -3.239511000 | 0.902337000  |
| C | 0.594979000  | -3.239902000 | -1.638908000 |
| C | 1.632420000  | 0.907177000  | -1.646026000 |
| C | 2.500900000  | -0.130986000 | -1.724708000 |
| H | -2.218650000 | 1.943720000  | -0.420559000 |
| H | -1.490965000 | 1.884070000  | 1.163658000  |
| H | 0.565307000  | 3.472052000  | -2.428236000 |
| H | -0.020628000 | 5.115202000  | -2.164032000 |
| H | -1.158782000 | 3.842705000  | -2.613945000 |
| H | 0.811320000  | 3.972548000  | 1.900041000  |
| H | 1.385159000  | 5.036553000  | 0.617208000  |
| H | 1.816580000  | 3.325771000  | 0.588884000  |
| H | -2.817910000 | 4.871558000  | -0.126108000 |
| H | -1.521979000 | 5.999019000  | 0.303162000  |
| H | -2.107427000 | 4.825905000  | 1.494742000  |
| H | -0.753884000 | -0.050221000 | -4.050192000 |
| H | -1.125346000 | -1.733714000 | -4.391337000 |
| H | 0.487984000  | -1.291808000 | -3.849105000 |
| H | -2.513890000 | 0.935910000  | -3.085197000 |
| H | -3.660540000 | 0.889775000  | -1.747003000 |
| H | -3.788476000 | -0.279100000 | -3.060411000 |
| H | -1.862854000 | -4.101579000 | 0.718730000  |
| H | -1.491520000 | -2.827091000 | 1.874961000  |
| H | -0.191503000 | -3.636956000 | 0.983229000  |
| H | 1.347036000  | -3.264539000 | -0.840293000 |
| H | 1.112375000  | -3.028615000 | -2.579238000 |
| H | 0.194305000  | -4.258103000 | -1.724364000 |
| H | 1.826319000  | 1.791257000  | -1.043765000 |
| H | 0.821208000  | 0.983947000  | -2.373048000 |
| H | 2.253478000  | -0.936986000 | -2.414371000 |
| C | 1.706053000  | -1.347745000 | 1.922829000  |
| O | 0.730578000  | -0.301617000 | 1.612024000  |
| C | 0.564975000  | 0.578599000  | 2.782243000  |
| C | 1.378516000  | -0.071920000 | 3.891423000  |
| C | 2.469965000  | -0.818414000 | 3.121826000  |
| H | 1.152551000  | -2.260618000 | 2.158086000  |
| H | 2.321874000  | -1.500997000 | 1.034617000  |
| H | 0.946591000  | 1.562773000  | 2.500807000  |
| H | -0.501957000 | 0.644717000  | 2.999373000  |
| H | 1.776516000  | 0.672732000  | 4.585960000  |
| H | 0.762104000  | -0.773667000 | 4.463978000  |
| H | 3.263110000  | -0.135656000 | 2.798817000  |
| H | 2.925963000  | -1.625739000 | 3.701310000  |
| C | 4.338281000  | 0.703685000  | -0.217094000 |

|    |              |              |              |
|----|--------------|--------------|--------------|
| C  | 3.763354000  | -0.305873000 | -1.013151000 |
| C  | 4.453399000  | -1.522428000 | -1.163877000 |
| C  | 5.672646000  | -1.734050000 | -0.527185000 |
| C  | 6.225432000  | -0.727465000 | 0.263650000  |
| C  | 5.557357000  | 0.492128000  | 0.413998000  |
| H  | 3.846139000  | 1.667164000  | -0.116872000 |
| H  | 4.031503000  | -2.301349000 | -1.795147000 |
| H  | 6.196233000  | -2.676625000 | -0.657601000 |
| H  | 6.000926000  | 1.283961000  | 1.011067000  |
| Si | -3.861252000 | -1.070979000 | 0.807072000  |
| C  | -5.132415000 | 0.222013000  | 0.266398000  |
| H  | -5.574556000 | 0.001119000  | -0.709961000 |
| H  | -5.945618000 | 0.209196000  | 1.002859000  |
| H  | -4.728360000 | 1.239729000  | 0.248691000  |
| C  | -4.740359000 | -2.748242000 | 0.893792000  |
| H  | -4.115828000 | -3.532992000 | 1.331453000  |
| H  | -5.642037000 | -2.659756000 | 1.511348000  |
| H  | -5.050350000 | -3.079064000 | -0.103755000 |
| C  | -3.281177000 | -0.563417000 | 2.547072000  |
| H  | -2.506302000 | -1.215854000 | 2.963669000  |
| H  | -2.911056000 | 0.468441000  | 2.545134000  |
| H  | -4.136022000 | -0.598218000 | 3.233284000  |
| H  | 7.183070000  | -0.884360000 | 0.752129000  |

**STS1<sup>a</sup>**,  $E_{(\text{SCF Done})} = -1796.225381$  a.u. IF =  $i200.20$  cm<sup>-1</sup>

|    |              |              |              |
|----|--------------|--------------|--------------|
| Sc | 0.152333000  | -0.184812000 | -0.329857000 |
| Si | -1.086405000 | 3.637109000  | 0.361486000  |
| C  | -0.483907000 | 1.822830000  | 0.253393000  |
| C  | -1.964311000 | 4.173409000  | -1.227553000 |
| C  | 0.411304000  | 4.755539000  | 0.690908000  |
| C  | -2.279610000 | 3.782783000  | 1.827859000  |
| C  | -0.290248000 | -0.973231000 | -3.842699000 |
| C  | -0.699925000 | -1.253090000 | -2.425419000 |
| C  | -1.794756000 | -0.655474000 | -1.745265000 |
| C  | -1.982760000 | -1.331023000 | -0.486183000 |
| C  | -0.980542000 | -2.363514000 | -0.427068000 |
| C  | -0.184598000 | -2.301863000 | -1.603450000 |
| C  | -2.662857000 | 0.413008000  | -2.347493000 |
| C  | -0.873193000 | -3.439867000 | 0.616485000  |
| C  | 0.905363000  | -3.259251000 | -1.993673000 |
| C  | 0.941040000  | 1.908652000  | -1.606437000 |
| C  | 1.758766000  | 0.803759000  | -1.794370000 |
| H  | -1.383224000 | 1.175245000  | 0.407223000  |
| H  | 0.190324000  | 1.682930000  | 1.123148000  |



|   |              |              |              |
|---|--------------|--------------|--------------|
| H | -1.309675000 | 4.127988000  | -2.104580000 |
| H | -2.298866000 | 5.212359000  | -1.123653000 |
| H | -2.850704000 | 3.563252000  | -1.430735000 |
| H | 0.977380000  | 4.423669000  | 1.569601000  |
| H | 0.062197000  | 5.774192000  | 0.897461000  |
| H | 1.101641000  | 4.822372000  | -0.157454000 |
| H | -3.169434000 | 3.156773000  | 1.695902000  |
| H | -2.619722000 | 4.819456000  | 1.937707000  |
| H | -1.798035000 | 3.491959000  | 2.768732000  |
| H | -0.302502000 | 0.093876000  | -4.090845000 |
| H | -0.982088000 | -1.465096000 | -4.538988000 |
| H | 0.708656000  | -1.359337000 | -4.069679000 |
| H | -2.123759000 | 0.994457000  | -3.102276000 |
| H | -3.046437000 | 1.112683000  | -1.603186000 |
| H | -3.530008000 | -0.032228000 | -2.853162000 |
| H | -1.526475000 | -4.283327000 | 0.358649000  |
| H | -1.169576000 | -3.095869000 | 1.611127000  |
| H | 0.139362000  | -3.848486000 | 0.690852000  |
| H | 1.379599000  | -3.725956000 | -1.124791000 |
| H | 1.694664000  | -2.776319000 | -2.579269000 |
| H | 0.502967000  | -4.072838000 | -2.611634000 |
| H | 1.301477000  | 2.783100000  | -1.077856000 |
| H | 0.127645000  | 2.094102000  | -2.300192000 |
| H | 1.570683000  | 0.174806000  | -2.660746000 |
| C | 2.346576000  | -1.756225000 | 1.523713000  |
| O | 1.203132000  | -0.834923000 | 1.490790000  |
| C | 0.894529000  | -0.388481000 | 2.849089000  |
| C | 1.590364000  | -1.388156000 | 3.754268000  |
| C | 2.855409000  | -1.712552000 | 2.956620000  |
| H | 1.970934000  | -2.745583000 | 1.249193000  |
| H | 3.073162000  | -1.412794000 | 0.785839000  |
| H | 1.300897000  | 0.622117000  | 2.970678000  |
| H | -0.191376000 | -0.364787000 | 2.953066000  |
| H | 1.800354000  | -0.966119000 | 4.740797000  |
| H | 0.972120000  | -2.282771000 | 3.887943000  |
| H | 3.600613000  | -0.918526000 | 3.071993000  |
| H | 3.316299000  | -2.659235000 | 3.250965000  |
| C | 3.452399000  | 1.351235000  | 0.004484000  |
| C | 3.042701000  | 0.588723000  | -1.107003000 |
| C | 3.919763000  | -0.406494000 | -1.581142000 |
| C | 5.158054000  | -0.621049000 | -0.982146000 |
| C | 5.549982000  | 0.147097000  | 0.115511000  |
| C | 4.691228000  | 1.134129000  | 0.602816000  |
| H | 2.809674000  | 2.137520000  | 0.393494000  |

|    |              |              |              |
|----|--------------|--------------|--------------|
| H  | 3.636584000  | -0.993000000 | -2.452573000 |
| H  | 5.823832000  | -1.381393000 | -1.381461000 |
| H  | 4.994606000  | 1.750139000  | 1.445545000  |
| Si | -3.488412000 | -1.234431000 | 0.697249000  |
| C  | -4.712715000 | 0.137798000  | 0.241850000  |
| H  | -5.123884000 | 0.022049000  | -0.765423000 |
| H  | -5.551184000 | 0.076673000  | 0.946669000  |
| H  | -4.290506000 | 1.144710000  | 0.329785000  |
| C  | -4.407196000 | -2.888059000 | 0.596712000  |
| H  | -3.807170000 | -3.726819000 | 0.962538000  |
| H  | -5.318480000 | -2.841865000 | 1.204568000  |
| H  | -4.703771000 | -3.108766000 | -0.434719000 |
| C  | -2.967670000 | -0.907372000 | 2.497709000  |
| H  | -2.267592000 | -1.651071000 | 2.892628000  |
| H  | -2.526551000 | 0.090122000  | 2.613714000  |
| H  | -3.860128000 | -0.938418000 | 3.134636000  |
| H  | 6.519737000  | -0.012571000 | 0.578038000  |

**SP1<sup>a</sup>**,  $E_{(\text{SCF Done})} = -1796.261834$  a.u.

|    |              |              |              |
|----|--------------|--------------|--------------|
| Sc | -0.937519000 | -0.211406000 | -0.377427000 |
| Si | 4.404663000  | -0.349807000 | -0.080687000 |
| C  | 2.500473000  | -0.504431000 | -0.317703000 |
| C  | 5.090370000  | 0.943754000  | -1.282402000 |
| C  | 5.204383000  | -2.036886000 | -0.405901000 |
| C  | 4.730022000  | 0.185022000  | 1.709428000  |
| C  | -2.514281000 | 0.855180000  | -3.407976000 |
| C  | -2.150046000 | 1.222019000  | -1.997967000 |
| C  | -0.970067000 | 1.903359000  | -1.595495000 |
| C  | -1.052712000 | 2.170341000  | -0.181134000 |
| C  | -2.332968000 | 1.667690000  | 0.255530000  |
| C  | -2.991184000 | 1.066824000  | -0.851421000 |
| C  | 0.102152000  | 2.349374000  | -2.547391000 |
| C  | -2.957422000 | 1.874849000  | 1.606768000  |
| C  | -4.377688000 | 0.487051000  | -0.852919000 |
| C  | 2.036622000  | -0.863218000 | -1.742072000 |
| C  | 0.532546000  | -1.020090000 | -1.905581000 |
| H  | 2.053661000  | 0.458102000  | -0.010765000 |
| H  | 2.154274000  | -1.261459000 | 0.402794000  |
| H  | 4.941099000  | 0.647477000  | -2.326669000 |
| H  | 6.168330000  | 1.069902000  | -1.128750000 |
| H  | 4.620982000  | 1.923711000  | -1.137011000 |
| H  | 4.816473000  | -2.806008000 | 0.272567000  |
| H  | 6.287873000  | -1.978847000 | -0.250271000 |
| H  | 5.039946000  | -2.376902000 | -1.434567000 |

|    |              |              |              |
|----|--------------|--------------|--------------|
| H  | 4.274678000  | 1.157335000  | 1.931318000  |
| H  | 5.806825000  | 0.279353000  | 1.891670000  |
| H  | 4.340683000  | -0.545866000 | 2.428274000  |
| H  | -1.667141000 | 0.455157000  | -3.975848000 |
| H  | -2.868486000 | 1.741087000  | -3.950952000 |
| H  | -3.322103000 | 0.117667000  | -3.449256000 |
| H  | 0.101457000  | 1.749073000  | -3.462107000 |
| H  | 1.102130000  | 2.292067000  | -2.113472000 |
| H  | -0.063541000 | 3.391307000  | -2.851550000 |
| H  | -3.421751000 | 2.867762000  | 1.659506000  |
| H  | -2.231855000 | 1.816442000  | 2.423230000  |
| H  | -3.755150000 | 1.152985000  | 1.807098000  |
| H  | -4.658144000 | 0.074963000  | 0.121981000  |
| H  | -4.495871000 | -0.309918000 | -1.594357000 |
| H  | -5.119253000 | 1.259393000  | -1.095924000 |
| H  | 2.560182000  | -1.771581000 | -2.078991000 |
| H  | 2.368999000  | -0.072755000 | -2.424293000 |
| H  | 0.139246000  | -0.595951000 | -2.834353000 |
| C  | -2.292145000 | -1.623054000 | 2.171875000  |
| O  | -1.029752000 | -1.120277000 | 1.617615000  |
| C  | 0.085184000  | -1.553583000 | 2.466325000  |
| C  | -0.566122000 | -2.059529000 | 3.741935000  |
| C  | -1.884302000 | -2.639258000 | 3.224287000  |
| H  | -2.821676000 | -0.770955000 | 2.605278000  |
| H  | -2.870807000 | -2.049208000 | 1.348729000  |
| H  | 0.611955000  | -2.348888000 | 1.930413000  |
| H  | 0.743682000  | -0.695113000 | 2.610067000  |
| H  | 0.058497000  | -2.800393000 | 4.248179000  |
| H  | -0.749891000 | -1.233773000 | 4.438210000  |
| H  | -1.723165000 | -3.621041000 | 2.766827000  |
| H  | -2.643973000 | -2.741813000 | 4.003908000  |
| C  | 0.440931000  | -3.311056000 | -0.802621000 |
| C  | -0.148100000 | -2.242977000 | -1.533798000 |
| C  | -1.568788000 | -2.292874000 | -1.691551000 |
| C  | -2.331050000 | -3.365174000 | -1.197232000 |
| C  | -1.717271000 | -4.399974000 | -0.505546000 |
| C  | -0.324192000 | -4.364961000 | -0.325856000 |
| H  | 1.519392000  | -3.330451000 | -0.672548000 |
| H  | -2.045777000 | -1.578315000 | -2.366380000 |
| H  | -3.399844000 | -3.396541000 | -1.395569000 |
| H  | 0.169478000  | -5.191315000 | 0.180703000  |
| Si | 0.056251000  | 3.313022000  | 0.889096000  |
| C  | 1.591760000  | 3.935089000  | -0.026430000 |
| H  | 1.344138000  | 4.502552000  | -0.928448000 |

|   |              |              |              |
|---|--------------|--------------|--------------|
| H | 2.128551000  | 4.612406000  | 0.649331000  |
| H | 2.284898000  | 3.132911000  | -0.300060000 |
| C | -0.972729000 | 4.823243000  | 1.387716000  |
| H | -1.811153000 | 4.569963000  | 2.043320000  |
| H | -0.337552000 | 5.538824000  | 1.923311000  |
| H | -1.374279000 | 5.329818000  | 0.503143000  |
| C | 0.676614000  | 2.417925000  | 2.450248000  |
| H | -0.123277000 | 1.965188000  | 3.045442000  |
| H | 1.409786000  | 1.640833000  | 2.202249000  |
| H | 1.187329000  | 3.143099000  | 3.095510000  |
| H | -2.296657000 | -5.243517000 | -0.142302000 |

**SC2<sup>a</sup><sub>syn</sub>,  $E_{(\text{SCF Done})} = -2105.735475$  a.u.**

|    |              |              |              |
|----|--------------|--------------|--------------|
| Sc | -0.230349000 | -0.794219000 | 0.367450000  |
| Si | 5.140378000  | 0.275693000  | -1.944774000 |
| C  | 3.701305000  | 0.431502000  | -0.686183000 |
| C  | 4.525061000  | -0.609236000 | -3.509321000 |
| C  | 6.577311000  | -0.692340000 | -1.175617000 |
| C  | 5.709149000  | 2.028434000  | -2.393263000 |
| C  | 1.302431000  | -3.753981000 | -1.063285000 |
| C  | 0.037977000  | -3.054199000 | -0.666084000 |
| C  | -0.816911000 | -2.297269000 | -1.513155000 |
| C  | -2.037857000 | -2.002927000 | -0.805046000 |
| C  | -1.903176000 | -2.603644000 | 0.493621000  |
| C  | -0.627637000 | -3.224992000 | 0.585199000  |
| C  | -0.510248000 | -2.008936000 | -2.958101000 |
| C  | -2.977819000 | -2.744188000 | 1.534274000  |
| C  | -0.126926000 | -4.060313000 | 1.728476000  |
| C  | 3.143565000  | -0.907599000 | -0.193017000 |
| C  | 1.950563000  | -0.936254000 | 0.804430000  |
| H  | 2.925787000  | 1.042606000  | -1.171403000 |
| H  | 4.081251000  | 1.022523000  | 0.157102000  |
| H  | 4.218653000  | -1.640997000 | -3.301503000 |
| H  | 5.317735000  | -0.651275000 | -4.265265000 |
| H  | 3.673010000  | -0.082458000 | -3.956201000 |
| H  | 6.933041000  | -0.210359000 | -0.257598000 |
| H  | 7.422118000  | -0.743225000 | -1.872212000 |
| H  | 6.292156000  | -1.720826000 | -0.926865000 |
| H  | 4.894914000  | 2.614802000  | -2.835281000 |
| H  | 6.527912000  | 1.997501000  | -3.121319000 |
| H  | 6.072096000  | 2.567576000  | -1.510521000 |
| H  | 1.750861000  | -3.327787000 | -1.964223000 |
| H  | 1.088680000  | -4.808950000 | -1.282051000 |
| H  | 2.061320000  | -3.738053000 | -0.274479000 |

|   |              |              |              |
|---|--------------|--------------|--------------|
| H | 0.566011000  | -1.916154000 | -3.137417000 |
| H | -0.989141000 | -1.096756000 | -3.320911000 |
| H | -0.864234000 | -2.828139000 | -3.597730000 |
| H | -3.591485000 | -3.628928000 | 1.321777000  |
| H | -3.652037000 | -1.883970000 | 1.567659000  |
| H | -2.563544000 | -2.893004000 | 2.536076000  |
| H | -0.482764000 | -3.701360000 | 2.700359000  |
| H | 0.966418000  | -4.093613000 | 1.765607000  |
| H | -0.474714000 | -5.097195000 | 1.626894000  |
| H | 3.979553000  | -1.452007000 | 0.273747000  |
| H | 2.856640000  | -1.512181000 | -1.062797000 |
| H | 1.894839000  | -1.986588000 | 1.143497000  |
| C | -1.453075000 | 1.746847000  | 1.936568000  |
| O | -1.256238000 | 0.297719000  | 1.981041000  |
| C | -1.490015000 | -0.186652000 | 3.345693000  |
| C | -1.622109000 | 1.064293000  | 4.199009000  |
| C | -2.206411000 | 2.076975000  | 3.212364000  |
| H | -0.462034000 | 2.212113000  | 1.918675000  |
| H | -1.997430000 | 1.979610000  | 1.020293000  |
| H | -2.410753000 | -0.772612000 | 3.325132000  |
| H | -0.642045000 | -0.816203000 | 3.624432000  |
| H | -2.264192000 | 0.893098000  | 5.067465000  |
| H | -0.637962000 | 1.388988000  | 4.550937000  |
| H | -3.282428000 | 1.919161000  | 3.077661000  |
| H | -2.047646000 | 3.114393000  | 3.518922000  |
| C | 2.176727000  | 1.296701000  | 2.041110000  |
| C | 2.068089000  | -0.113374000 | 2.047475000  |
| C | 2.050178000  | -0.732484000 | 3.318234000  |
| C | 2.152096000  | -0.000462000 | 4.500101000  |
| C | 2.279744000  | 1.388778000  | 4.460156000  |
| C | 2.293825000  | 2.030040000  | 3.220903000  |
| H | 2.216979000  | 1.825341000  | 1.092738000  |
| H | 2.007948000  | -1.819641000 | 3.370225000  |
| H | 2.162404000  | -0.520861000 | 5.454973000  |
| H | 2.410716000  | 3.110346000  | 3.170901000  |
| C | -2.753128000 | 3.294294000  | -2.137413000 |
| C | -1.494626000 | 2.984099000  | -1.590012000 |
| C | -0.793270000 | 3.990285000  | -0.897257000 |
| C | -1.345841000 | 5.254514000  | -0.743488000 |
| C | -2.604873000 | 5.541589000  | -1.280517000 |
| C | -3.306573000 | 4.560707000  | -1.979959000 |
| H | -3.295393000 | 2.533724000  | -2.694024000 |
| H | 0.200111000  | 3.791571000  | -0.504496000 |
| H | -0.790679000 | 6.026971000  | -0.218914000 |

|    |              |              |              |
|----|--------------|--------------|--------------|
| H  | -4.278465000 | 4.785058000  | -2.409533000 |
| C  | -0.952861000 | 1.648261000  | -1.805983000 |
| C  | 0.172524000  | 1.107608000  | -1.276069000 |
| H  | -1.523786000 | 1.031584000  | -2.498583000 |
| H  | 0.581895000  | 0.192120000  | -1.714415000 |
| H  | 0.844227000  | 1.674403000  | -0.636404000 |
| Si | -3.725330000 | -1.431584000 | -1.501051000 |
| C  | -3.676301000 | -0.984481000 | -3.345614000 |
| H  | -3.074179000 | -0.104559000 | -3.594758000 |
| H  | -3.323959000 | -1.819394000 | -3.959504000 |
| H  | -4.705901000 | -0.766567000 | -3.655742000 |
| C  | -4.422056000 | 0.063849000  | -0.554416000 |
| H  | -4.584806000 | -0.150261000 | 0.507176000  |
| H  | -3.769509000 | 0.941228000  | -0.625967000 |
| H  | -5.393842000 | 0.341785000  | -0.980518000 |
| C  | -4.939826000 | -2.879836000 | -1.350518000 |
| H  | -5.189324000 | -3.121933000 | -0.313369000 |
| H  | -5.875354000 | -2.627245000 | -1.863860000 |
| H  | -4.534553000 | -3.782233000 | -1.821739000 |
| H  | 2.386973000  | 1.959773000  | 5.378279000  |
| H  | -3.029563000 | 6.534746000  | -1.163944000 |

**STS2<sup>a</sup>**<sub>syn</sub>,  $E_{(\text{SCF Done})} = -2105.723512$  a.u.  $\text{IF} = i171.48\text{cm}^{-1}$

|    |              |              |              |
|----|--------------|--------------|--------------|
| Sc | -0.561021000 | -0.467740000 | 0.249467000  |
| Si | 5.880373000  | -0.710125000 | -0.843189000 |
| C  | 4.172613000  | -0.038669000 | -0.270762000 |
| C  | 5.694159000  | -1.593839000 | -2.510596000 |
| C  | 6.558350000  | -1.909823000 | 0.458717000  |
| C  | 7.036460000  | 0.779920000  | -1.021511000 |
| C  | 0.550681000  | -3.820631000 | -0.520831000 |
| C  | -0.618270000 | -2.956082000 | -0.147416000 |
| C  | -1.551839000 | -2.384575000 | -1.052373000 |
| C  | -2.617760000 | -1.775050000 | -0.302704000 |
| C  | -2.324914000 | -2.023761000 | 1.084885000  |
| C  | -1.094247000 | -2.729170000 | 1.178951000  |
| C  | -1.481836000 | -2.606852000 | -2.537351000 |
| C  | -3.263337000 | -1.853374000 | 2.247285000  |
| C  | -0.519447000 | -3.329149000 | 2.430582000  |
| C  | 3.109657000  | -1.114245000 | -0.033413000 |
| C  | 1.711481000  | -0.677587000 | 0.448436000  |
| H  | 3.851957000  | 0.694018000  | -1.025669000 |
| H  | 4.347202000  | 0.530258000  | 0.652032000  |
| H  | 5.052557000  | -2.479704000 | -2.437789000 |
| H  | 6.672340000  | -1.929666000 | -2.873757000 |

|   |               |               |               |
|---|---------------|---------------|---------------|
| H | 5. 270765000  | -0. 929281000 | -3. 272858000 |
| H | 6. 636788000  | -1. 431675000 | 1. 442050000  |
| H | 7. 561675000  | -2. 248951000 | 0. 176104000  |
| H | 5. 930186000  | -2. 801817000 | 0. 564612000  |
| H | 6. 656687000  | 1. 498033000  | -1. 757609000 |
| H | 8. 031188000  | 0. 461271000  | -1. 353646000 |
| H | 7. 159117000  | 1. 306451000  | -0. 067968000 |
| H | 1. 026851000  | -3. 505176000 | -1. 455129000 |
| H | 0. 225169000  | -4. 859134000 | -0. 667979000 |
| H | 1. 323147000  | -3. 838960000 | 0. 255009000  |
| H | -0. 452948000 | -2. 597814000 | -2. 913313000 |
| H | -2. 052136000 | -1. 874837000 | -3. 110064000 |
| H | -1. 894667000 | -3. 594210000 | -2. 784441000 |
| H | -3. 781339000 | -2. 802479000 | 2. 439225000  |
| H | -4. 035147000 | -1. 103644000 | 2. 060787000  |
| H | -2. 749362000 | -1. 587697000 | 3. 177139000  |
| H | -0. 766088000 | -2. 747012000 | 3. 324681000  |
| H | 0. 570486000  | -3. 433133000 | 2. 386474000  |
| H | -0. 923687000 | -4. 338149000 | 2. 589155000  |
| H | 3. 501686000  | -1. 808281000 | 0. 725199000  |
| H | 2. 984478000  | -1. 721544000 | -0. 940306000 |
| H | 1. 228930000  | -1. 608264000 | 0. 817967000  |
| C | -1. 426151000 | 2. 679719000  | 0. 853513000  |
| O | -1. 489341000 | 1. 272733000  | 1. 280222000  |
| C | -2. 070215000 | 1. 206723000  | 2. 620029000  |
| C | -2. 047127000 | 2. 630115000  | 3. 145893000  |
| C | -2. 258419000 | 3. 442263000  | 1. 868765000  |
| H | -0. 374467000 | 2. 975065000  | 0. 872231000  |
| H | -1. 804845000 | 2. 735776000  | -0. 165638000 |
| H | -3. 089809000 | 0. 830489000  | 2. 519457000  |
| H | -1. 470718000 | 0. 508518000  | 3. 207366000  |
| H | -2. 824776000 | 2. 795102000  | 3. 897066000  |
| H | -1. 075229000 | 2. 857602000  | 3. 595109000  |
| H | -3. 315316000 | 3. 444259000  | 1. 579622000  |
| H | -1. 928241000 | 4. 480791000  | 1. 959095000  |
| C | 2. 048200000  | 1. 677059000  | 1. 361758000  |
| C | 1. 663981000  | 0. 329489000  | 1. 546703000  |
| C | 1. 281140000  | -0. 062657000 | 2. 848002000  |
| C | 1. 306288000  | 0. 836911000  | 3. 917108000  |
| C | 1. 719187000  | 2. 150681000  | 3. 713216000  |
| C | 2. 087672000  | 2. 565912000  | 2. 428998000  |
| H | 2. 341251000  | 2. 016245000  | 0. 374215000  |
| H | 1. 040413000  | -1. 106192000 | 3. 038664000  |
| H | 1. 036767000  | 0. 496693000  | 4. 913830000  |

|    |              |              |              |
|----|--------------|--------------|--------------|
| H  | 2.416393000  | 3.588775000  | 2.263991000  |
| C  | -1.710966000 | 2.293625000  | -2.680983000 |
| C  | -0.454225000 | 1.872947000  | -2.205695000 |
| C  | 0.535491000  | 2.855520000  | -2.027754000 |
| C  | 0.272852000  | 4.196758000  | -2.291784000 |
| C  | -0.984694000 | 4.597217000  | -2.745614000 |
| C  | -1.973867000 | 3.634406000  | -2.947991000 |
| H  | -2.486192000 | 1.551407000  | -2.857739000 |
| H  | 1.532089000  | 2.571838000  | -1.701231000 |
| H  | 1.060423000  | 4.933544000  | -2.155391000 |
| H  | -2.950826000 | 3.926389000  | -3.324267000 |
| C  | -0.225945000 | 0.435617000  | -1.977374000 |
| C  | 1.008211000  | -0.147817000 | -1.697808000 |
| H  | -0.994039000 | -0.211921000 | -2.392366000 |
| H  | 1.161052000  | -1.194384000 | -1.944249000 |
| H  | 1.914634000  | 0.445510000  | -1.710265000 |
| Si | -4.327781000 | -1.177361000 | -0.926903000 |
| C  | -4.469390000 | -1.093107000 | -2.816504000 |
| H  | -3.767879000 | -0.396344000 | -3.287577000 |
| H  | -4.353150000 | -2.073173000 | -3.289494000 |
| H  | -5.480715000 | -0.738576000 | -3.051958000 |
| C  | -4.754549000 | 0.555720000  | -0.271659000 |
| H  | -4.797478000 | 0.607383000  | 0.821142000  |
| H  | -4.034223000 | 1.302980000  | -0.622746000 |
| H  | -5.742728000 | 0.846104000  | -0.648437000 |
| C  | -5.626412000 | -2.425783000 | -0.335128000 |
| H  | -5.703719000 | -2.478734000 | 0.755063000  |
| H  | -6.612674000 | -2.147113000 | -0.725018000 |
| H  | -5.394278000 | -3.430812000 | -0.705254000 |
| H  | 1.769846000  | 2.845353000  | 4.547206000  |
| H  | -1.184411000 | 5.643720000  | -2.957159000 |

**SP2<sup>a</sup><sub>syn</sub>**,  $E_{(\text{SCF Done})} = -2105.771045\text{a.u.}$

|    |              |              |              |
|----|--------------|--------------|--------------|
| Sc | -1.433961000 | 0.078651000  | -0.048281000 |
| Si | 6.832639000  | 0.921514000  | -0.551844000 |
| C  | 4.998878000  | 0.552380000  | -0.139108000 |
| C  | 6.927368000  | 2.260786000  | -1.893500000 |
| C  | 7.684353000  | -0.660104000 | -1.161720000 |
| C  | 7.674186000  | 1.540353000  | 1.031429000  |
| C  | -0.456892000 | -2.256598000 | -2.548305000 |
| C  | -1.565215000 | -1.757789000 | -1.670182000 |
| C  | -2.561997000 | -0.816043000 | -2.037356000 |
| C  | -3.533054000 | -0.723865000 | -0.978446000 |
| C  | -3.125568000 | -1.673944000 | 0.027111000  |



|   |              |              |              |
|---|--------------|--------------|--------------|
| C | -1.913406000 | -2.290423000 | -0.386857000 |
| C | -2.603490000 | -0.145342000 | -3.381360000 |
| C | -3.883685000 | -2.013387000 | 1.281940000  |
| C | -1.163833000 | -3.391984000 | 0.307637000  |
| C | 4.168603000  | 0.026203000  | -1.312027000 |
| C | 2.673384000  | -0.281577000 | -1.007357000 |
| H | 4.562147000  | 1.481845000  | 0.255388000  |
| H | 4.983155000  | -0.170093000 | 0.689059000  |
| H | 6.454842000  | 1.935186000  | -2.827556000 |
| H | 7.971514000  | 2.504333000  | -2.121528000 |
| H | 6.435262000  | 3.186004000  | -1.570990000 |
| H | 7.619083000  | -1.461527000 | -0.416616000 |
| H | 8.746782000  | -0.474734000 | -1.357816000 |
| H | 7.237665000  | -1.027573000 | -2.092655000 |
| H | 7.195074000  | 2.452022000  | 1.407208000  |
| H | 8.729636000  | 1.772141000  | 0.847920000  |
| H | 7.633369000  | 0.786183000  | 1.825964000  |
| H | -0.052719000 | -1.472689000 | -3.196736000 |
| H | -0.824772000 | -3.056956000 | -3.204992000 |
| H | 0.369526000  | -2.668557000 | -1.964073000 |
| H | -1.599598000 | 0.043172000  | -3.776821000 |
| H | -3.145176000 | 0.801967000  | -3.368471000 |
| H | -3.110237000 | -0.792179000 | -4.110247000 |
| H | -4.903533000 | -2.335583000 | 1.045014000  |
| H | -3.969586000 | -1.169467000 | 1.975726000  |
| H | -3.412011000 | -2.840030000 | 1.820109000  |
| H | -1.468613000 | -3.510797000 | 1.351218000  |
| H | -0.079941000 | -3.235001000 | 0.293475000  |
| H | -1.351251000 | -4.351734000 | -0.191616000 |
| H | 4.626582000  | -0.891246000 | -1.704154000 |
| H | 4.186612000  | 0.752591000  | -2.136704000 |
| H | 2.236216000  | -0.595140000 | -1.967176000 |
| C | -2.027189000 | 1.313933000  | 2.865829000  |
| O | -1.434007000 | 0.197781000  | 2.112880000  |
| C | -0.895208000 | -0.795005000 | 3.043823000  |
| C | -0.678530000 | -0.017574000 | 4.327549000  |
| C | -1.881403000 | 0.930252000  | 4.333745000  |
| H | -1.461270000 | 2.208529000  | 2.597611000  |
| H | -3.065286000 | 1.423147000  | 2.542708000  |
| H | -1.643329000 | -1.585247000 | 3.162413000  |
| H | 0.012850000  | -1.206966000 | 2.597881000  |
| H | -0.648983000 | -0.673120000 | 5.202060000  |
| H | 0.262283000  | 0.542371000  | 4.283707000  |
| H | -2.776931000 | 0.409165000  | 4.689169000  |

|    |              |              |              |
|----|--------------|--------------|--------------|
| H  | -1.729194000 | 1.809455000  | 4.965278000  |
| C  | 2.483993000  | -1.355897000 | 1.327339000  |
| C  | 2.571491000  | -1.472014000 | -0.067440000 |
| C  | 2.699996000  | -2.765485000 | -0.599313000 |
| C  | 2.732566000  | -3.894010000 | 0.217268000  |
| C  | 2.638838000  | -3.758430000 | 1.602947000  |
| C  | 2.519323000  | -2.484040000 | 2.153019000  |
| H  | 2.434298000  | -0.372636000 | 1.788998000  |
| H  | 2.802722000  | -2.885093000 | -1.676561000 |
| H  | 2.842228000  | -4.879392000 | -0.228313000 |
| H  | 2.481592000  | -2.361340000 | 3.233373000  |
| C  | -1.635194000 | 2.409876000  | -0.907299000 |
| C  | -0.283143000 | 2.244593000  | -0.478722000 |
| C  | 0.179226000  | 3.171314000  | 0.497950000  |
| C  | -0.629704000 | 4.197601000  | 0.959481000  |
| C  | -1.958248000 | 4.339596000  | 0.521930000  |
| C  | -2.451407000 | 3.446001000  | -0.414611000 |
| H  | -1.984437000 | 1.850372000  | -1.779196000 |
| H  | 1.205652000  | 3.109716000  | 0.845143000  |
| H  | -0.220733000 | 4.915881000  | 1.666490000  |
| H  | -3.457340000 | 3.564676000  | -0.807705000 |
| C  | 0.447101000  | 1.054958000  | -0.891564000 |
| C  | 1.933241000  | 0.990422000  | -0.560654000 |
| H  | 0.250454000  | 0.807523000  | -1.945906000 |
| H  | 2.432008000  | 1.844025000  | -1.048189000 |
| H  | 2.091429000  | 1.152280000  | 0.512043000  |
| Si | -5.257741000 | 0.111773000  | -1.008994000 |
| C  | -5.461992000 | 1.385000000  | -2.400329000 |
| H  | -4.729512000 | 2.198985000  | -2.370502000 |
| H  | -5.427619000 | 0.927349000  | -3.393874000 |
| H  | -6.454165000 | 1.839927000  | -2.289081000 |
| C  | -5.618709000 | 1.010059000  | 0.626870000  |
| H  | -5.651018000 | 0.335140000  | 1.487766000  |
| H  | -4.886577000 | 1.801574000  | 0.827980000  |
| H  | -6.601991000 | 1.491045000  | 0.557866000  |
| C  | -6.546239000 | -1.249052000 | -1.292072000 |
| H  | -6.558044000 | -1.999915000 | -0.495362000 |
| H  | -7.548652000 | -0.807896000 | -1.346002000 |
| H  | -6.357934000 | -1.768463000 | -2.238253000 |
| H  | 2.677011000  | -4.634003000 | 2.245168000  |
| H  | -2.573515000 | 5.156258000  | 0.887095000  |

**SC2<sub>iso</sub>**,  $E_{(\text{SCF Done})} = -2105.746205$  a.u.

|    |              |              |              |
|----|--------------|--------------|--------------|
| Sc | -0.388654000 | -0.460437000 | -0.091088000 |
|----|--------------|--------------|--------------|

|    |              |              |              |
|----|--------------|--------------|--------------|
| Si | 5.977526000  | -0.098900000 | -0.473321000 |
| C  | 4.335544000  | -1.082645000 | -0.464004000 |
| C  | 6.230477000  | 0.737821000  | 1.213576000  |
| C  | 5.928363000  | 1.225984000  | -1.833645000 |
| C  | 7.394777000  | -1.312207000 | -0.804269000 |
| C  | 1.020440000  | -0.612282000 | -3.412548000 |
| C  | -0.223948000 | -0.509010000 | -2.583935000 |
| C  | -0.871478000 | 0.704610000  | -2.220205000 |
| C  | -2.126609000 | 0.381675000  | -1.625900000 |
| C  | -2.261396000 | -1.047942000 | -1.582893000 |
| C  | -1.059325000 | -1.583116000 | -2.176932000 |
| C  | -0.398067000 | 2.077763000  | -2.593622000 |
| C  | -3.149852000 | 1.427140000  | -1.276978000 |
| C  | 3.049386000  | -0.260077000 | -0.262759000 |
| C  | 1.777876000  | -1.097513000 | -0.202597000 |
| H  | 4.408062000  | -1.854100000 | 0.316323000  |
| H  | 4.265587000  | -1.632724000 | -1.413946000 |
| H  | 5.434720000  | 1.457712000  | 1.439784000  |
| H  | 7.180323000  | 1.284693000  | 1.232828000  |
| H  | 6.260483000  | -0.000647000 | 2.023572000  |
| H  | 5.762261000  | 0.779124000  | -2.820943000 |
| H  | 6.877874000  | 1.772178000  | -1.874172000 |
| H  | 5.134606000  | 1.961439000  | -1.656654000 |
| H  | 7.435060000  | -2.094647000 | -0.037714000 |
| H  | 8.361378000  | -0.795455000 | -0.803621000 |
| H  | 7.280060000  | -1.802588000 | -1.777794000 |
| H  | 0.778807000  | -0.463002000 | -4.473578000 |
| H  | 1.494799000  | -1.594603000 | -3.330910000 |
| H  | 1.767532000  | 0.141194000  | -3.143651000 |
| H  | 0.694890000  | 2.151659000  | -2.591585000 |
| H  | -0.791560000 | 2.851727000  | -1.929513000 |
| H  | -0.729104000 | 2.328725000  | -3.610853000 |
| H  | -2.702818000 | 2.290946000  | -0.771890000 |
| H  | -3.948940000 | 1.041187000  | -0.644236000 |
| H  | -3.622926000 | 1.811145000  | -2.190861000 |
| H  | 2.959381000  | 0.461400000  | -1.086685000 |
| H  | 3.145708000  | 0.352658000  | 0.645009000  |
| H  | 1.687820000  | -1.716337000 | -1.103520000 |
| C  | -1.003095000 | -0.398682000 | 3.152673000  |
| O  | -1.553157000 | -0.239886000 | 1.800775000  |
| C  | -2.961346000 | 0.124866000  | 1.895428000  |
| C  | -3.372786000 | -0.245878000 | 3.308239000  |
| C  | -2.101181000 | 0.063798000  | 4.099150000  |
| H  | -0.757834000 | -1.453987000 | 3.277186000  |

|    |              |              |              |
|----|--------------|--------------|--------------|
| H  | -0.087846000 | 0.193417000  | 3.218985000  |
| H  | -3.048113000 | 1.201211000  | 1.709821000  |
| H  | -3.489765000 | -0.419492000 | 1.114951000  |
| H  | -4.241326000 | 0.326252000  | 3.645846000  |
| H  | -3.619070000 | -1.311752000 | 3.369955000  |
| H  | -2.023622000 | 1.138945000  | 4.298557000  |
| H  | -2.052605000 | -0.459658000 | 5.057794000  |
| C  | 2.132076000  | -1.749600000 | 2.242051000  |
| C  | 1.500863000  | -1.911301000 | 0.979584000  |
| C  | 0.445218000  | -2.861456000 | 0.917957000  |
| C  | 0.090590000  | -3.647110000 | 2.023383000  |
| C  | 0.768549000  | -3.504762000 | 3.228229000  |
| C  | 1.790862000  | -2.547974000 | 3.324342000  |
| H  | 2.952114000  | -1.043864000 | 2.341108000  |
| H  | 0.007116000  | -3.105611000 | -0.051866000 |
| H  | -0.690186000 | -4.396176000 | 1.918814000  |
| H  | 2.338164000  | -2.439780000 | 4.257872000  |
| C  | -1.820898000 | 4.600408000  | 1.257541000  |
| C  | -0.635064000 | 4.022189000  | 0.770896000  |
| C  | 0.127370000  | 4.741244000  | -0.168094000 |
| C  | -0.300289000 | 5.983263000  | -0.620355000 |
| C  | -1.492760000 | 6.533579000  | -0.143096000 |
| C  | -2.251891000 | 5.841128000  | 0.799729000  |
| H  | -2.405885000 | 4.069814000  | 2.006230000  |
| H  | 1.071067000  | 4.338303000  | -0.524349000 |
| H  | 0.302495000  | 6.532679000  | -1.337849000 |
| H  | -3.171673000 | 6.272443000  | 1.184170000  |
| C  | -0.223567000 | 2.722809000  | 1.295532000  |
| C  | 0.744503000  | 1.898188000  | 0.834700000  |
| H  | -0.761057000 | 2.412762000  | 2.192222000  |
| H  | 1.082551000  | 1.062436000  | 1.448570000  |
| H  | 1.368979000  | 2.140927000  | -0.020820000 |
| C  | -0.775963000 | -3.025225000 | -2.498861000 |
| H  | -1.337344000 | -3.716232000 | -1.863920000 |
| H  | -1.052208000 | -3.246585000 | -3.537843000 |
| H  | 0.286999000  | -3.273731000 | -2.399504000 |
| Si | -3.829594000 | -2.117689000 | -1.314956000 |
| C  | -5.389232000 | -1.104542000 | -0.923256000 |
| H  | -5.599154000 | -0.364173000 | -1.702047000 |
| H  | -6.231020000 | -1.808307000 | -0.911291000 |
| H  | -5.391167000 | -0.593530000 | 0.045181000  |
| C  | -4.205838000 | -3.020782000 | -2.938177000 |
| H  | -3.441672000 | -3.753657000 | -3.211584000 |
| H  | -5.159207000 | -3.554658000 | -2.845928000 |

|   |              |              |              |
|---|--------------|--------------|--------------|
| H | -4.302292000 | -2.307415000 | -3.764353000 |
| C | -3.584138000 | -3.387833000 | 0.079465000  |
| H | -2.797077000 | -4.113142000 | -0.153865000 |
| H | -3.329871000 | -2.914778000 | 1.034949000  |
| H | -4.511980000 | -3.953714000 | 0.226487000  |
| H | 0.525601000  | -4.136785000 | 4.077426000  |
| H | -1.820205000 | 7.507516000  | -0.495866000 |

**STS2<sup>a</sup><sub>iso</sub>**,  $E_{(\text{SCF}_{\text{Done}})} = -2105.725731$  a.u. **IF** =  $i247.76$  cm<sup>-1</sup>

|    |              |              |              |
|----|--------------|--------------|--------------|
| Sc | -0.693800000 | 0.267547000  | 0.227835000  |
| Si | 5.596597000  | -1.262626000 | -0.820469000 |
| C  | 3.693776000  | -1.462361000 | -0.651853000 |
| C  | 6.399286000  | -1.376855000 | 0.894499000  |
| C  | 5.985936000  | 0.418212000  | -1.610046000 |
| C  | 6.224656000  | -2.662737000 | -1.930007000 |
| C  | 0.882526000  | 1.602036000  | -2.670287000 |
| C  | -0.421993000 | 1.146297000  | -2.083521000 |
| C  | -1.394068000 | 1.982587000  | -1.458933000 |
| C  | -2.533514000 | 1.181158000  | -1.163562000 |
| C  | -2.299731000 | -0.160528000 | -1.630561000 |
| C  | -0.975976000 | -0.156923000 | -2.200630000 |
| C  | -1.370150000 | 3.479538000  | -1.421632000 |
| C  | -3.806341000 | 1.766605000  | -0.617347000 |
| C  | 2.990301000  | -0.394277000 | 0.197441000  |
| C  | 1.483486000  | -0.607241000 | 0.317348000  |
| H  | 3.494095000  | -2.459565000 | -0.235367000 |
| H  | 3.270780000  | -1.468963000 | -1.667720000 |
| H  | 6.074071000  | -0.566810000 | 1.557777000  |
| H  | 7.490086000  | -1.309994000 | 0.809752000  |
| H  | 6.164269000  | -2.330585000 | 1.381187000  |
| H  | 5.506923000  | 0.517590000  | -2.591257000 |
| H  | 7.066170000  | 0.530101000  | -1.758477000 |
| H  | 5.654400000  | 1.254709000  | -0.983699000 |
| H  | 5.997493000  | -3.645765000 | -1.501791000 |
| H  | 7.311410000  | -2.598949000 | -2.057180000 |
| H  | 5.770884000  | -2.616803000 | -2.926728000 |
| H  | 0.746624000  | 1.897062000  | -3.719719000 |
| H  | 1.642706000  | 0.812994000  | -2.661494000 |
| H  | 1.289062000  | 2.469339000  | -2.142476000 |
| H  | -0.357854000 | 3.885505000  | -1.379798000 |
| H  | -1.921025000 | 3.889375000  | -0.572142000 |
| H  | -1.844799000 | 3.864558000  | -2.335178000 |
| H  | -3.611148000 | 2.500902000  | 0.172216000  |
| H  | -4.480526000 | 1.009233000  | -0.218075000 |

|   |              |              |              |
|---|--------------|--------------|--------------|
| H | -4.352432000 | 2.298438000  | -1.408315000 |
| H | 3.169668000  | 0.597593000  | -0.237306000 |
| H | 3.439240000  | -0.369339000 | 1.199188000  |
| H | 1.075524000  | -0.572181000 | -0.716521000 |
| C | -1.554342000 | -0.548840000 | 3.285721000  |
| O | -2.025147000 | -0.312625000 | 1.913829000  |
| C | -3.418683000 | -0.743335000 | 1.808425000  |
| C | -3.652331000 | -1.631576000 | 3.015325000  |
| C | -2.789477000 | -0.949739000 | 4.077278000  |
| H | -0.814117000 | -1.351509000 | 3.241692000  |
| H | -1.087827000 | 0.371478000  | 3.644835000  |
| H | -4.045516000 | 0.152875000  | 1.833345000  |
| H | -3.530079000 | -1.243785000 | 0.847570000  |
| H | -4.710439000 | -1.681098000 | 3.286586000  |
| H | -3.295083000 | -2.648599000 | 2.820731000  |
| H | -3.297729000 | -0.066690000 | 4.480399000  |
| H | -2.535068000 | -1.607068000 | 4.912962000  |
| C | 1.575064000  | -2.263050000 | 2.219768000  |
| C | 1.009727000  | -1.827402000 | 0.996791000  |
| C | -0.075389000 | -2.568714000 | 0.482466000  |
| C | -0.587120000 | -3.678262000 | 1.166885000  |
| C | -0.011896000 | -4.089181000 | 2.363382000  |
| C | 1.080942000  | -3.379540000 | 2.879266000  |
| H | 2.431880000  | -1.738079000 | 2.632815000  |
| H | -0.462355000 | -2.342639000 | -0.510882000 |
| H | -1.402894000 | -4.246566000 | 0.729517000  |
| H | 1.554143000  | -3.710221000 | 3.800296000  |
| C | -0.389146000 | 4.451653000  | 1.633661000  |
| C | 0.449503000  | 3.405969000  | 1.213994000  |
| C | 1.605037000  | 3.743731000  | 0.489510000  |
| C | 1.903604000  | 5.071574000  | 0.193094000  |
| C | 1.056086000  | 6.097363000  | 0.612033000  |
| C | -0.090907000 | 5.778950000  | 1.338397000  |
| H | -1.279198000 | 4.219953000  | 2.216612000  |
| H | 2.283173000  | 2.963714000  | 0.150518000  |
| H | 2.805406000  | 5.305872000  | -0.366869000 |
| H | -0.753698000 | 6.567931000  | 1.684124000  |
| C | 0.129722000  | 2.022756000  | 1.613275000  |
| C | 1.123078000  | 1.040675000  | 1.774636000  |
| H | -0.761728000 | 1.936829000  | 2.241397000  |
| H | 1.000898000  | 0.279580000  | 2.543678000  |
| H | 2.155041000  | 1.335129000  | 1.618543000  |
| C | -0.322158000 | -1.271820000 | -2.972458000 |
| H | -0.786373000 | -2.243237000 | -2.783732000 |

|    |              |              |              |
|----|--------------|--------------|--------------|
| H  | -0.402235000 | -1.080726000 | -4.050441000 |
| H  | 0.747866000  | -1.372411000 | -2.755132000 |
| Si | -3.617867000 | -1.471160000 | -2.112865000 |
| C  | -5.373569000 | -1.042874000 | -1.531153000 |
| H  | -5.717825000 | -0.082578000 | -1.927034000 |
| H  | -6.040413000 | -1.816489000 | -1.932127000 |
| H  | -5.508673000 | -1.037070000 | -0.444535000 |
| C  | -3.673434000 | -1.510853000 | -4.006748000 |
| H  | -2.746159000 | -1.883330000 | -4.452078000 |
| H  | -4.487504000 | -2.166194000 | -4.338564000 |
| H  | -3.864441000 | -0.510091000 | -4.409989000 |
| C  | -3.240493000 | -3.217061000 | -1.460041000 |
| H  | -2.274529000 | -3.609640000 | -1.794676000 |
| H  | -3.269995000 | -3.264396000 | -0.365629000 |
| H  | -4.012360000 | -3.900329000 | -1.834829000 |
| H  | -0.382610000 | -4.971561000 | 2.877117000  |
| H  | 1.291524000  | 7.132402000  | 0.381908000  |

**SP2<sub>iso</sub><sup>a</sup>,  $E_{(\text{SCF Done})} = -2105.769367$  a.u.**

|    |              |              |              |
|----|--------------|--------------|--------------|
| Sc | -0.890547000 | 0.086182000  | 0.030062000  |
| Si | 6.147298000  | -0.277925000 | -0.237514000 |
| C  | 4.241232000  | -0.451763000 | -0.080827000 |
| C  | 6.835496000  | 0.552197000  | 1.322463000  |
| C  | 6.563716000  | 0.764699000  | -1.766082000 |
| C  | 6.867549000  | -2.020777000 | -0.418673000 |
| C  | 0.189656000  | 0.953825000  | -3.260226000 |
| C  | -0.768574000 | 0.140262000  | -2.442769000 |
| C  | -2.091956000 | 0.519458000  | -2.076587000 |
| C  | -2.709164000 | -0.600569000 | -1.447080000 |
| C  | -1.778823000 | -1.695897000 | -1.417009000 |
| C  | -0.572513000 | -1.210325000 | -2.037027000 |
| C  | -2.784687000 | 1.799288000  | -2.437395000 |
| C  | -4.154306000 | -0.607387000 | -1.032468000 |
| C  | 3.479668000  | 0.864879000  | 0.062518000  |
| C  | 1.935691000  | 0.747519000  | 0.173528000  |
| H  | 4.042043000  | -1.106744000 | 0.779137000  |
| H  | 3.888707000  | -0.996604000 | -0.970071000 |
| H  | 6.456472000  | 1.573415000  | 1.445040000  |
| H  | 7.928680000  | 0.613867000  | 1.270865000  |
| H  | 6.579251000  | -0.015492000 | 2.224660000  |
| H  | 6.155222000  | 0.317979000  | -2.680180000 |
| H  | 7.649820000  | 0.839881000  | -1.892977000 |
| H  | 6.172937000  | 1.785559000  | -1.683825000 |
| H  | 6.626089000  | -2.645227000 | 0.449333000  |

|   |              |              |              |
|---|--------------|--------------|--------------|
| H | 7.959487000  | -1.982575000 | -0.505286000 |
| H | 6.482327000  | -2.523233000 | -1.313547000 |
| H | 0.069932000  | 0.720833000  | -4.326982000 |
| H | 1.236220000  | 0.750031000  | -3.008896000 |
| H | 0.016871000  | 2.025895000  | -3.142230000 |
| H | -2.078888000 | 2.596048000  | -2.676169000 |
| H | -3.426880000 | 2.176601000  | -1.634746000 |
| H | -3.424784000 | 1.642768000  | -3.316272000 |
| H | -4.491621000 | 0.389623000  | -0.729161000 |
| H | -4.359000000 | -1.299931000 | -0.213735000 |
| H | -4.794326000 | -0.906925000 | -1.873067000 |
| H | 3.687065000  | 1.514318000  | -0.798533000 |
| H | 3.829477000  | 1.413003000  | 0.948345000  |
| H | 1.612507000  | 0.165243000  | -0.711746000 |
| C | -3.105321000 | 0.911509000  | 2.228357000  |
| O | -2.241918000 | -0.161043000 | 1.730756000  |
| C | -2.611319000 | -1.427077000 | 2.367921000  |
| C | -3.606916000 | -1.052908000 | 3.455961000  |
| C | -4.274520000 | 0.198969000  | 2.882602000  |
| H | -2.522699000 | 1.495902000  | 2.947901000  |
| H | -3.375273000 | 1.543438000  | 1.379715000  |
| H | -3.053191000 | -2.062281000 | 1.595720000  |
| H | -1.694845000 | -1.883811000 | 2.743539000  |
| H | -4.313662000 | -1.863074000 | 3.654640000  |
| H | -3.085925000 | -0.818167000 | 4.390724000  |
| H | -5.029899000 | -0.068383000 | 2.136039000  |
| H | -4.751331000 | 0.818970000  | 3.646518000  |
| C | 1.586539000  | 0.532103000  | 2.691332000  |
| C | 1.539143000  | -0.042978000 | 1.407652000  |
| C | 1.195034000  | -1.403050000 | 1.305839000  |
| C | 0.950454000  | -2.175549000 | 2.451689000  |
| C | 1.025242000  | -1.592130000 | 3.711107000  |
| C | 1.335957000  | -0.231802000 | 3.825489000  |
| H | 1.850792000  | 1.581003000  | 2.798385000  |
| H | 1.221800000  | -1.890853000 | 0.330693000  |
| H | 0.736799000  | -3.235568000 | 2.348828000  |
| H | 1.400843000  | 0.228002000  | 4.808133000  |
| C | -1.887064000 | 4.016516000  | 0.793763000  |
| C | -0.893829000 | 3.466517000  | -0.038980000 |
| C | -0.558331000 | 4.207173000  | -1.188387000 |
| C | -1.204715000 | 5.400142000  | -1.503827000 |
| C | -2.210422000 | 5.904133000  | -0.680299000 |
| C | -2.541504000 | 5.205202000  | 0.478825000  |
| H | -2.123613000 | 3.522880000  | 1.734044000  |



|    |              |              |              |
|----|--------------|--------------|--------------|
| H  | 0.227304000  | 3.855680000  | -1.851798000 |
| H  | -0.913104000 | 5.943239000  | -2.399510000 |
| H  | -3.297189000 | 5.597592000  | 1.155202000  |
| C  | -0.236250000 | 2.175592000  | 0.312257000  |
| C  | 1.285004000  | 2.144926000  | 0.090570000  |
| H  | -0.410612000 | 2.006420000  | 1.401388000  |
| H  | 1.795898000  | 2.820076000  | 0.796802000  |
| H  | 1.521209000  | 2.532697000  | -0.905241000 |
| C  | 0.641290000  | -2.023191000 | -2.398197000 |
| H  | 0.739577000  | -2.923991000 | -1.786209000 |
| H  | 0.581201000  | -2.350717000 | -3.444316000 |
| H  | 1.573924000  | -1.454856000 | -2.306840000 |
| Si | -2.156574000 | -3.560924000 | -1.190325000 |
| C  | -3.946587000 | -3.908761000 | -0.663967000 |
| H  | -4.673211000 | -3.495457000 | -1.370110000 |
| H  | -4.078208000 | -4.997993000 | -0.662705000 |
| H  | -4.205092000 | -3.556716000 | 0.340735000  |
| C  | -1.916287000 | -4.387405000 | -2.878319000 |
| H  | -0.877146000 | -4.362466000 | -3.219621000 |
| H  | -2.222364000 | -5.438838000 | -2.822300000 |
| H  | -2.534073000 | -3.899761000 | -3.640689000 |
| C  | -1.029414000 | -4.397327000 | 0.092142000  |
| H  | 0.035981000  | -4.316447000 | -0.148558000 |
| H  | -1.187967000 | -3.987608000 | 1.095808000  |
| H  | -1.270382000 | -5.466408000 | 0.133969000  |
| H  | 0.859670000  | -2.190475000 | 4.602865000  |
| H  | -2.711124000 | 6.835970000  | -0.926696000 |

***di*CIS<sub>t</sub>,  $E_{(\text{SCF Done})} = -1228.666384$  a.u**

|    |              |              |              |
|----|--------------|--------------|--------------|
| C  | 0.358590000  | -1.430574000 | 0.000018000  |
| C  | -0.988898000 | -1.042431000 | 0.000053000  |
| C  | -1.296653000 | 0.327467000  | 0.000060000  |
| C  | -0.273221000 | 1.264684000  | 0.000019000  |
| C  | 1.070930000  | 0.892465000  | -0.000025000 |
| C  | 1.362927000  | -0.467915000 | -0.000023000 |
| H  | 0.623099000  | -2.483510000 | 0.000018000  |
| H  | -2.326349000 | 0.666649000  | 0.000111000  |
| H  | 1.859096000  | 1.636083000  | -0.000053000 |
| C  | -2.020062000 | -2.089945000 | 0.000084000  |
| C  | -3.346962000 | -1.919910000 | -0.000075000 |
| H  | -1.630917000 | -3.107827000 | 0.000241000  |
| H  | -4.015622000 | -2.775389000 | -0.000033000 |
| H  | -3.819914000 | -0.941357000 | -0.000261000 |
| Cl | 3.030934000  | -0.974495000 | -0.000071000 |

|    |              |             |             |
|----|--------------|-------------|-------------|
| Cl | -0.671481000 | 2.962865000 | 0.000031000 |
|----|--------------|-------------|-------------|

***diTS2***<sup>a</sup><sub>syn</sub>,  $E_{(\text{SCF Done})} = -3944.078188$  a.u. **IF** =  $i122.30$  cm<sup>-1</sup>

|    |              |              |              |
|----|--------------|--------------|--------------|
| Sc | 0.031748000  | -1.139448000 | -0.192515000 |
| Si | 3.115984000  | 4.348626000  | -1.882370000 |
| C  | 1.982749000  | 3.172490000  | -0.863333000 |
| C  | 3.060523000  | 3.852645000  | -3.712506000 |
| C  | 4.890671000  | 4.233360000  | -1.227162000 |
| C  | 2.442364000  | 6.103790000  | -1.661589000 |
| C  | 1.841837000  | -2.708126000 | -0.864446000 |
| C  | 0.881333000  | -2.700608000 | -1.931046000 |
| C  | -0.340094000 | -3.272849000 | -1.460021000 |
| C  | -0.153211000 | -3.632620000 | -0.096229000 |
| C  | 1.169818000  | -3.270281000 | 0.279222000  |
| C  | 1.129192000  | -2.323704000 | -3.365436000 |
| C  | -1.524807000 | -3.650489000 | -2.302671000 |
| C  | -1.088168000 | -4.444734000 | 0.749327000  |
| C  | 1.776841000  | -3.654080000 | 1.600969000  |
| C  | 2.344234000  | 1.689036000  | -0.976248000 |
| C  | 1.475639000  | 0.640041000  | -0.254895000 |
| H  | 0.950930000  | 3.370713000  | -1.188057000 |
| H  | 2.048205000  | 3.503872000  | 0.181023000  |
| H  | 3.480089000  | 2.854263000  | -3.882582000 |
| H  | 3.647412000  | 4.557351000  | -4.312896000 |
| H  | 2.035872000  | 3.863832000  | -4.102581000 |
| H  | 4.939475000  | 4.487713000  | -0.162084000 |
| H  | 5.540409000  | 4.934299000  | -1.763786000 |
| H  | 5.314123000  | 3.230614000  | -1.356573000 |
| H  | 1.415411000  | 6.187909000  | -2.035378000 |
| H  | 3.055561000  | 6.825230000  | -2.213603000 |
| H  | 2.444431000  | 6.405138000  | -0.607808000 |
| H  | 1.870879000  | -1.529617000 | -3.467799000 |
| H  | 0.216967000  | -1.995551000 | -3.874798000 |
| H  | 1.503699000  | -3.187783000 | -3.930217000 |
| H  | -1.593591000 | -3.058890000 | -3.220484000 |
| H  | -2.477669000 | -3.551545000 | -1.771459000 |
| H  | -1.444945000 | -4.700023000 | -2.615781000 |
| H  | -0.779836000 | -5.498985000 | 0.739588000  |
| H  | -2.118457000 | -4.416946000 | 0.383317000  |
| H  | -1.087675000 | -4.128028000 | 1.797502000  |
| H  | 1.115273000  | -3.440384000 | 2.448307000  |
| H  | 2.725041000  | -3.148462000 | 1.790571000  |
| H  | 1.977788000  | -4.733676000 | 1.626227000  |
| H  | 3.368585000  | 1.566819000  | -0.592701000 |

|    |              |              |              |
|----|--------------|--------------|--------------|
| H  | 2.400821000  | 1.404293000  | -2.035507000 |
| H  | 2.044770000  | -0.313815000 | -0.340449000 |
| C  | -1.537788000 | -0.997682000 | 2.696984000  |
| O  | -1.650586000 | -1.181111000 | 1.245325000  |
| C  | -3.022219000 | -1.590823000 | 0.923124000  |
| C  | -3.602645000 | -2.092884000 | 2.230179000  |
| C  | -2.950503000 | -1.149078000 | 3.241272000  |
| H  | -0.862920000 | -1.771665000 | 3.074768000  |
| H  | -1.106628000 | -0.013770000 | 2.871786000  |
| H  | -3.550560000 | -0.708438000 | 0.558339000  |
| H  | -2.964432000 | -2.335243000 | 0.128265000  |
| H  | -4.694467000 | -2.033080000 | 2.233085000  |
| H  | -3.314553000 | -3.132406000 | 2.419056000  |
| H  | -3.463654000 | -0.181532000 | 3.250111000  |
| H  | -2.949098000 | -1.543333000 | 4.261012000  |
| C  | 0.436364000  | 1.982726000  | 1.640798000  |
| C  | 1.184757000  | 0.872737000  | 1.182543000  |
| C  | 1.701877000  | -0.020223000 | 2.146840000  |
| C  | 1.524609000  | 0.228879000  | 3.512988000  |
| C  | 0.843692000  | 1.351542000  | 3.962092000  |
| C  | 0.298480000  | 2.215909000  | 3.002550000  |
| H  | 0.001645000  | 2.681405000  | 0.936889000  |
| H  | 2.345177000  | -0.838914000 | 1.842254000  |
| C  | -3.756487000 | -0.217401000 | -2.177166000 |
| C  | -2.620600000 | 0.408386000  | -1.637066000 |
| C  | -2.799307000 | 1.517705000  | -0.794807000 |
| C  | -4.082374000 | 1.977552000  | -0.513516000 |
| C  | -5.216477000 | 1.364318000  | -1.044381000 |
| C  | -5.027766000 | 0.264524000  | -1.880411000 |
| H  | -3.649564000 | -1.065065000 | -2.846826000 |
| H  | -1.948943000 | 2.022581000  | -0.349748000 |
| C  | -1.290367000 | -0.100341000 | -2.006674000 |
| C  | -0.134368000 | 0.666921000  | -1.992658000 |
| H  | -1.292329000 | -0.984337000 | -2.638214000 |
| H  | 0.698185000  | 0.361849000  | -2.617865000 |
| H  | -0.176235000 | 1.725792000  | -1.767652000 |
| Si | 3.756799000  | -2.611916000 | -1.032243000 |
| C  | 4.353982000  | -4.408773000 | -0.994062000 |
| H  | 5.441100000  | -4.449045000 | -1.129560000 |
| H  | 4.117622000  | -4.896963000 | -0.042751000 |
| H  | 3.892902000  | -4.994677000 | -1.796838000 |
| C  | 4.624038000  | -1.643468000 | 0.356111000  |
| H  | 4.336563000  | -0.586840000 | 0.389148000  |
| H  | 4.494911000  | -2.068442000 | 1.356359000  |

|    |              |              |              |
|----|--------------|--------------|--------------|
| H  | 5.699814000  | -1.670606000 | 0.141246000  |
| C  | 4.334334000  | -1.810541000 | -2.649824000 |
| H  | 5.430967000  | -1.786441000 | -2.627960000 |
| H  | 4.040858000  | -2.376761000 | -3.538432000 |
| H  | 3.993162000  | -0.775700000 | -2.766365000 |
| H  | -6.210172000 | 1.734506000  | -0.820554000 |
| H  | 0.733663000  | 1.556316000  | 5.021008000  |
| Cl | 2.201034000  | -0.874816000 | 4.670177000  |
| Cl | -0.576392000 | 3.611365000  | 3.544232000  |
| Cl | -4.280141000 | 3.349398000  | 0.536277000  |
| Cl | -6.416176000 | -0.522259000 | -2.566032000 |

***diTS2***<sub>iso</sub>,  $E_{(\text{SCF Done})} = -3944.073131$  a.u.  $\text{IF} = i217.18\text{cm}^{-1}$

|    |              |              |              |
|----|--------------|--------------|--------------|
| Sc | -0.199011000 | -1.035601000 | -0.078109000 |
| Si | 1.027718000  | 5.182028000  | 1.202111000  |
| C  | 0.237896000  | 3.749982000  | 0.185131000  |
| C  | 2.828364000  | 4.761508000  | 1.617526000  |
| C  | 0.030641000  | 5.431669000  | 2.794959000  |
| C  | 0.949909000  | 6.735164000  | 0.123453000  |
| C  | 0.211297000  | -0.534651000 | 3.390901000  |
| C  | 0.158409000  | -1.557730000 | 2.289246000  |
| C  | 1.308399000  | -2.070017000 | 1.636054000  |
| C  | 0.890774000  | -3.120986000 | 0.759530000  |
| C  | -0.519264000 | -3.263392000 | 0.893074000  |
| C  | -1.002307000 | -2.284291000 | 1.832421000  |
| C  | 2.729621000  | -1.742086000 | 1.982788000  |
| C  | 1.825361000  | -4.025926000 | 0.010822000  |
| C  | -1.340279000 | -4.346257000 | 0.249858000  |
| C  | 0.152836000  | 2.413325000  | 0.925027000  |
| C  | -0.569451000 | 1.222247000  | 0.249274000  |
| H  | 0.804527000  | 3.669387000  | -0.753536000 |
| H  | -0.767877000 | 4.092215000  | -0.090987000 |
| H  | 2.910623000  | 3.875040000  | 2.257092000  |
| H  | 3.297139000  | 5.593807000  | 2.155336000  |
| H  | 3.419613000  | 4.582643000  | 0.712028000  |
| H  | -1.027874000 | 5.620100000  | 2.581130000  |
| H  | 0.413804000  | 6.296394000  | 3.348939000  |
| H  | 0.094539000  | 4.564091000  | 3.461863000  |
| H  | 1.511835000  | 6.604358000  | -0.808518000 |
| H  | 1.380673000  | 7.593370000  | 0.651701000  |
| H  | -0.083297000 | 6.991056000  | -0.137780000 |
| H  | 1.091281000  | 0.109873000  | 3.302513000  |
| H  | 0.280452000  | -1.028770000 | 4.369217000  |
| H  | -0.672609000 | 0.107545000  | 3.419154000  |

|   |               |               |               |
|---|---------------|---------------|---------------|
| H | 2. 876312000  | -0. 684451000 | 2. 219039000  |
| H | 3. 423937000  | -1. 999879000 | 1. 180763000  |
| H | 3. 027629000  | -2. 313867000 | 2. 872306000  |
| H | 2. 671766000  | -3. 478682000 | -0. 413463000 |
| H | 1. 332071000  | -4. 569030000 | -0. 801589000 |
| H | 2. 241361000  | -4. 784215000 | 0. 687409000  |
| H | -1. 699036000 | -5. 057662000 | 1. 003843000  |
| H | -0. 755176000 | -4. 927349000 | -0. 468657000 |
| H | -2. 222922000 | -3. 958419000 | -0. 267519000 |
| H | -0. 376183000 | 2. 592733000  | 1. 872780000  |
| H | 1. 156960000  | 2. 076609000  | 1. 216200000  |
| H | -0. 794343000 | 0. 541902000  | 1. 118936000  |
| C | -2. 668074000 | -1. 484277000 | -2. 268460000 |
| O | -1. 271581000 | -1. 748582000 | -1. 884353000 |
| C | -0. 689368000 | -2. 711606000 | -2. 821066000 |
| C | -1. 875807000 | -3. 364597000 | -3. 504332000 |
| C | -2. 863167000 | -2. 200066000 | -3. 596878000 |
| H | -3. 303646000 | -1. 893333000 | -1. 478371000 |
| H | -2. 798811000 | -0. 403558000 | -2. 324368000 |
| H | -0. 071895000 | -2. 155005000 | -3. 535184000 |
| H | -0. 061923000 | -3. 393833000 | -2. 244503000 |
| H | -1. 605631000 | -3. 776085000 | -4. 480623000 |
| H | -2. 280147000 | -4. 175299000 | -2. 888917000 |
| H | -2. 604351000 | -1. 540887000 | -4. 432703000 |
| H | -3. 898428000 | -2. 525150000 | -3. 729706000 |
| C | -1. 957212000 | 2. 266999000  | -1. 597728000 |
| C | -1. 871401000 | 1. 490707000  | -0. 423066000 |
| C | -3. 063487000 | 0. 970560000  | 0. 116607000  |
| C | -4. 290704000 | 1. 229491000  | -0. 497216000 |
| C | -4. 377969000 | 1. 992126000  | -1. 656635000 |
| C | -3. 193220000 | 2. 504607000  | -2. 190044000 |
| H | -1. 073672000 | 2. 712207000  | -2. 038045000 |
| H | -3. 044625000 | 0. 411887000  | 1. 047147000  |
| C | 3. 889077000  | -1. 462044000 | -1. 643352000 |
| C | 3. 076194000  | -0. 451129000 | -1. 105067000 |
| C | 3. 675248000  | 0. 533144000  | -0. 304463000 |
| C | 5. 042530000  | 0. 486895000  | -0. 051309000 |
| C | 5. 856098000  | -0. 518901000 | -0. 569070000 |
| C | 5. 253819000  | -1. 485621000 | -1. 370834000 |
| H | 3. 467875000  | -2. 213951000 | -2. 303878000 |
| H | 3. 089184000  | 1. 336837000  | 0. 128553000  |
| C | 1. 647730000  | -0. 423396000 | -1. 462939000 |
| C | 0. 865464000  | 0. 740935000  | -1. 452822000 |
| H | 1. 356017000  | -1. 192627000 | -2. 181288000 |

|    |              |              |              |
|----|--------------|--------------|--------------|
| H  | 0.041691000  | 0.808205000  | -2.159787000 |
| H  | 1.324437000  | 1.692636000  | -1.209945000 |
| Si | -2.677930000 | -2.441190000 | 2.755131000  |
| C  | -4.126431000 | -2.792898000 | 1.580436000  |
| H  | -4.251478000 | -2.016702000 | 0.817546000  |
| H  | -4.045789000 | -3.764370000 | 1.084004000  |
| H  | -5.050585000 | -2.808056000 | 2.170923000  |
| C  | -3.133590000 | -0.915512000 | 3.786443000  |
| H  | -4.140647000 | -1.081499000 | 4.188680000  |
| H  | -2.464337000 | -0.780919000 | 4.641572000  |
| H  | -3.166658000 | 0.024967000  | 3.226274000  |
| C  | -2.471994000 | -3.898428000 | 3.949224000  |
| H  | -3.392385000 | -4.044765000 | 4.526806000  |
| H  | -2.253611000 | -4.835646000 | 3.426459000  |
| H  | -1.657271000 | -3.712496000 | 4.657767000  |
| H  | -5.335093000 | 2.198278000  | -2.121938000 |
| H  | 6.919327000  | -0.543572000 | -0.361705000 |
| Cl | -5.748518000 | 0.602817000  | 0.209163000  |
| Cl | -3.271931000 | 3.470454000  | -3.629752000 |
| Cl | 6.232748000  | -2.747354000 | -2.056366000 |
| Cl | 5.759847000  | 1.713800000  | 0.950827000  |

**3,5-diFSt**,  $E_{(\text{SCF Done})} = -507.9582172$  a.u.

|   |              |              |              |
|---|--------------|--------------|--------------|
| C | 0.009711000  | -1.347677000 | 0.000013000  |
| C | -0.982888000 | -0.356083000 | 0.000044000  |
| C | -0.593429000 | 0.993362000  | 0.000049000  |
| C | 0.754206000  | 1.309953000  | 0.000011000  |
| C | 1.756352000  | 0.345264000  | -0.000028000 |
| C | 1.347995000  | -0.980443000 | -0.000025000 |
| H | -0.252091000 | -2.401151000 | 0.000012000  |
| H | -1.320002000 | 1.798058000  | 0.000096000  |
| H | 2.805293000  | 0.617221000  | -0.000054000 |
| C | -2.391127000 | -0.776246000 | 0.000074000  |
| C | -3.471384000 | 0.012851000  | -0.000075000 |
| H | -2.541382000 | -1.855597000 | 0.000222000  |
| H | -4.470300000 | -0.412981000 | -0.000036000 |
| H | -3.411810000 | 1.098148000  | -0.000249000 |
| F | 1.116646000  | 2.602663000  | 0.000019000  |
| F | 2.284872000  | -1.941505000 | -0.000060000 |

**diFTS2<sup>a</sup><sub>syn</sub>**,  $E_{(\text{SCF Done})} = -2502.66011$  a.u. IF =  $i141.94\text{cm}^{-1}$

|    |              |              |              |
|----|--------------|--------------|--------------|
| Sc | -0.403545000 | -1.006466000 | -0.161239000 |
| Si | 4.121228000  | 3.774079000  | -0.671134000 |
| C  | 2.654681000  | 2.797107000  | 0.102389000  |

|   |              |              |              |
|---|--------------|--------------|--------------|
| C | 3.976715000  | 3.742298000  | -2.561690000 |
| C | 5.758419000  | 2.988731000  | -0.126737000 |
| C | 4.003545000  | 5.553981000  | -0.037254000 |
| C | 1.156905000  | -2.861490000 | -0.744270000 |
| C | 0.478552000  | -2.476184000 | -1.951151000 |
| C | -0.904668000 | -2.812083000 | -1.831826000 |
| C | -1.099333000 | -3.401977000 | -0.550893000 |
| C | 0.151982000  | -3.414718000 | 0.122235000  |
| C | 1.110939000  | -1.980634000 | -3.222190000 |
| C | -1.921932000 | -2.769239000 | -2.937075000 |
| C | -2.316139000 | -4.135175000 | -0.063237000 |
| C | 0.352110000  | -4.121557000 | 1.434447000  |
| C | 2.661726000  | 1.296495000  | -0.208340000 |
| C | 1.492442000  | 0.400169000  | 0.231887000  |
| H | 1.732900000  | 3.288119000  | -0.242846000 |
| H | 2.709603000  | 2.959757000  | 1.185874000  |
| H | 4.057500000  | 2.727387000  | -2.968034000 |
| H | 4.780454000  | 4.336455000  | -3.011712000 |
| H | 3.024671000  | 4.169049000  | -2.898478000 |
| H | 5.844671000  | 2.958967000  | 0.965729000  |
| H | 6.604384000  | 3.572255000  | -0.507895000 |
| H | 5.871009000  | 1.965759000  | -0.503840000 |
| H | 3.052555000  | 6.020307000  | -0.319566000 |
| H | 4.809830000  | 6.167894000  | -0.454615000 |
| H | 4.088012000  | 5.594656000  | 1.054777000  |
| H | 2.017278000  | -1.400358000 | -3.040199000 |
| H | 0.429933000  | -1.359869000 | -3.813924000 |
| H | 1.395884000  | -2.825908000 | -3.862803000 |
| H | -1.616676000 | -2.109981000 | -3.754854000 |
| H | -2.911644000 | -2.442049000 | -2.601080000 |
| H | -2.046844000 | -3.768628000 | -3.374556000 |
| H | -2.078404000 | -5.200064000 | 0.058237000  |
| H | -3.144730000 | -4.081857000 | -0.775529000 |
| H | -2.674762000 | -3.784298000 | 0.911809000  |
| H | -0.417390000 | -3.865693000 | 2.171121000  |
| H | 1.323503000  | -3.910296000 | 1.885674000  |
| H | 0.298933000  | -5.208987000 | 1.287815000  |
| H | 3.564630000  | 0.871619000  | 0.254763000  |
| H | 2.805048000  | 1.146404000  | -1.287309000 |
| H | 1.829730000  | -0.640325000 | 0.069556000  |
| C | -2.707344000 | -0.211396000 | 2.032996000  |
| O | -2.414524000 | -0.796189000 | 0.720992000  |
| C | -3.682003000 | -1.078262000 | 0.033927000  |
| C | -4.742173000 | -1.013441000 | 1.116315000  |

|    |              |              |              |
|----|--------------|--------------|--------------|
| C  | -4.196290000 | 0.087572000  | 2.025583000  |
| H  | -2.446569000 | -0.958973000 | 2.786411000  |
| H  | -2.076430000 | 0.669944000  | 2.151180000  |
| H  | -3.825142000 | -0.303718000 | -0.722501000 |
| H  | -3.586351000 | -2.051363000 | -0.441900000 |
| H  | -5.726549000 | -0.779193000 | 0.701907000  |
| H  | -4.813818000 | -1.965805000 | 1.654237000  |
| H  | -4.391609000 | 1.075181000  | 1.595129000  |
| H  | -4.616247000 | 0.062662000  | 3.034821000  |
| C  | 0.494854000  | 1.712405000  | 2.180169000  |
| C  | 0.913888000  | 0.502224000  | 1.569858000  |
| C  | 0.689035000  | -0.706536000 | 2.284454000  |
| C  | 0.144430000  | -0.665591000 | 3.575057000  |
| C  | -0.196285000 | 0.512571000  | 4.204910000  |
| C  | -0.002402000 | 1.689247000  | 3.470211000  |
| H  | 0.606421000  | 2.667025000  | 1.683892000  |
| H  | 1.157565000  | -1.632304000 | 1.963833000  |
| C  | -3.324317000 | 1.414720000  | -2.488415000 |
| C  | -2.199480000 | 1.466699000  | -1.646761000 |
| C  | -2.191414000 | 2.388887000  | -0.587280000 |
| C  | -3.278435000 | 3.232735000  | -0.406132000 |
| C  | -4.398155000 | 3.206202000  | -1.228378000 |
| C  | -4.385651000 | 2.284109000  | -2.268303000 |
| H  | -3.365054000 | 0.736734000  | -3.335439000 |
| H  | -1.353937000 | 2.461119000  | 0.098891000  |
| C  | -1.048572000 | 0.594486000  | -1.928812000 |
| C  | 0.259996000  | 0.978713000  | -1.659686000 |
| H  | -1.203642000 | -0.167604000 | -2.689310000 |
| H  | 1.063633000  | 0.508841000  | -2.216413000 |
| H  | 0.464597000  | 1.984964000  | -1.313582000 |
| Si | 3.040326000  | -3.176581000 | -0.502001000 |
| C  | 3.275215000  | -5.051698000 | -0.628000000 |
| H  | 4.339184000  | -5.302280000 | -0.542804000 |
| H  | 2.742329000  | -5.587609000 | 0.164354000  |
| H  | 2.916782000  | -5.430524000 | -1.591450000 |
| C  | 3.714083000  | -2.579169000 | 1.175128000  |
| H  | 3.620414000  | -1.496830000 | 1.316724000  |
| H  | 3.272374000  | -3.077599000 | 2.043800000  |
| H  | 4.786715000  | -2.810101000 | 1.193137000  |
| C  | 4.116566000  | -2.341325000 | -1.819590000 |
| H  | 5.162546000  | -2.573824000 | -1.584220000 |
| H  | 3.920992000  | -2.713259000 | -2.829513000 |
| H  | 4.023226000  | -1.249634000 | -1.824735000 |
| H  | -5.234844000 | 3.877301000  | -1.073646000 |



|   |              |              |              |
|---|--------------|--------------|--------------|
| H | -0.581321000 | 0.534369000  | 5.217786000  |
| F | -0.026834000 | -1.822942000 | 4.223450000  |
| F | -0.340577000 | 2.842904000  | 4.046318000  |
| F | -5.440147000 | 2.228488000  | -3.087550000 |
| F | -3.253042000 | 4.097017000  | 0.616890000  |

***diFTS2***<sup>a</sup><sub>iso</sub>,  $E_{(\text{SCF Done})} = -2502.660582$  a.u. IF =  $i247.28$  cm<sup>-1</sup>

|    |              |              |              |
|----|--------------|--------------|--------------|
| Sc | -0.707781000 | 0.339349000  | 0.119105000  |
| Si | 5.027390000  | -2.515938000 | -1.222642000 |
| C  | 3.134351000  | -2.332796000 | -0.942218000 |
| C  | 5.894355000  | -2.766054000 | 0.445163000  |
| C  | 5.689942000  | -0.952640000 | -2.068258000 |
| C  | 5.294063000  | -4.024323000 | -2.334812000 |
| C  | 1.240501000  | 1.435198000  | -2.649335000 |
| C  | -0.152384000 | 1.270940000  | -2.115048000 |
| C  | -0.915798000 | 2.273660000  | -1.447598000 |
| C  | -2.222845000 | 1.751563000  | -1.225629000 |
| C  | -2.302456000 | 0.426513000  | -1.782216000 |
| C  | -0.997110000 | 0.147289000  | -2.326961000 |
| C  | -0.540636000 | 3.716582000  | -1.303888000 |
| C  | -3.331827000 | 2.587641000  | -0.649894000 |
| C  | 2.710042000  | -1.177236000 | -0.025368000 |
| C  | 1.198264000  | -1.065635000 | 0.155669000  |
| H  | 2.758528000  | -3.283643000 | -0.539304000 |
| H  | 2.665176000  | -2.217841000 | -1.930907000 |
| H  | 5.780301000  | -1.897338000 | 1.104065000  |
| H  | 6.969027000  | -2.918254000 | 0.292412000  |
| H  | 5.509550000  | -3.646992000 | 0.972109000  |
| H  | 5.186707000  | -0.770123000 | -3.025073000 |
| H  | 6.761064000  | -1.057752000 | -2.276060000 |
| H  | 5.566839000  | -0.060114000 | -1.443614000 |
| H  | 4.902832000  | -4.937328000 | -1.871561000 |
| H  | 6.362056000  | -4.180482000 | -2.525303000 |
| H  | 4.799444000  | -3.899701000 | -3.304963000 |
| H  | 1.210848000  | 1.815073000  | -3.679554000 |
| H  | 1.790880000  | 0.488697000  | -2.679482000 |
| H  | 1.824365000  | 2.147838000  | -2.060655000 |
| H  | 0.539075000  | 3.867845000  | -1.250739000 |
| H  | -0.983466000 | 4.184097000  | -0.421148000 |
| H  | -0.906852000 | 4.266874000  | -2.181833000 |
| H  | -2.997201000 | 3.167396000  | 0.218124000  |
| H  | -4.193623000 | 1.992479000  | -0.349553000 |
| H  | -3.685843000 | 3.315701000  | -1.392248000 |
| H  | 3.081444000  | -0.226646000 | -0.429658000 |

|    |              |              |              |
|----|--------------|--------------|--------------|
| H  | 3.191183000  | -1.294949000 | 0.954297000  |
| H  | 0.766573000  | -0.902554000 | -0.856400000 |
| C  | -1.824899000 | -0.458416000 | 3.083399000  |
| O  | -2.187059000 | -0.008511000 | 1.731285000  |
| C  | -3.643949000 | -0.068159000 | 1.586714000  |
| C  | -4.104553000 | -1.022401000 | 2.670179000  |
| C  | -3.143159000 | -0.684826000 | 3.810935000  |
| H  | -1.250642000 | -1.381596000 | 2.973089000  |
| H  | -1.203351000 | 0.314282000  | 3.542427000  |
| H  | -4.034531000 | 0.942721000  | 1.738768000  |
| H  | -3.853095000 | -0.395537000 | 0.569308000  |
| H  | -5.153415000 | -0.862009000 | 2.934378000  |
| H  | -3.985119000 | -2.061234000 | 2.345240000  |
| H  | -3.463227000 | 0.227080000  | 4.326602000  |
| H  | -3.058691000 | -1.482395000 | 4.553728000  |
| C  | 1.020794000  | -2.776617000 | 1.983786000  |
| C  | 0.494253000  | -2.175466000 | 0.820055000  |
| C  | -0.781683000 | -2.581642000 | 0.370653000  |
| C  | -1.491362000 | -3.536621000 | 1.101604000  |
| C  | -0.986967000 | -4.142067000 | 2.238804000  |
| C  | 0.288713000  | -3.748699000 | 2.644450000  |
| H  | 2.005723000  | -2.522160000 | 2.359200000  |
| H  | -1.180526000 | -2.261661000 | -0.590760000 |
| C  | 0.591871000  | 4.192752000  | 1.825587000  |
| C  | 1.159945000  | 3.010889000  | 1.325737000  |
| C  | 2.371841000  | 3.093194000  | 0.621212000  |
| C  | 2.972318000  | 4.331207000  | 0.434982000  |
| C  | 2.425923000  | 5.514991000  | 0.914222000  |
| C  | 1.230842000  | 5.407323000  | 1.613455000  |
| H  | -0.329868000 | 4.178557000  | 2.399648000  |
| H  | 2.864631000  | 2.215722000  | 0.216098000  |
| C  | 0.506411000  | 1.724854000  | 1.624597000  |
| C  | 1.231996000  | 0.522125000  | 1.714174000  |
| H  | -0.380810000 | 1.816332000  | 2.257033000  |
| H  | 0.922999000  | -0.229876000 | 2.438622000  |
| H  | 2.306001000  | 0.567502000  | 1.569537000  |
| C  | -0.606410000 | -1.044102000 | -3.159904000 |
| H  | -1.249233000 | -1.910309000 | -2.984688000 |
| H  | -0.679220000 | -0.797638000 | -4.226976000 |
| H  | 0.428507000  | -1.360808000 | -2.988551000 |
| Si | -3.882863000 | -0.469004000 | -2.422706000 |
| C  | -5.506247000 | 0.288320000  | -1.793096000 |
| H  | -5.612929000 | 1.339687000  | -2.077340000 |
| H  | -6.318784000 | -0.262205000 | -2.283879000 |

|   |              |              |              |
|---|--------------|--------------|--------------|
| H | -5.672755000 | 0.202170000  | -0.714343000 |
| C | -3.879755000 | -0.231223000 | -4.303257000 |
| H | -3.041745000 | -0.736351000 | -4.793207000 |
| H | -4.805140000 | -0.639953000 | -4.726312000 |
| H | -3.834303000 | 0.832192000  | -4.563279000 |
| C | -3.939219000 | -2.321369000 | -2.021379000 |
| H | -3.127117000 | -2.892525000 | -2.483268000 |
| H | -3.928186000 | -2.530334000 | -0.948096000 |
| H | -4.877179000 | -2.725056000 | -2.422425000 |
| F | -2.711964000 | -3.896450000 | 0.680044000  |
| F | 0.811878000  | -4.326063000 | 3.726044000  |
| F | 4.125524000  | 4.384154000  | -0.243303000 |
| F | 0.670747000  | 6.518939000  | 2.103220000  |
| H | -1.538853000 | -4.910575000 | 2.767568000  |
| H | 2.911785000  | 6.470933000  | 0.759180000  |

2,3,4,5,6-pentafluoro styrene,  $E_{(\text{SCF Done})} = -805.6436917$  a.u.

|   |              |              |              |
|---|--------------|--------------|--------------|
| C | -0.115116000 | 1.316254000  | -0.000007000 |
| C | -1.116164000 | 0.331449000  | -0.000010000 |
| C | -0.662931000 | -0.996337000 | -0.000005000 |
| C | 0.688029000  | -1.323102000 | 0.000004000  |
| C | 1.647338000  | -0.314860000 | 0.000009000  |
| C | 1.241237000  | 1.015187000  | 0.000003000  |
| C | -2.519803000 | 0.750835000  | -0.000029000 |
| C | -3.615459000 | -0.020356000 | 0.000027000  |
| H | -2.651038000 | 1.829433000  | -0.000092000 |
| H | -4.596640000 | 0.445459000  | 0.000004000  |
| H | -3.586799000 | -1.102421000 | 0.000097000  |
| F | 1.068824000  | -2.600154000 | 0.000007000  |
| F | 2.149630000  | 1.989809000  | 0.000007000  |
| F | 2.941145000  | -0.621708000 | 0.000019000  |
| F | -1.530164000 | -2.014429000 | -0.000014000 |
| F | -0.457025000 | 2.610162000  | -0.000013000 |

***pantaTS2***<sub>syn</sub>,  $E_{(\text{SCF Done})} = -3098.026967$  a.u. IF =  $i126.60$  cm<sup>-1</sup>

|    |              |              |              |
|----|--------------|--------------|--------------|
| Sc | 0.201667000  | 1.130954000  | 0.195176000  |
| Si | -4.497844000 | -2.109105000 | -2.682540000 |
| C  | -2.858960000 | -2.022830000 | -1.680931000 |
| C  | -4.505468000 | -0.747022000 | -4.004795000 |
| C  | -5.978665000 | -1.895371000 | -1.517747000 |
| C  | -4.555571000 | -3.809793000 | -3.511247000 |
| C  | -1.577910000 | 2.834696000  | 0.393231000  |
| C  | -0.946127000 | 3.025946000  | -0.882917000 |
| C  | 0.396079000  | 3.465991000  | -0.674250000 |

|   |              |              |              |
|---|--------------|--------------|--------------|
| C | 0.614714000  | 3.542639000  | 0.731391000  |
| C | -0.575711000 | 3.127593000  | 1.386032000  |
| C | -1.586596000 | 2.935445000  | -2.239979000 |
| C | 1.327735000  | 4.003842000  | -1.721492000 |
| C | 1.783135000  | 4.193571000  | 1.411468000  |
| C | -0.753940000 | 3.161968000  | 2.878861000  |
| C | -2.678990000 | -0.744322000 | -0.861116000 |
| C | -1.384870000 | -0.507489000 | -0.042556000 |
| H | -2.042023000 | -2.167416000 | -2.396865000 |
| H | -2.848984000 | -2.901289000 | -1.023940000 |
| H | -4.494818000 | 0.259215000  | -3.569430000 |
| H | -5.407662000 | -0.822672000 | -4.622681000 |
| H | -3.641459000 | -0.838032000 | -4.673761000 |
| H | -5.975291000 | -2.651453000 | -0.723924000 |
| H | -6.917090000 | -2.006525000 | -2.073200000 |
| H | -5.995429000 | -0.906962000 | -1.044097000 |
| H | -3.703055000 | -3.956844000 | -4.184250000 |
| H | -5.470114000 | -3.920467000 | -4.105013000 |
| H | -4.541756000 | -4.616603000 | -2.769570000 |
| H | -2.425146000 | 2.237179000  | -2.257304000 |
| H | -0.873984000 | 2.624976000  | -3.012458000 |
| H | -1.974616000 | 3.913866000  | -2.552425000 |
| H | 1.086310000  | 3.642134000  | -2.724857000 |
| H | 2.376714000  | 3.760804000  | -1.527938000 |
| H | 1.251584000  | 5.098860000  | -1.757731000 |
| H | 1.518061000  | 5.223796000  | 1.685575000  |
| H | 2.663187000  | 4.263093000  | 0.764592000  |
| H | 2.069561000  | 3.690308000  | 2.340882000  |
| H | 0.119274000  | 2.762590000  | 3.408862000  |
| H | -1.625440000 | 2.592531000  | 3.206176000  |
| H | -0.883766000 | 4.194556000  | 3.228893000  |
| H | -3.514924000 | -0.690838000 | -0.147932000 |
| H | -2.801122000 | 0.132016000  | -1.511053000 |
| H | -1.680769000 | 0.373245000  | 0.588985000  |
| C | 1.977685000  | -0.243358000 | 2.630138000  |
| O | 1.957205000  | 0.634754000  | 1.449280000  |
| C | 3.301779000  | 1.179248000  | 1.249553000  |
| C | 3.929774000  | 1.149160000  | 2.626733000  |
| C | 3.400058000  | -0.177016000 | 3.178583000  |
| H | 1.237669000  | 0.150744000  | 3.330495000  |
| H | 1.688272000  | -1.243175000 | 2.304055000  |
| H | 3.830928000  | 0.526444000  | 0.550468000  |
| H | 3.191696000  | 2.169973000  | 0.810930000  |
| H | 5.021578000  | 1.183096000  | 2.577798000  |

|    |               |               |               |
|----|---------------|---------------|---------------|
| H  | 3. 586579000  | 1. 995667000  | 3. 231695000  |
| H  | 3. 996802000  | -1. 013615000 | 2. 800737000  |
| H  | 3. 411363000  | -0. 221051000 | 4. 270701000  |
| C  | -0. 592626000 | -2. 888982000 | 0. 556013000  |
| C  | -0. 992318000 | -1. 589662000 | 0. 912954000  |
| C  | -1. 065258000 | -1. 365982000 | 2. 297782000  |
| C  | -0. 816644000 | -2. 333420000 | 3. 260925000  |
| C  | -0. 452544000 | -3. 613809000 | 2. 855579000  |
| C  | -0. 332320000 | -3. 883425000 | 1. 493930000  |
| C  | 3. 629528000  | 0. 641813000  | -2. 403117000 |
| C  | 2. 563119000  | -0. 049126000 | -1. 805957000 |
| C  | 2. 910476000  | -1. 239124000 | -1. 155221000 |
| C  | 4. 211695000  | -1. 722367000 | -1. 098916000 |
| C  | 5. 238985000  | -1. 010461000 | -1. 714697000 |
| C  | 4. 942195000  | 0. 184876000  | -2. 366466000 |
| C  | 1. 195607000  | 0. 479848000  | -1. 929579000 |
| C  | 0. 036791000  | -0. 292131000 | -1. 941666000 |
| H  | 1. 141996000  | 1. 452044000  | -2. 409272000 |
| H  | -0. 839270000 | 0. 117235000  | -2. 432792000 |
| H  | 0. 073834000  | -1. 369746000 | -1. 871330000 |
| Si | -3. 462689000 | 2. 911251000  | 0. 793544000  |
| C  | -3. 731192000 | 4. 633347000  | 1. 538419000  |
| H  | -4. 799945000 | 4. 794234000  | 1. 722947000  |
| H  | -3. 207248000 | 4. 761799000  | 2. 490799000  |
| H  | -3. 388088000 | 5. 416599000  | 0. 853378000  |
| C  | -4. 065148000 | 1. 603919000  | 2. 030475000  |
| H  | -3. 935289000 | 0. 579399000  | 1. 668295000  |
| H  | -3. 592242000 | 1. 677787000  | 3. 013848000  |
| H  | -5. 141005000 | 1. 761168000  | 2. 177382000  |
| C  | -4. 561203000 | 2. 782448000  | -0. 744397000 |
| H  | -5. 597835000 | 2. 918607000  | -0. 411685000 |
| H  | -4. 352157000 | 3. 565961000  | -1. 478968000 |
| H  | -4. 509177000 | 1. 810686000  | -1. 245035000 |
| F  | -0. 892959000 | -2. 030814000 | 4. 554077000  |
| F  | 0. 044078000  | -5. 090577000 | 1. 092290000  |
| F  | 5. 909027000  | 0. 879882000  | -2. 952961000 |
| F  | 4. 478084000  | -2. 846317000 | -0. 439637000 |
| F  | 3. 390424000  | 1. 792716000  | -3. 043545000 |
| F  | 6. 485123000  | -1. 458177000 | -1. 667279000 |
| F  | 1. 968062000  | -1. 929985000 | -0. 487739000 |
| F  | -0. 191250000 | -4. 553007000 | 3. 751439000  |
| F  | -1. 352766000 | -0. 121318000 | 2. 746146000  |
| F  | -0. 417229000 | -3. 225288000 | -0. 725802000 |

*pantaTS2*<sup>a</sup><sub>iso</sub>,  $E_{(\text{SCF Done})} = -3098.031006$  a.u. IF =  $i221.20$  cm<sup>-1</sup>

|    |              |              |              |
|----|--------------|--------------|--------------|
| Sc | 0.095544000  | -0.877458000 | 0.112976000  |
| Si | -1.213263000 | 5.203738000  | 1.797845000  |
| C  | -1.612517000 | 3.387458000  | 1.306506000  |
| C  | -0.988032000 | 6.236456000  | 0.224090000  |
| C  | 0.371352000  | 5.249448000  | 2.838877000  |
| C  | -2.675637000 | 5.851121000  | 2.811460000  |
| C  | 1.663164000  | 0.827382000  | 2.806750000  |
| C  | 1.199794000  | -0.504688000 | 2.293399000  |
| C  | 2.016300000  | -1.442227000 | 1.592540000  |
| C  | 1.252547000  | -2.629174000 | 1.393082000  |
| C  | -0.043888000 | -2.456211000 | 1.989482000  |
| C  | -0.055214000 | -1.122474000 | 2.543261000  |
| C  | 3.500899000  | -1.339430000 | 1.421063000  |
| C  | 1.834025000  | -3.866776000 | 0.767433000  |
| C  | -0.574932000 | 2.709571000  | 0.401193000  |
| C  | -0.939031000 | 1.272554000  | 0.011480000  |
| H  | -2.594391000 | 3.396444000  | 0.812604000  |
| H  | -1.746209000 | 2.810320000  | 2.233912000  |
| H  | -0.107018000 | 5.922444000  | -0.347538000 |
| H  | -0.853164000 | 7.294354000  | 0.477031000  |
| H  | -1.862539000 | 6.161560000  | -0.432374000 |
| H  | 0.276228000  | 4.635215000  | 3.742109000  |
| H  | 0.584017000  | 6.275363000  | 3.161004000  |
| H  | 1.243397000  | 4.897304000  | 2.275936000  |
| H  | -3.603271000 | 5.841593000  | 2.227832000  |
| H  | -2.496224000 | 6.883848000  | 3.131713000  |
| H  | -2.837605000 | 5.248250000  | 3.712467000  |
| H  | 2.252684000  | 0.694850000  | 3.723920000  |
| H  | 0.828787000  | 1.488147000  | 3.058405000  |
| H  | 2.300821000  | 1.351660000  | 2.088728000  |
| H  | 3.841008000  | -0.314633000 | 1.256276000  |
| H  | 3.873386000  | -1.961012000 | 0.603690000  |
| H  | 3.987591000  | -1.695317000 | 2.339792000  |
| H  | 2.460835000  | -3.628874000 | -0.099070000 |
| H  | 1.069108000  | -4.574597000 | 0.448225000  |
| H  | 2.477159000  | -4.392147000 | 1.486249000  |
| H  | 0.395241000  | 2.675897000  | 0.907742000  |
| H  | -0.430222000 | 3.315885000  | -0.496846000 |
| H  | -1.033849000 | 0.734221000  | 0.984726000  |
| C  | -0.926876000 | -1.807796000 | -2.951668000 |
| O  | -0.656688000 | -2.183697000 | -1.557202000 |
| C  | -1.138881000 | -3.551024000 | -1.334101000 |
| C  | -2.099542000 | -3.822185000 | -2.475279000 |

|    |              |              |              |
|----|--------------|--------------|--------------|
| C  | -1.430731000 | -3.073167000 | -3.628429000 |
| H  | -1.687667000 | -1.021361000 | -2.936612000 |
| H  | -0.004314000 | -1.419184000 | -3.387572000 |
| H  | -0.270221000 | -4.214930000 | -1.363989000 |
| H  | -1.592087000 | -3.578044000 | -0.343800000 |
| H  | -2.210732000 | -4.892732000 | -2.667560000 |
| H  | -3.089268000 | -3.407529000 | -2.255745000 |
| H  | -0.594247000 | -3.653854000 | -4.032228000 |
| H  | -2.114495000 | -2.844951000 | -4.450371000 |
| C  | -2.763309000 | 1.924164000  | -1.688464000 |
| C  | -2.211009000 | 1.062918000  | -0.728518000 |
| C  | -2.936063000 | -0.113334000 | -0.523622000 |
| C  | -4.122537000 | -0.440032000 | -1.152687000 |
| C  | -4.650098000 | 0.458455000  | -2.079903000 |
| C  | -3.962615000 | 1.640419000  | -2.343581000 |
| C  | 4.001903000  | -0.621067000 | -1.754158000 |
| C  | 3.040548000  | 0.298602000  | -1.310977000 |
| C  | 3.551439000  | 1.484829000  | -0.771426000 |
| C  | 4.914513000  | 1.740301000  | -0.667648000 |
| C  | 5.833860000  | 0.800169000  | -1.126075000 |
| C  | 5.368908000  | -0.394520000 | -1.670501000 |
| C  | 1.621382000  | -0.014631000 | -1.517355000 |
| C  | 0.594826000  | 0.942487000  | -1.602692000 |
| H  | 1.486329000  | -0.932311000 | -2.088447000 |
| H  | -0.225865000 | 0.752443000  | -2.290294000 |
| H  | 0.833207000  | 1.989398000  | -1.478951000 |
| C  | -1.143777000 | -0.520974000 | 3.388966000  |
| H  | -2.133782000 | -0.899806000 | 3.125460000  |
| H  | -0.972626000 | -0.754517000 | 4.447384000  |
| H  | -1.175181000 | 0.570782000  | 3.314613000  |
| Si | -1.245240000 | -3.835333000 | 2.597179000  |
| C  | -0.826552000 | -5.557324000 | 1.916367000  |
| H  | 0.181030000  | -5.879994000 | 2.195811000  |
| H  | -1.530475000 | -6.259947000 | 2.379831000  |
| H  | -0.936272000 | -5.666331000 | 0.832303000  |
| C  | -1.013109000 | -3.927949000 | 4.475843000  |
| H  | -1.358405000 | -3.026089000 | 4.990307000  |
| H  | -1.585497000 | -4.774199000 | 4.874127000  |
| H  | 0.039722000  | -4.085123000 | 4.734907000  |
| C  | -3.079729000 | -3.515609000 | 2.222302000  |
| H  | -3.456671000 | -2.591074000 | 2.669949000  |
| H  | -3.316102000 | -3.490570000 | 1.153799000  |
| H  | -3.652894000 | -4.341756000 | 2.661254000  |
| F  | -4.727356000 | -1.602251000 | -0.912843000 |

|   |              |              |              |
|---|--------------|--------------|--------------|
| F | -4.444780000 | 2.495854000  | -3.233869000 |
| F | 5.337785000  | 2.882300000  | -0.135940000 |
| F | 6.228453000  | -1.312437000 | -2.099513000 |
| F | -5.774102000 | 0.174430000  | -2.720395000 |
| F | -2.157915000 | 3.070817000  | -2.009763000 |
| F | -2.395161000 | -1.028863000 | 0.342112000  |
| F | 3.591815000  | -1.795995000 | -2.266391000 |
| F | 7.135581000  | 1.034509000  | -1.033338000 |
| F | 2.714409000  | 2.426633000  | -0.295391000 |

4-trifluoromethyl-2,3,5,6-tetrafluoro styrene,  $E_{(\text{SCF Done})} = -1043.438848$  a.u.

|   |              |              |              |
|---|--------------|--------------|--------------|
| C | 1.101783000  | 1.329190000  | 0.000079000  |
| C | 1.917299000  | 0.189466000  | 0.000152000  |
| C | 1.239172000  | -1.038225000 | 0.000127000  |
| C | -0.145792000 | -1.110231000 | 0.000046000  |
| C | -0.943634000 | 0.037080000  | 0.000080000  |
| C | -0.288680000 | 1.268437000  | -0.000017000 |
| C | 3.371358000  | 0.360478000  | 0.000330000  |
| C | 4.313056000  | -0.592817000 | -0.000499000 |
| H | 3.688234000  | 1.399516000  | 0.001179000  |
| H | 5.361240000  | -0.308117000 | -0.000255000 |
| H | 4.093050000  | -1.652710000 | -0.001461000 |
| F | -0.716908000 | -2.315035000 | -0.000062000 |
| F | -0.954025000 | 2.421661000  | -0.000260000 |
| F | 1.913761000  | -2.192866000 | 0.000173000  |
| F | 1.663888000  | 2.543851000  | 0.000041000  |
| C | -2.444033000 | -0.131648000 | -0.000020000 |
| F | -2.843251000 | -0.820982000 | 1.083011000  |
| F | -3.093965000 | 1.037023000  | 0.001127000  |
| F | -2.843466000 | -0.819103000 | -1.084155000 |

**tetraTS2<sup>a</sup>**<sub>syn</sub>,  $E_{(\text{SCF Done})} = -3573.617342$  a.u. IF =  $i98.26$  cm<sup>-1</sup>

|    |              |              |              |
|----|--------------|--------------|--------------|
| Sc | -0.575189000 | -1.129290000 | -0.800023000 |
| Si | -4.247250000 | 0.507000000  | 4.153199000  |
| C  | -2.758490000 | 0.876435000  | 2.996324000  |
| C  | -4.459563000 | -1.367898000 | 4.364549000  |
| C  | -5.829084000 | 1.261788000  | 3.429860000  |
| C  | -3.855101000 | 1.296806000  | 5.828578000  |
| C  | -2.662071000 | -2.208533000 | -1.524076000 |
| C  | -2.031573000 | -3.091433000 | -0.580366000 |
| C  | -0.820326000 | -3.590815000 | -1.152476000 |
| C  | -0.687484000 | -3.022587000 | -2.451428000 |
| C  | -1.791019000 | -2.155726000 | -2.668553000 |
| C  | -2.596244000 | -3.582235000 | 0.723269000  |



|   |              |              |              |
|---|--------------|--------------|--------------|
| C | 0.026351000  | -4.706283000 | -0.608658000 |
| C | 0.276480000  | -3.444353000 | -3.521558000 |
| C | -2.030981000 | -1.454775000 | -3.976301000 |
| C | -2.927473000 | 0.361719000  | 1.562362000  |
| C | -1.801653000 | 0.391123000  | 0.497234000  |
| H | -1.868081000 | 0.466677000  | 3.487058000  |
| H | -2.631386000 | 1.962361000  | 3.000875000  |
| H | -4.734500000 | -1.868118000 | 3.428592000  |
| H | -5.257555000 | -1.576507000 | 5.086602000  |
| H | -3.543560000 | -1.834555000 | 4.746270000  |
| H | -5.716968000 | 2.340365000  | 3.269084000  |
| H | -6.667627000 | 1.118087000  | 4.121058000  |
| H | -6.112389000 | 0.805003000  | 2.474473000  |
| H | -2.946009000 | 0.872338000  | 6.270021000  |
| H | -4.675403000 | 1.132002000  | 6.536543000  |
| H | -3.709659000 | 2.379164000  | 5.735953000  |
| H | -3.261301000 | -2.855153000 | 1.192153000  |
| H | -1.812912000 | -3.836876000 | 1.445332000  |
| H | -3.181458000 | -4.497980000 | 0.566262000  |
| H | -0.119922000 | -4.858467000 | 0.464404000  |
| H | 1.097874000  | -4.556950000 | -0.777568000 |
| H | -0.246560000 | -5.651524000 | -1.096316000 |
| H | -0.253426000 | -4.050638000 | -4.268300000 |
| H | 1.087433000  | -4.068259000 | -3.134589000 |
| H | 0.713830000  | -2.598612000 | -4.063312000 |
| H | -1.110453000 | -1.021044000 | -4.383688000 |
| H | -2.764839000 | -0.651372000 | -3.893914000 |
| H | -2.401606000 | -2.165109000 | -4.726834000 |
| H | -3.780914000 | 0.901731000  | 1.125174000  |
| H | -3.249551000 | -0.687189000 | 1.596261000  |
| H | -2.343936000 | -0.007731000 | -0.391761000 |
| C | 1.782354000  | 0.688927000  | -2.325151000 |
| O | 1.385109000  | -0.614851000 | -1.764225000 |
| C | 2.504835000  | -1.543052000 | -1.935436000 |
| C | 3.268625000  | -1.005006000 | -3.125731000 |
| C | 3.193034000  | 0.501827000  | -2.872975000 |
| H | 1.064092000  | 0.931273000  | -3.109500000 |
| H | 1.724529000  | 1.424498000  | -1.521707000 |
| H | 3.113587000  | -1.510466000 | -1.029083000 |
| H | 2.086373000  | -2.540116000 | -2.058069000 |
| H | 4.294973000  | -1.380964000 | -3.155509000 |
| H | 2.774868000  | -1.275724000 | -4.065630000 |
| H | 3.941335000  | 0.803239000  | -2.132648000 |
| H | 3.352606000  | 1.097893000  | -3.775257000 |

|    |              |              |              |
|----|--------------|--------------|--------------|
| C  | -0.725535000 | 2.732706000  | 0.859152000  |
| C  | -1.195161000 | 1.670217000  | 0.067896000  |
| C  | -1.011080000 | 1.892132000  | -1.303590000 |
| C  | -0.556445000 | 3.058443000  | -1.888172000 |
| C  | -0.182804000 | 4.130372000  | -1.076560000 |
| C  | -0.255256000 | 3.919392000  | 0.304003000  |
| C  | 3.076977000  | -2.462418000 | 1.475704000  |
| C  | 2.109303000  | -1.458847000 | 1.344352000  |
| C  | 2.604607000  | -0.151974000 | 1.274502000  |
| C  | 3.959707000  | 0.132141000  | 1.319206000  |
| C  | 4.913654000  | -0.880749000 | 1.459063000  |
| C  | 4.442775000  | -2.192825000 | 1.535841000  |
| C  | 0.688460000  | -1.819176000 | 1.313531000  |
| C  | -0.325340000 | -1.032330000 | 1.824853000  |
| H  | 0.492653000  | -2.880445000 | 1.197439000  |
| H  | -1.260656000 | -1.503441000 | 2.104958000  |
| H  | -0.121108000 | -0.073835000 | 2.282485000  |
| Si | -4.515901000 | -1.689264000 | -1.633755000 |
| C  | -5.229225000 | -2.664406000 | -3.093530000 |
| H  | -6.310214000 | -2.491220000 | -3.154781000 |
| H  | -4.793483000 | -2.372907000 | -4.053949000 |
| H  | -5.071475000 | -3.740603000 | -2.961082000 |
| C  | -4.768949000 | 0.168953000  | -1.933901000 |
| H  | -4.453406000 | 0.781521000  | -1.082606000 |
| H  | -4.263163000 | 0.543692000  | -2.829087000 |
| H  | -5.842759000 | 0.345013000  | -2.073423000 |
| C  | -5.517374000 | -2.166777000 | -0.099001000 |
| H  | -6.566435000 | -1.921951000 | -0.307072000 |
| H  | -5.471225000 | -3.238889000 | 0.115047000  |
| H  | -5.231061000 | -1.616743000 | 0.802428000  |
| F  | -0.447970000 | 3.088968000  | -3.215756000 |
| F  | 0.152789000  | 4.867952000  | 1.137104000  |
| F  | 5.262756000  | -3.228231000 | 1.659819000  |
| F  | 4.342793000  | 1.401085000  | 1.196882000  |
| F  | 2.688889000  | -3.742010000 | 1.535136000  |
| F  | 1.751707000  | 0.873765000  | 1.082760000  |
| F  | -1.242789000 | 0.813766000  | -2.137078000 |
| F  | -0.676269000 | 2.630519000  | 2.188708000  |
| C  | 6.377948000  | -0.494863000 | 1.477814000  |
| F  | 7.178837000  | -1.543083000 | 1.670655000  |
| F  | 6.713859000  | 0.073160000  | 0.304359000  |
| F  | 6.615528000  | 0.398027000  | 2.446757000  |
| C  | 0.377324000  | 5.432767000  | -1.605424000 |
| F  | -0.199070000 | 6.476848000  | -1.000302000 |

|   |             |             |              |
|---|-------------|-------------|--------------|
| F | 0.182470000 | 5.557909000 | -2.922301000 |
| F | 1.699563000 | 5.498214000 | -1.374737000 |

**tatraTS2<sup>a</sup>**<sub>iso</sub>,  $E_{(\text{SCF Done})} = -3573.622969$  a.u.  $\text{IF} = i218.98$  cm<sup>-1</sup>

|    |              |              |              |
|----|--------------|--------------|--------------|
| Sc | -0.080562000 | -0.958509000 | 0.307367000  |
| Si | -0.532529000 | 5.195989000  | 2.194460000  |
| C  | -1.189333000 | 3.456269000  | 1.703522000  |
| C  | -0.368502000 | 6.262076000  | 0.635999000  |
| C  | 1.152459000  | 5.020045000  | 3.046665000  |
| C  | -1.788467000 | 5.960588000  | 3.387196000  |
| C  | 1.909144000  | 0.498058000  | 2.866826000  |
| C  | 1.235989000  | -0.755517000 | 2.390164000  |
| C  | 1.864075000  | -1.780038000 | 1.620883000  |
| C  | 0.940517000  | -2.858005000 | 1.484751000  |
| C  | -0.270781000 | -2.527572000 | 2.182630000  |
| C  | -0.066119000 | -1.208475000 | 2.736268000  |
| C  | 3.328599000  | -1.865716000 | 1.318253000  |
| C  | 1.310216000  | -4.155932000 | 0.822094000  |
| C  | -0.318669000 | 2.692032000  | 0.696027000  |
| C  | -0.874828000 | 1.315644000  | 0.318090000  |
| H  | -2.201735000 | 3.594147000  | 1.298261000  |
| H  | -1.310505000 | 2.869846000  | 2.626658000  |
| H  | 0.384353000  | 5.867194000  | -0.055998000 |
| H  | -0.064658000 | 7.281161000  | 0.901724000  |
| H  | -1.320810000 | 6.330748000  | 0.097690000  |
| H  | 1.085994000  | 4.392977000  | 3.943661000  |
| H  | 1.521059000  | 6.003145000  | 3.361505000  |
| H  | 1.908429000  | 4.586629000  | 2.381712000  |
| H  | -2.772651000 | 6.069108000  | 2.917199000  |
| H  | -1.461514000 | 6.957262000  | 3.705009000  |
| H  | -1.910971000 | 5.349141000  | 4.288686000  |
| H  | 2.558731000  | 0.273807000  | 3.723454000  |
| H  | 1.192846000  | 1.253694000  | 3.200699000  |
| H  | 2.539617000  | 0.952073000  | 2.096831000  |
| H  | 3.787364000  | -0.885050000 | 1.173962000  |
| H  | 3.541440000  | -2.480458000 | 0.440448000  |
| H  | 3.839366000  | -2.336758000 | 2.169554000  |
| H  | 1.861778000  | -3.998139000 | -0.111668000 |
| H  | 0.440096000  | -4.774240000 | 0.604103000  |
| H  | 1.966607000  | -4.743731000 | 1.477780000  |
| H  | 0.682728000  | 2.537801000  | 1.110922000  |
| H  | -0.187252000 | 3.302181000  | -0.201372000 |
| H  | -0.952663000 | 0.763138000  | 1.283428000  |
| C  | -1.344942000 | -1.739240000 | -2.713477000 |

|    |              |              |              |
|----|--------------|--------------|--------------|
| O  | -1.053728000 | -2.148325000 | -1.331802000 |
| C  | -1.694488000 | -3.445513000 | -1.078255000 |
| C  | -2.699869000 | -3.621240000 | -2.200358000 |
| C  | -1.982469000 | -2.951170000 | -3.372262000 |
| H  | -2.035414000 | -0.891424000 | -2.667103000 |
| H  | -0.410031000 | -1.428507000 | -3.183521000 |
| H  | -0.909591000 | -4.205799000 | -1.107199000 |
| H  | -2.134942000 | -3.402524000 | -0.082726000 |
| H  | -2.923685000 | -4.675921000 | -2.381923000 |
| H  | -3.637879000 | -3.106546000 | -1.966592000 |
| H  | -1.214530000 | -3.612982000 | -3.787390000 |
| H  | -2.657078000 | -2.660236000 | -4.181838000 |
| C  | -2.733109000 | 2.186327000  | -1.236095000 |
| C  | -2.201852000 | 1.255010000  | -0.336007000 |
| C  | -3.018530000 | 0.140604000  | -0.122122000 |
| C  | -4.256028000 | -0.052874000 | -0.694052000 |
| C  | -4.778766000 | 0.900610000  | -1.574859000 |
| C  | -3.990321000 | 2.023150000  | -1.828956000 |
| C  | 3.714188000  | -1.024168000 | -1.826829000 |
| C  | 2.878941000  | -0.032064000 | -1.299658000 |
| C  | 3.541665000  | 1.083127000  | -0.773736000 |
| C  | 4.924776000  | 1.189067000  | -0.768340000 |
| C  | 5.740786000  | 0.189535000  | -1.305291000 |
| C  | 5.101340000  | -0.932023000 | -1.835473000 |
| C  | 1.428731000  | -0.203313000 | -1.409486000 |
| C  | 0.495963000  | 0.848294000  | -1.416876000 |
| H  | 1.166934000  | -1.100140000 | -1.969181000 |
| H  | -0.385199000 | 0.745611000  | -2.045884000 |
| H  | 0.840234000  | 1.866592000  | -1.301657000 |
| C  | -1.001491000 | -0.481181000 | 3.662787000  |
| H  | -2.051493000 | -0.686914000 | 3.441855000  |
| H  | -0.818251000 | -0.784864000 | 4.701120000  |
| H  | -0.860773000 | 0.603636000  | 3.628205000  |
| Si | -1.594794000 | -3.746079000 | 2.880327000  |
| C  | -1.488756000 | -5.489463000 | 2.137777000  |
| H  | -0.524050000 | -5.968249000 | 2.331301000  |
| H  | -2.254862000 | -6.094282000 | 2.638894000  |
| H  | -1.694676000 | -5.542283000 | 1.063804000  |
| C  | -1.209037000 | -3.916983000 | 4.727620000  |
| H  | -1.376736000 | -2.990386000 | 5.284920000  |
| H  | -1.856323000 | -4.686088000 | 5.165689000  |
| H  | -0.169726000 | -4.225802000 | 4.885054000  |
| C  | -3.389636000 | -3.162953000 | 2.670553000  |
| H  | -3.595162000 | -2.211013000 | 3.168854000  |

|   |              |              |              |
|---|--------------|--------------|--------------|
| H | -3.703118000 | -3.070770000 | 1.625905000  |
| H | -4.036657000 | -3.915663000 | 3.137927000  |
| F | -4.925161000 | -1.175833000 | -0.429680000 |
| F | -4.389645000 | 2.979032000  | -2.654601000 |
| F | 5.468210000  | 2.279432000  | -0.234857000 |
| F | 5.776843000  | -1.950475000 | -2.355728000 |
| F | -2.049860000 | 3.286117000  | -1.564733000 |
| F | -2.508152000 | -0.848865000 | 0.682835000  |
| F | 3.156775000  | -2.140256000 | -2.332067000 |
| F | 2.837238000  | 2.089416000  | -0.221859000 |
| C | 7.241448000  | 0.379228000  | -1.259968000 |
| C | -6.123347000 | 0.628779000  | -2.215257000 |
| F | 7.660181000  | 0.464948000  | 0.013870000  |
| F | 7.587741000  | 1.516367000  | -1.880773000 |
| F | 7.898549000  | -0.626074000 | -1.842479000 |
| F | -7.060184000 | 0.448372000  | -1.274796000 |
| F | -6.056854000 | -0.500214000 | -2.947121000 |
| F | -6.517622000 | 1.616413000  | -3.016295000 |

**TS1<sup>a</sup><sub>right-o</sub>**,  $E_{(\text{SCF Done})} = -2255.81641$  a.u. **IF = *i*203.39 cm<sup>-1</sup>**

|    |              |              |              |
|----|--------------|--------------|--------------|
| Sc | -0.128671000 | -0.229501000 | -0.304821000 |
| Si | -0.947851000 | 3.726052000  | 0.171534000  |
| C  | -0.519940000 | 1.855931000  | 0.193799000  |
| C  | -1.504579000 | 4.302315000  | -1.544801000 |
| C  | 0.576530000  | 4.713923000  | 0.712553000  |
| C  | -2.346242000 | 4.025257000  | 1.416615000  |
| C  | -0.856744000 | -0.538981000 | -3.845052000 |
| C  | -1.185912000 | -0.992912000 | -2.451713000 |
| C  | -2.194475000 | -0.433424000 | -1.622995000 |
| C  | -2.322685000 | -1.242613000 | -0.437312000 |
| C  | -1.378767000 | -2.320981000 | -0.580756000 |
| C  | -0.673502000 | -2.158740000 | -1.804113000 |
| C  | -3.055389000 | 0.725432000  | -2.037702000 |
| C  | -1.258629000 | -3.529548000 | 0.304975000  |
| C  | 0.305094000  | -3.135961000 | -2.389792000 |
| C  | 1.046808000  | 1.710713000  | -1.539388000 |
| C  | 1.695226000  | 0.491927000  | -1.705751000 |
| H  | -1.489271000 | 1.318491000  | 0.357779000  |
| H  | 0.118186000  | 1.700235000  | 1.085550000  |
| H  | -0.717483000 | 4.199331000  | -2.299677000 |
| H  | -1.766649000 | 5.365980000  | -1.495056000 |
| H  | -2.391166000 | 3.763216000  | -1.894113000 |
| H  | 0.925162000  | 4.406280000  | 1.705245000  |
| H  | 0.314607000  | 5.776903000  | 0.773946000  |

|    |              |              |              |
|----|--------------|--------------|--------------|
| H  | 1.416881000  | 4.629080000  | 0.014892000  |
| H  | -3.263139000 | 3.494450000  | 1.135728000  |
| H  | -2.587643000 | 5.093755000  | 1.465462000  |
| H  | -2.062933000 | 3.703699000  | 2.425423000  |
| H  | -0.815374000 | 0.551570000  | -3.940035000 |
| H  | -1.626328000 | -0.885617000 | -4.547106000 |
| H  | 0.095981000  | -0.940538000 | -4.204233000 |
| H  | -2.536726000 | 1.377660000  | -2.746677000 |
| H  | -3.377350000 | 1.338477000  | -1.193736000 |
| H  | -3.963668000 | 0.367673000  | -2.540786000 |
| H  | -2.010479000 | -4.278274000 | 0.024495000  |
| H  | -1.413806000 | -3.301027000 | 1.363784000  |
| H  | -0.285755000 | -4.020182000 | 0.200185000  |
| H  | 0.981362000  | -3.559977000 | -1.639537000 |
| H  | 0.920659000  | -2.682616000 | -3.172282000 |
| H  | -0.224487000 | -3.979030000 | -2.852944000 |
| H  | 1.493036000  | 2.529801000  | -0.994137000 |
| H  | 0.301432000  | 1.993785000  | -2.274738000 |
| H  | 1.381832000  | -0.086179000 | -2.572944000 |
| C  | 1.825003000  | -2.100468000 | 1.548325000  |
| O  | 0.898601000  | -0.962606000 | 1.493399000  |
| C  | 0.808031000  | -0.341338000 | 2.821935000  |
| C  | 1.460904000  | -1.334898000 | 3.766844000  |
| C  | 2.539115000  | -1.962713000 | 2.881779000  |
| H  | 1.224686000  | -3.012307000 | 1.497772000  |
| H  | 2.484823000  | -2.034084000 | 0.681084000  |
| H  | 1.357489000  | 0.603785000  | 2.777818000  |
| H  | -0.246959000 | -0.154908000 | 3.028117000  |
| H  | 1.867209000  | -0.840125000 | 4.653125000  |
| H  | 0.739025000  | -2.090059000 | 4.097247000  |
| H  | 3.401697000  | -1.295306000 | 2.786429000  |
| H  | 2.890703000  | -2.929098000 | 3.253343000  |
| C  | 3.715461000  | 0.541271000  | -0.065371000 |
| C  | 2.971082000  | 0.010080000  | -1.139947000 |
| C  | 3.542956000  | -1.116916000 | -1.775165000 |
| C  | 4.757679000  | -1.667368000 | -1.390429000 |
| C  | 5.467319000  | -1.104300000 | -0.330379000 |
| C  | 4.940216000  | 0.002170000  | 0.327710000  |
| H  | 3.012153000  | -1.547865000 | -2.619966000 |
| H  | 5.155260000  | -2.523981000 | -1.926859000 |
| H  | 5.480111000  | 0.467688000  | 1.146474000  |
| Si | -3.705149000 | -1.211864000 | 0.890427000  |
| C  | -4.689525000 | -2.825905000 | 0.762291000  |
| H  | -4.101262000 | -3.708261000 | 1.031888000  |

|    |              |              |              |
|----|--------------|--------------|--------------|
| H  | -5.549198000 | -2.781679000 | 1.441468000  |
| H  | -5.074264000 | -2.971574000 | -0.253232000 |
| C  | -4.919870000 | 0.223154000  | 0.663140000  |
| H  | -5.412248000 | 0.207893000  | -0.313791000 |
| H  | -5.702310000 | 0.119918000  | 1.425240000  |
| H  | -4.459728000 | 1.206658000  | 0.805869000  |
| C  | -2.981541000 | -1.041405000 | 2.641915000  |
| H  | -3.783926000 | -1.162716000 | 3.379560000  |
| H  | -2.214621000 | -1.789577000 | 2.870185000  |
| H  | -2.555284000 | -0.041875000 | 2.793254000  |
| Cl | 3.159861000  | 1.924195000  | 0.857766000  |
| H  | 6.425669000  | -1.511274000 | -0.022222000 |

**TS1<sup>a</sup><sub>left-m</sub>**,  $E_{(\text{SCF Done})} = -2255.815037$  a.u. **IF** =  $i427.99$  cm<sup>-1</sup>

|    |              |              |              |
|----|--------------|--------------|--------------|
| Sc | -0.219093000 | -0.301788000 | -0.190110000 |
| Si | -1.687474000 | 3.681573000  | -0.197447000 |
| C  | -1.185996000 | 1.859037000  | -0.085083000 |
| C  | -2.131349000 | 4.159681000  | -1.982426000 |
| C  | -0.294226000 | 4.810174000  | 0.441099000  |
| C  | -3.217474000 | 3.988153000  | 0.891748000  |
| C  | 0.245681000  | -2.270543000 | -3.209182000 |
| C  | -0.523197000 | -2.121837000 | -1.929067000 |
| C  | -1.760385000 | -1.452034000 | -1.757216000 |
| C  | -2.215979000 | -1.652742000 | -0.402693000 |
| C  | -1.210538000 | -2.471418000 | 0.239298000  |
| C  | -0.170114000 | -2.741816000 | -0.695018000 |
| C  | -2.481562000 | -0.716798000 | -2.853829000 |
| C  | -1.290076000 | -3.083718000 | 1.611249000  |
| C  | 0.990938000  | -3.673890000 | -0.495770000 |
| C  | 0.296075000  | 1.753477000  | -1.562197000 |
| C  | 1.309359000  | 0.744951000  | -1.621405000 |
| H  | -2.102387000 | 1.269615000  | -0.254550000 |
| H  | -0.872621000 | 1.703770000  | 0.968828000  |
| H  | -1.261711000 | 4.124914000  | -2.647041000 |
| H  | -2.534406000 | 5.178964000  | -2.014056000 |
| H  | -2.896079000 | 3.488969000  | -2.392140000 |
| H  | -0.012425000 | 4.544639000  | 1.467486000  |
| H  | -0.630489000 | 5.853950000  | 0.452387000  |
| H  | 0.608283000  | 4.763556000  | -0.178506000 |
| H  | -4.066991000 | 3.376119000  | 0.567043000  |
| H  | -3.525807000 | 5.040028000  | 0.842751000  |
| H  | -3.016077000 | 3.748684000  | 1.942705000  |
| H  | 0.076524000  | -1.437236000 | -3.899754000 |
| H  | -0.047654000 | -3.187487000 | -3.739838000 |

|    |              |              |              |
|----|--------------|--------------|--------------|
| H  | 1.325106000  | -2.336766000 | -3.031658000 |
| H  | -1.796740000 | -0.426936000 | -3.658029000 |
| H  | -2.970882000 | 0.194568000  | -2.498126000 |
| H  | -3.260762000 | -1.341766000 | -3.312362000 |
| H  | -1.707716000 | -4.100606000 | 1.575438000  |
| H  | -1.924114000 | -2.504854000 | 2.289594000  |
| H  | -0.302983000 | -3.168870000 | 2.081825000  |
| H  | 1.250734000  | -3.787383000 | 0.562345000  |
| H  | 1.891362000  | -3.332480000 | -1.018361000 |
| H  | 0.761601000  | -4.682314000 | -0.871893000 |
| H  | 0.619534000  | 2.754108000  | -1.286955000 |
| H  | -0.408350000 | 1.764729000  | -2.391280000 |
| H  | 1.251251000  | 0.031292000  | -2.440107000 |
| C  | 2.118394000  | -0.942345000 | 2.060725000  |
| O  | 0.827959000  | -0.310410000 | 1.824420000  |
| C  | 0.269350000  | 0.161541000  | 3.075347000  |
| C  | 1.150766000  | -0.432118000 | 4.166562000  |
| C  | 2.509656000  | -0.520153000 | 3.467701000  |
| H  | 1.979715000  | -2.026258000 | 1.983130000  |
| H  | 2.801113000  | -0.604108000 | 1.280967000  |
| H  | 0.310841000  | 1.257447000  | 3.073959000  |
| H  | -0.775243000 | -0.157376000 | 3.129695000  |
| H  | 1.162437000  | 0.189068000  | 5.067037000  |
| H  | 0.795712000  | -1.431193000 | 4.445040000  |
| H  | 3.000620000  | 0.459054000  | 3.444925000  |
| H  | 3.190834000  | -1.235385000 | 3.937799000  |
| C  | 2.874287000  | 1.853259000  | 0.018283000  |
| C  | 2.592469000  | 0.861378000  | -0.954415000 |
| C  | 3.645378000  | -0.033879000 | -1.269727000 |
| C  | 4.875138000  | 0.064680000  | -0.640010000 |
| C  | 5.146237000  | 1.038851000  | 0.325120000  |
| C  | 4.120506000  | 1.932363000  | 0.633485000  |
| H  | 2.106749000  | 2.572659000  | 0.290358000  |
| H  | 3.488936000  | -0.801069000 | -2.022904000 |
| Si | -3.923843000 | -1.314794000 | 0.331087000  |
| C  | -4.820894000 | -2.970198000 | 0.608161000  |
| H  | -4.271524000 | -3.619611000 | 1.298296000  |
| H  | -5.822121000 | -2.806200000 | 1.025435000  |
| H  | -4.932431000 | -3.510206000 | -0.339071000 |
| C  | -5.043722000 | -0.253427000 | -0.779968000 |
| H  | -5.210580000 | -0.705242000 | -1.762640000 |
| H  | -6.020103000 | -0.156397000 | -0.288590000 |
| H  | -4.651954000 | 0.758692000  | -0.930511000 |
| C  | -3.854004000 | -0.398648000 | 2.004699000  |



|    |              |              |              |
|----|--------------|--------------|--------------|
| H  | -4.875426000 | -0.214230000 | 2.361086000  |
| H  | -3.337863000 | -0.967516000 | 2.785868000  |
| H  | -3.359702000 | 0.574684000  | 1.903564000  |
| H  | 6.120309000  | 1.097898000  | 0.797810000  |
| H  | 4.302925000  | 2.714886000  | 1.367665000  |
| Cl | 6.142233000  | -1.069810000 | -1.074795000 |

**pC3<sup>a</sup>**<sub>syn</sub>,  $E_{(\text{SCF Done})} = -3794.045039$  a.u.

|    |              |              |              |
|----|--------------|--------------|--------------|
| Sc | 0.958573000  | -0.991181000 | -0.540093000 |
| Si | -4.700171000 | 4.983615000  | -0.014193000 |
| C  | -4.093376000 | 3.177425000  | -0.212252000 |
| C  | -3.334285000 | 6.033255000  | 0.788014000  |
| C  | -6.261768000 | 5.033750000  | 1.059370000  |
| C  | -5.083090000 | 5.660971000  | -1.744012000 |
| C  | -1.517913000 | -1.249199000 | -3.102494000 |
| C  | -0.307394000 | -1.894687000 | -2.495168000 |
| C  | -0.303312000 | -2.902487000 | -1.495730000 |
| C  | 1.053957000  | -3.333551000 | -1.272917000 |
| C  | 1.868037000  | -2.602882000 | -2.209767000 |
| C  | 1.037560000  | -1.713925000 | -2.943178000 |
| C  | -1.554283000 | -3.500586000 | -0.915472000 |
| C  | 3.290117000  | -2.911744000 | -2.587593000 |
| C  | 1.443409000  | -0.931765000 | -4.159415000 |
| C  | -3.730925000 | 2.464144000  | 1.093293000  |
| C  | -3.134048000 | 1.034902000  | 0.987016000  |
| H  | -3.230860000 | 3.203356000  | -0.895245000 |
| H  | -4.885906000 | 2.627969000  | -0.737645000 |
| H  | -3.086945000 | 5.679123000  | 1.795567000  |
| H  | -3.655552000 | 7.077464000  | 0.877649000  |
| H  | -2.416393000 | 6.020900000  | 0.187866000  |
| H  | -7.055282000 | 4.407789000  | 0.635040000  |
| H  | -6.648355000 | 6.057038000  | 1.130322000  |
| H  | -6.065988000 | 4.683608000  | 2.079112000  |
| H  | -4.196091000 | 5.641054000  | -2.388135000 |
| H  | -5.429624000 | 6.699347000  | -1.688184000 |
| H  | -5.868650000 | 5.075394000  | -2.235501000 |
| H  | -2.326248000 | -1.114358000 | -2.378583000 |
| H  | -1.914566000 | -1.869299000 | -3.917859000 |
| H  | -1.292219000 | -0.268512000 | -3.536205000 |
| H  | -2.419131000 | -2.843500000 | -1.042401000 |
| H  | -1.475500000 | -3.742726000 | 0.147270000  |
| H  | -1.792411000 | -4.437424000 | -1.436263000 |
| H  | 3.300379000  | -3.616476000 | -3.429699000 |
| H  | 3.850689000  | -3.379429000 | -1.775948000 |

|   |              |              |              |
|---|--------------|--------------|--------------|
| H | 3.846146000  | -2.028033000 | -2.917099000 |
| H | 2.512368000  | -0.697149000 | -4.167771000 |
| H | 0.885729000  | 0.004301000  | -4.272633000 |
| H | 1.245552000  | -1.521064000 | -5.065016000 |
| H | -4.620893000 | 2.404652000  | 1.733264000  |
| H | -3.001021000 | 3.070896000  | 1.650595000  |
| H | -2.901761000 | 0.740659000  | 2.020530000  |
| C | 3.108215000  | 0.233734000  | 1.580540000  |
| O | 2.929923000  | -0.509337000 | 0.329228000  |
| C | 4.235313000  | -0.687807000 | -0.310644000 |
| C | 5.223799000  | 0.110206000  | 0.526847000  |
| C | 4.579883000  | 0.086929000  | 1.913206000  |
| H | 2.835159000  | 1.276713000  | 1.389654000  |
| H | 2.437735000  | -0.202210000 | 2.317349000  |
| H | 4.454170000  | -1.756920000 | -0.299750000 |
| H | 4.154463000  | -0.337600000 | -1.341741000 |
| H | 6.220324000  | -0.339617000 | 0.507594000  |
| H | 5.303744000  | 1.137390000  | 0.156762000  |
| H | 4.765739000  | -0.867110000 | 2.418890000  |
| H | 4.931987000  | 0.892762000  | 2.562856000  |
| C | -4.496331000 | -0.077437000 | -0.877556000 |
| C | -4.126818000 | 0.009041000  | 0.472863000  |
| C | -4.731742000 | -0.884963000 | 1.365610000  |
| C | -5.664264000 | -1.830072000 | 0.942983000  |
| C | -6.006579000 | -1.890444000 | -0.405574000 |
| C | -5.427877000 | -1.014657000 | -1.321822000 |
| H | -4.062206000 | 0.602654000  | -1.605309000 |
| H | -4.472056000 | -0.841951000 | 2.421419000  |
| H | -6.122105000 | -2.512921000 | 1.651689000  |
| H | -5.709539000 | -1.062166000 | -2.369211000 |
| C | 0.180414000  | -1.803723000 | 1.963228000  |
| C | -0.372927000 | -0.521995000 | 1.704880000  |
| C | -0.188160000 | 0.453226000  | 2.722324000  |
| C | 0.435077000  | 0.148807000  | 3.921298000  |
| C | 0.957035000  | -1.135067000 | 4.143181000  |
| C | 0.836863000  | -2.110378000 | 3.162424000  |
| H | -0.031027000 | -2.624833000 | 1.276931000  |
| H | -0.596643000 | 1.450537000  | 2.589903000  |
| H | 0.516582000  | 0.900096000  | 4.701528000  |
| H | 1.212811000  | -3.112829000 | 3.342472000  |
| C | -0.987269000 | -0.263819000 | 0.402325000  |
| C | -1.791834000 | 1.014978000  | 0.215112000  |
| H | -1.584249000 | -1.130565000 | 0.096956000  |
| H | -1.211562000 | 1.891839000  | 0.540322000  |

|    |              |              |              |
|----|--------------|--------------|--------------|
| H  | -1.980587000 | 1.177342000  | -0.853658000 |
| Si | 1.660188000  | -4.883353000 | -0.318407000 |
| C  | 0.341946000  | -5.620220000 | 0.828672000  |
| H  | -0.000077000 | -4.940438000 | 1.616559000  |
| H  | -0.534865000 | -5.978890000 | 0.281523000  |
| H  | 0.790725000  | -6.488641000 | 1.326937000  |
| C  | 3.181032000  | -4.503774000 | 0.760772000  |
| H  | 4.078243000  | -4.269278000 | 0.178402000  |
| H  | 2.997451000  | -3.677536000 | 1.457035000  |
| H  | 3.415513000  | -5.391976000 | 1.360143000  |
| C  | 2.106291000  | -6.204489000 | -1.601860000 |
| H  | 2.932187000  | -5.896842000 | -2.251125000 |
| H  | 2.406814000  | -7.130523000 | -1.097423000 |
| H  | 1.245215000  | -6.435661000 | -2.238831000 |
| Cl | 1.738009000  | -1.500749000 | 5.651589000  |
| Cl | -7.164351000 | -3.071001000 | -0.953546000 |
| C  | 5.152198000  | 4.490594000  | -0.675268000 |
| C  | 5.398593000  | 3.681384000  | -1.784914000 |
| C  | 4.407034000  | 2.809360000  | -2.219335000 |
| C  | 3.167676000  | 2.721534000  | -1.561426000 |
| C  | 2.942828000  | 3.561844000  | -0.454811000 |
| C  | 3.922184000  | 4.437455000  | -0.010288000 |
| H  | 6.349862000  | 3.744518000  | -2.303032000 |
| H  | 4.595120000  | 2.190123000  | -3.093801000 |
| H  | 1.982568000  | 3.552646000  | 0.053371000  |
| H  | 3.738908000  | 5.090621000  | 0.836713000  |
| C  | 2.165009000  | 1.794499000  | -2.077691000 |
| C  | 0.950288000  | 1.510508000  | -1.554360000 |
| H  | 2.440395000  | 1.306609000  | -3.011709000 |
| H  | 0.228199000  | 0.930031000  | -2.130143000 |
| H  | 0.567899000  | 2.008536000  | -0.668545000 |
| Cl | 6.374142000  | 5.582521000  | -0.121086000 |

***p*TS3<sup>a</sup><sub>syn</sub>,  $E_{(\text{SCF Done})} = -3794.031718$  a.u. **IF** = *i* -184.66 cm<sup>-1</sup>**

|    |              |              |              |
|----|--------------|--------------|--------------|
| Sc | 1.368475000  | -0.516021000 | -0.628902000 |
| Si | -6.244478000 | 3.777922000  | -0.174975000 |
| C  | -5.001039000 | 2.337434000  | -0.414348000 |
| C  | -5.323936000 | 5.293797000  | 0.505127000  |
| C  | -7.613683000 | 3.260728000  | 1.030151000  |
| C  | -6.989000000 | 4.188952000  | -1.869025000 |
| C  | -0.826309000 | -1.490266000 | -3.306907000 |
| C  | 0.351199000  | -1.891796000 | -2.466661000 |
| C  | 0.303668000  | -2.680076000 | -1.283080000 |
| C  | 1.647738000  | -2.973025000 | -0.863760000 |

|   |               |               |               |
|---|---------------|---------------|---------------|
| C | 2. 513623000  | -2. 385931000 | -1. 852977000 |
| C | 1. 721030000  | -1. 719634000 | -2. 824809000 |
| C | -0. 968896000 | -3. 259668000 | -0. 729900000 |
| C | 3. 971979000  | -2. 685515000 | -2. 064010000 |
| C | 2. 230474000  | -1. 182740000 | -4. 130726000 |
| C | -4. 321851000 | 1. 855220000  | 0. 869519000  |
| C | -3. 242199000 | 0. 745122000  | 0. 736727000  |
| H | -4. 256066000 | 2. 681508000  | -1. 147341000 |
| H | -5. 545820000 | 1. 511463000  | -0. 890827000 |
| H | -4. 886653000 | 5. 098203000  | 1. 491250000  |
| H | -6. 008707000 | 6. 142864000  | 0. 613458000  |
| H | -4. 516930000 | 5. 605417000  | -0. 168732000 |
| H | -8. 144532000 | 2. 370660000  | 0. 672977000  |
| H | -8. 350681000 | 4. 064809000  | 1. 138676000  |
| H | -7. 217962000 | 3. 039858000  | 2. 028092000  |
| H | -6. 214435000 | 4. 486249000  | -2. 585680000 |
| H | -7. 703119000 | 5. 016679000  | -1. 790090000 |
| H | -7. 523422000 | 3. 328702000  | -2. 288458000 |
| H | -1. 711194000 | -1. 255195000 | -2. 706662000 |
| H | -1. 111360000 | -2. 309832000 | -3. 980178000 |
| H | -0. 606811000 | -0. 624677000 | -3. 940557000 |
| H | -1. 848076000 | -2. 665004000 | -0. 993892000 |
| H | -0. 965574000 | -3. 379711000 | 0. 355398000  |
| H | -1. 130451000 | -4. 259725000 | -1. 154075000 |
| H | 4. 069564000  | -3. 497726000 | -2. 796926000 |
| H | 4. 473933000  | -3. 019619000 | -1. 153958000 |
| H | 4. 529937000  | -1. 834979000 | -2. 468431000 |
| H | 3. 198193000  | -0. 678791000 | -4. 032733000 |
| H | 1. 531978000  | -0. 483369000 | -4. 601194000 |
| H | 2. 374542000  | -2. 006676000 | -4. 842723000 |
| H | -5. 084590000 | 1. 484375000  | 1. 565948000  |
| H | -3. 842136000 | 2. 706852000  | 1. 374138000  |
| H | -2. 860090000 | 0. 592080000  | 1. 755983000  |
| C | 3. 328668000  | 0. 773081000  | 1. 682039000  |
| O | 3. 227662000  | 0. 018635000  | 0. 427914000  |
| C | 4. 566114000  | -0. 104287000 | -0. 160001000 |
| C | 5. 460019000  | 0. 811808000  | 0. 656803000  |
| C | 4. 803407000  | 0. 759404000  | 2. 035379000  |
| H | 2. 969933000  | 1. 786826000  | 1. 485202000  |
| H | 2. 690576000  | 0. 277699000  | 2. 410345000  |
| H | 4. 857482000  | -1. 151038000 | -0. 068850000 |
| H | 4. 497884000  | 0. 179397000  | -1. 211546000 |
| H | 6. 496518000  | 0. 463098000  | 0. 659111000  |
| H | 5. 437792000  | 1. 829426000  | 0. 254423000  |

|    |              |              |              |
|----|--------------|--------------|--------------|
| H  | 5.068118000  | -0.164419000 | 2.561816000  |
| H  | 5.072740000  | 1.606660000  | 2.671910000  |
| C  | -4.163343000 | -0.851025000 | -1.045257000 |
| C  | -3.822673000 | -0.583350000 | 0.288916000  |
| C  | -4.085707000 | -1.581323000 | 1.236435000  |
| C  | -4.660582000 | -2.799600000 | 0.880987000  |
| C  | -4.983798000 | -3.035177000 | -0.453626000 |
| C  | -4.739970000 | -2.063393000 | -1.422122000 |
| H  | -3.996413000 | -0.100701000 | -1.813453000 |
| H  | -3.844313000 | -1.401133000 | 2.282140000  |
| H  | -4.860653000 | -3.558565000 | 1.630826000  |
| H  | -5.006970000 | -2.251095000 | -2.457514000 |
| C  | 0.214256000  | -0.957478000 | 1.893454000  |
| C  | -0.217209000 | 0.279683000  | 1.361835000  |
| C  | -0.095593000 | 1.415350000  | 2.205057000  |
| C  | 0.364246000  | 1.306546000  | 3.504870000  |
| C  | 0.766676000  | 0.057512000  | 4.007144000  |
| C  | 0.709617000  | -1.070371000 | 3.199645000  |
| H  | 0.029516000  | -1.873323000 | 1.337019000  |
| H  | -0.420432000 | 2.388449000  | 1.848348000  |
| H  | 0.407903000  | 2.180587000  | 4.147632000  |
| H  | 0.998949000  | -2.038907000 | 3.594945000  |
| C  | -0.799112000 | 0.353865000  | 0.010118000  |
| C  | -2.049855000 | 1.219766000  | -0.121666000 |
| H  | -1.025030000 | -0.657490000 | -0.360928000 |
| H  | -1.824558000 | 2.254802000  | 0.170153000  |
| H  | -2.350507000 | 1.273137000  | -1.173471000 |
| Si | 2.237583000  | -4.259409000 | 0.429499000  |
| C  | 0.851608000  | -4.892528000 | 1.561129000  |
| H  | 0.365029000  | -4.116666000 | 2.162134000  |
| H  | 0.077317000  | -5.433717000 | 1.008875000  |
| H  | 1.304942000  | -5.604343000 | 2.262304000  |
| C  | 3.593859000  | -3.550319000 | 1.558582000  |
| H  | 4.528020000  | -3.340253000 | 1.027252000  |
| H  | 3.269672000  | -2.629723000 | 2.056445000  |
| H  | 3.828813000  | -4.284747000 | 2.338536000  |
| C  | 2.911490000  | -5.757569000 | -0.515293000 |
| H  | 3.781771000  | -5.511799000 | -1.131728000 |
| H  | 3.214760000  | -6.538630000 | 0.192049000  |
| H  | 2.142970000  | -6.182018000 | -1.170985000 |
| Cl | 1.322306000  | -0.067961000 | 5.643515000  |
| Cl | -5.695845000 | -4.554579000 | -0.916413000 |
| C  | 4.488062000  | 4.382531000  | -1.026245000 |
| C  | 4.695226000  | 3.500636000  | -2.087380000 |

|    |              |             |              |
|----|--------------|-------------|--------------|
| C  | 3.736512000  | 2.533805000 | -2.370979000 |
| C  | 2.553210000  | 2.417563000 | -1.617669000 |
| C  | 2.377527000  | 3.321097000 | -0.553737000 |
| C  | 3.325970000  | 4.296162000 | -0.259675000 |
| H  | 5.590623000  | 3.584594000 | -2.695339000 |
| H  | 3.891243000  | 1.878448000 | -3.225902000 |
| H  | 1.474669000  | 3.282431000 | 0.051210000  |
| H  | 3.163255000  | 4.994881000 | 0.555218000  |
| C  | 1.538537000  | 1.429693000 | -2.021743000 |
| C  | 0.189740000  | 1.513699000 | -1.652527000 |
| H  | 1.758304000  | 0.904176000 | -2.946433000 |
| H  | -0.549105000 | 1.079738000 | -2.318868000 |
| H  | -0.154430000 | 2.392461000 | -1.117015000 |
| Cl | 5.676075000  | 5.596966000 | -0.662855000 |

***pP3***<sup>a</sup><sub>syn</sub>,  $E_{(\text{SCF Done})} = -3794.072635$  a.u.

|    |              |              |              |
|----|--------------|--------------|--------------|
| Sc | -1.898689000 | 0.305619000  | -0.466607000 |
| Si | 7.575375000  | -2.546530000 | 0.051279000  |
| C  | 5.899225000  | -1.687313000 | -0.299175000 |
| C  | 7.270294000  | -4.208064000 | 0.917980000  |
| C  | 8.653645000  | -1.435875000 | 1.146997000  |
| C  | 8.432390000  | -2.842212000 | -1.614131000 |
| C  | 0.038577000  | 1.428952000  | -3.297819000 |
| C  | -1.088980000 | 1.731131000  | -2.355920000 |
| C  | -1.001192000 | 2.521434000  | -1.176498000 |
| C  | -2.325235000 | 2.724709000  | -0.646561000 |
| C  | -3.224343000 | 2.058696000  | -1.550867000 |
| C  | -2.466603000 | 1.443250000  | -2.586658000 |
| C  | 0.270113000  | 3.192863000  | -0.734505000 |
| C  | -4.723773000 | 2.157314000  | -1.565135000 |
| C  | -3.027054000 | 0.781770000  | -3.811495000 |
| C  | 5.074669000  | -1.343777000 | 0.943728000  |
| C  | 3.709462000  | -0.637932000 | 0.705509000  |
| H  | 5.335382000  | -2.350590000 | -0.971150000 |
| H  | 6.113204000  | -0.775126000 | -0.873023000 |
| H  | 6.783475000  | -4.077781000 | 1.891630000  |
| H  | 8.218072000  | -4.730427000 | 1.092142000  |
| H  | 6.637917000  | -4.864628000 | 0.308643000  |
| H  | 8.812084000  | -0.454192000 | 0.685588000  |
| H  | 9.638298000  | -1.891263000 | 1.304250000  |
| H  | 8.203851000  | -1.276392000 | 2.133712000  |
| H  | 7.825792000  | -3.480444000 | -2.267283000 |
| H  | 9.400612000  | -3.336558000 | -1.473783000 |
| H  | 8.614975000  | -1.898406000 | -2.140901000 |

|   |               |               |               |
|---|---------------|---------------|---------------|
| H | 1. 000931000  | 1. 341399000  | -2. 784813000 |
| H | 0. 141967000  | 2. 237782000  | -4. 033846000 |
| H | -0. 124616000 | 0. 505113000  | -3. 861327000 |
| H | 1. 160282000  | 2. 593752000  | -0. 951875000 |
| H | 0. 278987000  | 3. 438405000  | 0. 328945000  |
| H | 0. 396926000  | 4. 139041000  | -1. 277212000 |
| H | -5. 031662000 | 3. 034438000  | -2. 149154000 |
| H | -5. 152606000 | 2. 271082000  | -0. 566035000 |
| H | -5. 192116000 | 1. 291334000  | -2. 043740000 |
| H | -3. 940556000 | 0. 214047000  | -3. 607697000 |
| H | -2. 306929000 | 0. 103782000  | -4. 278794000 |
| H | -3. 284017000 | 1. 540296000  | -4. 563276000 |
| H | 5. 665206000  | -0. 697627000 | 1. 606241000  |
| H | 4. 869681000  | -2. 258885000 | 1. 517881000  |
| H | 3. 274327000  | -0. 499736000 | 1. 706742000  |
| C | -3. 709680000 | -0. 584124000 | 2. 127836000  |
| O | -3. 635567000 | -0. 414131000 | 0. 674414000  |
| C | -4. 854313000 | -0. 968119000 | 0. 059542000  |
| C | -5. 569303000 | -1. 705194000 | 1. 178988000  |
| C | -5. 164917000 | -0. 902996000 | 2. 415925000  |
| H | -3. 046910000 | -1. 411175000 | 2. 399786000  |
| H | -3. 359099000 | 0. 338788000  | 2. 589802000  |
| H | -5. 438144000 | -0. 122632000 | -0. 309803000 |
| H | -4. 545897000 | -1. 608347000 | -0. 768278000 |
| H | -6. 650373000 | -1. 728841000 | 1. 016979000  |
| H | -5. 210118000 | -2. 736374000 | 1. 248293000  |
| H | -5. 752618000 | 0. 018149000  | 2. 497209000  |
| H | -5. 277407000 | -1. 463078000 | 3. 348204000  |
| C | 4. 026785000  | 0. 981206000  | -1. 259256000 |
| C | 3. 885999000  | 0. 750337000  | 0. 116745000  |
| C | 3. 967984000  | 1. 859073000  | 0. 969870000  |
| C | 4. 181320000  | 3. 147432000  | 0. 484529000  |
| C | 4. 313783000  | 3. 342153000  | -0. 888726000 |
| C | 4. 239182000  | 2. 262788000  | -1. 766509000 |
| H | 3. 983885000  | 0. 151165000  | -1. 959362000 |
| H | 3. 874415000  | 1. 712877000  | 2. 044437000  |
| H | 4. 249012000  | 3. 992255000  | 1. 162840000  |
| H | 4. 356945000  | 2. 422513000  | -2. 833893000 |
| C | 0. 068777000  | 0. 470362000  | 1. 422688000  |
| C | 0. 622750000  | -0. 778924000 | 1. 094522000  |
| C | 0. 521903000  | -1. 798010000 | 2. 056432000  |
| C | -0. 071522000 | -1. 574432000 | 3. 294742000  |
| C | -0. 598790000 | -0. 315355000 | 3. 599837000  |
| C | -0. 535718000 | 0. 713221000  | 2. 666615000  |

|    |              |              |              |
|----|--------------|--------------|--------------|
| H  | 0.248650000  | 1.317772000  | 0.760954000  |
| H  | 0.944221000  | -2.778175000 | 1.850940000  |
| H  | -0.115558000 | -2.368377000 | 4.034416000  |
| H  | -0.906299000 | 1.702661000  | 2.916992000  |
| C  | 1.307850000  | -1.000568000 | -0.237475000 |
| C  | 2.745855000  | -1.532726000 | -0.088882000 |
| H  | 1.367886000  | -0.025249000 | -0.741095000 |
| H  | 2.721755000  | -2.523566000 | 0.386738000  |
| H  | 3.136199000  | -1.708676000 | -1.098391000 |
| Si | -2.906177000 | 4.000452000  | 0.662267000  |
| C  | -1.486577000 | 4.850934000  | 1.588424000  |
| H  | -0.859013000 | 4.165297000  | 2.168896000  |
| H  | -0.839286000 | 5.433683000  | 0.926106000  |
| H  | -1.937606000 | 5.552641000  | 2.301214000  |
| C  | -4.009770000 | 3.212844000  | 1.996814000  |
| H  | -4.828995000 | 2.608430000  | 1.594729000  |
| H  | -3.423389000 | 2.588477000  | 2.680961000  |
| H  | -4.458502000 | 4.010475000  | 2.601139000  |
| C  | -3.877829000 | 5.348070000  | -0.247694000 |
| H  | -4.812700000 | 4.978516000  | -0.680080000 |
| H  | -4.132518000 | 6.153040000  | 0.451900000  |
| H  | -3.279829000 | 5.784434000  | -1.055483000 |
| Cl | -1.329470000 | -0.036735000 | 5.149183000  |
| Cl | 4.571353000  | 4.947773000  | -1.513960000 |
| C  | -4.047491000 | -4.442239000 | -1.360971000 |
| C  | -3.898411000 | -3.654592000 | -2.501241000 |
| C  | -2.892191000 | -2.691547000 | -2.543601000 |
| C  | -2.009766000 | -2.474029000 | -1.464031000 |
| C  | -2.199873000 | -3.290900000 | -0.327651000 |
| C  | -3.190979000 | -4.265381000 | -0.273041000 |
| H  | -4.546451000 | -3.812144000 | -3.358121000 |
| H  | -2.759353000 | -2.121686000 | -3.459486000 |
| H  | -1.539221000 | -3.178037000 | 0.529529000  |
| H  | -3.295490000 | -4.897655000 | 0.603941000  |
| C  | -0.938266000 | -1.436852000 | -1.531175000 |
| C  | 0.463599000  | -1.942782000 | -1.118289000 |
| H  | -0.884795000 | -1.085559000 | -2.567795000 |
| H  | 1.048660000  | -2.163183000 | -2.022324000 |
| H  | 0.371682000  | -2.903682000 | -0.595099000 |
| Cl | -5.291559000 | -5.655777000 | -1.295656000 |

$pP3^a_{iso}, E_{(SCF Done)} = -3794.043522$  a.u.

|    |              |              |              |
|----|--------------|--------------|--------------|
| Sc | 1.517988000  | -0.114324000 | -0.013601000 |
| Si | -6.554863000 | 1.048942000  | 1.457360000  |



|   |              |              |              |
|---|--------------|--------------|--------------|
| C | -5.035186000 | 0.228741000  | 0.628321000  |
| C | -5.999615000 | 1.997088000  | 3.007380000  |
| C | -7.827503000 | -0.271207000 | 1.939662000  |
| C | -7.320478000 | 2.255667000  | 0.210113000  |
| C | -0.483637000 | 0.091715000  | -2.959526000 |
| C | 0.909122000  | 0.037853000  | -2.409515000 |
| C | 1.701434000  | -1.129170000 | -2.252736000 |
| C | 3.033598000  | -0.746376000 | -1.850627000 |
| C | 3.028809000  | 0.689703000  | -1.764664000 |
| C | 1.729758000  | 1.163955000  | -2.106138000 |
| C | 1.229106000  | -2.507664000 | -2.623503000 |
| C | 4.186698000  | 1.608088000  | -1.485423000 |
| C | 1.343897000  | 2.595529000  | -2.325976000 |
| C | -4.297321000 | -0.793059000 | 1.497891000  |
| C | -3.017262000 | -1.443444000 | 0.908460000  |
| H | -4.360180000 | 1.042236000  | 0.321618000  |
| H | -5.386338000 | -0.245664000 | -0.297938000 |
| H | -5.554889000 | 1.328318000  | 3.753717000  |
| H | -6.854557000 | 2.493702000  | 3.480626000  |
| H | -5.261799000 | 2.771126000  | 2.764000000  |
| H | -8.139294000 | -0.862015000 | 1.070580000  |
| H | -8.724803000 | 0.195942000  | 2.362069000  |
| H | -7.431317000 | -0.962166000 | 2.692291000  |
| H | -6.608634000 | 3.035562000  | -0.085188000 |
| H | -8.198851000 | 2.753226000  | 0.637107000  |
| H | -7.643943000 | 1.733856000  | -0.698004000 |
| H | -1.063463000 | -0.801805000 | -2.712002000 |
| H | -0.456500000 | 0.165434000  | -4.055454000 |
| H | -1.038394000 | 0.962788000  | -2.595783000 |
| H | 0.208909000  | -2.711336000 | -2.278968000 |
| H | 1.877298000  | -3.294814000 | -2.229633000 |
| H | 1.214711000  | -2.621264000 | -3.715238000 |
| H | 4.633221000  | 1.964436000  | -2.423401000 |
| H | 4.984543000  | 1.126368000  | -0.917808000 |
| H | 3.873215000  | 2.498930000  | -0.929738000 |
| H | 1.924831000  | 3.288564000  | -1.712700000 |
| H | 0.285501000  | 2.779099000  | -2.120519000 |
| H | 1.516601000  | 2.870740000  | -3.375465000 |
| H | -4.986849000 | -1.605132000 | 1.763481000  |
| H | -4.007768000 | -0.322632000 | 2.449500000  |
| H | -2.637174000 | -2.105167000 | 1.700564000  |
| C | 2.850343000  | 0.802133000  | 2.936005000  |
| O | 3.031219000  | 0.201052000  | 1.611725000  |
| C | 4.315923000  | -0.497389000 | 1.583650000  |

|    |               |               |               |
|----|---------------|---------------|---------------|
| C  | 5. 124480000  | 0. 129594000  | 2. 701526000  |
| C  | 4. 049092000  | 0. 360517000  | 3. 764660000  |
| H  | 2. 832693000  | 1. 885613000  | 2. 794887000  |
| H  | 1. 895356000  | 0. 457400000  | 3. 337733000  |
| H  | 4. 121766000  | -1. 557758000 | 1. 768643000  |
| H  | 4. 731347000  | -0. 367024000 | 0. 585488000  |
| H  | 5. 927565000  | -0. 528747000 | 3. 043602000  |
| H  | 5. 569389000  | 1. 076936000  | 2. 375980000  |
| H  | 3. 829458000  | -0. 572105000 | 4. 294532000  |
| H  | 4. 328550000  | 1. 116101000  | 4. 503889000  |
| C  | -3. 555458000 | -1. 824465000 | -1. 567392000 |
| C  | -3. 299258000 | -2. 335099000 | -0. 286576000 |
| C  | -3. 333014000 | -3. 726315000 | -0. 127793000 |
| C  | -3. 607398000 | -4. 582343000 | -1. 192346000 |
| C  | -3. 855623000 | -4. 041902000 | -2. 451583000 |
| C  | -3. 833371000 | -2. 662473000 | -2. 645983000 |
| H  | -3. 547183000 | -0. 751486000 | -1. 737548000 |
| H  | -3. 143546000 | -4. 156125000 | 0. 853801000  |
| H  | -3. 629152000 | -5. 657931000 | -1. 047825000 |
| C  | 1. 231439000  | -2. 606762000 | 1. 065716000  |
| C  | 0. 161253000  | -1. 735407000 | 1. 409286000  |
| C  | -0. 026881000 | -1. 493659000 | 2. 799480000  |
| C  | 0. 756974000  | -2. 111845000 | 3. 760852000  |
| C  | 1. 794668000  | -2. 974847000 | 3. 380006000  |
| C  | 2. 028211000  | -3. 228186000 | 2. 035493000  |
| H  | 1. 349601000  | -2. 916724000 | 0. 027618000  |
| H  | -0. 844768000 | -0. 857014000 | 3. 125651000  |
| H  | 2. 799209000  | -3. 933048000 | 1. 739387000  |
| C  | -0. 543197000 | -1. 026591000 | 0. 350491000  |
| C  | -1. 900570000 | -0. 405536000 | 0. 638575000  |
| H  | -0. 584698000 | -1. 639122000 | -0. 556969000 |
| H  | -1. 854837000 | 0. 265323000  | 1. 508774000  |
| H  | -2. 189887000 | 0. 233032000  | -0. 205728000 |
| Si | 4. 542652000  | -1. 911924000 | -2. 087891000 |
| C  | 4. 529159000  | -3. 428084000 | -0. 942332000 |
| H  | 4. 664935000  | -3. 154005000 | 0. 109207000  |
| H  | 3. 617071000  | -4. 028188000 | -1. 026260000 |
| H  | 5. 367964000  | -4. 079176000 | -1. 217459000 |
| C  | 6. 213735000  | -1. 042239000 | -1. 850348000 |
| H  | 6. 328539000  | -0. 177486000 | -2. 511289000 |
| H  | 6. 429404000  | -0. 723861000 | -0. 824927000 |
| H  | 6. 990907000  | -1. 765997000 | -2. 126419000 |
| C  | 4. 495682000  | -2. 490420000 | -3. 892015000 |
| H  | 4. 475542000  | -1. 633858000 | -4. 575015000 |

|    |              |              |              |
|----|--------------|--------------|--------------|
| H  | 5.396801000  | -3.074237000 | -4.114485000 |
| H  | 3.629589000  | -3.120521000 | -4.114946000 |
| C  | 0.113646000  | 6.977005000  | -0.825011000 |
| C  | 1.298705000  | 6.796861000  | -0.110625000 |
| C  | 1.515413000  | 5.591506000  | 0.544445000  |
| C  | 0.575778000  | 4.547416000  | 0.484781000  |
| C  | -0.617647000 | 4.764814000  | -0.228342000 |
| C  | -0.851481000 | 5.966136000  | -0.879747000 |
| H  | 2.031821000  | 7.595292000  | -0.064304000 |
| H  | 2.434353000  | 5.455626000  | 1.110547000  |
| H  | -1.386668000 | 3.997846000  | -0.249985000 |
| C  | 0.855869000  | 3.305734000  | 1.194097000  |
| C  | 0.220598000  | 2.116291000  | 1.075874000  |
| H  | 1.660467000  | 3.383771000  | 1.925303000  |
| H  | 0.373543000  | 1.348532000  | 1.835816000  |
| H  | -0.626877000 | 1.972641000  | 0.411434000  |
| H  | -1.778110000 | 6.133791000  | -1.418876000 |
| H  | 0.560034000  | -1.945550000 | 4.816305000  |
| H  | -4.037024000 | -2.250454000 | -3.629575000 |
| Cl | -0.176443000 | 8.476485000  | -1.638304000 |
| Cl | 2.770731000  | -3.742001000 | 4.598638000  |
| Cl | -4.192800000 | -5.097241000 | -3.796030000 |

***p*TS3<sup>a</sup><sub>iso</sub>,  $E_{(\text{SCF Done})} = -3794.025882$  a.u.  $\text{IF} = i242.26$  cm<sup>-1</sup>**

|    |              |              |              |
|----|--------------|--------------|--------------|
| Sc | -1.597844000 | 0.407873000  | -0.271410000 |
| Si | 7.009731000  | -0.068319000 | -1.448541000 |
| C  | 5.244027000  | -0.129091000 | -0.702908000 |
| C  | 6.903029000  | 0.123168000  | -3.334414000 |
| C  | 7.938428000  | -1.663105000 | -1.013947000 |
| C  | 7.902271000  | 1.428563000  | -0.702355000 |
| C  | 0.112028000  | 1.560699000  | 2.638370000  |
| C  | -1.195990000 | 1.073520000  | 2.087656000  |
| C  | -1.657748000 | -0.269023000 | 2.104119000  |
| C  | -3.022263000 | -0.304585000 | 1.636840000  |
| C  | -3.371255000 | 1.057638000  | 1.328259000  |
| C  | -2.263514000 | 1.900219000  | 1.626813000  |
| C  | -0.881379000 | -1.406580000 | 2.710405000  |
| C  | -4.708613000 | 1.609321000  | 0.917349000  |
| C  | -2.337348000 | 3.389346000  | 1.765783000  |
| C  | 4.383289000  | -1.297380000 | -1.189322000 |
| C  | 2.940405000  | -1.411185000 | -0.622040000 |
| H  | 4.761782000  | 0.833486000  | -0.929065000 |
| H  | 5.360249000  | -0.170363000 | 0.388544000  |
| H  | 6.406395000  | -0.733465000 | -3.804696000 |

|   |               |               |               |
|---|---------------|---------------|---------------|
| H | 7. 906826000  | 0. 197799000  | -3. 768467000 |
| H | 6. 354227000  | 1. 030030000  | -3. 615070000 |
| H | 7. 985596000  | -1. 813943000 | 0. 070796000  |
| H | 8. 967866000  | -1. 621817000 | -1. 388177000 |
| H | 7. 463056000  | -2. 545870000 | -1. 456921000 |
| H | 7. 380263000  | 2. 364015000  | -0. 935461000 |
| H | 8. 921351000  | 1. 510821000  | -1. 097474000 |
| H | 7. 975794000  | 1. 346286000  | 0. 388255000  |
| H | 0. 904965000  | 0. 811706000  | 2. 547930000  |
| H | 0. 009966000  | 1. 786407000  | 3. 708903000  |
| H | 0. 446198000  | 2. 479421000  | 2. 148129000  |
| H | 0. 164312000  | -1. 439546000 | 2. 384579000  |
| H | -1. 328339000 | -2. 379994000 | 2. 492165000  |
| H | -0. 858843000 | -1. 304426000 | 3. 803021000  |
| H | -5. 248054000 | 1. 999368000  | 1. 791108000  |
| H | -5. 356152000 | 0. 864323000  | 0. 453061000  |
| H | -4. 603240000 | 2. 446347000  | 0. 218257000  |
| H | -2. 958686000 | 3. 858678000  | 0. 999514000  |
| H | -1. 356103000 | 3. 866057000  | 1. 733655000  |
| H | -2. 787878000 | 3. 630663000  | 2. 738935000  |
| H | 4. 891799000  | -2. 244130000 | -0. 965355000 |
| H | 4. 293187000  | -1. 255991000 | -2. 284646000 |
| H | 2. 491803000  | -2. 268773000 | -1. 143369000 |
| C | -3. 052328000 | 0. 437227000  | -3. 277540000 |
| O | -3. 103476000 | 0. 004709000  | -1. 875403000 |
| C | -4. 224328000 | -0. 924566000 | -1. 712832000 |
| C | -5. 140498000 | -0. 636188000 | -2. 884709000 |
| C | -4. 131517000 | -0. 356981000 | -3. 999236000 |
| H | -3. 258832000 | 1. 511144000  | -3. 296235000 |
| H | -2. 046753000 | 0. 245382000  | -3. 656550000 |
| H | -3. 822926000 | -1. 941040000 | -1. 751790000 |
| H | -4. 655719000 | -0. 737033000 | -0. 731772000 |
| H | -5. 798656000 | -1. 480686000 | -3. 106161000 |
| H | -5. 762014000 | 0. 244333000  | -2. 686008000 |
| H | -3. 724795000 | -1. 295213000 | -4. 391181000 |
| H | -4. 554219000 | 0. 207606000  | -4. 834582000 |
| C | 3. 164112000  | -0. 792637000 | 1. 855311000  |
| C | 2. 921395000  | -1. 747755000 | 0. 857174000  |
| C | 2. 710070000  | -3. 071378000 | 1. 265946000  |
| C | 2. 738595000  | -3. 439395000 | 2. 609414000  |
| C | 2. 983982000  | -2. 466340000 | 3. 576044000  |
| C | 3. 199358000  | -1. 140532000 | 3. 205249000  |
| H | 3. 348403000  | 0. 243976000  | 1. 586183000  |
| H | 2. 529573000  | -3. 838984000 | 0. 516080000  |

|    |              |              |              |
|----|--------------|--------------|--------------|
| H  | 2.578488000  | -4.471463000 | 2.905196000  |
| C  | -0.951961000 | -2.358008000 | -0.811500000 |
| C  | -0.055921000 | -1.488240000 | -1.467700000 |
| C  | 0.159323000  | -1.708115000 | -2.852793000 |
| C  | -0.482911000 | -2.727491000 | -3.534553000 |
| C  | -1.378656000 | -3.564908000 | -2.854270000 |
| C  | -1.608790000 | -3.387724000 | -1.497408000 |
| H  | -1.055643000 | -2.312950000 | 0.269963000  |
| H  | 0.875128000  | -1.094614000 | -3.392874000 |
| H  | -2.258740000 | -4.071998000 | -0.962857000 |
| C  | 0.590560000  | -0.368513000 | -0.760317000 |
| C  | 2.086982000  | -0.179357000 | -0.991047000 |
| H  | 0.420825000  | -0.444229000 | 0.333849000  |
| H  | 2.277494000  | 0.047713000  | -2.049259000 |
| H  | 2.427837000  | 0.699985000  | -0.431596000 |
| Si | -4.234400000 | -1.705245000 | 2.150218000  |
| C  | -3.862667000 | -3.403467000 | 1.384686000  |
| H  | -4.084168000 | -3.421299000 | 0.312498000  |
| H  | -2.832494000 | -3.742674000 | 1.534661000  |
| H  | -4.517069000 | -4.143166000 | 1.861728000  |
| C  | -6.054203000 | -1.328759000 | 1.761299000  |
| H  | -6.400385000 | -0.404551000 | 2.233729000  |
| H  | -6.301610000 | -1.285957000 | 0.695204000  |
| H  | -6.643084000 | -2.150185000 | 2.188825000  |
| C  | -4.104718000 | -1.831494000 | 4.037093000  |
| H  | -4.295528000 | -0.860139000 | 4.506832000  |
| H  | -4.855530000 | -2.537331000 | 4.411839000  |
| H  | -3.123928000 | -2.181709000 | 4.372580000  |
| C  | 0.051834000  | 6.315366000  | -0.001973000 |
| C  | -1.157321000 | 6.091802000  | -0.658442000 |
| C  | -1.472424000 | 4.808680000  | -1.091690000 |
| C  | -0.602581000 | 3.725415000  | -0.886551000 |
| C  | 0.612660000  | 3.984902000  | -0.232107000 |
| C  | 0.942024000  | 5.262876000  | 0.209186000  |
| H  | -1.840369000 | 6.916909000  | -0.833596000 |
| H  | -2.412062000 | 4.649786000  | -1.617431000 |
| H  | 1.321881000  | 3.179554000  | -0.056990000 |
| C  | -0.953392000 | 2.403530000  | -1.436355000 |
| C  | 0.028555000  | 1.493540000  | -1.859310000 |
| H  | -1.909309000 | 2.384707000  | -1.964723000 |
| H  | -0.170680000 | 0.860948000  | -2.722441000 |
| H  | 1.065029000  | 1.799568000  | -1.774432000 |
| H  | 1.885750000  | 5.445619000  | 0.713520000  |
| H  | -0.283925000 | -2.895718000 | -4.588710000 |

|    |              |              |              |
|----|--------------|--------------|--------------|
| H  | 3.401250000  | -0.391266000 | 3.964445000  |
| Cl | 0.456483000  | 7.912975000  | 0.548893000  |
| Cl | -2.172375000 | -4.848033000 | -3.711891000 |
| Cl | 3.020170000  | -2.908078000 | 5.259070000  |

**pP3<sup>a</sup>**,  $E_{(\text{SCF Done})} = -3794.074747$  a.u.

|    |              |              |              |
|----|--------------|--------------|--------------|
| Sc | 1.929418000  | -0.049731000 | 0.075914000  |
| Si | -7.623035000 | 1.784183000  | 0.905251000  |
| C  | -5.852537000 | 1.349445000  | 0.314400000  |
| C  | -7.534569000 | 2.669082000  | 2.582544000  |
| C  | -8.649865000 | 0.197315000  | 1.064509000  |
| C  | -8.404079000 | 2.931887000  | -0.385829000 |
| C  | 0.575903000  | 0.709800000  | -3.126356000 |
| C  | 1.580489000  | -0.099781000 | -2.363347000 |
| C  | 1.386038000  | -1.422524000 | -1.871416000 |
| C  | 2.636007000  | -1.921702000 | -1.352547000 |
| C  | 3.589059000  | -0.858929000 | -1.520721000 |
| C  | 2.943930000  | 0.248926000  | -2.144753000 |
| C  | 0.116755000  | -2.206139000 | -2.067576000 |
| C  | 5.066905000  | -0.878794000 | -1.242176000 |
| C  | 3.638130000  | 1.486052000  | -2.631479000 |
| C  | -5.084078000 | 0.402688000  | 1.239667000  |
| C  | -3.649493000 | -0.001448000 | 0.797896000  |
| H  | -5.310815000 | 2.298184000  | 0.188283000  |
| H  | -5.942874000 | 0.908641000  | -0.688109000 |
| H  | -7.101503000 | 2.028198000  | 3.359442000  |
| H  | -8.536827000 | 2.959891000  | 2.917831000  |
| H  | -6.929094000 | 3.581015000  | 2.519929000  |
| H  | -8.674802000 | -0.354935000 | 0.117878000  |
| H  | -9.684587000 | 0.433825000  | 1.338327000  |
| H  | -8.250551000 | -0.471836000 | 1.835243000  |
| H  | -7.822895000 | 3.853603000  | -0.506104000 |
| H  | -9.420489000 | 3.216704000  | -0.090541000 |
| H  | -8.467484000 | 2.443986000  | -1.365393000 |
| H  | -0.453155000 | 0.452517000  | -2.857552000 |
| H  | 0.679836000  | 0.520638000  | -4.203468000 |
| H  | 0.712726000  | 1.783015000  | -2.971770000 |
| H  | -0.785532000 | -1.607960000 | -1.898807000 |
| H  | 0.061240000  | -3.082867000 | -1.416641000 |
| H  | 0.051305000  | -2.570495000 | -3.100800000 |
| H  | 5.620284000  | -1.207588000 | -2.131996000 |
| H  | 5.343223000  | -1.554435000 | -0.430457000 |
| H  | 5.443408000  | 0.119904000  | -0.995904000 |
| H  | 4.293759000  | 1.933688000  | -1.877350000 |

|    |              |              |              |
|----|--------------|--------------|--------------|
| H  | 2.930059000  | 2.257761000  | -2.936754000 |
| H  | 4.263205000  | 1.242689000  | -3.501020000 |
| H  | -5.656495000 | -0.524940000 | 1.371101000  |
| H  | -5.000158000 | 0.850010000  | 2.240545000  |
| H  | -3.271727000 | -0.651631000 | 1.601430000  |
| C  | 3.846079000  | 0.696949000  | 2.667900000  |
| O  | 3.292971000  | -0.332889000 | 1.777024000  |
| C  | 3.827274000  | -1.640932000 | 2.170060000  |
| C  | 5.044443000  | -1.326922000 | 3.017524000  |
| C  | 4.593813000  | -0.062771000 | 3.752146000  |
| H  | 4.518922000  | 1.314631000  | 2.066986000  |
| H  | 3.014495000  | 1.300886000  | 3.036993000  |
| H  | 3.053851000  | -2.154155000 | 2.748186000  |
| H  | 4.030931000  | -2.193338000 | 1.253277000  |
| H  | 5.291241000  | -2.149190000 | 3.694384000  |
| H  | 5.917328000  | -1.123951000 | 2.386913000  |
| H  | 3.924897000  | -0.317417000 | 4.581002000  |
| H  | 5.426108000  | 0.523163000  | 4.151148000  |
| C  | -3.678714000 | -0.287206000 | -1.752614000 |
| C  | -3.663920000 | -0.843400000 | -0.465395000 |
| C  | -3.720430000 | -2.240128000 | -0.364006000 |
| C  | -3.791206000 | -3.057744000 | -1.489665000 |
| C  | -3.801228000 | -2.472572000 | -2.754397000 |
| C  | -3.746330000 | -1.087404000 | -2.892866000 |
| H  | -3.651756000 | 0.791490000  | -1.882127000 |
| H  | -3.724480000 | -2.702901000 | 0.621287000  |
| H  | -3.843885000 | -4.137449000 | -1.389568000 |
| C  | -0.200142000 | -1.237805000 | 1.454475000  |
| C  | -0.645711000 | 0.079962000  | 1.655687000  |
| C  | -0.542037000 | 0.611538000  | 2.953521000  |
| C  | -0.035833000 | -0.140343000 | 4.006869000  |
| C  | 0.389940000  | -1.453714000 | 3.780036000  |
| C  | 0.308129000  | -2.011355000 | 2.509933000  |
| H  | -0.368013000 | -1.716111000 | 0.488425000  |
| H  | -0.880248000 | 1.626304000  | 3.147576000  |
| H  | 0.597424000  | -3.043735000 | 2.344054000  |
| C  | -1.223232000 | 0.886190000  | 0.511621000  |
| C  | -2.714181000 | 1.214667000  | 0.726528000  |
| H  | -1.154894000 | 0.256380000  | -0.388363000 |
| H  | -2.821380000 | 1.790214000  | 1.656674000  |
| H  | -3.025503000 | 1.894314000  | -0.076121000 |
| Si | 2.990877000  | -3.794219000 | -1.127433000 |
| C  | 1.975207000  | -4.598817000 | 0.264863000  |
| H  | 2.296222000  | -4.257860000 | 1.255592000  |

|    |              |              |              |
|----|--------------|--------------|--------------|
| H  | 0.897069000  | -4.430960000 | 0.170654000  |
| H  | 2.135042000  | -5.683341000 | 0.232392000  |
| C  | 4.816052000  | -4.173841000 | -0.769419000 |
| H  | 5.479504000  | -3.792740000 | -1.551780000 |
| H  | 5.181296000  | -3.811879000 | 0.197768000  |
| H  | 4.919953000  | -5.266087000 | -0.759929000 |
| C  | 2.572781000  | -4.633389000 | -2.773182000 |
| H  | 3.122076000  | -4.166792000 | -3.598443000 |
| H  | 2.865637000  | -5.689323000 | -2.731419000 |
| H  | 1.505869000  | -4.594264000 | -3.012229000 |
| C  | 3.447501000  | 5.318747000  | -1.230381000 |
| C  | 3.894807000  | 4.583731000  | -0.135137000 |
| C  | 3.114684000  | 3.538443000  | 0.349332000  |
| C  | 1.885547000  | 3.172508000  | -0.233351000 |
| C  | 1.456378000  | 3.961615000  | -1.318452000 |
| C  | 2.219270000  | 5.015342000  | -1.814127000 |
| H  | 4.832888000  | 4.843384000  | 0.346035000  |
| H  | 3.457991000  | 3.014606000  | 1.237866000  |
| H  | 0.498393000  | 3.768253000  | -1.791322000 |
| C  | 1.112292000  | 2.010422000  | 0.293759000  |
| C  | -0.412682000 | 2.171642000  | 0.243973000  |
| H  | 1.393613000  | 1.906299000  | 1.370498000  |
| H  | -0.734633000 | 2.957825000  | 0.947115000  |
| H  | -0.720158000 | 2.525159000  | -0.745640000 |
| H  | 1.856813000  | 5.607264000  | -2.649054000 |
| H  | 0.019580000  | 0.278965000  | 5.007116000  |
| H  | -3.766626000 | -0.640220000 | -3.881937000 |
| Cl | 4.406275000  | 6.632135000  | -1.847422000 |
| Cl | 1.016901000  | -2.394932000 | 5.099595000  |
| Cl | -3.880225000 | -3.480308000 | -4.172732000 |

$pC3^a_{syn}, E_{(SCF Done)} = -3794.039282 \text{ a.u.}$

|    |              |              |              |
|----|--------------|--------------|--------------|
| Sc | -0.925813000 | -1.327870000 | 0.586601000  |
| Si | 3.765987000  | 5.360876000  | 1.127889000  |
| C  | 3.396553000  | 3.535560000  | 0.682591000  |
| C  | 2.138341000  | 6.295513000  | 1.423901000  |
| C  | 4.727789000  | 6.184628000  | -0.283770000 |
| C  | 4.806953000  | 5.379672000  | 2.713365000  |
| C  | 0.132688000  | -2.172882000 | 3.939492000  |
| C  | -0.905940000 | -1.523222000 | 3.068526000  |
| C  | -2.114414000 | -2.142707000 | 2.632975000  |
| C  | -2.920631000 | -1.151361000 | 2.014298000  |
| C  | -2.230576000 | 0.112490000  | 2.071187000  |
| C  | -0.981038000 | -0.137552000 | 2.738046000  |



|   |               |               |               |
|---|---------------|---------------|---------------|
| C | -2. 534811000 | -3. 548290000 | 2. 946181000  |
| C | -4. 311001000 | -1. 416280000 | 1. 508291000  |
| C | 2. 507113000  | 3. 340248000  | -0. 548428000 |
| C | 2. 182222000  | 1. 879040000  | -0. 964768000 |
| H | 2. 942242000  | 3. 068285000  | 1. 568953000  |
| H | 4. 364601000  | 3. 037806000  | 0. 534275000  |
| H | 1. 516012000  | 6. 321443000  | 0. 521916000  |
| H | 2. 338777000  | 7. 333316000  | 1. 714686000  |
| H | 1. 551666000  | 5. 835236000  | 2. 228060000  |
| H | 5. 670947000  | 5. 661220000  | -0. 478936000 |
| H | 4. 970352000  | 7. 223456000  | -0. 031495000 |
| H | 4. 151685000  | 6. 197626000  | -1. 216098000 |
| H | 4. 274118000  | 4. 910271000  | 3. 548765000  |
| H | 5. 049701000  | 6. 406743000  | 3. 009316000  |
| H | 5. 751954000  | 4. 842269000  | 2. 572826000  |
| H | 0. 429307000  | -3. 168398000 | 3. 590142000  |
| H | -0. 257279000 | -2. 295887000 | 4. 958637000  |
| H | 1. 039251000  | -1. 567429000 | 4. 019728000  |
| H | -1. 681256000 | -4. 201272000 | 3. 151815000  |
| H | -3. 128511000 | -4. 004424000 | 2. 146991000  |
| H | -3. 162777000 | -3. 560364000 | 3. 847193000  |
| H | -4. 423541000 | -2. 447232000 | 1. 153251000  |
| H | -4. 597058000 | -0. 744966000 | 0. 697551000  |
| H | -5. 047074000 | -1. 284448000 | 2. 312574000  |
| H | 2. 970903000  | 3. 831060000  | -1. 414300000 |
| H | 1. 546043000  | 3. 851403000  | -0. 390623000 |
| H | 1. 506816000  | 1. 971707000  | -1. 830229000 |
| C | -0. 250827000 | -4. 478994000 | 0. 450978000  |
| O | -1. 132553000 | -3. 449053000 | -0. 113436000 |
| C | -2. 171013000 | -4. 087031000 | -0. 914791000 |
| C | -1. 753148000 | -5. 544838000 | -1. 041595000 |
| C | -0. 994514000 | -5. 788755000 | 0. 263637000  |
| H | 0. 684549000  | -4. 443751000 | -0. 109637000 |
| H | -0. 063443000 | -4. 217090000 | 1. 493822000  |
| H | -3. 122746000 | -3. 972529000 | -0. 385127000 |
| H | -2. 221731000 | -3. 573525000 | -1. 877252000 |
| H | -2. 615872000 | -6. 204397000 | -1. 168282000 |
| H | -1. 091520000 | -5. 679726000 | -1. 904093000 |
| H | -1. 689350000 | -5. 968652000 | 1. 090875000  |
| H | -0. 306327000 | -6. 636263000 | 0. 204466000  |
| C | 4. 349196000  | 0. 557134000  | -0. 602476000 |
| C | 3. 408714000  | 1. 138645000  | -1. 463793000 |
| C | 3. 656922000  | 1. 057729000  | -2. 840002000 |
| C | 4. 787535000  | 0. 422776000  | -3. 348765000 |

|    |               |               |               |
|----|---------------|---------------|---------------|
| C  | 5. 698284000  | -0. 149264000 | -2. 464225000 |
| C  | 5. 486259000  | -0. 084070000 | -1. 089095000 |
| H  | 4. 198480000  | 0. 594076000  | 0. 472577000  |
| H  | 2. 952004000  | 1. 508070000  | -3. 536700000 |
| H  | 4. 962646000  | 0. 372363000  | -4. 418876000 |
| H  | 6. 204540000  | -0. 529929000 | -0. 408289000 |
| C  | 1. 935064000  | -2. 254638000 | -1. 282010000 |
| C  | 1. 620497000  | -1. 407045000 | -0. 191788000 |
| C  | 2. 120781000  | -1. 796557000 | 1. 071796000  |
| C  | 2. 938250000  | -2. 916605000 | 1. 234911000  |
| C  | 3. 261542000  | -3. 693831000 | 0. 127104000  |
| C  | 2. 754786000  | -3. 365794000 | -1. 136385000 |
| H  | 1. 595632000  | -1. 979931000 | -2. 278339000 |
| H  | 1. 932954000  | -1. 160549000 | 1. 933348000  |
| H  | 3. 340054000  | -3. 169009000 | 2. 211543000  |
| H  | 3. 029741000  | -3. 965266000 | -1. 999124000 |
| C  | 0. 774076000  | -0. 198813000 | -0. 338423000 |
| C  | 1. 375646000  | 1. 135876000  | 0. 123232000  |
| H  | 0. 491825000  | -0. 104397000 | -1. 398594000 |
| H  | 1. 996451000  | 0. 980370000  | 1. 013176000  |
| H  | 0. 577232000  | 1. 817441000  | 0. 438245000  |
| C  | -0. 004165000 | 0. 894096000  | 3. 224055000  |
| H  | -0. 065080000 | 1. 821903000  | 2. 652699000  |
| H  | -0. 207908000 | 1. 138126000  | 4. 274921000  |
| H  | 1. 033455000  | 0. 549116000  | 3. 175376000  |
| Cl | 4. 291064000  | -5. 081336000 | 0. 309171000  |
| Cl | 7. 113248000  | -0. 957826000 | -3. 082672000 |
| Si | -2. 991906000 | 1. 868324000  | 1. 884799000  |
| C  | -2. 052035000 | 2. 968973000  | 0. 657753000  |
| H  | -1. 964899000 | 2. 505715000  | -0. 331240000 |
| H  | -2. 601996000 | 3. 910042000  | 0. 535379000  |
| H  | -1. 045754000 | 3. 224649000  | 1. 003450000  |
| C  | -4. 808647000 | 1. 829065000  | 1. 349039000  |
| H  | -5. 434547000 | 1. 246789000  | 2. 032466000  |
| H  | -5. 173043000 | 2. 863600000  | 1. 377871000  |
| H  | -4. 961164000 | 1. 458889000  | 0. 331257000  |
| C  | -2. 961026000 | 2. 672283000  | 3. 602821000  |
| H  | -3. 457452000 | 2. 034129000  | 4. 342578000  |
| H  | -1. 950530000 | 2. 886219000  | 3. 962972000  |
| H  | -3. 506708000 | 3. 622857000  | 3. 565250000  |
| C  | -6. 552697000 | 1. 917190000  | -2. 614486000 |
| C  | -6. 853307000 | 0. 594450000  | -2. 287780000 |
| C  | -5. 813490000 | -0. 304430000 | -2. 088072000 |
| C  | -4. 469305000 | 0. 094519000  | -2. 196205000 |

|    |              |              |              |
|----|--------------|--------------|--------------|
| C  | -4.197477000 | 1.431969000  | -2.539637000 |
| C  | -5.225358000 | 2.338903000  | -2.746570000 |
| H  | -7.887250000 | 0.277868000  | -2.200171000 |
| H  | -6.048860000 | -1.338010000 | -1.844291000 |
| H  | -3.172798000 | 1.766407000  | -2.671156000 |
| C  | -3.423803000 | -0.902076000 | -2.000884000 |
| C  | -2.087290000 | -0.701419000 | -1.921956000 |
| H  | -3.791060000 | -1.926996000 | -1.948522000 |
| H  | -1.401990000 | -1.545031000 | -2.012856000 |
| H  | -1.644206000 | 0.285259000  | -2.019174000 |
| H  | -5.010318000 | 3.366579000  | -3.020152000 |
| Cl | -7.835530000 | 3.047999000  | -2.874371000 |

**pTS3**<sup>a</sup><sub>syn</sub>,  $E_{(\text{SCF Done})} = -3794.022319$  a.u. **IF** =  $i209.22$  cm<sup>-1</sup>

|    |              |              |              |
|----|--------------|--------------|--------------|
| Sc | 1.299848000  | 1.292100000  | 0.119207000  |
| Si | -3.443334000 | -4.308259000 | 2.230749000  |
| C  | -2.926832000 | -2.659591000 | 1.397606000  |
| C  | -1.927222000 | -5.411609000 | 2.522773000  |
| C  | -4.684159000 | -5.206670000 | 1.113801000  |
| C  | -4.254054000 | -3.882360000 | 3.890836000  |
| C  | 1.366282000  | 2.934075000  | 3.397447000  |
| C  | 1.944568000  | 1.893077000  | 2.483097000  |
| C  | 3.117665000  | 2.044599000  | 1.693313000  |
| C  | 3.477848000  | 0.765776000  | 1.181771000  |
| C  | 2.538502000  | -0.209828000 | 1.666116000  |
| C  | 1.583407000  | 0.513599000  | 2.458688000  |
| C  | 3.968451000  | 3.277198000  | 1.608746000  |
| C  | 4.753716000  | 0.517974000  | 0.431876000  |
| C  | -2.221182000 | -2.804509000 | 0.046407000  |
| C  | -2.004790000 | -1.503815000 | -0.772850000 |
| H  | -2.301280000 | -2.102033000 | 2.110504000  |
| H  | -3.851631000 | -2.078008000 | 1.279343000  |
| H  | -1.418116000 | -5.663853000 | 1.585309000  |
| H  | -2.228951000 | -6.353073000 | 2.996390000  |
| H  | -1.198477000 | -4.928980000 | 3.184313000  |
| H  | -5.548948000 | -4.572409000 | 0.887414000  |
| H  | -5.056647000 | -6.112126000 | 1.606694000  |
| H  | -4.233065000 | -5.513637000 | 0.163258000  |
| H  | -3.560077000 | -3.350155000 | 4.552152000  |
| H  | -4.575021000 | -4.791845000 | 4.411640000  |
| H  | -5.139052000 | -3.250461000 | 3.752654000  |
| H  | 1.294482000  | 3.926945000  | 2.940688000  |
| H  | 2.000187000  | 3.039439000  | 4.288141000  |
| H  | 0.370304000  | 2.658636000  | 3.755086000  |

|   |               |               |               |
|---|---------------|---------------|---------------|
| H | 3. 427623000  | 4. 178311000  | 1. 911984000  |
| H | 4. 378344000  | 3. 445991000  | 0. 607440000  |
| H | 4. 828339000  | 3. 183580000  | 2. 285511000  |
| H | 5. 016189000  | 1. 362884000  | -0. 216044000 |
| H | 4. 701683000  | -0. 379068000 | -0. 184435000 |
| H | 5. 592266000  | 0. 392206000  | 1. 130275000  |
| H | -2. 798323000 | -3. 481202000 | -0. 597277000 |
| H | -1. 243554000 | -3. 284366000 | 0. 188892000  |
| H | -1. 483306000 | -1. 811621000 | -1. 692263000 |
| C | 1. 445486000  | 4. 520940000  | -0. 326426000 |
| O | 1. 864023000  | 3. 237237000  | -0. 897845000 |
| C | 2. 772627000  | 3. 486004000  | -2. 016823000 |
| C | 2. 674660000  | 4. 976261000  | -2. 298896000 |
| C | 2. 388668000  | 5. 555862000  | -0. 913300000 |
| H | 0. 411860000  | 4. 690551000  | -0. 631910000 |
| H | 1. 494883000  | 4. 430391000  | 0. 759074000  |
| H | 3. 780162000  | 3. 193584000  | -1. 702335000 |
| H | 2. 459782000  | 2. 863177000  | -2. 856906000 |
| H | 3. 592829000  | 5. 363729000  | -2. 748623000 |
| H | 1. 845716000  | 5. 184243000  | -2. 984522000 |
| H | 3. 308814000  | 5. 629534000  | -0. 324049000 |
| H | 1. 927040000  | 6. 546374000  | -0. 950435000 |
| C | -4. 066907000 | -0. 013361000 | -0. 423263000 |
| C | -3. 322975000 | -0. 894349000 | -1. 219424000 |
| C | -3. 855426000 | -1. 254183000 | -2. 464173000 |
| C | -5. 081689000 | -0. 764633000 | -2. 906376000 |
| C | -5. 796946000 | 0. 109996000  | -2. 091201000 |
| C | -5. 294907000 | 0. 489816000  | -0. 848477000 |
| H | -3. 692688000 | 0. 295601000  | 0. 549038000  |
| H | -3. 303870000 | -1. 939693000 | -3. 105132000 |
| H | -5. 479256000 | -1. 055569000 | -3. 873450000 |
| H | -5. 860704000 | 1. 170510000  | -0. 220301000 |
| C | -1. 721049000 | 3. 100210000  | -1. 185979000 |
| C | -1. 210750000 | 2. 076019000  | -0. 341603000 |
| C | -1. 059497000 | 2. 387850000  | 1. 026962000  |
| C | -1. 446328000 | 3. 639290000  | 1. 539372000  |
| C | -1. 975835000 | 4. 594410000  | 0. 689710000  |
| C | -2. 118045000 | 4. 322755000  | -0. 684554000 |
| H | -1. 871750000 | 2. 886060000  | -2. 241165000 |
| H | -0. 813690000 | 1. 604794000  | 1. 741117000  |
| H | -1. 375783000 | 3. 842147000  | 2. 602339000  |
| H | -2. 561134000 | 5. 069622000  | -1. 336447000 |
| C | -0. 869146000 | 0. 771788000  | -0. 909003000 |
| C | -1. 072859000 | -0. 490705000 | -0. 062157000 |

|    |              |              |              |
|----|--------------|--------------|--------------|
| H  | -1.374909000 | 0.669498000  | -1.864282000 |
| H  | -1.494196000 | -0.235176000 | 0.917933000  |
| H  | -0.126984000 | -1.023012000 | 0.155753000  |
| C  | 0.512555000  | -0.091348000 | 3.325758000  |
| H  | 0.179537000  | -1.061643000 | 2.951725000  |
| H  | 0.891512000  | -0.247393000 | 4.344006000  |
| H  | -0.373421000 | 0.545817000  | 3.428512000  |
| Cl | -2.491153000 | 6.128161000  | 1.313390000  |
| Cl | -7.326282000 | 0.739524000  | -2.631673000 |
| Si | 2.886569000  | -2.085863000 | 1.939641000  |
| C  | 1.437012000  | -3.230093000 | 1.516604000  |
| H  | 1.236052000  | -3.238006000 | 0.441411000  |
| H  | 1.720786000  | -4.250757000 | 1.801695000  |
| H  | 0.510549000  | -2.994074000 | 2.048256000  |
| C  | 4.403496000  | -2.730126000 | 1.015670000  |
| H  | 5.321734000  | -2.207854000 | 1.301177000  |
| H  | 4.527806000  | -3.783029000 | 1.298300000  |
| H  | 4.298923000  | -2.693604000 | -0.071868000 |
| C  | 3.265801000  | -2.241721000 | 3.794124000  |
| H  | 4.069845000  | -1.559478000 | 4.092352000  |
| H  | 2.396472000  | -2.039746000 | 4.427273000  |
| H  | 3.599878000  | -3.263825000 | 4.009844000  |
| C  | 3.605712000  | -3.677938000 | -2.862660000 |
| C  | 4.447645000  | -2.567900000 | -2.898553000 |
| C  | 3.955134000  | -1.322464000 | -2.520336000 |
| C  | 2.625470000  | -1.149045000 | -2.098614000 |
| C  | 1.804621000  | -2.287271000 | -2.075885000 |
| C  | 2.280485000  | -3.539179000 | -2.453008000 |
| H  | 5.474797000  | -2.675441000 | -3.232285000 |
| H  | 4.613757000  | -0.459883000 | -2.590929000 |
| H  | 0.767494000  | -2.201894000 | -1.763219000 |
| C  | 2.117266000  | 0.215722000  | -1.843275000 |
| C  | 0.835479000  | 0.601942000  | -2.278412000 |
| H  | 2.899097000  | 0.978499000  | -1.858562000 |
| H  | 0.662881000  | 1.613237000  | -2.642411000 |
| H  | 0.248853000  | -0.149050000 | -2.797684000 |
| H  | 1.627832000  | -4.406208000 | -2.430085000 |
| Cl | 4.205700000  | -5.238055000 | -3.336392000 |

**$pP3$ '<sup>a</sup><sub>syn</sub>,  $E_{(SCF Done)} = -3794.071466$  a.u.**

|    |              |              |              |
|----|--------------|--------------|--------------|
| Sc | -2.539624000 | -0.375222000 | -0.137390000 |
| Si | 5.628187000  | 1.726921000  | 2.876252000  |
| C  | 4.553062000  | 0.464036000  | 1.916775000  |
| C  | 4.586149000  | 3.249462000  | 3.329108000  |

|   |              |              |              |
|---|--------------|--------------|--------------|
| C | 7.104512000  | 2.255868000  | 1.810434000  |
| C | 6.241583000  | 0.882588000  | 4.459546000  |
| C | -5.610588000 | -1.251420000 | 1.590785000  |
| C | -4.786902000 | -0.153132000 | 0.978022000  |
| C | -4.900937000 | 0.346033000  | -0.350320000 |
| C | -4.062188000 | 1.496880000  | -0.463564000 |
| C | -3.406453000 | 1.718757000  | 0.795951000  |
| C | -3.873529000 | 0.682114000  | 1.679828000  |
| C | -5.869389000 | -0.139075000 | -1.390014000 |
| C | -4.037559000 | 2.389546000  | -1.670893000 |
| C | 3.961044000  | 0.981873000  | 0.603863000  |
| C | 3.136212000  | -0.024092000 | -0.247191000 |
| H | 3.758390000  | 0.130685000  | 2.600336000  |
| H | 5.185084000  | -0.414404000 | 1.726273000  |
| H | 4.245615000  | 3.787061000  | 2.436672000  |
| H | 5.174700000  | 3.952119000  | 3.930344000  |
| H | 3.703207000  | 2.970606000  | 3.916530000  |
| H | 7.710521000  | 1.391263000  | 1.516114000  |
| H | 7.753750000  | 2.943473000  | 2.364759000  |
| H | 6.784795000  | 2.769984000  | 0.896739000  |
| H | 5.405848000  | 0.562018000  | 5.092546000  |
| H | 6.862109000  | 1.566308000  | 5.050259000  |
| H | 6.847942000  | -0.001120000 | 4.229522000  |
| H | -6.152589000 | -1.828846000 | 0.835817000  |
| H | -6.370149000 | -0.827227000 | 2.260486000  |
| H | -5.019418000 | -1.952940000 | 2.191301000  |
| H | -6.061331000 | -1.213963000 | -1.315495000 |
| H | -5.529430000 | 0.072128000  | -2.408649000 |
| H | -6.837817000 | 0.365231000  | -1.273510000 |
| H | -4.259886000 | 1.839624000  | -2.591600000 |
| H | -3.076815000 | 2.885483000  | -1.803523000 |
| H | -4.806033000 | 3.168615000  | -1.577819000 |
| H | 4.768024000  | 1.357843000  | -0.038262000 |
| H | 3.312960000  | 1.846613000  | 0.810459000  |
| H | 2.785418000  | 0.553045000  | -1.113540000 |
| C | -3.748219000 | -3.323422000 | -0.876744000 |
| O | -3.081851000 | -2.118057000 | -1.380724000 |
| C | -3.060389000 | -2.154770000 | -2.849358000 |
| C | -3.526979000 | -3.552247000 | -3.224684000 |
| C | -4.470886000 | -3.910321000 | -2.075520000 |
| H | -2.970652000 | -3.992906000 | -0.499797000 |
| H | -4.402639000 | -3.022664000 | -0.057030000 |
| H | -3.745368000 | -1.380204000 | -3.206443000 |
| H | -2.043868000 | -1.927490000 | -3.174747000 |

|    |              |              |              |
|----|--------------|--------------|--------------|
| H  | -4.016915000 | -3.564362000 | -4.201899000 |
| H  | -2.679329000 | -4.245424000 | -3.261028000 |
| H  | -5.449255000 | -3.437696000 | -2.213928000 |
| H  | -4.624971000 | -4.987371000 | -1.967370000 |
| C  | 4.317938000  | -2.295769000 | -0.062167000 |
| C  | 3.999924000  | -1.145411000 | -0.797846000 |
| C  | 4.544261000  | -1.027592000 | -2.083319000 |
| C  | 5.374270000  | -2.007200000 | -2.622169000 |
| C  | 5.668199000  | -3.139293000 | -1.865698000 |
| C  | 5.143614000  | -3.289801000 | -0.584231000 |
| H  | 3.923220000  | -2.429410000 | 0.941881000  |
| H  | 4.319832000  | -0.145185000 | -2.679581000 |
| H  | 5.787883000  | -1.896830000 | -3.619531000 |
| H  | 5.383344000  | -4.173106000 | -0.000464000 |
| C  | -0.168934000 | -3.523364000 | 0.560791000  |
| C  | -0.041747000 | -2.127340000 | 0.589335000  |
| C  | -0.853419000 | -1.425569000 | 1.505553000  |
| C  | -1.748888000 | -2.095781000 | 2.354892000  |
| C  | -1.850209000 | -3.484756000 | 2.288787000  |
| C  | -1.050658000 | -4.202912000 | 1.398905000  |
| H  | 0.463955000  | -4.097297000 | -0.111980000 |
| H  | -0.687426000 | -0.354966000 | 1.663279000  |
| H  | -2.312852000 | -1.548985000 | 3.100528000  |
| H  | -1.107219000 | -5.287363000 | 1.376233000  |
| C  | 0.958851000  | -1.432790000 | -0.304650000 |
| C  | 1.891282000  | -0.516731000 | 0.510598000  |
| H  | 1.603386000  | -2.224141000 | -0.709692000 |
| H  | 2.204088000  | -1.070083000 | 1.405324000  |
| H  | 1.343645000  | 0.356514000  | 0.888901000  |
| C  | -3.663729000 | 0.614155000  | 3.168354000  |
| H  | -2.624994000 | 0.774577000  | 3.474353000  |
| H  | -4.260834000 | 1.388878000  | 3.664438000  |
| H  | -4.000329000 | -0.340868000 | 3.583329000  |
| Cl | -2.943345000 | -4.321550000 | 3.344219000  |
| Cl | 6.694657000  | -4.380187000 | -2.529039000 |
| Si | -2.523714000 | 3.308994000  | 1.417506000  |
| C  | -0.898068000 | 2.885381000  | 2.302760000  |
| H  | -0.227669000 | 2.307376000  | 1.658587000  |
| H  | -0.377186000 | 3.814535000  | 2.563271000  |
| H  | -1.052146000 | 2.333289000  | 3.235807000  |
| C  | -2.185176000 | 4.561288000  | 0.045355000  |
| H  | -3.111995000 | 4.927048000  | -0.407994000 |
| H  | -1.684146000 | 5.424932000  | 0.500289000  |
| H  | -1.531378000 | 4.181899000  | -0.743823000 |

|    |              |              |              |
|----|--------------|--------------|--------------|
| C  | -3.698657000 | 4.152539000  | 2.647380000  |
| H  | -4.687312000 | 4.314015000  | 2.203312000  |
| H  | -3.830491000 | 3.593486000  | 3.578564000  |
| H  | -3.290699000 | 5.135666000  | 2.911912000  |
| C  | 0.588503000  | 4.103466000  | -2.815579000 |
| C  | -0.396403000 | 3.422227000  | -3.526396000 |
| C  | -0.857919000 | 2.197303000  | -3.050602000 |
| C  | -0.380818000 | 1.621267000  | -1.858734000 |
| C  | 0.605903000  | 2.345275000  | -1.169807000 |
| C  | 1.094081000  | 3.564053000  | -1.635067000 |
| H  | -0.783656000 | 3.836238000  | -4.452262000 |
| H  | -1.600960000 | 1.663551000  | -3.640767000 |
| H  | 1.011447000  | 1.955179000  | -0.243295000 |
| C  | -0.851377000 | 0.260722000  | -1.432080000 |
| C  | 0.266069000  | -0.827071000 | -1.556354000 |
| H  | -1.592553000 | -0.014974000 | -2.224930000 |
| H  | -0.155222000 | -1.694013000 | -2.086470000 |
| H  | 1.058530000  | -0.452824000 | -2.218434000 |
| H  | 1.859970000  | 4.096878000  | -1.080140000 |
| Cl | 1.191015000  | 5.625971000  | -3.404003000 |

$pC3^{a}_{iso}, E_{(SCF Done)} = -3794.04118 \text{ a.u.}$

|    |              |              |              |
|----|--------------|--------------|--------------|
| Sc | 1.039280000  | -1.083077000 | 0.885705000  |
| Si | -6.803717000 | -0.925746000 | -1.513427000 |
| C  | -5.137544000 | -0.196565000 | -0.914342000 |
| C  | -6.548665000 | -2.691725000 | -2.164626000 |
| C  | -7.524875000 | 0.164235000  | -2.887612000 |
| C  | -7.988307000 | -0.962621000 | -0.032107000 |
| C  | 0.641744000  | -2.075026000 | 4.307708000  |
| C  | 0.743935000  | -2.541639000 | 2.881284000  |
| C  | 1.913176000  | -3.016661000 | 2.218939000  |
| C  | 1.518953000  | -3.513024000 | 0.946210000  |
| C  | 0.091762000  | -3.379774000 | 0.804003000  |
| C  | -0.372511000 | -2.775328000 | 2.017703000  |
| C  | 3.300562000  | -3.138610000 | 2.784325000  |
| C  | 2.449381000  | -4.277072000 | 0.044852000  |
| C  | -4.042507000 | -0.110586000 | -1.981065000 |
| C  | -2.685591000 | 0.516464000  | -1.555623000 |
| H  | -4.802852000 | -0.801463000 | -0.058402000 |
| H  | -5.355071000 | 0.803979000  | -0.516182000 |
| H  | -5.873413000 | -2.713520000 | -3.027811000 |
| H  | -7.504418000 | -3.122940000 | -2.484506000 |
| H  | -6.132617000 | -3.348030000 | -1.391077000 |
| H  | -7.658178000 | 1.197517000  | -2.546771000 |



|   |              |              |              |
|---|--------------|--------------|--------------|
| H | -8.505950000 | -0.211364000 | -3.200744000 |
| H | -6.881050000 | 0.182715000  | -3.774381000 |
| H | -7.595928000 | -1.587333000 | 0.779019000  |
| H | -8.963833000 | -1.369996000 | -0.321868000 |
| H | -8.155152000 | 0.043768000  | 0.369097000  |
| H | 1.624240000  | -1.940696000 | 4.768129000  |
| H | 0.106491000  | -2.817030000 | 4.913672000  |
| H | 0.101189000  | -1.127648000 | 4.410901000  |
| H | 3.345204000  | -2.821847000 | 3.830115000  |
| H | 4.047890000  | -2.558976000 | 2.227545000  |
| H | 3.628052000  | -4.185196000 | 2.761597000  |
| H | 3.482587000  | -3.924022000 | 0.128406000  |
| H | 2.158024000  | -4.238341000 | -1.008900000 |
| H | 2.463068000  | -5.336686000 | 0.331633000  |
| H | -4.413141000 | 0.470803000  | -2.835566000 |
| H | -3.827728000 | -1.116222000 | -2.371005000 |
| H | -2.051981000 | 0.467075000  | -2.455462000 |
| C | 3.043487000  | 0.351021000  | 3.015827000  |
| O | 2.785659000  | 0.069396000  | 1.598673000  |
| C | 3.616728000  | 0.947329000  | 0.771312000  |
| C | 4.204540000  | 1.969063000  | 1.729003000  |
| C | 4.320281000  | 1.172702000  | 3.029194000  |
| H | 2.186988000  | 0.908939000  | 3.402765000  |
| H | 3.126517000  | -0.606852000 | 3.527215000  |
| H | 4.385723000  | 0.326749000  | 0.305679000  |
| H | 2.981060000  | 1.381592000  | -0.003656000 |
| H | 5.163796000  | 2.352625000  | 1.370850000  |
| H | 3.519880000  | 2.813163000  | 1.858107000  |
| H | 5.200946000  | 0.520650000  | 3.010882000  |
| H | 4.382655000  | 1.808429000  | 3.916417000  |
| C | -3.276353000 | 2.434676000  | 0.037985000  |
| C | -2.817105000 | 1.987008000  | -1.208334000 |
| C | -2.512313000 | 2.957519000  | -2.171139000 |
| C | -2.651863000 | 4.319531000  | -1.913875000 |
| C | -3.106340000 | 4.729301000  | -0.662946000 |
| C | -3.422524000 | 3.791668000  | 0.317576000  |
| H | -3.523618000 | 1.717828000  | 0.816010000  |
| H | -2.164250000 | 2.643053000  | -3.153550000 |
| H | -2.413603000 | 5.056286000  | -2.674617000 |
| H | -3.779803000 | 4.121617000  | 1.288040000  |
| C | 0.401310000  | 2.328753000  | 0.650040000  |
| C | -0.299798000 | 1.113419000  | 0.854773000  |
| C | -0.677677000 | 0.823667000  | 2.188833000  |
| C | -0.430483000 | 1.713316000  | 3.241780000  |

|    |              |              |              |
|----|--------------|--------------|--------------|
| C  | 0.235653000  | 2.905160000  | 2.987504000  |
| C  | 0.651258000  | 3.215876000  | 1.684968000  |
| H  | 0.671714000  | 2.611968000  | -0.364711000 |
| H  | -1.277877000 | -0.061130000 | 2.388516000  |
| H  | -0.776432000 | 1.488685000  | 4.246446000  |
| H  | 1.132055000  | 4.169884000  | 1.489025000  |
| C  | -0.518472000 | 0.126925000  | -0.216960000 |
| C  | -1.960142000 | -0.327997000 | -0.483535000 |
| H  | -0.079861000 | 0.505369000  | -1.150426000 |
| H  | -2.534093000 | -0.318907000 | 0.450917000  |
| H  | -1.976785000 | -1.366960000 | -0.833955000 |
| C  | -1.797542000 | -2.605399000 | 2.463828000  |
| H  | -2.460444000 | -2.267001000 | 1.665609000  |
| H  | -2.192474000 | -3.562915000 | 2.828102000  |
| H  | -1.880237000 | -1.904651000 | 3.300885000  |
| Cl | 0.548159000  | 4.023611000  | 4.280213000  |
| Cl | -3.275626000 | 6.429550000  | -0.319080000 |
| Si | -0.928289000 | -4.342496000 | -0.509660000 |
| C  | -2.798901000 | -4.236500000 | -0.236134000 |
| H  | -3.212444000 | -3.230860000 | -0.352391000 |
| H  | -3.272037000 | -4.872616000 | -0.994620000 |
| H  | -3.096547000 | -4.624327000 | 0.742986000  |
| C  | -0.562286000 | -3.782843000 | -2.288620000 |
| H  | 0.477703000  | -3.948916000 | -2.590266000 |
| H  | -1.187909000 | -4.372786000 | -2.969759000 |
| H  | -0.805171000 | -2.727643000 | -2.456539000 |
| C  | -0.464252000 | -6.173947000 | -0.333866000 |
| H  | 0.566469000  | -6.390066000 | -0.630390000 |
| H  | -0.600271000 | -6.518017000 | 0.697652000  |
| H  | -1.122393000 | -6.774544000 | -0.973251000 |
| C  | 6.450908000  | 1.131430000  | -3.343249000 |
| C  | 6.795995000  | -0.038055000 | -2.665701000 |
| C  | 5.787373000  | -0.844565000 | -2.152716000 |
| C  | 4.430951000  | -0.504548000 | -2.298972000 |
| C  | 4.113674000  | 0.674446000  | -2.999138000 |
| C  | 5.109458000  | 1.488933000  | -3.516469000 |
| H  | 7.839608000  | -0.311523000 | -2.550354000 |
| H  | 6.057427000  | -1.761436000 | -1.633229000 |
| H  | 3.076189000  | 0.952850000  | -3.161505000 |
| H  | 4.858516000  | 2.392432000  | -4.062578000 |
| C  | 3.420922000  | -1.395691000 | -1.735740000 |
| C  | 2.080626000  | -1.217781000 | -1.711885000 |
| H  | 3.817146000  | -2.315186000 | -1.308120000 |
| H  | 1.424749000  | -2.046583000 | -1.438149000 |

|    |             |              |              |
|----|-------------|--------------|--------------|
| H  | 1.601591000 | -0.365075000 | -2.181990000 |
| Cl | 7.693837000 | 2.149030000  | -3.986627000 |

***p*TS3<sup>a</sup><sub>iso</sub>,  $E_{(\text{SCF Done})} = -3794.020125$  a.u. **IF** =  $i268.9$  cm<sup>-1</sup>**

|    |              |              |              |
|----|--------------|--------------|--------------|
| Sc | -1.541743000 | -1.054468000 | -0.454199000 |
| Si | 6.695810000  | -0.944566000 | 1.168047000  |
| C  | 4.993582000  | -0.227128000 | 0.655238000  |
| C  | 6.449917000  | -2.431816000 | 2.322354000  |
| C  | 7.711362000  | 0.391764000  | 2.049400000  |
| C  | 7.589426000  | -1.501432000 | -0.409112000 |
| C  | -2.385456000 | -2.545128000 | -3.715024000 |
| C  | -1.944747000 | -2.764360000 | -2.293199000 |
| C  | -2.754802000 | -3.126707000 | -1.176521000 |
| C  | -1.886570000 | -3.504819000 | -0.113820000 |
| C  | -0.519772000 | -3.370980000 | -0.550100000 |
| C  | -0.582222000 | -2.914760000 | -1.907830000 |
| C  | -4.251850000 | -3.259302000 | -1.142448000 |
| C  | -2.359799000 | -4.194208000 | 1.135483000  |
| C  | 4.099406000  | 0.206403000  | 1.819010000  |
| C  | 2.724433000  | 0.835054000  | 1.464239000  |
| H  | 4.492560000  | -0.987487000 | 0.037956000  |
| H  | 5.195489000  | 0.625094000  | -0.007913000 |
| H  | 5.960241000  | -2.142926000 | 3.259365000  |
| H  | 7.416612000  | -2.878388000 | 2.582776000  |
| H  | 5.842880000  | -3.212521000 | 1.848791000  |
| H  | 7.867800000  | 1.263373000  | 1.403356000  |
| H  | 8.698108000  | 0.003722000  | 2.327473000  |
| H  | 7.223498000  | 0.737059000  | 2.968102000  |
| H  | 7.026396000  | -2.280943000 | -0.935718000 |
| H  | 8.578284000  | -1.910039000 | -0.171283000 |
| H  | 7.735228000  | -0.664712000 | -1.102119000 |
| H  | -3.471051000 | -2.609520000 | -3.826406000 |
| H  | -1.961352000 | -3.327212000 | -4.357023000 |
| H  | -2.063098000 | -1.584381000 | -4.133547000 |
| H  | -4.719349000 | -2.912454000 | -2.068140000 |
| H  | -4.710531000 | -2.705537000 | -0.314139000 |
| H  | -4.540260000 | -4.310912000 | -1.020204000 |
| H  | -3.415141000 | -3.987335000 | 1.342261000  |
| H  | -1.785492000 | -3.921350000 | 2.025282000  |
| H  | -2.272924000 | -5.282696000 | 1.020412000  |
| H  | 4.634389000  | 0.940352000  | 2.435684000  |
| H  | 3.904014000  | -0.653891000 | 2.475688000  |
| H  | 2.251524000  | 1.058315000  | 2.433769000  |
| C  | -3.867222000 | 0.130434000  | -2.464936000 |

|    |              |              |              |
|----|--------------|--------------|--------------|
| O  | -3.260957000 | 0.162294000  | -1.129935000 |
| C  | -3.921364000 | 1.208977000  | -0.335675000 |
| C  | -4.632880000 | 2.082972000  | -1.347872000 |
| C  | -5.065798000 | 1.063066000  | -2.399733000 |
| H  | -3.110871000 | 0.477403000  | -3.173303000 |
| H  | -4.129424000 | -0.902227000 | -2.681099000 |
| H  | -4.616633000 | 0.716487000  | 0.347454000  |
| H  | -3.153707000 | 1.718566000  | 0.245488000  |
| H  | -5.472001000 | 2.619257000  | -0.896313000 |
| H  | -3.945748000 | 2.817883000  | -1.780831000 |
| H  | -5.958821000 | 0.522300000  | -2.067115000 |
| H  | -5.281251000 | 1.511006000  | -3.373499000 |
| C  | 3.107996000  | 2.254867000  | -0.635737000 |
| C  | 2.860461000  | 2.162203000  | 0.740744000  |
| C  | 2.777142000  | 3.357273000  | 1.466516000  |
| C  | 2.928552000  | 4.599970000  | 0.855699000  |
| C  | 3.168065000  | 4.656915000  | -0.515263000 |
| C  | 3.261470000  | 3.487376000  | -1.266914000 |
| H  | 3.184390000  | 1.353155000  | -1.237128000 |
| H  | 2.597407000  | 3.319969000  | 2.539499000  |
| H  | 2.863084000  | 5.515287000  | 1.435330000  |
| H  | 3.455763000  | 3.542862000  | -2.333396000 |
| C  | -0.672133000 | 2.203771000  | -0.759667000 |
| C  | -0.028278000 | 0.939758000  | -0.686498000 |
| C  | 0.184970000  | 0.261881000  | -1.909827000 |
| C  | -0.175012000 | 0.832671000  | -3.141247000 |
| C  | -0.769626000 | 2.084713000  | -3.167459000 |
| C  | -1.011763000 | 2.778506000  | -1.969404000 |
| H  | -0.826420000 | 2.768097000  | 0.156513000  |
| H  | 0.771848000  | -0.651218000 | -1.918641000 |
| H  | 0.047197000  | 0.316020000  | -4.069633000 |
| H  | -1.434274000 | 3.778085000  | -2.004605000 |
| C  | 0.362179000  | 0.377052000  | 0.615656000  |
| C  | 1.784017000  | -0.170477000 | 0.762690000  |
| H  | 0.175485000  | 1.149634000  | 1.360674000  |
| H  | 2.187916000  | -0.452849000 | -0.216170000 |
| H  | 1.792610000  | -1.088820000 | 1.364070000  |
| C  | 0.546032000  | -2.856110000 | -2.899179000 |
| H  | 1.496460000  | -2.547461000 | -2.457317000 |
| H  | 0.712758000  | -3.850363000 | -3.336016000 |
| H  | 0.322207000  | -2.184704000 | -3.734417000 |
| Cl | -1.203585000 | 2.812832000  | -4.680071000 |
| Cl | 3.347278000  | 6.201784000  | -1.298339000 |
| Si | 0.940870000  | -4.362321000 | 0.211527000  |

|    |              |              |              |
|----|--------------|--------------|--------------|
| C  | 2.639079000  | -3.891836000 | -0.491928000 |
| H  | 2.865618000  | -2.824286000 | -0.404231000 |
| H  | 3.394941000  | -4.431405000 | 0.092103000  |
| H  | 2.765641000  | -4.191750000 | -1.536228000 |
| C  | 1.098347000  | -4.238296000 | 2.100986000  |
| H  | 0.199343000  | -4.541157000 | 2.644792000  |
| H  | 1.898667000  | -4.927596000 | 2.398635000  |
| H  | 1.394509000  | -3.243192000 | 2.450260000  |
| C  | 0.603708000  | -6.171474000 | -0.247292000 |
| H  | -0.316437000 | -6.551153000 | 0.209061000  |
| H  | 0.514859000  | -6.292989000 | -1.332586000 |
| H  | 1.430085000  | -6.805988000 | 0.094411000  |
| C  | -4.678145000 | 1.871642000  | 3.794867000  |
| C  | -5.176323000 | 0.625008000  | 3.412871000  |
| C  | -4.335549000 | -0.282299000 | 2.780002000  |
| C  | -2.984655000 | 0.015737000  | 2.512852000  |
| C  | -2.512185000 | 1.274939000  | 2.926729000  |
| C  | -3.343032000 | 2.195681000  | 3.558485000  |
| H  | -6.210562000 | 0.368231000  | 3.619949000  |
| H  | -4.731019000 | -1.257477000 | 2.501953000  |
| H  | -1.471520000 | 1.546581000  | 2.769985000  |
| H  | -2.956432000 | 3.158973000  | 3.876569000  |
| C  | -2.134847000 | -0.989170000 | 1.865164000  |
| C  | -0.721317000 | -0.943780000 | 1.900710000  |
| H  | -2.587469000 | -1.972387000 | 1.782697000  |
| H  | -0.206857000 | -1.878449000 | 1.680336000  |
| H  | -0.216349000 | -0.372475000 | 2.674266000  |
| Cl | -5.721978000 | 3.018744000  | 4.577801000  |

**pP3**<sup>a</sup><sub>iso</sub>,  $E_{(\text{SCF Done})} = -3794.039282$  a.u.

|    |              |              |              |
|----|--------------|--------------|--------------|
| Sc | 2.592051000  | -0.367822000 | -0.116837000 |
| Si | -7.178647000 | -2.571623000 | 0.689449000  |
| C  | -5.694814000 | -1.361084000 | 0.625779000  |
| C  | -6.564356000 | -4.356740000 | 0.485482000  |
| C  | -8.411558000 | -2.156036000 | -0.690494000 |
| C  | -8.014939000 | -2.375353000 | 2.380342000  |
| C  | 5.323609000  | -2.258860000 | 1.423250000  |
| C  | 4.496920000  | -1.993782000 | 0.195150000  |
| C  | 4.826816000  | -1.131234000 | -0.892680000 |
| C  | 3.899603000  | -1.387699000 | -1.947249000 |
| C  | 2.968725000  | -2.393057000 | -1.522021000 |
| C  | 3.359188000  | -2.760389000 | -0.189158000 |
| C  | 6.027927000  | -0.231881000 | -0.996267000 |
| C  | 4.032908000  | -0.828536000 | -3.338132000 |

|   |              |              |              |
|---|--------------|--------------|--------------|
| C | -4.895783000 | -1.384747000 | -0.679480000 |
| C | -3.673784000 | -0.429667000 | -0.785103000 |
| H | -5.050639000 | -1.599692000 | 1.484823000  |
| H | -6.094275000 | -0.354199000 | 0.809239000  |
| H | -6.102604000 | -4.520040000 | -0.495117000 |
| H | -7.399409000 | -5.061264000 | 0.575646000  |
| H | -5.827765000 | -4.617684000 | 1.254663000  |
| H | -8.773871000 | -1.125034000 | -0.604352000 |
| H | -9.282813000 | -2.819298000 | -0.639153000 |
| H | -7.966070000 | -2.274333000 | -1.684890000 |
| H | -7.322563000 | -2.604000000 | 3.199084000  |
| H | -8.872190000 | -3.052227000 | 2.472202000  |
| H | -8.382723000 | -1.353055000 | 2.526274000  |
| H | 6.125459000  | -1.527534000 | 1.551063000  |
| H | 5.806912000  | -3.240904000 | 1.341019000  |
| H | 4.736260000  | -2.272785000 | 2.348617000  |
| H | 6.513890000  | -0.076464000 | -0.028754000 |
| H | 5.785775000  | 0.756946000  | -1.402477000 |
| H | 6.782673000  | -0.672768000 | -1.660182000 |
| H | 4.741941000  | 0.004595000  | -3.376312000 |
| H | 3.084637000  | -0.483569000 | -3.761767000 |
| H | 4.423550000  | -1.598566000 | -4.016087000 |
| H | -5.562720000 | -1.147307000 | -1.518330000 |
| H | -4.524531000 | -2.402772000 | -0.866413000 |
| H | -3.252305000 | -0.617795000 | -1.782324000 |
| C | 4.426653000  | 0.825341000  | 2.364512000  |
| O | 3.277636000  | 0.985421000  | 1.469886000  |
| C | 2.577224000  | 2.236191000  | 1.806032000  |
| C | 3.121371000  | 2.641406000  | 3.162452000  |
| C | 4.568495000  | 2.154466000  | 3.087072000  |
| H | 4.197636000  | 0.006437000  | 3.051822000  |
| H | 5.288425000  | 0.565640000  | 1.751316000  |
| H | 2.820481000  | 2.961803000  | 1.027782000  |
| H | 1.508407000  | 2.024350000  | 1.795523000  |
| H | 3.040176000  | 3.720065000  | 3.322274000  |
| H | 2.582987000  | 2.130983000  | 3.968496000  |
| H | 5.180712000  | 2.850308000  | 2.502683000  |
| H | 5.033351000  | 2.031809000  | 4.069023000  |
| C | -4.338670000 | 1.723880000  | 0.437509000  |
| C | -4.071947000 | 1.034688000  | -0.754628000 |
| C | -4.209184000 | 1.742702000  | -1.955609000 |
| C | -4.596326000 | 3.080585000  | -1.980802000 |
| C | -4.851025000 | 3.735852000  | -0.778343000 |
| C | -4.725698000 | 3.062508000  | 0.435011000  |

|    |              |              |              |
|----|--------------|--------------|--------------|
| H  | -4.254229000 | 1.212507000  | 1.392922000  |
| H  | -4.015612000 | 1.235818000  | -2.899121000 |
| H  | -4.699223000 | 3.611035000  | -2.922191000 |
| H  | -4.935549000 | 3.580329000  | 1.365882000  |
| C  | -0.580465000 | 0.440780000  | 2.507535000  |
| C  | -0.398369000 | -0.268174000 | 1.311875000  |
| C  | 0.554024000  | -1.304898000 | 1.314741000  |
| C  | 1.291710000  | -1.616898000 | 2.465998000  |
| C  | 1.091568000  | -0.878540000 | 3.630573000  |
| C  | 0.144730000  | 0.144344000  | 3.659735000  |
| H  | -1.322317000 | 1.235649000  | 2.542490000  |
| H  | 0.638727000  | -1.955195000 | 0.440238000  |
| H  | 1.983282000  | -2.451201000 | 2.470734000  |
| H  | -0.026620000 | 0.698871000  | 4.577547000  |
| C  | -1.278888000 | 0.033176000  | 0.122552000  |
| C  | -2.588049000 | -0.787940000 | 0.244508000  |
| H  | -1.573714000 | 1.085050000  | 0.216063000  |
| H  | -2.984470000 | -0.665817000 | 1.259801000  |
| H  | -2.348504000 | -1.856691000 | 0.143326000  |
| C  | 2.860101000  | -3.950369000 | 0.585941000  |
| H  | 1.770809000  | -3.997166000 | 0.673504000  |
| H  | 3.174068000  | -4.877592000 | 0.089270000  |
| H  | 3.284321000  | -3.984968000 | 1.593998000  |
| Cl | 2.009832000  | -1.254489000 | 5.057912000  |
| Cl | -5.324976000 | 5.411783000  | -0.789427000 |
| Si | 1.857720000  | -3.453669000 | -2.669537000 |
| C  | 0.411785000  | -4.275100000 | -1.748528000 |
| H  | -0.202990000 | -3.572188000 | -1.175197000 |
| H  | -0.243640000 | -4.735308000 | -2.498006000 |
| H  | 0.740384000  | -5.073068000 | -1.076366000 |
| C  | 1.119009000  | -2.500602000 | -4.134049000 |
| H  | 1.876438000  | -2.149794000 | -4.840843000 |
| H  | 0.468204000  | -3.195263000 | -4.679816000 |
| H  | 0.500406000  | -1.647348000 | -3.836991000 |
| C  | 2.982086000  | -4.818818000 | -3.355094000 |
| H  | 3.801081000  | -4.401095000 | -3.951164000 |
| H  | 3.425932000  | -5.419917000 | -2.553813000 |
| H  | 2.409918000  | -5.494595000 | -4.001766000 |
| C  | 2.306697000  | 4.273588000  | -1.210431000 |
| C  | 3.141067000  | 3.235826000  | -1.605940000 |
| C  | 2.628240000  | 1.936214000  | -1.683033000 |
| C  | 1.280073000  | 1.627489000  | -1.364507000 |
| C  | 0.471670000  | 2.717994000  | -0.956537000 |
| C  | 0.965322000  | 4.012544000  | -0.899461000 |

|    |              |              |              |
|----|--------------|--------------|--------------|
| H  | 4.168055000  | 3.441663000  | -1.892391000 |
| H  | 3.258612000  | 1.173040000  | -2.139982000 |
| H  | -0.580835000 | 2.558548000  | -0.749546000 |
| H  | 0.309036000  | 4.834869000  | -0.629629000 |
| C  | 0.859081000  | 0.222809000  | -1.413647000 |
| C  | -0.603636000 | -0.175507000 | -1.250404000 |
| H  | 1.258583000  | -0.235097000 | -2.326373000 |
| H  | -0.679267000 | -1.240418000 | -1.510095000 |
| H  | -1.225524000 | 0.345835000  | -1.994001000 |
| Cl | 2.914557000  | 5.899413000  | -1.125831000 |

***oC3<sup>a</sup>***,  $E_{(\text{SCF Done})} = -3794.02999$  a.u.

|    |              |              |              |
|----|--------------|--------------|--------------|
| Sc | 0.520609000  | -1.815098000 | -0.040352000 |
| Si | -4.795010000 | 4.297635000  | -1.622300000 |
| C  | -4.222233000 | 2.511669000  | -1.238109000 |
| C  | -3.434599000 | 5.529977000  | -1.130673000 |
| C  | -6.384969000 | 4.690761000  | -0.667594000 |
| C  | -5.113071000 | 4.420112000  | -3.488337000 |
| C  | -1.698260000 | -2.168878000 | -2.819526000 |
| C  | -0.288378000 | -2.273103000 | -2.321969000 |
| C  | 0.322255000  | -3.455226000 | -1.823406000 |
| C  | 1.725371000  | -3.206633000 | -1.609815000 |
| C  | 1.957114000  | -1.844020000 | -2.000275000 |
| C  | 0.718808000  | -1.266559000 | -2.412398000 |
| C  | -0.391816000 | -4.772849000 | -1.698675000 |
| C  | 3.281430000  | -1.140216000 | -2.088561000 |
| C  | 0.524407000  | 0.119110000  | -2.958479000 |
| C  | -3.933023000 | 2.226788000  | 0.238416000  |
| C  | -3.460287000 | 0.793485000  | 0.604704000  |
| H  | -3.332766000 | 2.316895000  | -1.856177000 |
| H  | -5.005998000 | 1.835679000  | -1.606554000 |
| H  | -3.234441000 | 5.505015000  | -0.053179000 |
| H  | -3.733544000 | 6.553431000  | -1.385407000 |
| H  | -2.495150000 | 5.319934000  | -1.656079000 |
| H  | -7.182658000 | 3.979442000  | -0.910982000 |
| H  | -6.746905000 | 5.694479000  | -0.919078000 |
| H  | -6.225865000 | 4.659731000  | 0.416207000  |
| H  | -4.208103000 | 4.195609000  | -4.065185000 |
| H  | -5.439981000 | 5.429472000  | -3.763634000 |
| H  | -5.895170000 | 3.720201000  | -3.804593000 |
| H  | -2.422488000 | -2.634914000 | -2.143635000 |
| H  | -1.792322000 | -2.673485000 | -3.790447000 |
| H  | -2.001149000 | -1.129456000 | -2.969089000 |
| H  | -1.444365000 | -4.646451000 | -1.423871000 |



|   |              |              |              |
|---|--------------|--------------|--------------|
| H | 0.069998000  | -5.434728000 | -0.960608000 |
| H | -0.378511000 | -5.303292000 | -2.659734000 |
| H | 3.809800000  | -1.439940000 | -3.002659000 |
| H | 3.942935000  | -1.365006000 | -1.249072000 |
| H | 3.163167000  | -0.054356000 | -2.140984000 |
| H | 1.229717000  | 0.838437000  | -2.529727000 |
| H | -0.484844000 | 0.495297000  | -2.766975000 |
| H | 0.677106000  | 0.132892000  | -4.045822000 |
| H | -4.830434000 | 2.436148000  | 0.834710000  |
| H | -3.162106000 | 2.922479000  | 0.602784000  |
| H | -3.301345000 | 0.810123000  | 1.688059000  |
| C | 3.131334000  | -1.194011000 | 1.788143000  |
| O | 2.080486000  | -0.651272000 | 0.927545000  |
| C | 2.153967000  | 0.812315000  | 0.904980000  |
| C | 3.070503000  | 1.168664000  | 2.061716000  |
| C | 4.042874000  | -0.013465000 | 2.084106000  |
| H | 2.649020000  | -1.583206000 | 2.690626000  |
| H | 3.617668000  | -2.008394000 | 1.244879000  |
| H | 2.572859000  | 1.111762000  | -0.059447000 |
| H | 1.135301000  | 1.192848000  | 1.008364000  |
| H | 3.569973000  | 2.126665000  | 1.897775000  |
| H | 2.502725000  | 1.222738000  | 2.996861000  |
| H | 4.799019000  | 0.098619000  | 1.300097000  |
| H | 4.554782000  | -0.128673000 | 3.043339000  |
| C | -4.740917000 | -0.802496000 | -0.919820000 |
| C | -4.537375000 | -0.244124000 | 0.351691000  |
| C | -5.418509000 | -0.669227000 | 1.360256000  |
| C | -6.429912000 | -1.600000000 | 1.125793000  |
| C | -6.594701000 | -2.134748000 | -0.147858000 |
| C | -5.747455000 | -1.730290000 | -1.176551000 |
| H | -7.082409000 | -1.894809000 | 1.941345000  |
| H | -5.873403000 | -2.128531000 | -2.179771000 |
| C | -0.576153000 | -2.121290000 | 2.455102000  |
| C | -1.032561000 | -0.916019000 | 1.865551000  |
| C | -0.879133000 | 0.217928000  | 2.712968000  |
| C | -0.389199000 | 0.125879000  | 4.005061000  |
| C | 0.010395000  | -1.105590000 | 4.542159000  |
| C | -0.082143000 | -2.244176000 | 3.754792000  |
| H | -1.208079000 | 1.183750000  | 2.343109000  |
| H | -0.338071000 | 1.022085000  | 4.617846000  |
| H | 0.205000000  | -3.219178000 | 4.136554000  |
| C | -1.456286000 | -0.843088000 | 0.463212000  |
| C | -2.094917000 | 0.446173000  | -0.035706000 |
| H | -2.081575000 | -1.708286000 | 0.200667000  |

|    |              |              |              |
|----|--------------|--------------|--------------|
| H  | -1.424885000 | 1.302934000  | 0.134297000  |
| H  | -2.196518000 | 0.385148000  | -1.124490000 |
| Si | 2.994910000  | -4.579207000 | -1.186895000 |
| C  | 2.668138000  | -5.313154000 | 0.538087000  |
| H  | 2.773099000  | -4.565284000 | 1.334051000  |
| H  | 1.677029000  | -5.768511000 | 0.632769000  |
| H  | 3.406236000  | -6.099742000 | 0.737282000  |
| C  | 4.787288000  | -3.959507000 | -1.196755000 |
| H  | 5.071997000  | -3.512732000 | -2.154167000 |
| H  | 5.013427000  | -3.240366000 | -0.401928000 |
| H  | 5.436654000  | -4.829072000 | -1.036257000 |
| C  | 2.858506000  | -5.941313000 | -2.495418000 |
| H  | 3.022738000  | -5.535756000 | -3.499944000 |
| H  | 3.625119000  | -6.703682000 | -2.312811000 |
| H  | 1.885260000  | -6.440971000 | -2.487390000 |
| C  | 6.618867000  | 5.053537000  | 1.510612000  |
| C  | 6.639556000  | 3.918258000  | 0.705001000  |
| C  | 5.571075000  | 3.667563000  | -0.151854000 |
| C  | 4.460117000  | 4.524610000  | -0.239230000 |
| C  | 4.479622000  | 5.665408000  | 0.582773000  |
| C  | 5.533713000  | 5.927617000  | 1.449249000  |
| H  | 7.478715000  | 3.230515000  | 0.732371000  |
| H  | 3.658721000  | 6.372597000  | 0.504350000  |
| H  | 5.518779000  | 6.824737000  | 2.061422000  |
| C  | 3.345489000  | 4.270200000  | -1.164832000 |
| C  | 2.077535000  | 4.656763000  | -0.974136000 |
| H  | 3.598145000  | 3.734897000  | -2.078256000 |
| H  | 1.318869000  | 4.476998000  | -1.730628000 |
| H  | 1.754083000  | 5.175560000  | -0.074559000 |
| Cl | 5.638138000  | 2.207792000  | -1.126574000 |
| Cl | -0.657039000 | -3.614507000 | 1.475282000  |
| H  | -7.385403000 | -2.856697000 | -0.331376000 |
| H  | 0.373499000  | -1.177744000 | 5.562617000  |
| H  | 7.455334000  | 5.257213000  | 2.172974000  |
| H  | -4.096212000 | -0.490188000 | -1.735600000 |
| Cl | -5.297108000 | -0.031087000 | 2.990360000  |

***o*TS3<sup>a</sup><sub>syn</sub>,  $E_{(\text{SCF Done})} = -3794.04616$  a.u. IF =  $i248.1$  cm<sup>-1</sup>**

|    |              |              |              |
|----|--------------|--------------|--------------|
| Sc | 1.499031000  | -0.064224000 | -0.419793000 |
| Si | -6.980111000 | 1.645377000  | -1.216278000 |
| C  | -5.373176000 | 0.607274000  | -1.090904000 |
| C  | -6.614620000 | 3.454004000  | -0.767626000 |
| C  | -8.289162000 | 0.943218000  | -0.037947000 |
| C  | -7.597314000 | 1.544460000  | -3.006098000 |

|   |              |              |              |
|---|--------------|--------------|--------------|
| C | -0.652867000 | -1.543327000 | -2.957457000 |
| C | 0.689121000  | -1.519188000 | -2.292480000 |
| C | 1.112642000  | -2.367870000 | -1.235175000 |
| C | 2.538273000  | -2.228409000 | -1.067375000 |
| C | 2.964286000  | -1.259884000 | -2.041688000 |
| C | 1.830038000  | -0.821900000 | -2.781952000 |
| C | 0.219770000  | -3.370717000 | -0.557327000 |
| C | 4.368100000  | -0.878386000 | -2.419420000 |
| C | 1.862512000  | 0.014856000  | -4.027017000 |
| C | -4.738802000 | 0.577711000  | 0.301750000  |
| C | -3.370782000 | -0.143017000 | 0.474335000  |
| H | -4.668022000 | 1.006897000  | -1.835490000 |
| H | -5.627242000 | -0.409592000 | -1.417260000 |
| H | -6.274224000 | 3.557151000  | 0.269242000  |
| H | -7.518773000 | 4.064209000  | -0.876275000 |
| H | -5.846896000 | 3.883324000  | -1.422383000 |
| H | -8.501828000 | -0.108763000 | -0.261041000 |
| H | -9.229378000 | 1.498810000  | -0.132295000 |
| H | -7.972376000 | 1.007609000  | 1.009302000  |
| H | -6.857436000 | 1.945341000  | -3.708780000 |
| H | -8.521288000 | 2.120276000  | -3.133192000 |
| H | -7.810241000 | 0.508971000  | -3.296011000 |
| H | -1.432075000 | -1.929336000 | -2.296587000 |
| H | -0.616462000 | -2.207641000 | -3.832117000 |
| H | -0.966399000 | -0.561242000 | -3.329262000 |
| H | -0.771288000 | -2.968332000 | -0.322925000 |
| H | 0.648742000  | -3.743753000 | 0.375316000  |
| H | 0.057392000  | -4.235929000 | -1.212934000 |
| H | 4.649130000  | -1.376439000 | -3.357278000 |
| H | 5.098455000  | -1.176175000 | -1.668951000 |
| H | 4.473478000  | 0.197855000  | -2.588777000 |
| H | 2.727106000  | 0.684267000  | -4.058145000 |
| H | 0.960710000  | 0.624291000  | -4.151659000 |
| H | 1.928865000  | -0.634195000 | -4.910905000 |
| H | -5.439056000 | 0.120584000  | 1.012367000  |
| H | -4.586026000 | 1.608131000  | 0.655616000  |
| H | -3.091105000 | 0.050903000  | 1.513987000  |
| C | 3.138326000  | 1.692413000  | 1.846920000  |
| O | 3.204253000  | 0.666842000  | 0.809121000  |
| C | 4.568549000  | 0.138179000  | 0.805517000  |
| C | 5.230460000  | 0.629325000  | 2.098531000  |
| C | 4.059336000  | 1.167433000  | 2.927281000  |
| H | 3.498978000  | 2.633680000  | 1.422859000  |
| H | 2.094680000  | 1.801780000  | 2.139423000  |

|    |              |              |              |
|----|--------------|--------------|--------------|
| H  | 4.476986000  | -0.946052000 | 0.757364000  |
| H  | 5.069809000  | 0.507219000  | -0.091071000 |
| H  | 5.775001000  | -0.172170000 | 2.604729000  |
| H  | 5.942468000  | 1.431555000  | 1.880967000  |
| H  | 3.571546000  | 0.365715000  | 3.492497000  |
| H  | 4.360371000  | 1.951817000  | 3.627200000  |
| C  | -3.689723000 | -2.241322000 | -0.932866000 |
| C  | -3.486365000 | -1.648619000 | 0.324935000  |
| C  | -3.463229000 | -2.525817000 | 1.422869000  |
| C  | -3.626853000 | -3.904374000 | 1.280990000  |
| C  | -3.827184000 | -4.451141000 | 0.017709000  |
| C  | -3.860282000 | -3.613727000 | -1.095111000 |
| H  | -3.604179000 | -4.536665000 | 2.162807000  |
| H  | -4.027319000 | -4.024566000 | -2.087002000 |
| C  | 0.065278000  | 0.236727000  | 2.531398000  |
| C  | -0.688032000 | 0.879978000  | 1.533065000  |
| C  | -1.338894000 | 2.061103000  | 1.954104000  |
| C  | -1.250445000 | 2.536745000  | 3.256573000  |
| C  | -0.508771000 | 1.843429000  | 4.214028000  |
| C  | 0.155211000  | 0.676585000  | 3.847324000  |
| H  | -1.958339000 | 2.598904000  | 1.242287000  |
| H  | -1.780660000 | 3.444016000  | 3.531649000  |
| H  | 0.730776000  | 0.108494000  | 4.571217000  |
| C  | -0.845176000 | 0.350278000  | 0.151414000  |
| C  | -2.266844000 | 0.490872000  | -0.410003000 |
| H  | -0.604771000 | -0.731189000 | 0.124186000  |
| H  | -2.514777000 | 1.553425000  | -0.534831000 |
| H  | -2.293447000 | 0.069615000  | -1.418889000 |
| Si | 3.596550000  | -3.585734000 | -0.206539000 |
| C  | 3.332235000  | -3.692606000 | 1.672417000  |
| H  | 3.625431000  | -2.774580000 | 2.194254000  |
| H  | 2.299921000  | -3.927781000 | 1.951955000  |
| H  | 3.961055000  | -4.502522000 | 2.062416000  |
| C  | 5.465643000  | -3.405315000 | -0.494797000 |
| H  | 5.721036000  | -3.417968000 | -1.559004000 |
| H  | 5.925911000  | -2.522288000 | -0.039407000 |
| H  | 5.939934000  | -4.283081000 | -0.037896000 |
| C  | 3.112560000  | -5.236939000 | -1.002505000 |
| H  | 3.249144000  | -5.199042000 | -2.089127000 |
| H  | 3.758689000  | -6.032685000 | -0.613000000 |
| H  | 2.076345000  | -5.522805000 | -0.801343000 |
| C  | 3.131113000  | 5.565954000  | 0.475759000  |
| C  | 3.811583000  | 4.888195000  | -0.532002000 |
| C  | 3.238375000  | 3.765577000  | -1.124701000 |

|    |               |               |               |
|----|---------------|---------------|---------------|
| C  | 1. 973402000  | 3. 267624000  | -0. 747109000 |
| C  | 1. 319127000  | 3. 985516000  | 0. 273965000  |
| C  | 1. 874965000  | 5. 109232000  | 0. 872714000  |
| H  | 4. 783358000  | 5. 230362000  | -0. 873713000 |
| H  | 0. 347740000  | 3. 643582000  | 0. 617290000  |
| H  | 1. 324507000  | 5. 629113000  | 1. 651997000  |
| C  | 1. 360889000  | 2. 110023000  | -1. 416943000 |
| C  | -0. 003620000 | 1. 793735000  | -1. 314974000 |
| H  | 1. 871174000  | 1. 775792000  | -2. 315729000 |
| H  | -0. 468102000 | 1. 261673000  | -2. 140423000 |
| H  | -0. 669759000 | 2. 487527000  | -0. 812734000 |
| Cl | 4. 157086000  | 2. 997193000  | -2. 405484000 |
| Cl | 0. 960458000  | -1. 225561000 | 2. 099758000  |
| H  | -3. 962938000 | -5. 523492000 | -0. 090453000 |
| H  | -0. 453800000 | 2. 197868000  | 5. 238740000  |
| H  | 3. 576405000  | 6. 443722000  | 0. 934491000  |
| H  | -3. 733218000 | -1. 600656000 | -1. 808617000 |
| Cl | -3. 237865000 | -1. 926567000 | 3. 056475000  |

***oP3***<sub>syn</sub>,  $E_{(\text{SCF Done})} = -3794.082503$  a.u.

|    |               |               |               |
|----|---------------|---------------|---------------|
| Sc | 2. 346562000  | 0. 043424000  | -0. 678205000 |
| Si | -7. 814783000 | 0. 604175000  | -1. 116199000 |
| C  | -5. 954028000 | 0. 162512000  | -1. 030220000 |
| C  | -8. 061203000 | 2. 457594000  | -0. 784355000 |
| C  | -8. 773708000 | -0. 409300000 | 0. 168947000  |
| C  | -8. 433957000 | 0. 181644000  | -2. 859019000 |
| C  | -0. 016579000 | -1. 627665000 | -2. 816923000 |
| C  | 1. 303694000  | -1. 702260000 | -2. 111088000 |
| C  | 1. 550623000  | -2. 291669000 | -0. 841345000 |
| C  | 2. 975055000  | -2. 343079000 | -0. 616171000 |
| C  | 3. 587501000  | -1. 777347000 | -1. 785889000 |
| C  | 2. 562036000  | -1. 383944000 | -2. 695586000 |
| C  | 0. 486880000  | -2. 951727000 | -0. 009981000 |
| C  | 5. 052946000  | -1. 725833000 | -2. 120796000 |
| C  | 2. 752067000  | -0. 904615000 | -4. 105408000 |
| C  | -5. 278060000 | 0. 461607000  | 0. 310142000  |
| C  | -3. 768443000 | 0. 109245000  | 0. 433363000  |
| H  | -5. 451019000 | 0. 700236000  | -1. 847641000 |
| H  | -5. 871032000 | -0. 907179000 | -1. 267069000 |
| H  | -7. 734420000 | 2. 736401000  | 0. 224146000  |
| H  | -9. 120910000 | 2. 724396000  | -0. 871026000 |
| H  | -7. 505766000 | 3. 072028000  | -1. 502843000 |
| H  | -8. 622212000 | -1. 484785000 | 0. 019917000  |
| H  | -9. 849103000 | -0. 211539000 | 0. 090782000  |

|   |              |              |              |
|---|--------------|--------------|--------------|
| H | -8.467282000 | -0.165340000 | 1.192582000  |
| H | -7.895995000 | 0.753218000  | -3.624457000 |
| H | -9.500659000 | 0.412606000  | -2.961142000 |
| H | -8.303215000 | -0.883897000 | -3.081090000 |
| H | -0.857753000 | -1.586530000 | -2.119758000 |
| H | -0.160340000 | -2.521732000 | -3.439613000 |
| H | -0.080244000 | -0.762164000 | -3.483944000 |
| H | -0.456323000 | -2.397758000 | -0.008395000 |
| H | 0.789856000  | -3.088409000 | 1.030766000  |
| H | 0.265541000  | -3.946583000 | -0.417192000 |
| H | 5.327092000  | -2.578554000 | -2.756256000 |
| H | 5.685738000  | -1.772889000 | -1.234342000 |
| H | 5.323923000  | -0.823493000 | -2.680842000 |
| H | 3.761498000  | -0.525899000 | -4.286911000 |
| H | 2.045738000  | -0.114410000 | -4.381105000 |
| H | 2.592080000  | -1.735803000 | -4.805306000 |
| H | -5.805017000 | -0.064209000 | 1.116650000  |
| H | -5.372744000 | 1.533131000  | 0.538005000  |
| H | -3.473090000 | 0.463756000  | 1.426961000  |
| C | 3.642192000  | 1.876665000  | 1.732401000  |
| O | 3.856653000  | 0.805593000  | 0.752635000  |
| C | 5.282143000  | 0.480505000  | 0.693709000  |
| C | 5.978681000  | 1.550326000  | 1.520507000  |
| C | 4.914535000  | 1.906858000  | 2.559256000  |
| H | 3.483124000  | 2.807471000  | 1.181585000  |
| H | 2.745497000  | 1.625807000  | 2.297479000  |
| H | 5.403605000  | -0.517968000 | 1.121489000  |
| H | 5.581193000  | 0.470927000  | -0.355711000 |
| H | 6.907528000  | 1.179642000  | 1.962514000  |
| H | 6.218057000  | 2.421404000  | 0.900854000  |
| H | 4.879814000  | 1.154668000  | 3.355609000  |
| H | 5.075123000  | 2.886012000  | 3.018673000  |
| C | -3.501628000 | -2.118166000 | -0.785373000 |
| C | -3.549190000 | -1.393691000 | 0.417137000  |
| C | -3.460274000 | -2.152847000 | 1.596638000  |
| C | -3.331137000 | -3.541672000 | 1.584827000  |
| C | -3.293657000 | -4.222567000 | 0.371914000  |
| C | -3.380050000 | -3.505538000 | -0.818978000 |
| H | -3.271076000 | -4.078581000 | 2.526128000  |
| H | -3.363890000 | -4.023235000 | -1.774243000 |
| C | -0.164408000 | 1.232531000  | 1.975090000  |
| C | -1.145354000 | 1.646905000  | 1.071055000  |
| C | -1.878211000 | 2.778437000  | 1.470106000  |
| C | -1.654533000 | 3.426190000  | 2.681104000  |

|    |              |              |              |
|----|--------------|--------------|--------------|
| C  | -0.679414000 | 2.955807000  | 3.558306000  |
| C  | 0.076238000  | 1.843170000  | 3.203257000  |
| H  | -2.656125000 | 3.154851000  | 0.812230000  |
| H  | -2.255285000 | 4.291483000  | 2.946277000  |
| H  | 0.823861000  | 1.439514000  | 3.879054000  |
| C  | -1.407946000 | 0.957964000  | -0.253909000 |
| C  | -2.911334000 | 0.873851000  | -0.589734000 |
| H  | -1.036594000 | -0.070980000 | -0.173399000 |
| H  | -3.322948000 | 1.885773000  | -0.703454000 |
| H  | -3.002759000 | 0.425444000  | -1.585621000 |
| Si | 3.765534000  | -3.407735000 | 0.770195000  |
| C  | 3.375852000  | -2.722286000 | 2.499806000  |
| H  | 3.726287000  | -1.690495000 | 2.617488000  |
| H  | 2.306787000  | -2.740957000 | 2.736520000  |
| H  | 3.886069000  | -3.333465000 | 3.254181000  |
| C  | 5.652790000  | -3.565267000 | 0.630152000  |
| H  | 5.962501000  | -3.982658000 | -0.333210000 |
| H  | 6.207315000  | -2.635857000 | 0.796853000  |
| H  | 5.974041000  | -4.271081000 | 1.406435000  |
| C  | 3.083990000  | -5.169127000 | 0.610372000  |
| H  | 3.269940000  | -5.569158000 | -0.392766000 |
| H  | 3.591263000  | -5.823151000 | 1.329643000  |
| H  | 2.009845000  | -5.230743000 | 0.805513000  |
| C  | 3.084143000  | 5.221437000  | -0.493916000 |
| C  | 3.687355000  | 4.197390000  | -1.220147000 |
| C  | 2.953733000  | 3.047593000  | -1.480623000 |
| C  | 1.612551000  | 2.830155000  | -1.100765000 |
| C  | 1.062593000  | 3.889703000  | -0.342531000 |
| C  | 1.772202000  | 5.049106000  | -0.049543000 |
| H  | 4.706885000  | 4.288021000  | -1.582317000 |
| H  | 0.041105000  | 3.800952000  | 0.008389000  |
| H  | 1.287258000  | 5.835452000  | 0.522640000  |
| C  | 0.885581000  | 1.587771000  | -1.471615000 |
| C  | -0.649886000 | 1.626894000  | -1.430328000 |
| H  | 1.175835000  | 1.349827000  | -2.508677000 |
| H  | -1.009345000 | 1.119625000  | -2.332845000 |
| H  | -1.012533000 | 2.662311000  | -1.526621000 |
| Cl | 3.777532000  | 1.729198000  | -2.347089000 |
| Cl | 0.827193000  | -0.201382000 | 1.615468000  |
| H  | -3.205983000 | -5.305429000 | 0.363407000  |
| H  | -0.511769000 | 3.439130000  | 4.516153000  |
| H  | 3.632008000  | 6.134663000  | -0.282910000 |
| H  | -3.582954000 | -1.578961000 | -1.724678000 |
| Cl | -3.523775000 | -1.381417000 | 3.170954000  |

***oC3***<sup>iso</sup>,  $E_{(\text{SCF Done})} = -3794.045165$  a.u.

|    |              |              |              |
|----|--------------|--------------|--------------|
| Sc | 0.741721000  | -1.752979000 | -0.001805000 |
| Si | -4.636555000 | 4.416425000  | -0.928109000 |
| C  | -4.043745000 | 2.595883000  | -0.941486000 |
| C  | -3.457002000 | 5.465707000  | 0.130006000  |
| C  | -6.393342000 | 4.519366000  | -0.222852000 |
| C  | -4.614554000 | 5.050556000  | -2.715839000 |
| C  | -0.873865000 | -1.084580000 | -3.131603000 |
| C  | 0.351259000  | -1.584787000 | -2.428391000 |
| C  | 0.637312000  | -2.944034000 | -2.126025000 |
| C  | 1.984880000  | -3.036578000 | -1.627721000 |
| C  | 2.518636000  | -1.700404000 | -1.650614000 |
| C  | 1.512243000  | -0.812161000 | -2.123765000 |
| C  | -0.322302000 | -4.064140000 | -2.415537000 |
| C  | 3.930547000  | -1.296201000 | -1.329390000 |
| C  | 1.660094000  | 0.658395000  | -2.392702000 |
| C  | -4.004878000 | 1.921099000  | 0.432443000  |
| C  | -3.480004000 | 0.460866000  | 0.496979000  |
| H  | -3.048740000 | 2.579524000  | -1.411268000 |
| H  | -4.711806000 | 2.043180000  | -1.615775000 |
| H  | -3.457342000 | 5.144603000  | 1.178093000  |
| H  | -3.757399000 | 6.519767000  | 0.110063000  |
| H  | -2.427125000 | 5.407850000  | -0.242635000 |
| H  | -7.091285000 | 3.907172000  | -0.805624000 |
| H  | -6.758714000 | 5.552548000  | -0.245384000 |
| H  | -6.434036000 | 4.176458000  | 0.817318000  |
| H  | -3.607541000 | 4.996176000  | -3.146154000 |
| H  | -4.941637000 | 6.095573000  | -2.765166000 |
| H  | -5.284594000 | 4.462932000  | -3.354051000 |
| H  | -1.794975000 | -1.527249000 | -2.740706000 |
| H  | -0.823120000 | -1.334226000 | -4.200148000 |
| H  | -0.966427000 | 0.002867000  | -3.061201000 |
| H  | -1.363476000 | -3.742469000 | -2.309653000 |
| H  | -0.173165000 | -4.931231000 | -1.770357000 |
| H  | -0.200891000 | -4.409616000 | -3.451064000 |
| H  | 4.548558000  | -1.316941000 | -2.236262000 |
| H  | 4.402018000  | -1.967165000 | -0.606015000 |
| H  | 3.995437000  | -0.280055000 | -0.928251000 |
| H  | 2.549787000  | 1.079773000  | -1.917176000 |
| H  | 0.792210000  | 1.236678000  | -2.054559000 |
| H  | 1.760375000  | 0.839635000  | -3.471003000 |
| H  | -5.010164000 | 1.928503000  | 0.872540000  |
| H  | -3.375824000 | 2.514131000  | 1.113577000  |



|    |              |              |              |
|----|--------------|--------------|--------------|
| H  | -3.505032000 | 0.193880000  | 1.558723000  |
| C  | 2.857263000  | -1.120073000 | 2.401082000  |
| O  | 2.022168000  | -0.594758000 | 1.318676000  |
| C  | 1.988647000  | 0.869156000  | 1.378617000  |
| C  | 2.564780000  | 1.215222000  | 2.739699000  |
| C  | 3.584621000  | 0.094269000  | 2.955673000  |
| H  | 2.189743000  | -1.577281000 | 3.138086000  |
| H  | 3.514624000  | -1.878407000 | 1.970630000  |
| H  | 2.607052000  | 1.247530000  | 0.559992000  |
| H  | 0.951269000  | 1.184275000  | 1.239743000  |
| H  | 3.014137000  | 2.212033000  | 2.743034000  |
| H  | 1.783153000  | 1.178844000  | 3.506159000  |
| H  | 4.499239000  | 0.292459000  | 2.386779000  |
| H  | 3.855145000  | -0.042275000 | 4.006182000  |
| C  | -4.379666000 | -0.660728000 | -1.607190000 |
| C  | -4.399244000 | -0.516965000 | -0.210498000 |
| C  | -5.341887000 | -1.299591000 | 0.477213000  |
| C  | -6.202315000 | -2.179931000 | -0.178520000 |
| C  | -6.146748000 | -2.298147000 | -1.563387000 |
| C  | -5.232643000 | -1.530757000 | -2.281495000 |
| H  | -3.681708000 | -0.059927000 | -2.182409000 |
| H  | -6.911376000 | -2.762327000 | 0.401002000  |
| H  | -5.187939000 | -1.601455000 | -3.364957000 |
| C  | -0.651881000 | -2.556822000 | 2.254955000  |
| C  | -1.112671000 | -1.291998000 | 1.813292000  |
| C  | -1.184238000 | -0.326780000 | 2.857027000  |
| C  | -0.893404000 | -0.626627000 | 4.177675000  |
| C  | -0.481882000 | -1.912072000 | 4.554525000  |
| C  | -0.355604000 | -2.889176000 | 3.577762000  |
| H  | -1.532435000 | 0.670862000  | 2.610139000  |
| H  | -1.010926000 | 0.144370000  | 4.934649000  |
| H  | -0.047522000 | -3.899834000 | 3.827563000  |
| C  | -1.337507000 | -0.982031000 | 0.394023000  |
| C  | -2.002577000 | 0.344114000  | 0.048560000  |
| H  | -1.857749000 | -1.813271000 | -0.105488000 |
| H  | -1.452213000 | 1.183781000  | 0.500154000  |
| H  | -1.921010000 | 0.504128000  | -1.031060000 |
| Si | 3.037013000  | -4.598114000 | -1.266189000 |
| C  | 2.081419000  | -6.217820000 | -1.489153000 |
| H  | 1.279824000  | -6.353546000 | -0.754899000 |
| H  | 1.656853000  | -6.324557000 | -2.492069000 |
| H  | 2.791723000  | -7.041535000 | -1.345588000 |
| C  | 3.674020000  | -4.586417000 | 0.528857000  |
| H  | 4.370348000  | -3.766813000 | 0.736793000  |

|    |              |              |              |
|----|--------------|--------------|--------------|
| H  | 2.848341000  | -4.537490000 | 1.250068000  |
| H  | 4.214097000  | -5.520829000 | 0.724115000  |
| C  | 4.499151000  | -4.609879000 | -2.469307000 |
| H  | 5.167979000  | -3.754875000 | -2.331260000 |
| H  | 5.090329000  | -5.522203000 | -2.326660000 |
| H  | 4.146560000  | -4.599323000 | -3.506689000 |
| C  | 3.857733000  | 5.149754000  | -2.403519000 |
| C  | 4.584536000  | 4.074623000  | -1.899165000 |
| C  | 4.766030000  | 3.955743000  | -0.523663000 |
| C  | 4.246495000  | 4.891291000  | 0.387418000  |
| C  | 3.525963000  | 5.967505000  | -0.160172000 |
| C  | 3.324328000  | 6.096222000  | -1.528854000 |
| H  | 5.019000000  | 3.334789000  | -2.564023000 |
| H  | 3.150375000  | 6.732702000  | 0.513185000  |
| H  | 2.771374000  | 6.947659000  | -1.915081000 |
| C  | 4.469578000  | 4.780947000  | 1.836978000  |
| C  | 3.648623000  | 5.252645000  | 2.784276000  |
| H  | 5.387845000  | 4.282354000  | 2.141137000  |
| H  | 3.907043000  | 5.174662000  | 3.836435000  |
| H  | 2.704262000  | 5.738791000  | 2.550120000  |
| H  | 3.724164000  | 5.252204000  | -3.476710000 |
| H  | -6.820041000 | -2.981219000 | -2.073486000 |
| H  | -0.275162000 | -2.150687000 | 5.593105000  |
| Cl | 5.664827000  | 2.561655000  | 0.056897000  |
| Cl | -5.494694000 | -1.202949000 | 2.222471000  |
| Cl | -0.450051000 | -3.850448000 | 1.035622000  |

***o*TS3<sup>a</sup><sub>iso</sub>,  $E_{(\text{SCF Done})} = -3794.026618$  a.u.  $\text{IF} = i268.2 \text{ cm}^{-1}$**

|    |              |              |              |
|----|--------------|--------------|--------------|
| Sc | 1.691094000  | 0.123957000  | 0.066222000  |
| Si | -6.778919000 | 1.540055000  | 0.284705000  |
| C  | -5.097590000 | 0.816091000  | -0.286599000 |
| C  | -6.601411000 | 2.291138000  | 2.019905000  |
| C  | -8.090502000 | 0.171569000  | 0.312564000  |
| C  | -7.274029000 | 2.892517000  | -0.948580000 |
| C  | -0.023099000 | 0.685132000  | -3.010074000 |
| C  | 1.237807000  | 0.199267000  | -2.359886000 |
| C  | 1.558484000  | -1.146213000 | -2.025012000 |
| C  | 2.933397000  | -1.198822000 | -1.592512000 |
| C  | 3.441251000  | 0.141587000  | -1.699264000 |
| C  | 2.404884000  | 0.997495000  | -2.162133000 |
| C  | 0.637296000  | -2.311955000 | -2.255308000 |
| C  | 4.877858000  | 0.573158000  | -1.611959000 |
| C  | 2.591593000  | 2.399221000  | -2.656403000 |
| C  | -4.535873000 | -0.288260000 | 0.611339000  |

|   |              |              |              |
|---|--------------|--------------|--------------|
| C | -3.127042000 | -0.859657000 | 0.277909000  |
| H | -4.390788000 | 1.656527000  | -0.364024000 |
| H | -5.245435000 | 0.440775000  | -1.307720000 |
| H | -6.345594000 | 1.531467000  | 2.767640000  |
| H | -7.545192000 | 2.752335000  | 2.333298000  |
| H | -5.829466000 | 3.069463000  | 2.047253000  |
| H | -8.202368000 | -0.295471000 | -0.672783000 |
| H | -9.066624000 | 0.580338000  | 0.598410000  |
| H | -7.840156000 | -0.616229000 | 1.032147000  |
| H | -6.528240000 | 3.695362000  | -0.982929000 |
| H | -8.233089000 | 3.343183000  | -0.668462000 |
| H | -7.381228000 | 2.488192000  | -1.961778000 |
| H | -0.875692000 | 0.036603000  | -2.796833000 |
| H | 0.101726000  | 0.697448000  | -4.101828000 |
| H | -0.276933000 | 1.705683000  | -2.707332000 |
| H | -0.413810000 | -2.010837000 | -2.265999000 |
| H | 0.750630000  | -3.099178000 | -1.507968000 |
| H | 0.845022000  | -2.762291000 | -3.235068000 |
| H | 5.327231000  | 0.549714000  | -2.613766000 |
| H | 5.479455000  | -0.079187000 | -0.975901000 |
| H | 4.985582000  | 1.601019000  | -1.251953000 |
| H | 3.317636000  | 2.961682000  | -2.063423000 |
| H | 1.657930000  | 2.965068000  | -2.666157000 |
| H | 2.969562000  | 2.370816000  | -3.688123000 |
| H | -5.233692000 | -1.135123000 | 0.629799000  |
| H | -4.483665000 | 0.076180000  | 1.648057000  |
| H | -2.919474000 | -1.564007000 | 1.088094000  |
| C | 3.139334000  | -0.284111000 | 3.075110000  |
| O | 3.235820000  | 0.254031000  | 1.714099000  |
| C | 4.413378000  | 1.112557000  | 1.647378000  |
| C | 4.552879000  | 1.664069000  | 3.050812000  |
| C | 4.205046000  | 0.439399000  | 3.900880000  |
| H | 2.123334000  | -0.090122000 | 3.427692000  |
| H | 3.299706000  | -1.362293000 | 3.026193000  |
| H | 5.270821000  | 0.495310000  | 1.361194000  |
| H | 4.231813000  | 1.867060000  | 0.880921000  |
| H | 5.559095000  | 2.045445000  | 3.244767000  |
| H | 3.839819000  | 2.480014000  | 3.213811000  |
| H | 5.086051000  | -0.198010000 | 4.027914000  |
| H | 3.835428000  | 0.702369000  | 4.895458000  |
| C | -3.209017000 | -1.034242000 | -2.261540000 |
| C | -3.128897000 | -1.663428000 | -1.008119000 |
| C | -3.125291000 | -3.068965000 | -1.022393000 |
| C | -3.190611000 | -3.803243000 | -2.207019000 |

|    |              |              |              |
|----|--------------|--------------|--------------|
| C  | -3.269474000 | -3.141774000 | -3.428158000 |
| C  | -3.280452000 | -1.749058000 | -3.454689000 |
| H  | -3.230993000 | 0.051085000  | -2.298495000 |
| H  | -3.185700000 | -4.887551000 | -2.161816000 |
| H  | -3.351771000 | -1.218082000 | -4.399901000 |
| C  | 0.233583000  | -2.006698000 | 2.443376000  |
| C  | -0.664096000 | -0.974563000 | 2.132859000  |
| C  | -1.548676000 | -0.627677000 | 3.173608000  |
| C  | -1.549993000 | -1.293399000 | 4.396527000  |
| C  | -0.665530000 | -2.343861000 | 4.632620000  |
| C  | 0.244402000  | -2.706951000 | 3.640809000  |
| H  | -2.268806000 | 0.167590000  | 3.007941000  |
| H  | -2.258132000 | -0.996021000 | 5.164544000  |
| H  | 0.950753000  | -3.516370000 | 3.796626000  |
| C  | -0.657394000 | -0.269381000 | 0.825406000  |
| C  | -2.025839000 | 0.234284000  | 0.349444000  |
| H  | -0.288151000 | -0.959570000 | 0.035285000  |
| H  | -2.392056000 | 1.017565000  | 1.026296000  |
| H  | -1.901642000 | 0.722727000  | -0.623030000 |
| Si | 4.068534000  | -2.735766000 | -1.405138000 |
| C  | 3.128222000  | -4.381350000 | -1.423904000 |
| H  | 2.431726000  | -4.512133000 | -0.589713000 |
| H  | 2.578838000  | -4.532407000 | -2.358052000 |
| H  | 3.874251000  | -5.182739000 | -1.351895000 |
| C  | 5.090530000  | -2.687434000 | 0.199263000  |
| H  | 5.790951000  | -1.846847000 | 0.238838000  |
| H  | 4.454789000  | -2.646974000 | 1.090580000  |
| H  | 5.686780000  | -3.605816000 | 0.263098000  |
| C  | 5.239266000  | -2.748422000 | -2.896702000 |
| H  | 5.901560000  | -1.877808000 | -2.926691000 |
| H  | 5.869869000  | -3.644948000 | -2.864029000 |
| H  | 4.672628000  | -2.773626000 | -3.834310000 |
| C  | 0.103079000  | 5.783703000  | -1.639427000 |
| C  | 1.365808000  | 5.717358000  | -1.057593000 |
| C  | 1.720873000  | 4.605752000  | -0.299533000 |
| C  | 0.847797000  | 3.521378000  | -0.086134000 |
| C  | -0.421793000 | 3.630940000  | -0.684737000 |
| C  | -0.793282000 | 4.733847000  | -1.445679000 |
| H  | 2.078437000  | 6.526394000  | -1.182177000 |
| H  | -1.135434000 | 2.824418000  | -0.543109000 |
| H  | -1.785697000 | 4.773701000  | -1.886240000 |
| C  | 1.214568000  | 2.381558000  | 0.765857000  |
| C  | 0.256904000  | 1.646263000  | 1.490995000  |
| H  | 2.195402000  | 2.453822000  | 1.228433000  |

|    |              |              |              |
|----|--------------|--------------|--------------|
| H  | 0.572540000  | 1.189628000  | 2.427676000  |
| H  | -0.770919000 | 1.991778000  | 1.516482000  |
| H  | -0.174896000 | 6.650628000  | -2.231137000 |
| H  | -3.327800000 | -3.714725000 | -4.349199000 |
| H  | -0.675132000 | -2.877785000 | 5.577847000  |
| Cl | 3.326672000  | 4.611936000  | 0.415009000  |
| Cl | -3.047269000 | -3.989986000 | 0.468142000  |
| Cl | 1.450889000  | -2.425686000 | 1.227337000  |

***oP3***<sub>iso</sub>,  $E_{(\text{SCF Done})} = -3024.957533$  a.u.

|    |              |              |              |
|----|--------------|--------------|--------------|
| Sc | 2.471594000  | 0.325821000  | -0.058607000 |
| Si | -7.650067000 | 1.327757000  | -0.410709000 |
| C  | -5.806726000 | 0.861010000  | -0.639782000 |
| C  | -7.835683000 | 2.510720000  | 1.063230000  |
| C  | -8.673208000 | -0.240768000 | -0.110455000 |
| C  | -8.235689000 | 2.188862000  | -1.996473000 |
| C  | 1.788633000  | 1.443687000  | -3.393941000 |
| C  | 2.435312000  | 0.398307000  | -2.536691000 |
| C  | 1.855515000  | -0.832595000 | -2.128254000 |
| C  | 2.865640000  | -1.638331000 | -1.484009000 |
| C  | 4.072743000  | -0.858798000 | -1.509424000 |
| C  | 3.808958000  | 0.383909000  | -2.148853000 |
| C  | 0.447204000  | -1.230583000 | -2.464479000 |
| C  | 5.452681000  | -1.300911000 | -1.107020000 |
| C  | 4.841902000  | 1.394858000  | -2.550786000 |
| C  | -5.148475000 | 0.220512000  | 0.584786000  |
| C  | -3.650140000 | -0.172431000 | 0.450949000  |
| H  | -5.271099000 | 1.776406000  | -0.931608000 |
| H  | -5.750588000 | 0.182105000  | -1.502013000 |
| H  | -7.523372000 | 2.040621000  | 2.003033000  |
| H  | -8.881406000 | 2.817595000  | 1.181224000  |
| H  | -7.238205000 | 3.419685000  | 0.924465000  |
| H  | -8.564014000 | -0.948876000 | -0.940058000 |
| H  | -9.738042000 | 0.002835000  | -0.018801000 |
| H  | -8.371055000 | -0.752661000 | 0.810330000  |
| H  | -7.659299000 | 3.101155000  | -2.189909000 |
| H  | -9.291592000 | 2.473085000  | -1.920723000 |
| H  | -8.130020000 | 1.533116000  | -2.868576000 |
| H  | 0.712313000  | 1.520285000  | -3.216418000 |
| H  | 1.924169000  | 1.194662000  | -4.455434000 |
| H  | 2.219962000  | 2.434781000  | -3.232921000 |
| H  | -0.208851000 | -0.359209000 | -2.546626000 |
| H  | 0.005192000  | -1.909951000 | -1.734762000 |
| H  | 0.416767000  | -1.738533000 | -3.437876000 |

|   |               |               |               |
|---|---------------|---------------|---------------|
| H | 6. 054354000  | -1. 525351000 | -1. 997567000 |
| H | 5. 436613000  | -2. 206417000 | -0. 495993000 |
| H | 5. 998232000  | -0. 525861000 | -0. 554342000 |
| H | 5. 698412000  | 1. 407603000  | -1. 870350000 |
| H | 4. 436871000  | 2. 409670000  | -2. 599298000 |
| H | 5. 227100000  | 1. 152260000  | -3. 550665000 |
| H | -5. 701255000 | -0. 682129000 | 0. 874762000  |
| H | -5. 221971000 | 0. 906517000  | 1. 440761000  |
| H | -3. 356070000 | -0. 524442000 | 1. 446377000  |
| C | 3. 166005000  | 0. 831583000  | 3. 148002000  |
| O | 3. 434310000  | 0. 004098000  | 1. 963863000  |
| C | 4. 314463000  | -1. 100303000 | 2. 337938000  |
| C | 4. 899947000  | -0. 703843000 | 3. 681620000  |
| C | 3. 736554000  | 0. 053818000  | 4. 322332000  |
| H | 3. 673604000  | 1. 788224000  | 3. 002723000  |
| H | 2. 088231000  | 0. 994324000  | 3. 208711000  |
| H | 3. 706199000  | -2. 006579000 | 2. 406374000  |
| H | 5. 054940000  | -1. 217207000 | 1. 546271000  |
| H | 5. 218527000  | -1. 575126000 | 4. 260408000  |
| H | 5. 766137000  | -0. 045888000 | 3. 548241000  |
| H | 2. 994376000  | -0. 645251000 | 4. 722965000  |
| H | 4. 048860000  | 0. 719189000  | 5. 131810000  |
| C | -3. 383107000 | -1. 149696000 | -1. 892880000 |
| C | -3. 467031000 | -1. 339144000 | -0. 504215000 |
| C | -3. 443823000 | -2. 673027000 | -0. 062231000 |
| C | -3. 340260000 | -3. 751231000 | -0. 940499000 |
| C | -3. 261979000 | -3. 520589000 | -2. 310592000 |
| C | -3. 285043000 | -2. 212445000 | -2. 787741000 |
| H | -3. 411064000 | -0. 137721000 | -2. 286025000 |
| H | -3. 331807000 | -4. 761917000 | -0. 545066000 |
| H | -3. 237053000 | -2. 016489000 | -3. 855486000 |
| C | -0. 162018000 | -0. 472685000 | 2. 302749000  |
| C | -0. 979736000 | 0. 571746000  | 1. 863822000  |
| C | -1. 554551000 | 1. 349242000  | 2. 883061000  |
| C | -1. 364820000 | 1. 063133000  | 4. 231645000  |
| C | -0. 592473000 | -0. 032885000 | 4. 615990000  |
| C | 0. 024436000  | -0. 810706000 | 3. 640652000  |
| H | -2. 183282000 | 2. 190471000  | 2. 606181000  |
| H | -1. 838707000 | 1. 685897000  | 4. 984887000  |
| H | 0. 630415000  | -1. 670661000 | 3. 907836000  |
| C | -1. 259002000 | 0. 839315000  | 0. 397330000  |
| C | -2. 765609000 | 1. 042581000  | 0. 128329000  |
| H | -0. 956395000 | -0. 049761000 | -0. 165927000 |
| H | -3. 132022000 | 1. 899581000  | 0. 709124000  |

|    |              |              |              |
|----|--------------|--------------|--------------|
| H  | -2.879761000 | 1.342859000  | -0.919783000 |
| Si | 2.843149000  | -3.545367000 | -1.250514000 |
| C  | 1.128337000  | -4.314074000 | -1.487330000 |
| H  | 0.395054000  | -3.990768000 | -0.741444000 |
| H  | 0.714024000  | -4.125881000 | -2.481975000 |
| H  | 1.243274000  | -5.400205000 | -1.380616000 |
| C  | 3.450310000  | -4.132070000 | 0.453237000  |
| H  | 4.461308000  | -3.798842000 | 0.707841000  |
| H  | 2.767386000  | -3.827053000 | 1.254196000  |
| H  | 3.466568000  | -5.228964000 | 0.445700000  |
| C  | 3.986986000  | -4.245190000 | -2.590905000 |
| H  | 5.027808000  | -3.932506000 | -2.458757000 |
| H  | 3.962755000  | -5.341190000 | -2.569509000 |
| H  | 3.662440000  | -3.922282000 | -3.586385000 |
| C  | 2.813776000  | 5.724335000  | -1.640269000 |
| C  | 3.595154000  | 4.823259000  | -0.920351000 |
| C  | 2.989589000  | 3.680488000  | -0.419172000 |
| C  | 1.632470000  | 3.345633000  | -0.550877000 |
| C  | 0.891995000  | 4.289364000  | -1.294509000 |
| C  | 1.463035000  | 5.442805000  | -1.827317000 |
| H  | 4.653930000  | 4.999559000  | -0.758499000 |
| H  | -0.167183000 | 4.123506000  | -1.453734000 |
| H  | 0.838082000  | 6.132466000  | -2.388063000 |
| C  | 1.047452000  | 2.098110000  | 0.043225000  |
| C  | -0.471575000 | 2.042475000  | -0.158875000 |
| H  | 1.246572000  | 2.148969000  | 1.139444000  |
| H  | -0.934155000 | 2.955466000  | 0.255026000  |
| H  | -0.686776000 | 2.066694000  | -1.235836000 |
| H  | 3.260675000  | 6.625934000  | -2.047581000 |
| H  | -3.192017000 | -4.360750000 | -2.995802000 |
| H  | -0.469906000 | -0.284548000 | 5.665343000  |
| Cl | 4.028106000  | 2.531820000  | 0.452141000  |
| Cl | -3.560947000 | -3.056419000 | 1.646597000  |
| Cl | 0.713183000  | -1.449853000 | 1.100177000  |

***oC3'***<sub>syn</sub>,  $E_{(\text{SCF Done})} = -3794.045414$  a.u.

|    |              |              |              |
|----|--------------|--------------|--------------|
| Sc | -1.342391000 | 0.631839000  | -0.783921000 |
| Si | 6.003587000  | -2.852025000 | -0.716805000 |
| C  | 4.838400000  | -1.354413000 | -0.470431000 |
| C  | 5.009842000  | -4.340408000 | -1.356714000 |
| C  | 6.839204000  | -3.303408000 | 0.924934000  |
| C  | 7.319172000  | -2.369854000 | -1.995557000 |
| C  | -1.102243000 | 1.661192000  | -4.207344000 |
| C  | -1.590229000 | 0.604390000  | -3.255930000 |

|   |              |              |              |
|---|--------------|--------------|--------------|
| C | -2.907177000 | 0.463613000  | -2.727852000 |
| C | -2.959939000 | -0.755358000 | -1.999164000 |
| C | -1.678440000 | -1.406692000 | -2.082273000 |
| C | -0.838876000 | -0.544325000 | -2.871508000 |
| C | -4.089615000 | 1.351659000  | -2.988002000 |
| C | -4.220322000 | -1.270584000 | -1.363856000 |
| C | 3.726170000  | -1.565181000 | 0.560492000  |
| C | 2.759283000  | -0.373227000 | 0.805275000  |
| H | 4.416203000  | -1.105905000 | -1.455552000 |
| H | 5.463701000  | -0.498411000 | -0.181655000 |
| H | 4.242153000  | -4.651348000 | -0.638631000 |
| H | 5.667913000  | -5.200266000 | -1.527654000 |
| H | 4.513350000  | -4.110307000 | -2.307095000 |
| H | 7.392435000  | -2.450883000 | 1.335699000  |
| H | 7.551870000  | -4.123970000 | 0.781792000  |
| H | 6.111123000  | -3.625426000 | 1.678207000  |
| H | 6.866037000  | -2.106320000 | -2.958475000 |
| H | 8.015628000  | -3.197836000 | -2.171112000 |
| H | 7.905455000  | -1.509120000 | -1.653607000 |
| H | -1.871919000 | 2.408312000  | -4.422450000 |
| H | -0.827995000 | 1.205816000  | -5.167331000 |
| H | -0.216679000 | 2.191353000  | -3.840041000 |
| H | -3.808294000 | 2.289937000  | -3.474241000 |
| H | -4.641975000 | 1.601007000  | -2.074646000 |
| H | -4.799956000 | 0.849677000  | -3.657374000 |
| H | -4.855054000 | -0.455393000 | -0.999978000 |
| H | -4.025852000 | -1.941163000 | -0.526252000 |
| H | -4.819579000 | -1.829572000 | -2.095503000 |
| H | 4.170287000  | -1.828433000 | 1.529167000  |
| H | 3.109849000  | -2.427832000 | 0.268583000  |
| H | 2.037516000  | -0.736669000 | 1.548986000  |
| C | -2.184733000 | 3.714316000  | -1.262538000 |
| O | -2.349195000 | 2.541212000  | -0.391408000 |
| C | -3.277297000 | 2.864400000  | 0.692962000  |
| C | -3.537759000 | 4.358743000  | 0.572279000  |
| C | -3.359878000 | 4.612013000  | -0.925606000 |
| H | -1.222856000 | 4.171318000  | -1.018418000 |
| H | -2.171457000 | 3.354892000  | -2.291441000 |
| H | -4.182935000 | 2.268855000  | 0.538276000  |
| H | -2.799888000 | 2.590836000  | 1.635687000  |
| H | -4.532137000 | 4.626114000  | 0.939801000  |
| H | -2.795103000 | 4.919436000  | 1.149195000  |
| H | -4.254230000 | 4.311270000  | -1.482396000 |
| H | -3.146730000 | 5.659075000  | -1.157393000 |



|    |               |               |               |
|----|---------------|---------------|---------------|
| C  | 4. 154157000  | 1. 756431000  | 0. 664207000  |
| C  | 3. 484079000  | 0. 798174000  | 1. 438960000  |
| C  | 3. 586478000  | 0. 948347000  | 2. 831471000  |
| C  | 4. 303035000  | 1. 986955000  | 3. 422975000  |
| C  | 4. 953813000  | 2. 917483000  | 2. 618944000  |
| C  | 4. 878296000  | 2. 800361000  | 1. 233403000  |
| H  | 4. 102684000  | 1. 681084000  | -0. 417527000 |
| H  | 4. 348111000  | 2. 057048000  | 4. 505013000  |
| H  | 5. 382891000  | 3. 518869000  | 0. 593488000  |
| C  | 0. 852400000  | 3. 486400000  | 0. 347874000  |
| C  | 1. 087910000  | 2. 402536000  | -0. 527261000 |
| C  | 1. 626656000  | 2. 764353000  | -1. 783678000 |
| C  | 1. 927762000  | 4. 076267000  | -2. 130170000 |
| C  | 1. 695557000  | 5. 110670000  | -1. 223117000 |
| C  | 1. 155636000  | 4. 807700000  | 0. 023881000  |
| H  | 2. 354455000  | 4. 290525000  | -3. 106519000 |
| H  | 0. 981807000  | 5. 588995000  | 0. 757597000  |
| C  | 0. 794954000  | 0. 982646000  | -0. 195456000 |
| C  | 1. 928125000  | -0. 030931000 | -0. 450210000 |
| H  | 0. 567264000  | 0. 940690000  | 0. 883005000  |
| H  | 2. 576136000  | 0. 320406000  | -1. 261369000 |
| H  | 1. 521100000  | -0. 986299000 | -0. 802591000 |
| C  | 0. 513920000  | -0. 862628000 | -3. 437520000 |
| H  | 1. 034603000  | -1. 636596000 | -2. 871001000 |
| H  | 0. 410585000  | -1. 225823000 | -4. 469257000 |
| H  | 1. 164684000  | 0. 015981000  | -3. 473557000 |
| Si | -1. 300615000 | -3. 267381000 | -1. 789267000 |
| C  | 0. 212262000  | -3. 566194000 | -0. 683113000 |
| H  | 0. 125918000  | -3. 077380000 | 0. 294194000  |
| H  | 0. 305270000  | -4. 644218000 | -0. 502140000 |
| H  | 1. 147811000  | -3. 235644000 | -1. 144472000 |
| C  | -2. 755107000 | -4. 206326000 | -1. 021140000 |
| H  | -3. 667140000 | -4. 130871000 | -1. 621067000 |
| H  | -2. 472779000 | -5. 266279000 | -0. 990087000 |
| H  | -2. 984599000 | -3. 901143000 | 0. 004152000  |
| C  | -0. 998591000 | -4. 039665000 | -3. 494281000 |
| H  | -1. 858279000 | -3. 872436000 | -4. 153027000 |
| H  | -0. 107884000 | -3. 648412000 | -3. 994543000 |
| H  | -0. 868209000 | -5. 123128000 | -3. 385811000 |
| C  | -4. 849442000 | -4. 196215000 | 3. 040279000  |
| C  | -5. 649671000 | -3. 098631000 | 2. 733254000  |
| C  | -5. 053873000 | -1. 885863000 | 2. 402052000  |
| C  | -3. 650360000 | -1. 740842000 | 2. 355688000  |
| C  | -2. 873129000 | -2. 869919000 | 2. 681616000  |

|    |              |              |              |
|----|--------------|--------------|--------------|
| C  | -3.458148000 | -4.081802000 | 3.018441000  |
| H  | -6.731601000 | -3.176392000 | 2.753813000  |
| H  | -1.791818000 | -2.773487000 | 2.707097000  |
| C  | -3.030392000 | -0.452070000 | 2.077783000  |
| C  | -1.742716000 | -0.208241000 | 1.731413000  |
| H  | -3.683313000 | 0.406226000  | 2.223470000  |
| H  | -1.352452000 | 0.805339000  | 1.839655000  |
| H  | -1.002796000 | -1.003124000 | 1.635916000  |
| H  | -2.834311000 | -4.931263000 | 3.278839000  |
| Cl | -6.104711000 | -0.543227000 | 2.030899000  |
| Cl | 2.806102000  | -0.191866000 | 3.919127000  |
| H  | 5.515895000  | 3.726104000  | 3.077767000  |
| H  | 1.938867000  | 6.138805000  | -1.474139000 |
| H  | -5.317602000 | -5.138881000 | 3.308439000  |
| H  | 1.836904000  | 1.969714000  | -2.495131000 |
| Cl | 0.179434000  | 3.209250000  | 1.951238000  |

***o*TS3<sup>a</sup><sub>syn</sub>,  $E_{(\text{SCF Done})} = -3794.025203$  a.u. IF =  $i290.5$  cm<sup>-1</sup>**

|    |              |              |              |
|----|--------------|--------------|--------------|
| Sc | -1.649873000 | 0.307214000  | -0.537919000 |
| Si | 5.683673000  | -1.671544000 | -1.579516000 |
| C  | 4.258962000  | -0.475416000 | -1.116705000 |
| C  | 5.046377000  | -3.454537000 | -1.709225000 |
| C  | 7.040762000  | -1.574481000 | -0.259180000 |
| C  | 6.372422000  | -1.118250000 | -3.257722000 |
| C  | -2.501083000 | 0.600311000  | -4.095281000 |
| C  | -2.380702000 | -0.276898000 | -2.882340000 |
| C  | -3.455237000 | -0.639167000 | -2.022358000 |
| C  | -3.005721000 | -1.680608000 | -1.163837000 |
| C  | -1.640811000 | -1.995035000 | -1.488219000 |
| C  | -1.263812000 | -1.098364000 | -2.546607000 |
| C  | -4.881428000 | -0.191569000 | -2.150960000 |
| C  | -3.919968000 | -2.423464000 | -0.235729000 |
| C  | 3.567512000  | -0.762695000 | 0.219065000  |
| C  | 2.558008000  | 0.304033000  | 0.725747000  |
| H  | 3.535355000  | -0.479934000 | -1.945839000 |
| H  | 4.699777000  | 0.530960000  | -1.101918000 |
| H  | 4.619450000  | -3.803644000 | -0.762175000 |
| H  | 5.867015000  | -4.132968000 | -1.970214000 |
| H  | 4.278136000  | -3.553965000 | -2.484955000 |
| H  | 7.408026000  | -0.548744000 | -0.139029000 |
| H  | 7.894444000  | -2.201448000 | -0.541640000 |
| H  | 6.687633000  | -1.922025000 | 0.718384000  |
| H  | 5.603285000  | -1.151819000 | -4.038434000 |
| H  | 7.194711000  | -1.769838000 | -3.574971000 |

|   |              |              |              |
|---|--------------|--------------|--------------|
| H | 6.760195000  | -0.094035000 | -3.210822000 |
| H | -3.023298000 | 1.544001000  | -3.904817000 |
| H | -3.066726000 | 0.075114000  | -4.876425000 |
| H | -1.525956000 | 0.842975000  | -4.525495000 |
| H | -4.982925000 | 0.712576000  | -2.758183000 |
| H | -5.357910000 | -0.009100000 | -1.182220000 |
| H | -5.473951000 | -0.971830000 | -2.647211000 |
| H | -4.688096000 | -1.770813000 | 0.191668000  |
| H | -3.381828000 | -2.889138000 | 0.588851000  |
| H | -4.450992000 | -3.218460000 | -0.777377000 |
| H | 4.321554000  | -0.876254000 | 1.008039000  |
| H | 3.042448000  | -1.725915000 | 0.164606000  |
| H | 2.189775000  | -0.065715000 | 1.690719000  |
| C | -3.718428000 | 2.773452000  | -0.973760000 |
| O | -3.299626000 | 1.752485000  | -0.009943000 |
| C | -4.216279000 | 1.768512000  | 1.133864000  |
| C | -5.032238000 | 3.040383000  | 0.978778000  |
| C | -5.110373000 | 3.197985000  | -0.539981000 |
| H | -3.002499000 | 3.594465000  | -0.912067000 |
| H | -3.674519000 | 2.325753000  | -1.967006000 |
| H | -4.838404000 | 0.869474000  | 1.076112000  |
| H | -3.622474000 | 1.739750000  | 2.048603000  |
| H | -6.012429000 | 2.951455000  | 1.454989000  |
| H | -4.508256000 | 3.889750000  | 1.430567000  |
| H | -5.873088000 | 2.534450000  | -0.961223000 |
| H | -5.336547000 | 4.220822000  | -0.853721000 |
| C | 3.397095000  | 2.609452000  | 0.011211000  |
| C | 3.252211000  | 1.625909000  | 1.001425000  |
| C | 3.831810000  | 1.907378000  | 2.249621000  |
| C | 4.515067000  | 3.095754000  | 2.502008000  |
| C | 4.638546000  | 4.046985000  | 1.494219000  |
| C | 4.076444000  | 3.802335000  | 0.243732000  |
| H | 2.966483000  | 2.434493000  | -0.970885000 |
| H | 4.944466000  | 3.265911000  | 3.484018000  |
| H | 4.167858000  | 4.535989000  | -0.552251000 |
| C | -0.453659000 | 3.843224000  | -0.194613000 |
| C | -0.141506000 | 2.514446000  | -0.612001000 |
| C | -0.304490000 | 2.249070000  | -1.991823000 |
| C | -0.675024000 | 3.248198000  | -2.907157000 |
| C | -0.901436000 | 4.540053000  | -2.467121000 |
| C | -0.787916000 | 4.835168000  | -1.099465000 |
| H | -0.734176000 | 3.012724000  | -3.964615000 |
| H | -0.952177000 | 5.846674000  | -0.740474000 |
| C | 0.331950000  | 1.491185000  | 0.320561000  |

|    |              |              |              |
|----|--------------|--------------|--------------|
| C  | 1.323529000  | 0.439428000  | -0.196288000 |
| H  | 0.726646000  | 1.978329000  | 1.205270000  |
| H  | 1.649994000  | 0.684869000  | -1.214630000 |
| H  | 0.880926000  | -0.573208000 | -0.275255000 |
| C  | 0.015779000  | -1.156534000 | -3.336617000 |
| H  | 0.875212000  | -1.425721000 | -2.717720000 |
| H  | -0.057836000 | -1.908819000 | -4.132277000 |
| H  | 0.249395000  | -0.210526000 | -3.836786000 |
| Si | -0.827588000 | -3.726070000 | -1.263781000 |
| C  | 1.030711000  | -3.687730000 | -0.894951000 |
| H  | 1.235664000  | -3.252120000 | 0.086629000  |
| H  | 1.390603000  | -4.723821000 | -0.873330000 |
| H  | 1.622337000  | -3.157591000 | -1.646714000 |
| C  | -1.650617000 | -4.809760000 | 0.049676000  |
| H  | -2.685641000 | -5.056579000 | -0.205431000 |
| H  | -1.091267000 | -5.753218000 | 0.084853000  |
| H  | -1.627727000 | -4.377220000 | 1.053146000  |
| C  | -1.097580000 | -4.595117000 | -2.931827000 |
| H  | -2.161479000 | -4.619762000 | -3.193424000 |
| H  | -0.557538000 | -4.120623000 | -3.757106000 |
| H  | -0.747747000 | -5.632270000 | -2.862526000 |
| C  | -0.687492000 | -4.025144000 | 3.820324000  |
| C  | -2.001263000 | -3.567896000 | 3.858663000  |
| C  | -2.359997000 | -2.424676000 | 3.146691000  |
| C  | -1.436326000 | -1.710822000 | 2.358230000  |
| C  | -0.121050000 | -2.202959000 | 2.348236000  |
| C  | 0.257829000  | -3.330961000 | 3.067268000  |
| H  | -2.750341000 | -4.078656000 | 4.455165000  |
| H  | 0.622006000  | -1.675056000 | 1.758093000  |
| C  | -1.799460000 | -0.433188000 | 1.708315000  |
| C  | -0.989690000 | 0.702175000  | 1.897939000  |
| H  | -2.874320000 | -0.264032000 | 1.640699000  |
| H  | -1.439364000 | 1.686286000  | 1.997432000  |
| H  | -0.087400000 | 0.575731000  | 2.488042000  |
| H  | 1.289212000  | -3.670239000 | 3.034221000  |
| Cl | -4.007257000 | -1.852489000 | 3.339474000  |
| Cl | 3.720649000  | 0.756632000  | 3.568342000  |
| H  | 5.172021000  | 4.972619000  | 1.690369000  |
| H  | -1.151382000 | 5.330686000  | -3.168260000 |
| H  | -0.407905000 | -4.911493000 | 4.381846000  |
| H  | 0.038488000  | 1.295390000  | -2.387390000 |
| Cl | -0.337882000 | 4.286420000  | 1.487107000  |

***oP3***<sup>a</sup><sub>syn</sub>,  $E_{(\text{SCF Done})} = -3794.073374$  a.u.

|    |              |              |              |
|----|--------------|--------------|--------------|
| Sc | 2.691951000  | 0.394256000  | 0.133049000  |
| Si | -7.164567000 | 0.815230000  | 1.936931000  |
| C  | -5.652720000 | 0.774723000  | 0.763501000  |
| C  | -6.575869000 | 0.960581000  | 3.736837000  |
| C  | -8.197573000 | -0.761716000 | 1.727178000  |
| C  | -8.211449000 | 2.331963000  | 1.486833000  |
| C  | 5.098789000  | 1.948199000  | 2.426418000  |
| C  | 4.392669000  | 0.695325000  | 1.987195000  |
| C  | 4.890367000  | -0.281594000 | 1.076553000  |
| C  | 4.017707000  | -1.411170000 | 1.127255000  |
| C  | 2.957526000  | -1.142575000 | 2.056172000  |
| C  | 3.211315000  | 0.172453000  | 2.583937000  |
| C  | 6.196845000  | -0.219541000 | 0.337105000  |
| C  | 4.295890000  | -2.722293000 | 0.450129000  |
| C  | -4.696551000 | -0.400258000 | 0.981866000  |
| C  | -3.440413000 | -0.472235000 | 0.067195000  |
| H  | -5.130315000 | 1.734807000  | 0.886548000  |
| H  | -6.037013000 | 0.764401000  | -0.265647000 |
| H  | -5.989056000 | 0.087385000  | 4.044625000  |
| H  | -7.432691000 | 1.036097000  | 4.416482000  |
| H  | -5.956842000 | 1.853599000  | 3.884307000  |
| H  | -8.539664000 | -0.879083000 | 0.692339000  |
| H  | -9.085845000 | -0.726162000 | 2.368611000  |
| H  | -7.631182000 | -1.660027000 | 1.998008000  |
| H  | -7.641507000 | 3.261275000  | 1.603146000  |
| H  | -9.095520000 | 2.402003000  | 2.131180000  |
| H  | -8.560697000 | 2.279773000  | 0.449042000  |
| H  | 5.945514000  | 2.193042000  | 1.779703000  |
| H  | 5.506889000  | 1.814387000  | 3.436675000  |
| H  | 4.443311000  | 2.825800000  | 2.464517000  |
| H  | 6.521798000  | 0.807482000  | 0.139456000  |
| H  | 6.158667000  | -0.744426000 | -0.622144000 |
| H  | 6.991934000  | -0.692322000 | 0.928830000  |
| H  | 4.952297000  | -2.604524000 | -0.416287000 |
| H  | 3.385362000  | -3.220757000 | 0.115325000  |
| H  | 4.808095000  | -3.399668000 | 1.147125000  |
| H  | -5.241350000 | -1.344324000 | 0.855127000  |
| H  | -4.335546000 | -0.397890000 | 2.020497000  |
| H  | -2.911904000 | -1.375973000 | 0.388908000  |
| C  | 4.334797000  | 3.165918000  | -0.684590000 |
| O  | 3.278122000  | 2.209021000  | -1.006382000 |
| C  | 2.621430000  | 2.615173000  | -2.259231000 |
| C  | 3.143515000  | 4.010983000  | -2.551244000 |
| C  | 4.552354000  | 3.964178000  | -1.957755000 |

|    |               |               |               |
|----|---------------|---------------|---------------|
| H  | 3. 975619000  | 3. 792823000  | 0. 137105000  |
| H  | 5. 207263000  | 2. 599440000  | -0. 359634000 |
| H  | 2. 912537000  | 1. 895668000  | -3. 028690000 |
| H  | 1. 544408000  | 2. 567250000  | -2. 097449000 |
| H  | 3. 135490000  | 4. 227466000  | -3. 622823000 |
| H  | 2. 534249000  | 4. 766048000  | -2. 043362000 |
| H  | 5. 239936000  | 3. 438908000  | -2. 630150000 |
| H  | 4. 966625000  | 4. 954725000  | -1. 751159000 |
| C  | -4. 117875000 | 0. 420299000  | -2. 222360000 |
| C  | -3. 814015000 | -0. 667960000 | -1. 389496000 |
| C  | -3. 923686000 | -1. 941507000 | -1. 971500000 |
| C  | -4. 303448000 | -2. 128028000 | -3. 299388000 |
| C  | -4. 593344000 | -1. 022895000 | -4. 093456000 |
| C  | -4. 501107000 | 0. 256303000  | -3. 550862000 |
| H  | -4. 056459000 | 1. 424188000  | -1. 812735000 |
| H  | -4. 372909000 | -3. 134527000 | -3. 699303000 |
| H  | -4. 731409000 | 1. 127383000  | -4. 158071000 |
| C  | -0. 542069000 | 3. 189675000  | -0. 585279000 |
| C  | -0. 364652000 | 1. 915870000  | -0. 017452000 |
| C  | 0. 522258000  | 1. 840589000  | 1. 074921000  |
| C  | 1. 174942000  | 2. 968636000  | 1. 586149000  |
| C  | 0. 964871000  | 4. 215326000  | 1. 001781000  |
| C  | 0. 103189000  | 4. 323121000  | -0. 085668000 |
| H  | 1. 805908000  | 2. 877971000  | 2. 462771000  |
| H  | -0. 089782000 | 5. 287484000  | -0. 546037000 |
| C  | -1. 156707000 | 0. 704174000  | -0. 455627000 |
| C  | -2. 496973000 | 0. 715300000  | 0. 325650000  |
| H  | -1. 391627000 | 0. 824016000  | -1. 520592000 |
| H  | -3. 007798000 | 1. 664248000  | 0. 123222000  |
| H  | -2. 271057000 | 0. 723513000  | 1. 401879000  |
| C  | 2. 546065000  | 0. 788102000  | 3. 786076000  |
| H  | 1. 454759000  | 0. 829047000  | 3. 722100000  |
| H  | 2. 784053000  | 0. 202080000  | 4. 683068000  |
| H  | 2. 913858000  | 1. 800668000  | 3. 977400000  |
| Si | 1. 880206000  | -2. 460176000 | 2. 942181000  |
| C  | 0. 255549000  | -1. 755682000 | 3. 632494000  |
| H  | -0. 359893000 | -1. 250715000 | 2. 880403000  |
| H  | -0. 335631000 | -2. 596161000 | 4. 016649000  |
| H  | 0. 415195000  | -1. 067407000 | 4. 467655000  |
| C  | 1. 457246000  | -3. 954578000 | 1. 861583000  |
| H  | 2. 331076000  | -4. 584490000 | 1. 669168000  |
| H  | 0. 725641000  | -4. 568658000 | 2. 401029000  |
| H  | 1. 016547000  | -3. 677781000 | 0. 899673000  |
| C  | 2. 929414000  | -3. 059447000 | 4. 406229000  |

|    |              |              |              |
|----|--------------|--------------|--------------|
| H  | 3.868881000  | -3.506958000 | 4.062996000  |
| H  | 3.177788000  | -2.246129000 | 5.096805000  |
| H  | 2.383655000  | -3.822716000 | 4.973744000  |
| C  | 2.187435000  | -4.212378000 | -3.130377000 |
| C  | 3.004867000  | -3.083645000 | -3.101334000 |
| C  | 2.585353000  | -1.992723000 | -2.357893000 |
| C  | 1.380117000  | -1.898542000 | -1.644745000 |
| C  | 0.603423000  | -3.073723000 | -1.690069000 |
| C  | 0.996124000  | -4.200770000 | -2.409819000 |
| H  | 3.952048000  | -3.059370000 | -3.630965000 |
| H  | -0.343243000 | -3.110164000 | -1.161719000 |
| C  | 0.998104000  | -0.635883000 | -0.939772000 |
| C  | -0.403669000 | -0.626848000 | -0.312096000 |
| H  | 1.024704000  | 0.162722000  | -1.716253000 |
| H  | -1.048275000 | -1.365558000 | -0.801240000 |
| H  | -0.368881000 | -0.934196000 | 0.743195000  |
| H  | 0.352091000  | -5.075711000 | -2.411719000 |
| Cl | 3.691702000  | -0.599302000 | -2.254678000 |
| Cl | -3.586874000 | -3.389066000 | -1.032738000 |
| H  | -4.892376000 | -1.166628000 | -5.127865000 |
| H  | 1.442703000  | 5.104027000  | 1.404117000  |
| H  | 2.489427000  | -5.085883000 | -3.699893000 |
| H  | 0.588542000  | 0.893490000  | 1.616754000  |
| Cl | -1.602094000 | 3.417031000  | -1.951128000 |

***oC3*<sup>iso</sup>,  $E_{(\text{SCF Done})} = -3794.043034$  a.u.**

|    |              |              |              |
|----|--------------|--------------|--------------|
| Sc | -1.287744000 | 0.910600000  | 0.797493000  |
| Si | 6.436419000  | 1.055370000  | -1.329399000 |
| C  | 4.872090000  | 0.379163000  | -0.456766000 |
| C  | 5.950076000  | 2.260284000  | -2.714613000 |
| C  | 7.431025000  | -0.382891000 | -2.062907000 |
| C  | 7.478968000  | 1.964374000  | -0.030967000 |
| C  | -1.993561000 | 2.933385000  | 3.717020000  |
| C  | -1.769722000 | 2.921212000  | 2.230151000  |
| C  | -2.773277000 | 2.922692000  | 1.217709000  |
| C  | -2.128591000 | 3.098771000  | -0.036048000 |
| C  | -0.706521000 | 3.225727000  | 0.174637000  |
| C  | -0.506744000 | 3.120176000  | 1.591759000  |
| C  | -4.262843000 | 2.894346000  | 1.409628000  |
| C  | -2.883661000 | 3.376463000  | -1.306241000 |
| C  | 3.901382000  | -0.387027000 | -1.359351000 |
| C  | 2.671094000  | -1.040950000 | -0.672424000 |
| H  | 4.368775000  | 1.229690000  | 0.026947000  |
| H  | 5.221774000  | -0.270184000 | 0.357912000  |

|   |               |               |               |
|---|---------------|---------------|---------------|
| H | 5. 363930000  | 1. 761868000  | -3. 495293000 |
| H | 6. 845078000  | 2. 676636000  | -3. 191499000 |
| H | 5. 359526000  | 3. 100356000  | -2. 330346000 |
| H | 7. 717867000  | -1. 106088000 | -1. 290668000 |
| H | 8. 351376000  | -0. 015037000 | -2. 531329000 |
| H | 6. 862367000  | -0. 919416000 | -2. 830952000 |
| H | 6. 929238000  | 2. 804357000  | 0. 409785000  |
| H | 8. 395818000  | 2. 365613000  | -0. 477935000 |
| H | 7. 773236000  | 1. 290906000  | 0. 782285000  |
| H | -3. 041178000 | 2. 754782000  | 3. 975634000  |
| H | -1. 729238000 | 3. 913712000  | 4. 133460000  |
| H | -1. 393336000 | 2. 185484000  | 4. 245703000  |
| H | -4. 543260000 | 2. 756977000  | 2. 457683000  |
| H | -4. 752112000 | 2. 104396000  | 0. 827399000  |
| H | -4. 705539000 | 3. 845668000  | 1. 088436000  |
| H | -3. 841587000 | 2. 847511000  | -1. 340880000 |
| H | -2. 320792000 | 3. 123325000  | -2. 207857000 |
| H | -3. 120073000 | 4. 447048000  | -1. 370848000 |
| H | 4. 439580000  | -1. 187623000 | -1. 882710000 |
| H | 3. 520066000  | 0. 281558000  | -2. 145069000 |
| H | 2. 115751000  | -1. 534844000 | -1. 480125000 |
| C | -3. 512105000 | -0. 296914000 | 2. 782721000  |
| O | -3. 013704000 | -0. 265474000 | 1. 403293000  |
| C | -3. 679389000 | -1. 311846000 | 0. 614601000  |
| C | -4. 387129000 | -2. 182274000 | 1. 637274000  |
| C | -4. 748626000 | -1. 177688000 | 2. 732449000  |
| H | -2. 723373000 | -0. 725734000 | 3. 406675000  |
| H | -3. 705571000 | 0. 732757000  | 3. 082018000  |
| H | -4. 380571000 | -0. 811424000 | -0. 058142000 |
| H | -2. 914826000 | -1. 833423000 | 0. 037985000  |
| H | -5. 260259000 | -2. 678829000 | 1. 205397000  |
| H | -3. 708033000 | -2. 950765000 | 2. 020758000  |
| H | -5. 629958000 | -0. 592165000 | 2. 447491000  |
| H | -4. 948375000 | -1. 648917000 | 3. 698692000  |
| C | 3. 416922000  | -1. 836793000 | 1. 632553000  |
| C | 3. 090311000  | -2. 126723000 | 0. 299222000  |
| C | 3. 237254000  | -3. 466247000 | -0. 096025000 |
| C | 3. 673575000  | -4. 460448000 | 0. 778068000  |
| C | 3. 984984000  | -4. 132511000 | 2. 093923000  |
| C | 3. 857129000  | -2. 813527000 | 2. 521839000  |
| H | 3. 327793000  | -0. 812068000 | 1. 981059000  |
| H | 3. 768966000  | -5. 480867000 | 0. 421110000  |
| H | 4. 103522000  | -2. 541753000 | 3. 544586000  |
| C | -0. 364768000 | -2. 174082000 | 2. 259162000  |



|    |              |              |              |
|----|--------------|--------------|--------------|
| C  | 0.186490000  | -0.947937000 | 1.783561000  |
| C  | 0.402558000  | 0.038197000  | 2.782746000  |
| C  | 0.186036000  | -0.202318000 | 4.147850000  |
| C  | -0.305112000 | -1.429535000 | 4.564133000  |
| C  | -0.581970000 | -2.416285000 | 3.605948000  |
| H  | 0.436788000  | 0.564661000  | 4.875700000  |
| H  | -0.945872000 | -3.391598000 | 3.915768000  |
| C  | 0.365174000  | -0.599604000 | 0.380323000  |
| C  | 1.698827000  | 0.006082000  | -0.082435000 |
| H  | 0.074423000  | -1.427979000 | -0.268939000 |
| H  | 2.175317000  | 0.562802000  | 0.734327000  |
| H  | 1.531927000  | 0.746216000  | -0.878273000 |
| C  | 0.760154000  | 3.397088000  | 2.353515000  |
| H  | 1.650565000  | 2.973560000  | 1.881178000  |
| H  | 0.924705000  | 4.480169000  | 2.426361000  |
| H  | 0.703287000  | 3.021762000  | 3.379938000  |
| Si | 0.493636000  | 4.026226000  | -1.097375000 |
| C  | 2.283627000  | 4.105346000  | -0.482804000 |
| H  | 2.706139000  | 3.119185000  | -0.264388000 |
| H  | 2.885860000  | 4.545624000  | -1.287098000 |
| H  | 2.405261000  | 4.741508000  | 0.398625000  |
| C  | 0.546257000  | 3.153016000  | -2.784791000 |
| H  | -0.418662000 | 3.098992000  | -3.298708000 |
| H  | 1.216453000  | 3.734793000  | -3.430153000 |
| H  | 0.962464000  | 2.141703000  | -2.724007000 |
| C  | -0.125826000 | 5.800344000  | -1.346959000 |
| H  | -1.117730000 | 5.833007000  | -1.809240000 |
| H  | -0.179516000 | 6.338493000  | -0.394054000 |
| H  | 0.563150000  | 6.346523000  | -2.002142000 |
| C  | -4.527887000 | -3.534228000 | -3.909497000 |
| C  | -5.331733000 | -2.460890000 | -3.537628000 |
| C  | -4.745727000 | -1.312203000 | -3.012503000 |
| C  | -3.349709000 | -1.195955000 | -2.848140000 |
| C  | -2.570443000 | -2.302519000 | -3.238306000 |
| C  | -3.142612000 | -3.454908000 | -3.756776000 |
| H  | -6.409517000 | -2.506389000 | -3.654380000 |
| H  | -1.489814000 | -2.244827000 | -3.149265000 |
| H  | -2.509959000 | -4.286126000 | -4.053059000 |
| C  | -2.743372000 | 0.031061000  | -2.328746000 |
| C  | -1.443203000 | 0.227451000  | -2.024835000 |
| H  | -3.423873000 | 0.869113000  | -2.211397000 |
| H  | -1.081369000 | 1.231895000  | -1.805030000 |
| H  | -0.682301000 | -0.531726000 | -2.164155000 |
| H  | -4.985658000 | -4.428019000 | -4.323341000 |

|    |              |              |              |
|----|--------------|--------------|--------------|
| H  | -0.461532000 | -1.641726000 | 5.617490000  |
| H  | 4.328742000  | -4.905993000 | 2.774934000  |
| Cl | -5.818818000 | -0.008883000 | -2.548956000 |
| Cl | 2.881241000  | -3.959919000 | -1.742853000 |
| Cl | -0.699994000 | -3.469392000 | 1.137411000  |
| H  | 0.907943000  | 0.955779000  | 2.489700000  |

***o*TS3<sup>a</sup><sub>iso</sub>,  $E_{(\text{SCF Done})} = -3794.022963$  a.u.  $\text{IF} = i119.9$  cm<sup>-1</sup>**

|    |              |              |              |
|----|--------------|--------------|--------------|
| Sc | -1.734902000 | 0.686043000  | 0.487641000  |
| Si | 6.542471000  | 1.524447000  | -0.496811000 |
| C  | 4.911486000  | 0.666282000  | 0.027634000  |
| C  | 6.212758000  | 2.711305000  | -1.941265000 |
| C  | 7.810397000  | 0.213374000  | -1.014953000 |
| C  | 7.192528000  | 2.499678000  | 0.994769000  |
| C  | -2.969952000 | 2.553486000  | 3.372505000  |
| C  | -2.509708000 | 2.608740000  | 1.941411000  |
| C  | -3.319827000 | 2.599682000  | 0.768673000  |
| C  | -2.483766000 | 2.911485000  | -0.339941000 |
| C  | -1.135358000 | 3.115081000  | 0.127848000  |
| C  | -1.177538000 | 2.928693000  | 1.548060000  |
| C  | -4.813623000 | 2.457703000  | 0.691078000  |
| C  | -3.019368000 | 3.254812000  | -1.700869000 |
| C  | 4.202634000  | -0.103592000 | -1.089680000 |
| C  | 2.918673000  | -0.886158000 | -0.698238000 |
| H  | 4.251929000  | 1.440626000  | 0.447186000  |
| H  | 5.156806000  | -0.011275000 | 0.857089000  |
| H  | 5.836911000  | 2.182644000  | -2.824982000 |
| H  | 7.136491000  | 3.223782000  | -2.233875000 |
| H  | 5.480291000  | 3.480591000  | -1.669220000 |
| H  | 8.005037000  | -0.493645000 | -0.200200000 |
| H  | 8.764205000  | 0.682914000  | -1.282195000 |
| H  | 7.470863000  | -0.360597000 | -1.884596000 |
| H  | 6.479618000  | 3.270660000  | 1.310032000  |
| H  | 8.136486000  | 3.000676000  | 0.751234000  |
| H  | 7.378111000  | 1.841678000  | 1.851691000  |
| H  | -4.057818000 | 2.475014000  | 3.450501000  |
| H  | -2.687404000 | 3.477343000  | 3.891941000  |
| H  | -2.533907000 | 1.722935000  | 3.940849000  |
| H  | -5.260325000 | 2.242798000  | 1.665918000  |
| H  | -5.127287000 | 1.669812000  | -0.003015000 |
| H  | -5.265881000 | 3.392936000  | 0.337521000  |
| H  | -3.924976000 | 2.691734000  | -1.944088000 |
| H  | -2.295372000 | 3.082698000  | -2.501291000 |
| H  | -3.289867000 | 4.318718000  | -1.736192000 |

|    |              |              |              |
|----|--------------|--------------|--------------|
| H  | 4.894072000  | -0.828830000 | -1.537041000 |
| H  | 3.928063000  | 0.588336000  | -1.898732000 |
| H  | 2.552027000  | -1.327304000 | -1.634132000 |
| C  | -4.001941000 | -0.553256000 | 2.518534000  |
| O  | -3.330565000 | -0.625443000 | 1.217719000  |
| C  | -3.832313000 | -1.797629000 | 0.483295000  |
| C  | -4.494109000 | -2.663050000 | 1.536431000  |
| C  | -5.087062000 | -1.617821000 | 2.481310000  |
| H  | -3.246435000 | -0.756720000 | 3.281161000  |
| H  | -4.384565000 | 0.458077000  | 2.636450000  |
| H  | -4.546132000 | -1.433070000 | -0.258321000 |
| H  | -2.987077000 | -2.263846000 | -0.021507000 |
| H  | -5.247485000 | -3.322796000 | 1.097531000  |
| H  | -3.752867000 | -3.283002000 | 2.052264000  |
| H  | -6.015520000 | -1.208872000 | 2.067775000  |
| H  | -5.302948000 | -2.008970000 | 3.479407000  |
| C  | 3.298452000  | -1.858247000 | 1.630931000  |
| C  | 3.229061000  | -2.036747000 | 0.240977000  |
| C  | 3.524502000  | -3.325376000 | -0.234538000 |
| C  | 3.862392000  | -4.375635000 | 0.617289000  |
| C  | 3.919895000  | -4.158821000 | 1.990398000  |
| C  | 3.637463000  | -2.893422000 | 2.498726000  |
| H  | 3.091666000  | -0.875330000 | 2.044782000  |
| H  | 4.081414000  | -5.352558000 | 0.198536000  |
| H  | 3.687554000  | -2.707719000 | 3.568136000  |
| C  | -0.479424000 | -2.268781000 | 1.697491000  |
| C  | -0.000763000 | -0.984261000 | 1.299533000  |
| C  | 0.020542000  | 0.000981000  | 2.319267000  |
| C  | -0.329622000 | -0.277687000 | 3.647385000  |
| C  | -0.746680000 | -1.553034000 | 3.997312000  |
| C  | -0.821774000 | -2.546150000 | 3.012981000  |
| H  | -0.233841000 | 0.496957000  | 4.402356000  |
| H  | -1.115915000 | -3.557200000 | 3.278001000  |
| C  | 0.450016000  | -0.670850000 | -0.065414000 |
| C  | 1.796902000  | 0.050861000  | -0.206685000 |
| H  | 0.443892000  | -1.595215000 | -0.636715000 |
| H  | 2.078420000  | 0.532093000  | 0.736123000  |
| H  | 1.730667000  | 0.863372000  | -0.941822000 |
| C  | -0.101152000 | 3.265446000  | 2.541421000  |
| H  | 0.905541000  | 3.038360000  | 2.182914000  |
| H  | -0.119161000 | 4.341355000  | 2.762404000  |
| H  | -0.251212000 | 2.750548000  | 3.495433000  |
| Si | 0.176164000  | 4.142470000  | -0.835589000 |
| C  | 1.845626000  | 4.261231000  | 0.058521000  |

|    |              |              |              |
|----|--------------|--------------|--------------|
| H  | 2.292089000  | 3.283380000  | 0.268881000  |
| H  | 2.535300000  | 4.793973000  | -0.607910000 |
| H  | 1.791964000  | 4.830976000  | 0.990658000  |
| C  | 0.577799000  | 3.515003000  | -2.585790000 |
| H  | -0.292553000 | 3.297177000  | -3.211366000 |
| H  | 1.140770000  | 4.312663000  | -3.086945000 |
| H  | 1.224583000  | 2.630760000  | -2.580118000 |
| C  | -0.546317000 | 5.890216000  | -0.967836000 |
| H  | -1.453583000 | 5.917106000  | -1.579822000 |
| H  | -0.794022000 | 6.292628000  | 0.020691000  |
| H  | 0.186181000  | 6.562621000  | -1.430071000 |
| C  | -3.611915000 | -3.503081000 | -3.688572000 |
| C  | -4.420575000 | -2.386720000 | -3.491053000 |
| C  | -3.899450000 | -1.255359000 | -2.871867000 |
| C  | -2.561592000 | -1.172819000 | -2.429425000 |
| C  | -1.779565000 | -2.325934000 | -2.650269000 |
| C  | -2.285170000 | -3.465765000 | -3.264615000 |
| H  | -5.454612000 | -2.383710000 | -3.821056000 |
| H  | -0.738245000 | -2.324683000 | -2.345058000 |
| H  | -1.636131000 | -4.323193000 | -3.418800000 |
| C  | -2.000624000 | 0.045291000  | -1.832895000 |
| C  | -0.605853000 | 0.227300000  | -1.664685000 |
| H  | -2.586069000 | 0.945316000  | -1.990219000 |
| H  | -0.281936000 | 1.261620000  | -1.540123000 |
| H  | 0.101733000  | -0.339491000 | -2.263194000 |
| H  | -4.016719000 | -4.385261000 | -4.175353000 |
| H  | -0.994220000 | -1.795413000 | 5.026684000  |
| H  | 4.188389000  | -4.975945000 | 2.653972000  |
| Cl | -4.991480000 | 0.102789000  | -2.656558000 |
| Cl | 3.485354000  | -3.678311000 | -1.952202000 |
| Cl | -0.539377000 | -3.586746000 | 0.565291000  |
| H  | 0.476624000  | 0.959379000  | 2.089068000  |

***oP3***<sup>a</sup><sub>iso</sub>,  $E_{(\text{SCF Done})} = -3794.077119$  a.u.

|    |              |             |              |
|----|--------------|-------------|--------------|
| Sc | -2.768257000 | 0.208158000 | 0.166155000  |
| Si | 7.094644000  | 1.460052000 | 1.630722000  |
| C  | 5.545415000  | 0.471391000 | 1.092979000  |
| C  | 6.562844000  | 3.078808000 | 2.469326000  |
| C  | 8.174414000  | 1.844222000 | 0.119611000  |
| C  | 8.066826000  | 0.392242000 | 2.860709000  |
| C  | -5.330475000 | 1.867639000 | 2.242729000  |
| C  | -4.506624000 | 1.884629000 | 0.985134000  |
| C  | -4.917291000 | 1.393727000 | -0.289929000 |
| C  | -3.955711000 | 1.825133000 | -1.254201000 |

|   |              |              |              |
|---|--------------|--------------|--------------|
| C | -2.918859000 | 2.556334000  | -0.583080000 |
| C | -3.288009000 | 2.594069000  | 0.808571000  |
| C | -6.225423000 | 0.709174000  | -0.573951000 |
| C | -4.101484000 | 1.675060000  | -2.743298000 |
| C | 4.639597000  | 1.189515000  | 0.089959000  |
| C | 3.367959000  | 0.430403000  | -0.387286000 |
| H | 4.993827000  | 0.216437000  | 2.009704000  |
| H | 5.897799000  | -0.480155000 | 0.671677000  |
| H | 6.016206000  | 3.732444000  | 1.779538000  |
| H | 7.438006000  | 3.635019000  | 2.824844000  |
| H | 5.918413000  | 2.885818000  | 3.335211000  |
| H | 8.470486000  | 0.926232000  | -0.401332000 |
| H | 9.090241000  | 2.364360000  | 0.423450000  |
| H | 7.654112000  | 2.486397000  | -0.600056000 |
| H | 7.464017000  | 0.148532000  | 3.743382000  |
| H | 8.966203000  | 0.914634000  | 3.206831000  |
| H | 8.386599000  | -0.550329000 | 2.401358000  |
| H | -6.172765000 | 1.173943000  | 2.170845000  |
| H | -5.759356000 | 2.861857000  | 2.424639000  |
| H | -4.754106000 | 1.604151000  | 3.136795000  |
| H | -6.506473000 | -0.007996000 | 0.205583000  |
| H | -6.217409000 | 0.169352000  | -1.524834000 |
| H | -7.037552000 | 1.445789000  | -0.633639000 |
| H | -4.917904000 | 0.999242000  | -3.008627000 |
| H | -3.195180000 | 1.299727000  | -3.226538000 |
| H | -4.332821000 | 2.648077000  | -3.195126000 |
| H | 5.216587000  | 1.444702000  | -0.807952000 |
| H | 4.301234000  | 2.146692000  | 0.512103000  |
| H | 2.888107000  | 1.107910000  | -1.101735000 |
| C | -4.468687000 | -1.445464000 | 2.487904000  |
| O | -3.449548000 | -1.444426000 | 1.440365000  |
| C | -2.898474000 | -2.798997000 | 1.291921000  |
| C | -3.307911000 | -3.523230000 | 2.559631000  |
| C | -4.678083000 | -2.908125000 | 2.851262000  |
| H | -4.073787000 | -0.861178000 | 3.323654000  |
| H | -5.358491000 | -0.959725000 | 2.086642000  |
| H | -3.350761000 | -3.245846000 | 0.402675000  |
| H | -1.821337000 | -2.703685000 | 1.146791000  |
| H | -3.347074000 | -4.605686000 | 2.410823000  |
| H | -2.603949000 | -3.310344000 | 3.370408000  |
| H | -5.446541000 | -3.358101000 | 2.213000000  |
| H | -4.990410000 | -3.025798000 | 3.892482000  |
| C | 3.933681000  | -2.054463000 | -0.485245000 |
| C | 3.724479000  | -0.833416000 | -1.145566000 |

|    |              |              |              |
|----|--------------|--------------|--------------|
| C  | 3.912354000  | -0.841238000 | -2.538560000 |
| C  | 4.278679000  | -1.991435000 | -3.236318000 |
| C  | 4.474928000  | -3.183664000 | -2.545429000 |
| C  | 4.301955000  | -3.213937000 | -1.163477000 |
| H  | 3.809512000  | -2.092633000 | 0.593002000  |
| H  | 4.412119000  | -1.942799000 | -4.312299000 |
| H  | 4.459944000  | -4.135805000 | -0.610518000 |
| C  | 0.297863000  | -1.518896000 | 2.626564000  |
| C  | 0.183792000  | -0.508940000 | 1.654972000  |
| C  | -0.683864000 | 0.555989000  | 1.970429000  |
| C  | -1.367952000 | 0.630213000  | 3.189372000  |
| C  | -1.212971000 | -0.381939000 | 4.133205000  |
| C  | -0.378121000 | -1.458045000 | 3.847172000  |
| H  | -1.979092000 | 1.497023000  | 3.414334000  |
| H  | -0.226349000 | -2.249509000 | 4.575083000  |
| C  | 1.037951000  | -0.476800000 | 0.406454000  |
| C  | 2.375754000  | 0.221959000  | 0.770511000  |
| H  | 1.272641000  | -1.513747000 | 0.148035000  |
| H  | 2.848356000  | -0.337931000 | 1.586631000  |
| H  | 2.148914000  | 1.215187000  | 1.184654000  |
| C  | -2.681781000 | 3.478183000  | 1.864583000  |
| H  | -1.595773000 | 3.386123000  | 1.955271000  |
| H  | -2.887099000 | 4.530505000  | 1.629126000  |
| H  | -3.123473000 | 3.291990000  | 2.848204000  |
| Si | -1.698503000 | 3.767770000  | -1.437041000 |
| C  | -0.234313000 | 4.251551000  | -0.326149000 |
| H  | 0.313830000  | 3.399520000  | 0.090277000  |
| H  | 0.476458000  | 4.819119000  | -0.939363000 |
| H  | -0.536784000 | 4.902083000  | 0.499839000  |
| C  | -0.997845000 | 3.117884000  | -3.074026000 |
| H  | -1.762014000 | 3.037059000  | -3.852526000 |
| H  | -0.251331000 | 3.839356000  | -3.428621000 |
| H  | -0.494598000 | 2.149911000  | -2.982456000 |
| C  | -2.704226000 | 5.337223000  | -1.790502000 |
| H  | -3.546511000 | 5.132974000  | -2.460565000 |
| H  | -3.106704000 | 5.774509000  | -0.869898000 |
| H  | -2.071035000 | 6.092581000  | -2.270844000 |
| C  | -1.244730000 | -4.341151000 | -2.939849000 |
| C  | -2.405763000 | -3.616211000 | -2.676248000 |
| C  | -2.274814000 | -2.368800000 | -2.085429000 |
| C  | -1.065642000 | -1.745913000 | -1.742848000 |
| C  | 0.075855000  | -2.517740000 | -2.039521000 |
| C  | -0.010077000 | -3.783280000 | -2.616166000 |
| H  | -3.386479000 | -4.012818000 | -2.920327000 |

|    |              |              |              |
|----|--------------|--------------|--------------|
| H  | 1.061415000  | -2.107792000 | -1.846507000 |
| H  | 0.905603000  | -4.328565000 | -2.826321000 |
| C  | -1.041101000 | -0.363603000 | -1.167297000 |
| C  | 0.347779000  | 0.175010000  | -0.803435000 |
| H  | -1.438624000 | 0.298070000  | -1.962351000 |
| H  | 0.272262000  | 1.258079000  | -0.635890000 |
| H  | 1.034351000  | 0.077834000  | -1.657121000 |
| H  | -1.312584000 | -5.324280000 | -3.395579000 |
| H  | -1.712440000 | -0.324932000 | 5.096195000  |
| H  | 4.768248000  | -4.078294000 | -3.087699000 |
| Cl | -3.770640000 | -1.463481000 | -1.732335000 |
| Cl | 3.695536000  | 0.622865000  | -3.480519000 |
| Cl | 1.328789000  | -2.901019000 | 2.361821000  |
| H  | -0.708874000 | 1.416646000  | 1.298370000  |

**$mC3^a_{syn}$** ,  $E_{(SCF Done)} = -3794.048489$  a.u.

|    |              |              |              |
|----|--------------|--------------|--------------|
| Sc | 1.385926000  | -0.841882000 | -0.352536000 |
| Si | -5.991301000 | 2.892787000  | -0.515216000 |
| C  | -4.786363000 | 1.406224000  | -0.436993000 |
| C  | -5.082171000 | 4.485713000  | -0.021451000 |
| C  | -7.453133000 | 2.597416000  | 0.656414000  |
| C  | -6.616893000 | 3.045065000  | -2.299066000 |
| C  | -0.880371000 | -2.287556000 | -2.698802000 |
| C  | 0.477614000  | -2.405919000 | -2.071954000 |
| C  | 0.811065000  | -3.183643000 | -0.931824000 |
| C  | 2.233887000  | -3.111665000 | -0.717042000 |
| C  | 2.765740000  | -2.320492000 | -1.796876000 |
| C  | 1.690211000  | -1.876100000 | -2.611685000 |
| C  | -0.175580000 | -4.049235000 | -0.199116000 |
| C  | 4.210782000  | -2.217952000 | -2.198967000 |
| C  | 1.824724000  | -1.200859000 | -3.946167000 |
| C  | -4.185986000 | 1.136589000  | 0.945701000  |
| C  | -3.143642000 | -0.008220000 | 1.066394000  |
| H  | -3.994553000 | 1.591205000  | -1.178572000 |
| H  | -5.340215000 | 0.525744000  | -0.789411000 |
| H  | -4.733013000 | 4.450651000  | 1.016955000  |
| H  | -5.748653000 | 5.351137000  | -0.113557000 |
| H  | -4.213828000 | 4.667879000  | -0.666005000 |
| H  | -7.980734000 | 1.670202000  | 0.404417000  |
| H  | -8.175217000 | 3.419325000  | 0.587883000  |
| H  | -7.131586000 | 2.527883000  | 1.701921000  |
| H  | -5.793148000 | 3.222584000  | -3.000475000 |
| H  | -7.320403000 | 3.880162000  | -2.395101000 |
| H  | -7.137899000 | 2.134306000  | -2.616262000 |

|   |              |              |              |
|---|--------------|--------------|--------------|
| H | -1.683406000 | -2.283303000 | -1.956444000 |
| H | -1.070484000 | -3.135040000 | -3.370731000 |
| H | -0.980694000 | -1.379693000 | -3.303695000 |
| H | -1.207978000 | -3.744438000 | -0.391407000 |
| H | -0.030870000 | -4.064149000 | 0.884188000  |
| H | -0.084638000 | -5.087595000 | -0.544349000 |
| H | 4.454097000  | -3.033568000 | -2.892935000 |
| H | 4.894739000  | -2.307635000 | -1.352313000 |
| H | 4.441656000  | -1.285880000 | -2.724296000 |
| H | 2.719036000  | -0.572677000 | -4.008320000 |
| H | 0.954932000  | -0.585685000 | -4.199506000 |
| H | 1.913501000  | -1.954631000 | -4.740172000 |
| H | -4.994766000 | 0.923338000  | 1.656883000  |
| H | -3.694804000 | 2.048904000  | 1.316427000  |
| H | -2.813965000 | 0.008765000  | 2.114914000  |
| C | 3.081252000  | 1.349701000  | 1.414771000  |
| O | 3.062625000  | 0.461421000  | 0.244778000  |
| C | 4.294367000  | 0.653734000  | -0.522733000 |
| C | 4.961567000  | 1.882828000  | 0.071209000  |
| C | 4.520576000  | 1.814993000  | 1.533350000  |
| H | 2.398243000  | 2.179594000  | 1.212210000  |
| H | 2.726737000  | 0.774972000  | 2.268125000  |
| H | 4.902604000  | -0.243380000 | -0.391113000 |
| H | 4.018932000  | 0.762554000  | -1.573799000 |
| H | 6.047635000  | 1.848223000  | -0.052447000 |
| H | 4.589506000  | 2.795736000  | -0.404462000 |
| H | 5.118109000  | 1.082812000  | 2.088147000  |
| H | 4.591582000  | 2.776523000  | 2.048836000  |
| C | -4.053183000 | -1.855115000 | -0.444594000 |
| C | -3.743196000 | -1.383743000 | 0.838869000  |
| C | -4.027726000 | -2.212713000 | 1.931472000  |
| C | -4.605726000 | -3.468502000 | 1.753511000  |
| C | -4.912772000 | -3.934591000 | 0.477052000  |
| C | -4.628950000 | -3.113337000 | -0.611109000 |
| H | -3.866099000 | -1.244064000 | -1.321412000 |
| H | -3.798978000 | -1.865808000 | 2.936663000  |
| H | -4.821469000 | -4.093015000 | 2.616346000  |
| C | 0.913724000  | -1.409418000 | 2.274453000  |
| C | -0.015745000 | -0.428399000 | 1.833303000  |
| C | -0.124733000 | 0.747391000  | 2.622042000  |
| C | 0.583125000  | 0.869217000  | 3.807195000  |
| C | 1.470221000  | -0.123193000 | 4.254284000  |
| C | 1.631133000  | -1.256114000 | 3.469373000  |
| H | 0.943035000  | -2.376476000 | 1.772177000  |



|    |              |              |              |
|----|--------------|--------------|--------------|
| H  | -0.816693000 | 1.533232000  | 2.339116000  |
| H  | 2.292784000  | -2.050420000 | 3.804736000  |
| C  | -0.696718000 | -0.629547000 | 0.558764000  |
| C  | -1.883789000 | 0.254032000  | 0.205262000  |
| H  | -0.961920000 | -1.686386000 | 0.442916000  |
| H  | -1.629352000 | 1.318457000  | 0.314167000  |
| H  | -2.130979000 | 0.126502000  | -0.855645000 |
| Si | 3.318167000  | -4.181226000 | 0.446317000  |
| C  | 2.317234000  | -5.095252000 | 1.772753000  |
| H  | 1.764622000  | -4.438194000 | 2.452976000  |
| H  | 1.611726000  | -5.811372000 | 1.340974000  |
| H  | 3.027088000  | -5.667307000 | 2.383231000  |
| C  | 4.614054000  | -3.119602000 | 1.351701000  |
| H  | 5.407531000  | -2.757525000 | 0.689593000  |
| H  | 4.160028000  | -2.254391000 | 1.848311000  |
| H  | 5.097891000  | -3.728818000 | 2.124838000  |
| C  | 4.189733000  | -5.486631000 | -0.614101000 |
| H  | 4.857462000  | -5.043589000 | -1.359876000 |
| H  | 4.792340000  | -6.144965000 | 0.022727000  |
| H  | 3.459433000  | -6.109600000 | -1.142368000 |
| C  | 3.528343000  | 5.655288000  | -1.669720000 |
| C  | 3.899287000  | 4.849203000  | -2.743154000 |
| C  | 3.229276000  | 3.653821000  | -2.990832000 |
| C  | 2.172182000  | 3.240651000  | -2.163511000 |
| C  | 1.791337000  | 4.062151000  | -1.088324000 |
| C  | 2.470350000  | 5.250467000  | -0.850339000 |
| H  | 4.711057000  | 5.162790000  | -3.392977000 |
| H  | 3.518521000  | 3.038030000  | -3.839096000 |
| H  | 0.954065000  | 3.797411000  | -0.450886000 |
| C  | 1.492501000  | 1.981449000  | -2.470247000 |
| C  | 0.510665000  | 1.378959000  | -1.765359000 |
| H  | 1.816890000  | 1.509157000  | -3.396170000 |
| H  | -0.023102000 | 0.528192000  | -2.188608000 |
| H  | 0.077486000  | 1.825844000  | -0.875087000 |
| H  | 4.038960000  | 6.592134000  | -1.471640000 |
| H  | 1.995708000  | -0.004949000 | 5.195663000  |
| H  | -5.364739000 | -4.909312000 | 0.325609000  |
| Cl | 0.368342000  | 2.296206000  | 4.777435000  |
| Cl | -5.001488000 | -3.668087000 | -2.225258000 |
| Cl | 1.989325000  | 6.253842000  | 0.483961000  |

$mTS3^a_{syn}$ ,  $E_{(SCF\ Done)} = -3794.035799$  a.u. IF =  $i180.5\text{cm}^{-1}$

|    |              |              |              |
|----|--------------|--------------|--------------|
| Sc | 1.588377000  | -0.527443000 | -0.483894000 |
| Si | -6.737445000 | 2.260556000  | -0.397716000 |

|   |              |              |              |
|---|--------------|--------------|--------------|
| C | -5.204227000 | 1.109814000  | -0.440105000 |
| C | -6.192111000 | 4.042003000  | -0.032024000 |
| C | -7.945772000 | 1.668356000  | 0.938539000  |
| C | -7.567586000 | 2.184003000  | -2.100251000 |
| C | -0.359550000 | -2.439517000 | -2.827951000 |
| C | 0.862314000  | -2.430429000 | -1.955436000 |
| C | 0.944358000  | -2.936542000 | -0.628325000 |
| C | 2.313005000  | -2.877494000 | -0.190311000 |
| C | 3.069989000  | -2.373272000 | -1.305929000 |
| C | 2.183280000  | -2.093206000 | -2.378365000 |
| C | -0.206476000 | -3.600488000 | 0.075759000  |
| C | 4.561915000  | -2.439751000 | -1.477014000 |
| C | 2.606684000  | -1.764328000 | -3.780619000 |
| C | -4.424117000 | 1.028375000  | 0.874105000  |
| C | -3.153572000 | 0.132986000  | 0.896617000  |
| H | -4.559909000 | 1.464682000  | -1.258317000 |
| H | -5.559845000 | 0.113466000  | -0.735925000 |
| H | -5.731868000 | 4.134985000  | 0.958476000  |
| H | -7.055099000 | 4.717545000  | -0.056215000 |
| H | -5.471647000 | 4.401592000  | -0.776328000 |
| H | -8.250530000 | 0.629465000  | 0.766662000  |
| H | -8.852477000 | 2.284370000  | 0.936236000  |
| H | -7.508914000 | 1.730305000  | 1.941844000  |
| H | -6.889088000 | 2.519798000  | -2.893198000 |
| H | -8.454673000 | 2.827222000  | -2.128504000 |
| H | -7.889049000 | 1.164282000  | -2.341784000 |
| H | -1.279228000 | -2.245207000 | -2.266876000 |
| H | -0.484907000 | -3.422337000 | -3.301079000 |
| H | -0.296841000 | -1.705612000 | -3.638166000 |
| H | -1.176580000 | -3.248164000 | -0.285678000 |
| H | -0.193492000 | -3.473523000 | 1.160477000  |
| H | -0.177265000 | -4.681752000 | -0.114415000 |
| H | 4.828968000  | -3.399041000 | -1.940539000 |
| H | 5.102940000  | -2.383916000 | -0.530030000 |
| H | 4.948358000  | -1.659029000 | -2.139115000 |
| H | 3.432614000  | -1.044993000 | -3.816964000 |
| H | 1.785943000  | -1.366298000 | -4.385509000 |
| H | 2.956581000  | -2.673007000 | -4.288755000 |
| H | -5.087812000 | 0.668015000  | 1.670571000  |
| H | -4.108585000 | 2.036984000  | 1.178525000  |
| H | -2.730198000 | 0.254223000  | 1.903673000  |
| C | 3.363771000  | 1.563451000  | 1.346783000  |
| O | 3.333785000  | 0.603195000  | 0.235110000  |
| C | 4.602346000  | 0.683318000  | -0.495341000 |

|    |              |              |              |
|----|--------------|--------------|--------------|
| C  | 5.252424000  | 1.971657000  | -0.030771000 |
| C  | 4.801938000  | 2.045059000  | 1.427712000  |
| H  | 2.677475000  | 2.376109000  | 1.097538000  |
| H  | 3.017811000  | 1.042953000  | 2.238273000  |
| H  | 5.191617000  | -0.192710000 | -0.219520000 |
| H  | 4.372455000  | 0.664674000  | -1.561968000 |
| H  | 6.339741000  | 1.936259000  | -0.143641000 |
| H  | 4.870278000  | 2.822899000  | -0.602307000 |
| H  | 5.401957000  | 1.376371000  | 2.055183000  |
| H  | 4.861944000  | 3.053442000  | 1.845807000  |
| C  | -3.751670000 | -1.916909000 | -0.507345000 |
| C  | -3.485508000 | -1.340240000 | 0.742356000  |
| C  | -3.586163000 | -2.152356000 | 1.879512000  |
| C  | -3.943808000 | -3.495417000 | 1.776358000  |
| C  | -4.207038000 | -4.066891000 | 0.533034000  |
| C  | -4.106580000 | -3.262380000 | -0.599214000 |
| H  | -3.707149000 | -1.326254000 | -1.416646000 |
| H  | -3.392685000 | -1.722273000 | 2.859728000  |
| H  | -4.022959000 | -4.105862000 | 2.671973000  |
| C  | 0.637796000  | -0.634640000 | 2.114319000  |
| C  | -0.058365000 | 0.364890000  | 1.393923000  |
| C  | -0.115169000 | 1.662156000  | 1.965033000  |
| C  | 0.428846000  | 1.902319000  | 3.216005000  |
| C  | 1.087180000  | 0.894667000  | 3.941153000  |
| C  | 1.198170000  | -0.363925000 | 3.372247000  |
| H  | 0.592077000  | -1.666894000 | 1.777725000  |
| H  | -0.637076000 | 2.465476000  | 1.455816000  |
| H  | 1.682617000  | -1.162515000 | 3.926947000  |
| C  | -0.702752000 | 0.042607000  | 0.111526000  |
| C  | -2.091423000 | 0.638283000  | -0.102509000 |
| H  | -0.752514000 | -1.047360000 | -0.025729000 |
| H  | -2.050829000 | 1.732631000  | -0.016591000 |
| H  | -2.426282000 | 0.440246000  | -1.126148000 |
| Si | 3.119917000  | -3.716376000 | 1.331375000  |
| C  | 1.865256000  | -4.313787000 | 2.625430000  |
| H  | 1.230222000  | -3.527102000 | 3.047393000  |
| H  | 1.215499000  | -5.102750000 | 2.234433000  |
| H  | 2.435211000  | -4.747603000 | 3.456607000  |
| C  | 4.326966000  | -2.544563000 | 2.220673000  |
| H  | 5.209574000  | -2.303702000 | 1.619349000  |
| H  | 3.845267000  | -1.603782000 | 2.508706000  |
| H  | 4.685969000  | -3.029200000 | 3.136779000  |
| C  | 4.056299000  | -5.245828000 | 0.718764000  |
| H  | 4.870967000  | -4.992925000 | 0.032996000  |

|    |              |              |              |
|----|--------------|--------------|--------------|
| H  | 4.492447000  | -5.782315000 | 1.569810000  |
| H  | 3.380828000  | -5.935427000 | 0.200290000  |
| C  | 3.498233000  | 4.744232000  | -2.257602000 |
| C  | 3.806431000  | 3.729543000  | -3.163633000 |
| C  | 3.117514000  | 2.520244000  | -3.143515000 |
| C  | 2.083472000  | 2.290090000  | -2.217347000 |
| C  | 1.782826000  | 3.311295000  | -1.299805000 |
| C  | 2.482188000  | 4.514541000  | -1.330985000 |
| H  | 4.585147000  | 3.894054000  | -3.903515000 |
| H  | 3.349676000  | 1.758955000  | -3.884845000 |
| H  | 0.990607000  | 3.185839000  | -0.567460000 |
| C  | 1.305415000  | 1.041413000  | -2.299320000 |
| C  | -0.016379000 | 0.942903000  | -1.852730000 |
| H  | 1.605630000  | 0.364998000  | -3.094297000 |
| H  | -0.666341000 | 0.217341000  | -2.330624000 |
| H  | -0.518904000 | 1.839259000  | -1.504614000 |
| H  | 4.024289000  | 5.692782000  | -2.271921000 |
| H  | 1.481374000  | 1.105279000  | 4.929769000  |
| H  | -4.489413000 | -5.110409000 | 0.440608000  |
| Cl | 0.287978000  | 3.483159000  | 3.916002000  |
| Cl | -4.430826000 | -3.947781000 | -2.170990000 |
| Cl | 2.075387000  | 5.756399000  | -0.178287000 |

**$mP3^a_{syn}$** ,  $E_{(SCF Done)} = -3794.076087$  a.u.

|    |              |              |              |
|----|--------------|--------------|--------------|
| Sc | -2.132723000 | 0.370351000  | -0.419032000 |
| Si | 7.579512000  | -1.881931000 | -0.132962000 |
| C  | 5.873703000  | -1.049176000 | -0.393213000 |
| C  | 7.335636000  | -3.692767000 | 0.382395000  |
| C  | 8.551026000  | -0.956769000 | 1.208291000  |
| C  | 8.519954000  | -1.808037000 | -1.777522000 |
| C  | -1.365441000 | 2.155135000  | -3.458953000 |
| C  | -2.035141000 | 2.188320000  | -2.117884000 |
| C  | -1.470891000 | 2.699029000  | -0.920341000 |
| C  | -2.493561000 | 2.750234000  | 0.095804000  |
| C  | -3.699622000 | 2.271501000  | -0.522137000 |
| C  | -3.415111000 | 1.905691000  | -1.867403000 |
| C  | -0.074494000 | 3.248452000  | -0.834370000 |
| C  | -5.075194000 | 2.278933000  | 0.085300000  |
| C  | -4.418337000 | 1.504489000  | -2.912239000 |
| C  | 4.974449000  | -1.022772000 | 0.844921000  |
| C  | 3.582590000  | -0.348105000 | 0.686590000  |
| H  | 5.382630000  | -1.580991000 | -1.220954000 |
| H  | 6.060368000  | -0.027156000 | -0.751314000 |
| H  | 6.815565000  | -3.778380000 | 1.343522000  |

|   |               |               |               |
|---|---------------|---------------|---------------|
| H | 8. 304065000  | -4. 195492000 | 0. 488037000  |
| H | 6. 756610000  | -4. 246241000 | -0. 366379000 |
| H | 8. 682404000  | 0. 099650000  | 0. 946753000  |
| H | 9. 548364000  | -1. 394804000 | 1. 331287000  |
| H | 8. 049339000  | -1. 003517000 | 2. 181701000  |
| H | 7. 979546000  | -2. 337118000 | -2. 571154000 |
| H | 9. 508248000  | -2. 272426000 | -1. 682205000 |
| H | 8. 669561000  | -0. 772810000 | -2. 105288000 |
| H | -0. 289795000 | 1. 969752000  | -3. 384673000 |
| H | -1. 490059000 | 3. 122153000  | -3. 964559000 |
| H | -1. 790358000 | 1. 394197000  | -4. 120805000 |
| H | 0. 616320000  | 2. 729316000  | -1. 505356000 |
| H | 0. 346917000  | 3. 206404000  | 0. 172060000  |
| H | -0. 066363000 | 4. 304835000  | -1. 135797000 |
| H | -5. 383012000 | 3. 304311000  | 0. 323663000  |
| H | -5. 143633000 | 1. 702306000  | 1. 013357000  |
| H | -5. 821496000 | 1. 885937000  | -0. 610780000 |
| H | -5. 242705000 | 0. 911649000  | -2. 505847000 |
| H | -3. 964621000 | 0. 921915000  | -3. 717919000 |
| H | -4. 861074000 | 2. 398017000  | -3. 372272000 |
| H | 5. 494458000  | -0. 509792000 | 1. 664437000  |
| H | 4. 796460000  | -2. 049775000 | 1. 195159000  |
| H | 3. 090479000  | -0. 463102000 | 1. 664061000  |
| C | -3. 996085000 | -0. 988588000 | 1. 931471000  |
| O | -3. 777581000 | -0. 758779000 | 0. 500842000  |
| C | -4. 907497000 | -1. 309434000 | -0. 258889000 |
| C | -5. 604970000 | -2. 243091000 | 0. 711442000  |
| C | -5. 417115000 | -1. 518037000 | 2. 045278000  |
| H | -3. 255215000 | -1. 721795000 | 2. 259072000  |
| H | -3. 831046000 | -0. 041922000 | 2. 451073000  |
| H | -5. 547568000 | -0. 470463000 | -0. 547411000 |
| H | -4. 501868000 | -1. 796712000 | -1. 145053000 |
| H | -6. 656417000 | -2. 387954000 | 0. 448604000  |
| H | -5. 113965000 | -3. 221660000 | 0. 723704000  |
| H | -6. 132936000 | -0. 694234000 | 2. 143085000  |
| H | -5. 532582000 | -2. 174663000 | 2. 911866000  |
| C | 3. 854996000  | 1. 689890000  | -0. 836914000 |
| C | 3. 710317000  | 1. 146274000  | 0. 445893000  |
| C | 3. 740688000  | 2. 020131000  | 1. 541438000  |
| C | 3. 919808000  | 3. 390617000  | 1. 366063000  |
| C | 4. 062854000  | 3. 929268000  | 0. 088445000  |
| C | 4. 025259000  | 3. 063658000  | -1. 001388000 |
| H | 3. 847416000  | 1. 054647000  | -1. 716798000 |
| H | 3. 637386000  | 1. 616385000  | 2. 546584000  |

|    |              |              |              |
|----|--------------|--------------|--------------|
| H  | 3.952312000  | 4.048932000  | 2.230274000  |
| C  | -0.171346000 | 0.309529000  | 1.459626000  |
| C  | 0.505238000  | -0.778137000 | 0.875576000  |
| C  | 0.473007000  | -2.009308000 | 1.545680000  |
| C  | -0.163651000 | -2.126644000 | 2.779803000  |
| C  | -0.799169000 | -1.034299000 | 3.380114000  |
| C  | -0.802067000 | 0.181474000  | 2.708815000  |
| H  | -0.051362000 | 1.303127000  | 1.026243000  |
| H  | 0.979340000  | -2.875051000 | 1.129935000  |
| H  | -1.256733000 | 1.050873000  | 3.174281000  |
| C  | 1.248876000  | -0.621295000 | -0.434381000 |
| C  | 2.715724000  | -1.082582000 | -0.346772000 |
| H  | 1.251346000  | 0.448806000  | -0.683596000 |
| H  | 2.749635000  | -2.158104000 | -0.122272000 |
| H  | 3.151979000  | -0.986848000 | -1.348152000 |
| Si | -2.475014000 | 3.821299000  | 1.683972000  |
| C  | -0.745068000 | 4.097461000  | 2.416894000  |
| H  | -0.181962000 | 3.182084000  | 2.628127000  |
| H  | -0.127829000 | 4.735716000  | 1.777339000  |
| H  | -0.871830000 | 4.625018000  | 3.370543000  |
| C  | -3.569795000 | 3.107874000  | 3.066755000  |
| H  | -4.631747000 | 3.110997000  | 2.804331000  |
| H  | -3.294844000 | 2.088586000  | 3.362122000  |
| H  | -3.455154000 | 3.741028000  | 3.955069000  |
| C  | -3.163557000 | 5.514575000  | 1.183855000  |
| H  | -4.185431000 | 5.446367000  | 0.795736000  |
| H  | -3.177949000 | 6.190162000  | 2.047249000  |
| H  | -2.541671000 | 5.974436000  | 0.407902000  |
| C  | -3.834296000 | -3.990801000 | -2.659148000 |
| C  | -3.720528000 | -2.888006000 | -3.505398000 |
| C  | -2.788573000 | -1.883827000 | -3.250926000 |
| C  | -1.920881000 | -1.943044000 | -2.138495000 |
| C  | -2.058491000 | -3.057305000 | -1.280556000 |
| C  | -2.991099000 | -4.053578000 | -1.549459000 |
| H  | -4.351630000 | -2.826547000 | -4.388257000 |
| H  | -2.685054000 | -1.062428000 | -3.955457000 |
| H  | -1.419105000 | -3.161281000 | -0.408467000 |
| C  | -0.923950000 | -0.868644000 | -1.874457000 |
| C  | 0.499620000  | -1.371636000 | -1.551065000 |
| H  | -0.872150000 | -0.236681000 | -2.766187000 |
| H  | 1.116131000  | -1.318601000 | -2.459685000 |
| H  | 0.471380000  | -2.436644000 | -1.286147000 |
| H  | -4.543584000 | -4.786889000 | -2.858723000 |
| H  | -1.257025000 | -1.139971000 | 4.358344000  |

|    |              |              |              |
|----|--------------|--------------|--------------|
| H  | 4.205498000  | 4.994389000  | -0.061946000 |
| Cl | -0.154937000 | -3.653215000 | 3.598466000  |
| Cl | 4.192359000  | 3.708999000  | -2.615437000 |
| Cl | -3.107776000 | -5.416381000 | -0.464470000 |

***mC3***<sup>a</sup><sub>iso</sub>,  $E_{(\text{SCF Done})} = -3794.047194$  a.u.

|    |              |              |              |
|----|--------------|--------------|--------------|
| Sc | 1.819089000  | 0.143676000  | 0.039427000  |
| Si | -6.386479000 | -0.513782000 | 1.433990000  |
| C  | -4.661328000 | -0.872518000 | 0.681393000  |
| C  | -6.195181000 | 0.340322000  | 3.119195000  |
| C  | -7.345294000 | -2.136860000 | 1.637460000  |
| C  | -7.310755000 | 0.633972000  | 0.239947000  |
| C  | -0.300577000 | 1.021421000  | -2.652996000 |
| C  | 1.117442000  | 0.744791000  | -2.248056000 |
| C  | 1.775905000  | -0.511710000 | -2.326034000 |
| C  | 3.156915000  | -0.341782000 | -1.943508000 |
| C  | 3.326078000  | 1.061238000  | -1.669442000 |
| C  | 2.078079000  | 1.719363000  | -1.836117000 |
| C  | 1.132541000  | -1.757327000 | -2.865587000 |
| C  | 4.615209000  | 1.808346000  | -1.466027000 |
| C  | 1.881305000  | 3.204970000  | -1.773789000 |
| C  | -3.754315000 | -1.770102000 | 1.527397000  |
| C  | -2.357688000 | -2.118209000 | 0.943084000  |
| H  | -4.182388000 | 0.099819000  | 0.492508000  |
| H  | -4.835133000 | -1.327711000 | -0.303182000 |
| H  | -5.694567000 | -0.306391000 | 3.848931000  |
| H  | -7.177730000 | 0.599725000  | 3.530182000  |
| H  | -5.616721000 | 1.268122000  | 3.035033000  |
| H  | -7.436021000 | -2.664061000 | 0.680670000  |
| H  | -8.358691000 | -1.943020000 | 2.007672000  |
| H  | -6.858271000 | -2.812610000 | 2.349678000  |
| H  | -6.780605000 | 1.583949000  | 0.103747000  |
| H  | -8.313011000 | 0.865048000  | 0.618915000  |
| H  | -7.427925000 | 0.170100000  | -0.746324000 |
| H  | -0.983193000 | 0.222372000  | -2.348203000 |
| H  | -0.378327000 | 1.108790000  | -3.744658000 |
| H  | -0.670228000 | 1.961904000  | -2.233784000 |
| H  | 0.041409000  | -1.696978000 | -2.837368000 |
| H  | 1.427006000  | -2.664343000 | -2.331036000 |
| H  | 1.412840000  | -1.901496000 | -3.917247000 |
| H  | 4.870102000  | 2.360374000  | -2.380685000 |
| H  | 5.457365000  | 1.145513000  | -1.255824000 |
| H  | 4.555815000  | 2.553895000  | -0.663651000 |
| H  | 2.437535000  | 3.663833000  | -0.949359000 |

|    |              |              |              |
|----|--------------|--------------|--------------|
| H  | 0.831588000  | 3.483402000  | -1.659200000 |
| H  | 2.240626000  | 3.671143000  | -2.701472000 |
| H  | -4.267137000 | -2.719273000 | 1.731503000  |
| H  | -3.586964000 | -1.301548000 | 2.508380000  |
| H  | -1.858482000 | -2.725796000 | 1.712035000  |
| C  | 2.660032000  | 1.467525000  | 2.997603000  |
| O  | 3.080117000  | 0.862005000  | 1.729655000  |
| C  | 4.508719000  | 0.543402000  | 1.804984000  |
| C  | 5.041244000  | 1.416478000  | 2.923951000  |
| C  | 3.874415000  | 1.400756000  | 3.912757000  |
| H  | 2.368191000  | 2.497192000  | 2.776904000  |
| H  | 1.803801000  | 0.904892000  | 3.375651000  |
| H  | 4.600471000  | -0.520665000 | 2.039147000  |
| H  | 4.938568000  | 0.746695000  | 0.825887000  |
| H  | 5.966404000  | 1.016249000  | 3.347621000  |
| H  | 5.239713000  | 2.432496000  | 2.563781000  |
| H  | 3.869466000  | 0.469950000  | 4.489310000  |
| H  | 3.893911000  | 2.236884000  | 4.616964000  |
| C  | -2.723952000 | -2.465331000 | -1.561792000 |
| C  | -2.450996000 | -2.994563000 | -0.293172000 |
| C  | -2.296807000 | -4.381907000 | -0.177389000 |
| C  | -2.415826000 | -5.215980000 | -1.287343000 |
| C  | -2.685487000 | -4.687020000 | -2.547825000 |
| C  | -2.835478000 | -3.308104000 | -2.665964000 |
| H  | -2.865778000 | -1.398507000 | -1.701519000 |
| H  | -2.086322000 | -4.814534000 | 0.798176000  |
| H  | -2.296951000 | -6.290194000 | -1.173454000 |
| C  | 2.084855000  | -2.318770000 | 0.964978000  |
| C  | 0.851315000  | -1.746356000 | 1.393672000  |
| C  | 0.676038000  | -1.585227000 | 2.796534000  |
| C  | 1.644585000  | -2.029263000 | 3.682179000  |
| C  | 2.839502000  | -2.628935000 | 3.252475000  |
| C  | 3.040775000  | -2.770274000 | 1.887857000  |
| H  | 2.206313000  | -2.578123000 | -0.086871000 |
| H  | -0.246939000 | -1.168295000 | 3.186479000  |
| H  | 3.935249000  | -3.272822000 | 1.528430000  |
| C  | -0.032045000 | -1.176080000 | 0.397044000  |
| C  | -1.479004000 | -0.862144000 | 0.739228000  |
| H  | 0.037373000  | -1.730743000 | -0.544469000 |
| H  | -1.552705000 | -0.254764000 | 1.652301000  |
| H  | -1.912340000 | -0.239443000 | -0.052678000 |
| Si | 4.600041000  | -1.555949000 | -2.295423000 |
| C  | 4.027069000  | -3.340167000 | -2.586090000 |
| H  | 3.491313000  | -3.778929000 | -1.736789000 |



|    |              |              |              |
|----|--------------|--------------|--------------|
| H  | 3.400132000  | -3.441779000 | -3.476302000 |
| H  | 4.924692000  | -3.949830000 | -2.748922000 |
| C  | 5.875736000  | -1.639482000 | -0.886246000 |
| H  | 6.426606000  | -0.707413000 | -0.724355000 |
| H  | 5.419807000  | -1.940507000 | 0.063052000  |
| H  | 6.617074000  | -2.404637000 | -1.147327000 |
| C  | 5.452032000  | -0.937441000 | -3.870155000 |
| H  | 5.862438000  | 0.070488000  | -3.747742000 |
| H  | 6.278336000  | -1.605231000 | -4.140746000 |
| H  | 4.750389000  | -0.913816000 | -4.711283000 |
| C  | -1.515903000 | 6.784880000  | -0.891865000 |
| C  | -0.471771000 | 6.952392000  | 0.014378000  |
| C  | 0.014661000  | 5.867643000  | 0.737925000  |
| C  | -0.528942000 | 4.586340000  | 0.556257000  |
| C  | -1.593627000 | 4.421473000  | -0.345840000 |
| C  | -2.071008000 | 5.513926000  | -1.059222000 |
| H  | -0.042300000 | 7.939393000  | 0.159229000  |
| H  | 0.825474000  | 6.011597000  | 1.447917000  |
| H  | -2.073508000 | 3.456255000  | -0.469802000 |
| C  | 0.017077000  | 3.467758000  | 1.325866000  |
| C  | -0.176519000 | 2.151280000  | 1.109759000  |
| H  | 0.628372000  | 3.766419000  | 2.177897000  |
| H  | 0.146420000  | 1.425908000  | 1.855256000  |
| H  | -0.810958000 | 1.777806000  | 0.311114000  |
| H  | -1.908356000 | 7.625791000  | -1.454214000 |
| H  | -2.779498000 | -5.326008000 | -3.419629000 |
| H  | 3.559023000  | -2.997286000 | 3.975659000  |
| Cl | -3.392431000 | 5.295777000  | -2.167270000 |
| Cl | 1.370706000  | -1.846889000 | 5.391387000  |
| Cl | -3.168192000 | -2.610806000 | -4.233285000 |

***mTS3***<sup>a</sup><sub>iso</sub>,  $E_{(\text{SCF Done})} = -3794.028236$  a.u.  $\text{IF} = i253.3$   $\text{cm}^{-1}$

|    |              |              |              |
|----|--------------|--------------|--------------|
| Sc | -1.789184000 | 0.297950000  | -0.401553000 |
| Si | 6.765828000  | -1.385190000 | -0.943295000 |
| C  | 5.014806000  | -0.917609000 | -0.316144000 |
| C  | 6.638797000  | -2.212529000 | -2.647535000 |
| C  | 7.588331000  | -2.571883000 | 0.286464000  |
| C  | 7.775916000  | 0.212896000  | -1.074894000 |
| C  | -0.265773000 | 2.910016000  | 1.519064000  |
| C  | -1.509580000 | 2.102882000  | 1.290352000  |
| C  | -1.854489000 | 0.915340000  | 1.989924000  |
| C  | -3.199298000 | 0.529412000  | 1.631171000  |
| C  | -3.653912000 | 1.518201000  | 0.691999000  |
| C  | -2.623449000 | 2.477666000  | 0.482278000  |

|   |              |              |              |
|---|--------------|--------------|--------------|
| C | -0.985334000 | 0.329713000  | 3.069465000  |
| C | -5.045695000 | 1.715776000  | 0.155433000  |
| C | -2.825062000 | 3.782874000  | -0.224695000 |
| C | 4.048153000  | -2.093304000 | -0.159493000 |
| C | 2.611514000  | -1.771928000 | 0.340608000  |
| H | 4.613028000  | -0.168879000 | -1.014839000 |
| H | 5.148135000  | -0.403015000 | 0.645132000  |
| H | 6.065390000  | -3.145828000 | -2.605351000 |
| H | 7.637053000  | -2.457899000 | -3.028170000 |
| H | 6.159724000  | -1.552304000 | -3.380211000 |
| H | 7.657555000  | -2.124600000 | 1.284881000  |
| H | 8.606338000  | -2.816301000 | -0.038436000 |
| H | 7.037205000  | -3.515006000 | 0.377023000  |
| H | 7.323278000  | 0.917036000  | -1.782700000 |
| H | 8.794552000  | 0.002761000  | -1.420685000 |
| H | 7.851449000  | 0.714860000  | -0.103362000 |
| H | 0.634930000  | 2.291811000  | 1.596048000  |
| H | -0.346710000 | 3.460014000  | 2.466096000  |
| H | -0.100291000 | 3.643125000  | 0.727517000  |
| H | 0.076550000  | 0.526133000  | 2.894650000  |
| H | -1.103144000 | -0.748541000 | 3.193389000  |
| H | -1.231128000 | 0.787347000  | 4.037451000  |
| H | -5.469398000 | 2.646525000  | 0.555007000  |
| H | -5.725623000 | 0.911389000  | 0.443495000  |
| H | -5.072756000 | 1.809816000  | -0.937404000 |
| H | -3.363445000 | 3.668349000  | -1.171107000 |
| H | -1.885348000 | 4.293408000  | -0.438216000 |
| H | -3.427132000 | 4.451051000  | 0.406971000  |
| H | 4.474203000  | -2.827697000 | 0.536175000  |
| H | 3.942540000  | -2.615358000 | -1.121526000 |
| H | 2.078511000  | -2.733378000 | 0.339491000  |
| C | -2.941228000 | -0.944509000 | -3.328448000 |
| O | -3.169623000 | -0.635485000 | -1.910962000 |
| C | -4.431951000 | -1.255369000 | -1.521041000 |
| C | -5.272430000 | -1.198487000 | -2.778287000 |
| C | -4.241456000 | -1.560889000 | -3.851448000 |
| H | -2.691379000 | -0.005120000 | -3.825618000 |
| H | -2.095053000 | -1.632008000 | -3.395453000 |
| H | -4.225093000 | -2.285577000 | -1.213578000 |
| H | -4.816707000 | -0.690893000 | -0.675735000 |
| H | -6.113543000 | -1.896342000 | -2.745619000 |
| H | -5.668160000 | -0.188031000 | -2.929875000 |
| H | -4.142770000 | -2.647903000 | -3.932782000 |
| H | -4.501113000 | -1.173119000 | -4.839825000 |

|    |               |               |               |
|----|---------------|---------------|---------------|
| C  | 2. 907665000  | 0. 051960000  | 2. 107389000  |
| C  | 2. 601181000  | -1. 275134000 | 1. 775298000  |
| C  | 2. 335412000  | -2. 173395000 | 2. 817200000  |
| C  | 2. 382766000  | -1. 766051000 | 4. 149098000  |
| C  | 2. 692790000  | -0. 447909000 | 4. 477556000  |
| C  | 2. 952265000  | 0. 448695000  | 3. 443850000  |
| H  | 3. 135177000  | 0. 783134000  | 1. 338322000  |
| H  | 2. 102894000  | -3. 209452000 | 2. 580906000  |
| H  | 2. 181809000  | -2. 481062000 | 4. 942457000  |
| C  | -1. 427411000 | -2. 271157000 | 0. 489013000  |
| C  | -0. 421508000 | -1. 987854000 | -0. 462179000 |
| C  | -0. 269842000 | -2. 888353000 | -1. 547503000 |
| C  | -1. 078414000 | -4. 008495000 | -1. 644824000 |
| C  | -2. 076454000 | -4. 285564000 | -0. 696198000 |
| C  | -2. 239440000 | -3. 409394000 | 0. 363767000  |
| H  | -1. 478075000 | -1. 693073000 | 1. 406490000  |
| H  | 0. 507229000  | -2. 732382000 | -2. 288914000 |
| H  | -2. 973316000 | -3. 630037000 | 1. 133617000  |
| C  | 0. 365421000  | -0. 750528000 | -0. 378947000 |
| C  | 1. 863457000  | -0. 849376000 | -0. 643277000 |
| H  | 0. 217485000  | -0. 254370000 | 0. 601726000  |
| H  | 2. 041758000  | -1. 229294000 | -1. 658953000 |
| H  | 2. 301725000  | 0. 154909000  | -0. 622325000 |
| Si | -4. 372949000 | -0. 533699000 | 2. 719859000  |
| C  | -3. 463277000 | -1. 734956000 | 3. 874661000  |
| H  | -2. 806294000 | -2. 446788000 | 3. 362276000  |
| H  | -2. 875108000 | -1. 214944000 | 4. 636148000  |
| H  | -4. 225198000 | -2. 323159000 | 4. 401430000  |
| C  | -5. 643302000 | -1. 591900000 | 1. 777618000  |
| H  | -6. 337636000 | -1. 019033000 | 1. 154553000  |
| H  | -5. 178933000 | -2. 366361000 | 1. 158414000  |
| H  | -6. 251488000 | -2. 105997000 | 2. 532321000  |
| C  | -5. 313218000 | 0. 716828000  | 3. 788461000  |
| H  | -5. 923183000 | 1. 391775000  | 3. 178458000  |
| H  | -5. 981050000 | 0. 201926000  | 4. 489019000  |
| H  | -4. 619872000 | 1. 330733000  | 4. 374015000  |
| C  | 0. 764492000  | 5. 520984000  | -2. 575606000 |
| C  | -0. 458424000 | 5. 195919000  | -3. 160008000 |
| C  | -1. 002230000 | 3. 923255000  | -3. 016001000 |
| C  | -0. 334764000 | 2. 930944000  | -2. 278729000 |
| C  | 0. 898247000  | 3. 259886000  | -1. 694990000 |
| C  | 1. 430386000  | 4. 537059000  | -1. 847901000 |
| H  | -0. 987700000 | 5. 945573000  | -3. 741825000 |
| H  | -1. 947962000 | 3. 687274000  | -3. 498468000 |

|    |              |              |              |
|----|--------------|--------------|--------------|
| H  | 1.448823000  | 2.530907000  | -1.108779000 |
| C  | -0.887332000 | 1.563928000  | -2.228774000 |
| C  | -0.042984000 | 0.440102000  | -2.201582000 |
| H  | -1.857158000 | 1.460324000  | -2.721468000 |
| H  | -0.349878000 | -0.472942000 | -2.709719000 |
| H  | 1.024127000  | 0.622426000  | -2.254700000 |
| H  | 1.196536000  | 6.509942000  | -2.684268000 |
| H  | 2.738532000  | -0.120266000 | 5.510932000  |
| H  | -2.675649000 | -5.185792000 | -0.784331000 |
| Cl | 2.961444000  | 4.905641000  | -1.102499000 |
| Cl | -0.852078000 | -5.108013000 | -2.970339000 |
| Cl | 3.343589000  | 2.105608000  | 3.823736000  |

***mP3***<sub>iso</sub>,  $E_{(\text{SCF Done})} = -3794.06801$  a.u.

|    |              |              |              |
|----|--------------|--------------|--------------|
| Sc | -2.299803000 | 0.121723000  | -0.513012000 |
| Si | 7.567618000  | -1.339127000 | -0.951530000 |
| C  | 5.801149000  | -0.758396000 | -0.489782000 |
| C  | 7.511758000  | -2.338891000 | -2.564898000 |
| C  | 8.278120000  | -2.409872000 | 0.444012000  |
| C  | 8.640332000  | 0.205331000  | -1.193242000 |
| C  | -2.415787000 | 3.592422000  | 0.484920000  |
| C  | -3.117972000 | 2.270855000  | 0.419734000  |
| C  | -3.153594000 | 1.305853000  | 1.466507000  |
| C  | -4.139200000 | 0.301336000  | 1.148005000  |
| C  | -4.673839000 | 0.662111000  | -0.134602000 |
| C  | -4.040785000 | 1.855511000  | -0.585505000 |
| C  | -2.384847000 | 1.466571000  | 2.750167000  |
| C  | -5.833973000 | 0.028425000  | -0.850243000 |
| C  | -4.421528000 | 2.627720000  | -1.814776000 |
| C  | 4.804283000  | -1.885282000 | -0.210219000 |
| C  | 3.358033000  | -1.470254000 | 0.181698000  |
| H  | 5.451132000  | -0.115551000 | -1.310644000 |
| H  | 5.893710000  | -0.109245000 | 0.391511000  |
| H  | 6.912145000  | -3.250593000 | -2.460202000 |
| H  | 8.521736000  | -2.642587000 | -2.863653000 |
| H  | 7.088075000  | -1.747377000 | -3.385149000 |
| H  | 8.296975000  | -1.863356000 | 1.394069000  |
| H  | 9.307028000  | -2.709219000 | 0.212987000  |
| H  | 7.694764000  | -3.325812000 | 0.592869000  |
| H  | 8.246328000  | 0.842896000  | -1.993256000 |
| H  | 9.667007000  | -0.068869000 | -1.462166000 |
| H  | 8.685677000  | 0.805741000  | -0.277280000 |
| H  | -1.419231000 | 3.523934000  | 0.929093000  |
| H  | -3.001958000 | 4.281183000  | 1.108908000  |

|   |              |              |              |
|---|--------------|--------------|--------------|
| H | -2.301441000 | 4.052785000  | -0.497938000 |
| H | -1.444322000 | 2.005100000  | 2.592415000  |
| H | -2.153317000 | 0.514144000  | 3.232724000  |
| H | -2.960995000 | 2.058824000  | 3.473448000  |
| H | -6.734586000 | 0.645442000  | -0.733604000 |
| H | -6.074277000 | -0.964067000 | -0.461856000 |
| H | -5.661285000 | -0.063718000 | -1.928921000 |
| H | -4.706797000 | 1.973559000  | -2.646789000 |
| H | -3.611939000 | 3.276577000  | -2.156449000 |
| H | -5.289796000 | 3.267506000  | -1.606074000 |
| H | 5.189389000  | -2.517256000 | 0.600559000  |
| H | 4.724973000  | -2.538778000 | -1.091256000 |
| H | 2.828226000  | -2.416713000 | 0.363389000  |
| C | -2.835456000 | -1.289035000 | -3.423833000 |
| O | -2.913638000 | -1.409668000 | -1.960176000 |
| C | -3.647884000 | -2.629622000 | -1.614556000 |
| C | -4.405971000 | -2.999838000 | -2.874640000 |
| C | -3.421260000 | -2.583550000 | -3.969175000 |
| H | -3.425173000 | -0.412573000 | -3.709138000 |
| H | -1.789548000 | -1.130659000 | -3.691895000 |
| H | -2.912551000 | -3.391279000 | -1.342227000 |
| H | -4.274732000 | -2.397318000 | -0.753522000 |
| H | -4.649986000 | -4.065201000 | -2.903271000 |
| H | -5.339111000 | -2.431117000 | -2.948558000 |
| H | -2.638063000 | -3.339680000 | -4.090537000 |
| H | -3.898416000 | -2.430639000 | -4.940825000 |
| C | 3.547438000  | 0.667385000  | 1.577128000  |
| C | 3.314633000  | -0.712040000 | 1.496450000  |
| C | 3.072118000  | -1.414188000 | 2.684793000  |
| C | 3.066168000  | -0.765114000 | 3.917492000  |
| C | 3.297093000  | 0.606518000  | 3.995666000  |
| C | 3.536110000  | 1.307613000  | 2.815963000  |
| H | 3.749094000  | 1.252479000  | 0.685007000  |
| H | 2.897131000  | -2.487235000 | 2.642462000  |
| H | 2.884965000  | -1.329955000 | 4.828221000  |
| C | -0.530684000 | -1.056119000 | 0.987966000  |
| C | 0.314939000  | -1.372647000 | -0.092804000 |
| C | 0.289214000  | -2.683659000 | -0.589439000 |
| C | -0.520357000 | -3.647911000 | 0.007293000  |
| C | -1.347853000 | -3.339397000 | 1.091152000  |
| C | -1.350905000 | -2.034970000 | 1.573895000  |
| H | -0.437175000 | -0.078944000 | 1.466258000  |
| H | 0.926890000  | -2.966526000 | -1.421341000 |
| H | -1.960123000 | -1.783936000 | 2.435394000  |

|    |              |              |              |
|----|--------------|--------------|--------------|
| C  | 1.192056000  | -0.312307000 | -0.717550000 |
| C  | 2.638351000  | -0.770792000 | -0.984086000 |
| H  | 1.236356000  | 0.518446000  | -0.004188000 |
| H  | 2.660404000  | -1.447241000 | -1.851269000 |
| H  | 3.197176000  | 0.118201000  | -1.300851000 |
| Si | -5.073020000 | -0.830360000 | 2.387004000  |
| C  | -4.262435000 | -0.925791000 | 4.100165000  |
| H  | -3.282668000 | -1.414392000 | 4.127019000  |
| H  | -4.165869000 | 0.058261000  | 4.568252000  |
| H  | -4.930458000 | -1.521741000 | 4.734719000  |
| C  | -5.310534000 | -2.620771000 | 1.787505000  |
| H  | -5.963100000 | -2.700446000 | 0.911304000  |
| H  | -4.363499000 | -3.122783000 | 1.561419000  |
| H  | -5.794429000 | -3.187782000 | 2.592201000  |
| C  | -6.776559000 | -0.036943000 | 2.630528000  |
| H  | -7.360997000 | -0.005205000 | 1.705531000  |
| H  | -7.353119000 | -0.605212000 | 3.369989000  |
| H  | -6.675856000 | 0.989227000  | 3.000977000  |
| C  | 0.153342000  | 5.295039000  | -2.214254000 |
| C  | -0.763009000 | 4.682574000  | -3.066364000 |
| C  | -1.053438000 | 3.325695000  | -2.943129000 |
| C  | -0.453826000 | 2.530125000  | -1.950038000 |
| C  | 0.479054000  | 3.153920000  | -1.104632000 |
| C  | 0.770947000  | 4.508813000  | -1.244744000 |
| H  | -1.239566000 | 5.268564000  | -3.848140000 |
| H  | -1.740253000 | 2.864324000  | -3.650229000 |
| H  | 0.981016000  | 2.595318000  | -0.321121000 |
| C  | -0.758863000 | 1.066229000  | -1.857039000 |
| C  | 0.523710000  | 0.197756000  | -2.016674000 |
| H  | -1.390691000 | 0.850991000  | -2.743574000 |
| H  | 0.304592000  | -0.682962000 | -2.639822000 |
| H  | 1.277257000  | 0.772883000  | -2.574417000 |
| H  | 0.395499000  | 6.348416000  | -2.305208000 |
| H  | 3.299153000  | 1.124458000  | 4.949190000  |
| H  | -1.949633000 | -4.112751000 | 1.556979000  |
| Cl | 1.932967000  | 5.237594000  | -0.168534000 |
| Cl | -0.501387000 | -5.270362000 | -0.607319000 |
| Cl | 3.830133000  | 3.024589000  | 2.888653000  |
